# Supplementary material for: Lysine Propionylation is a Widespread Post-Translational Modification Involved in Regulation of Photosynthesis and Metabolism in Cyanobacteria
Source: MDPI journal article supplement (doi:10.3390/ijms20194792), 2019-09-26

Scan number 2398 Raw file Kprop1  
 Method FTMS; HCD Peptide 81.02

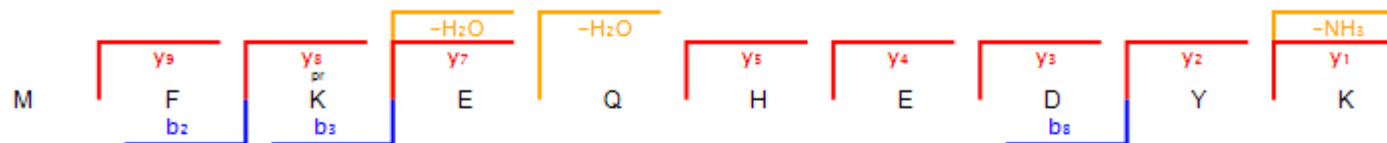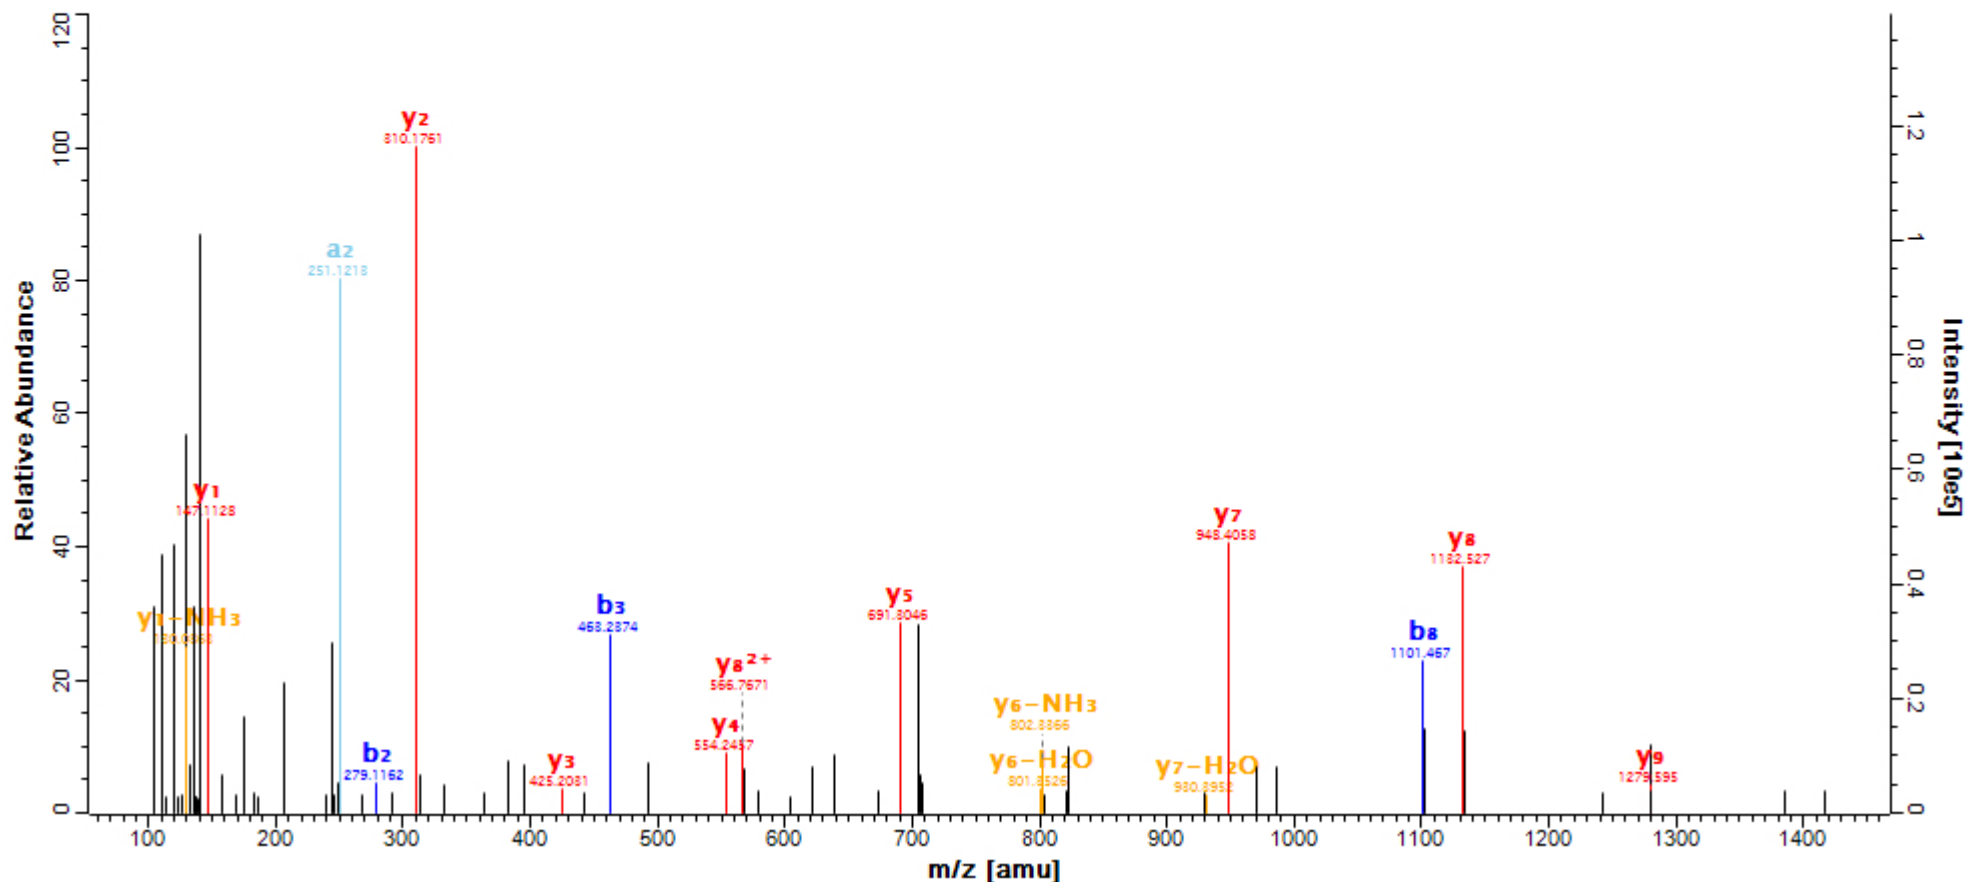

Scan number 2754  
Method FTMS; HCD

Raw file Kprop1  
Peptide 71.35

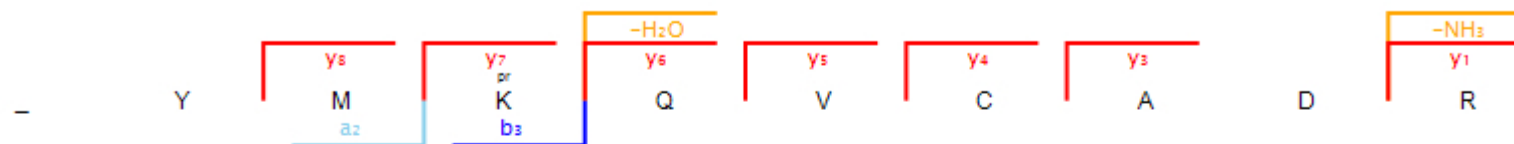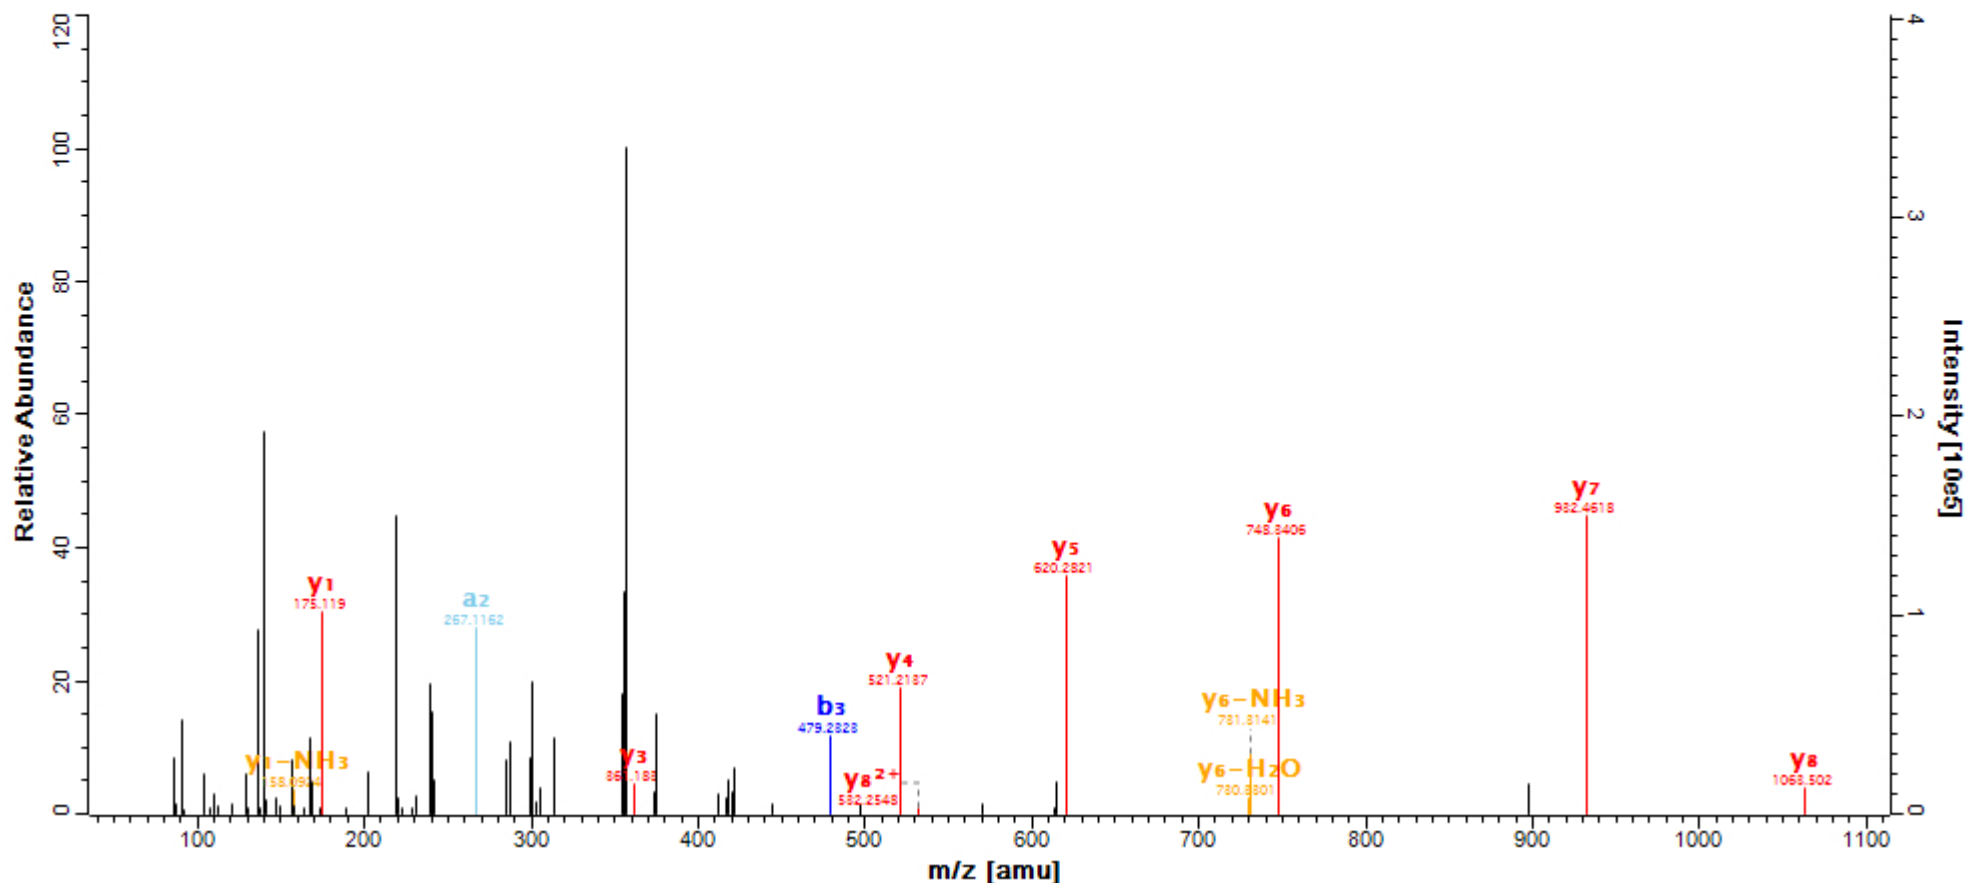

|             |           |          |        |
|-------------|-----------|----------|--------|
| Scan number | 5261      | Raw file | Kprop1 |
| Method      | FTMS; HCD | Pepti... | 132.76 |

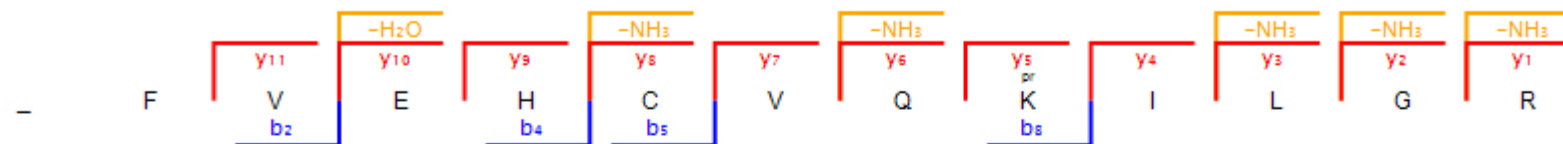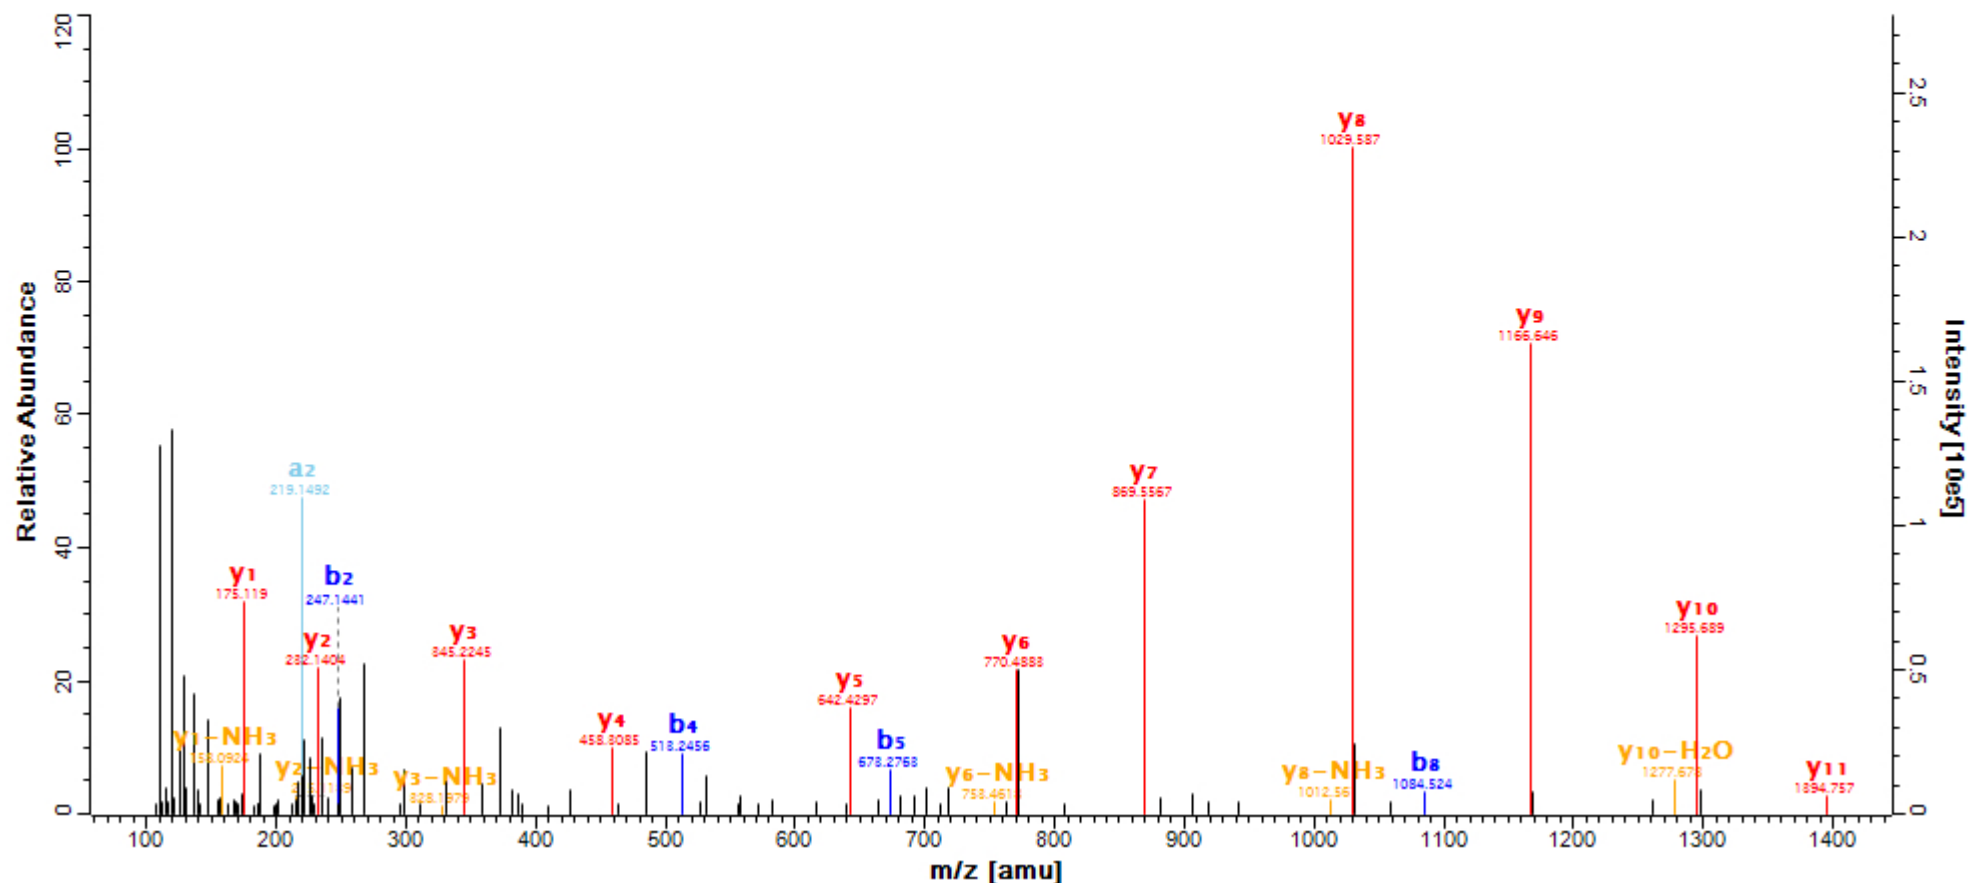

Scan number 5377 Raw file Kprop1  
Method FTMS; HCD Peptide 122.45

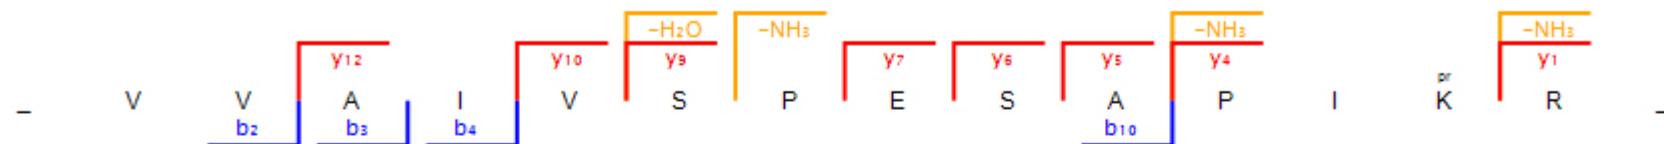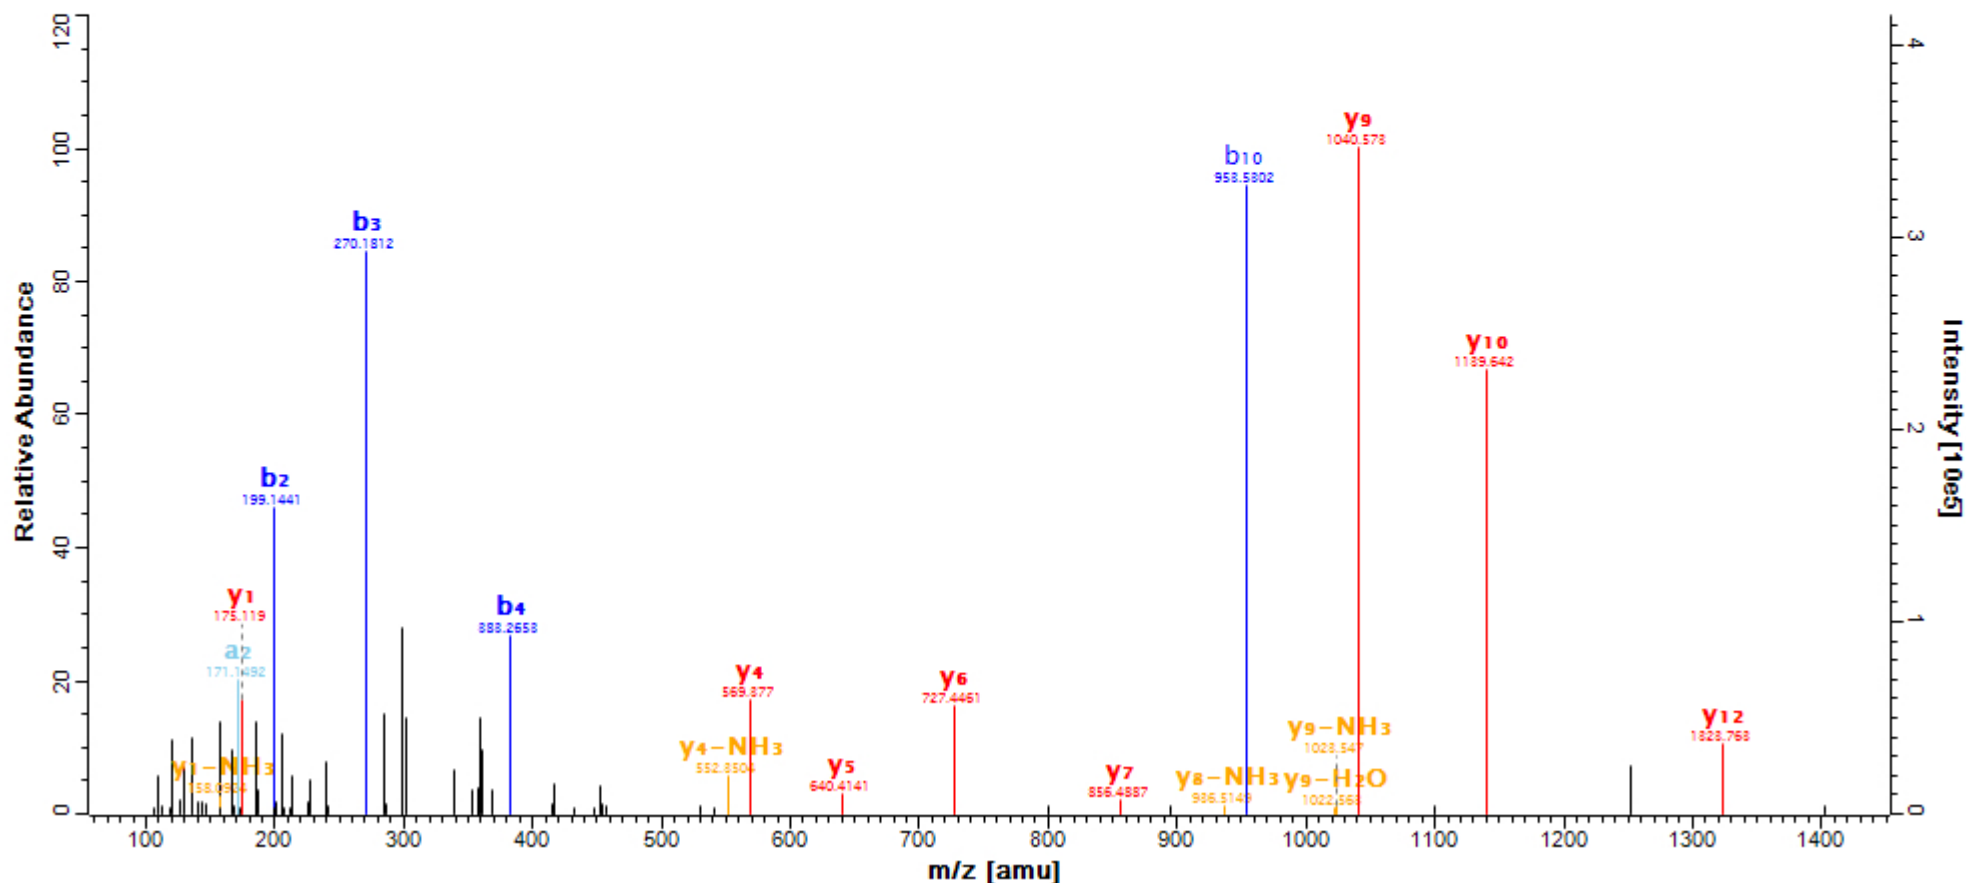



Scan number 5722 Raw file Kprop1  
 Method FTMS; HCD Peptide 109.48

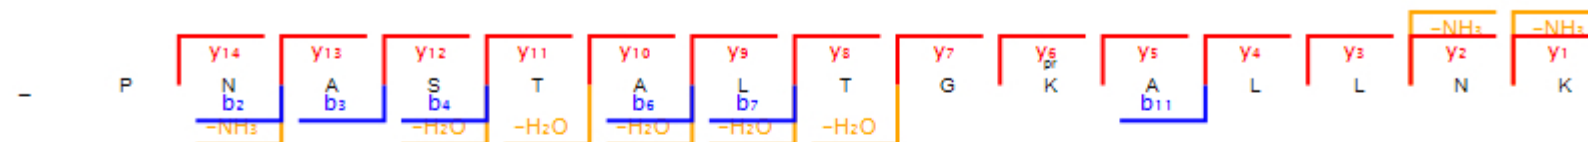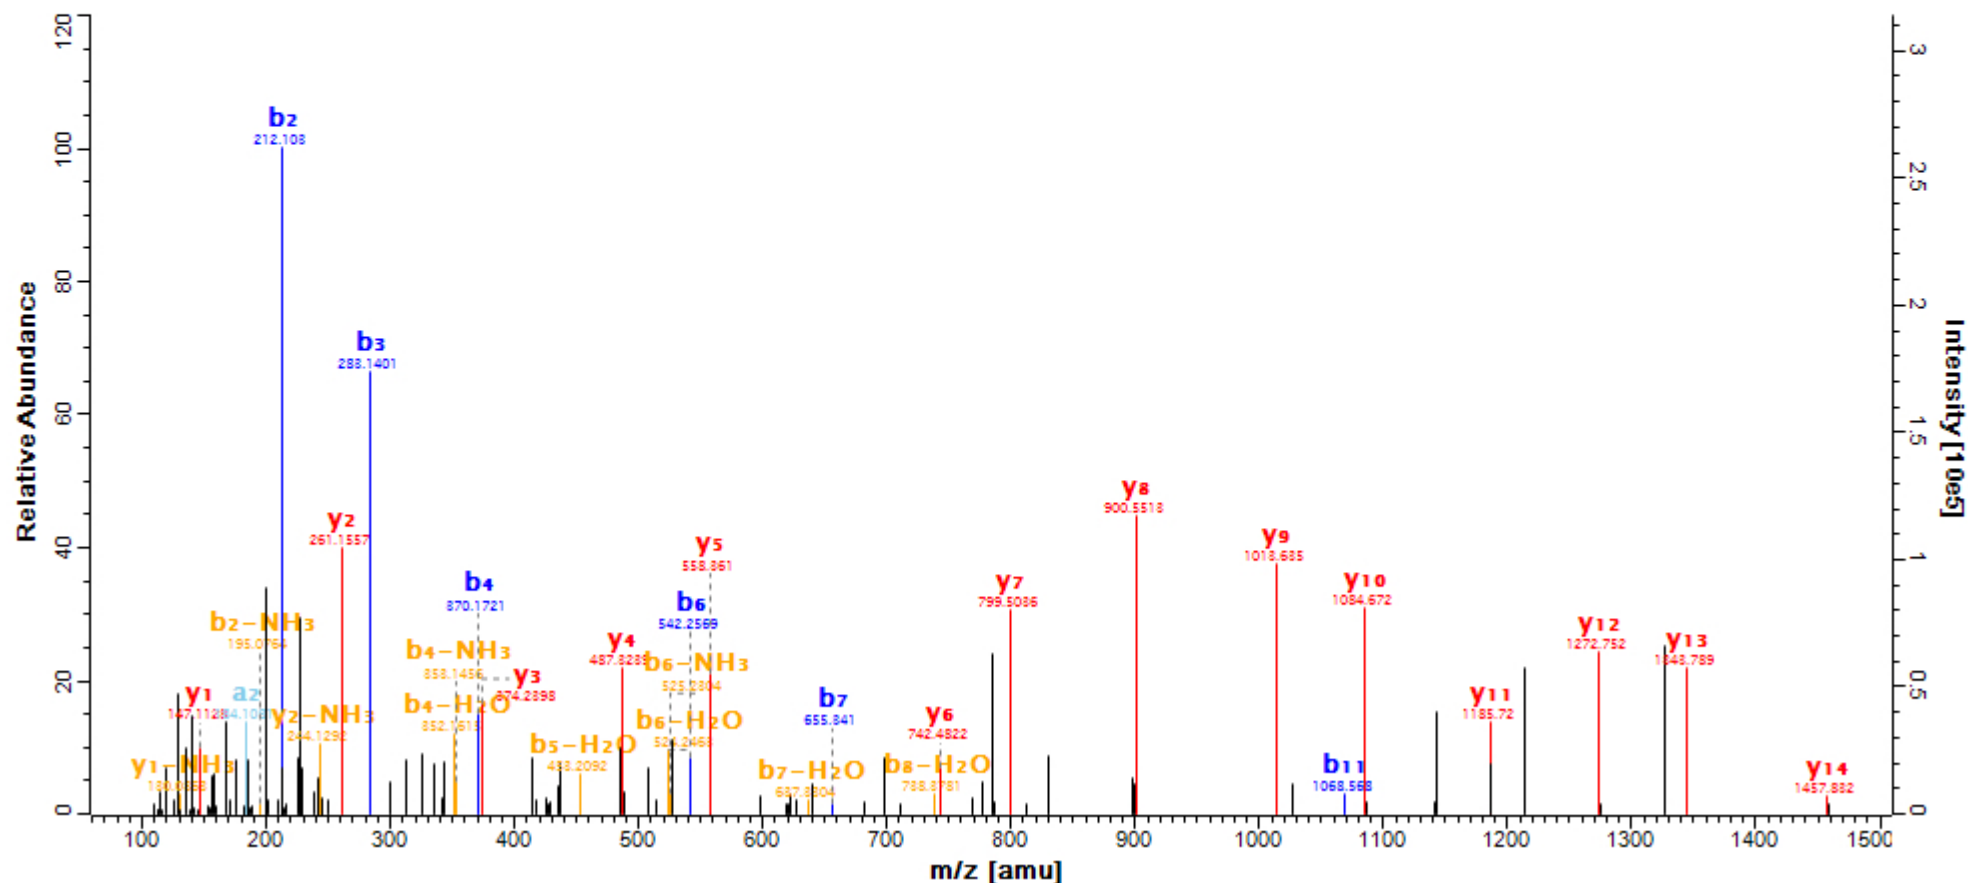

Scan number 5895 Raw file Kprop1  
 Method FTMS; HCD Peptide 97.21

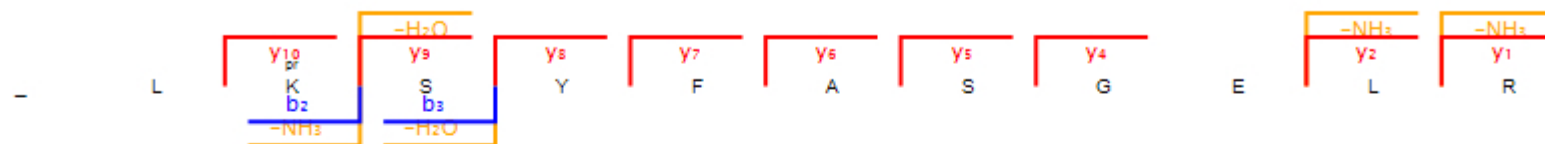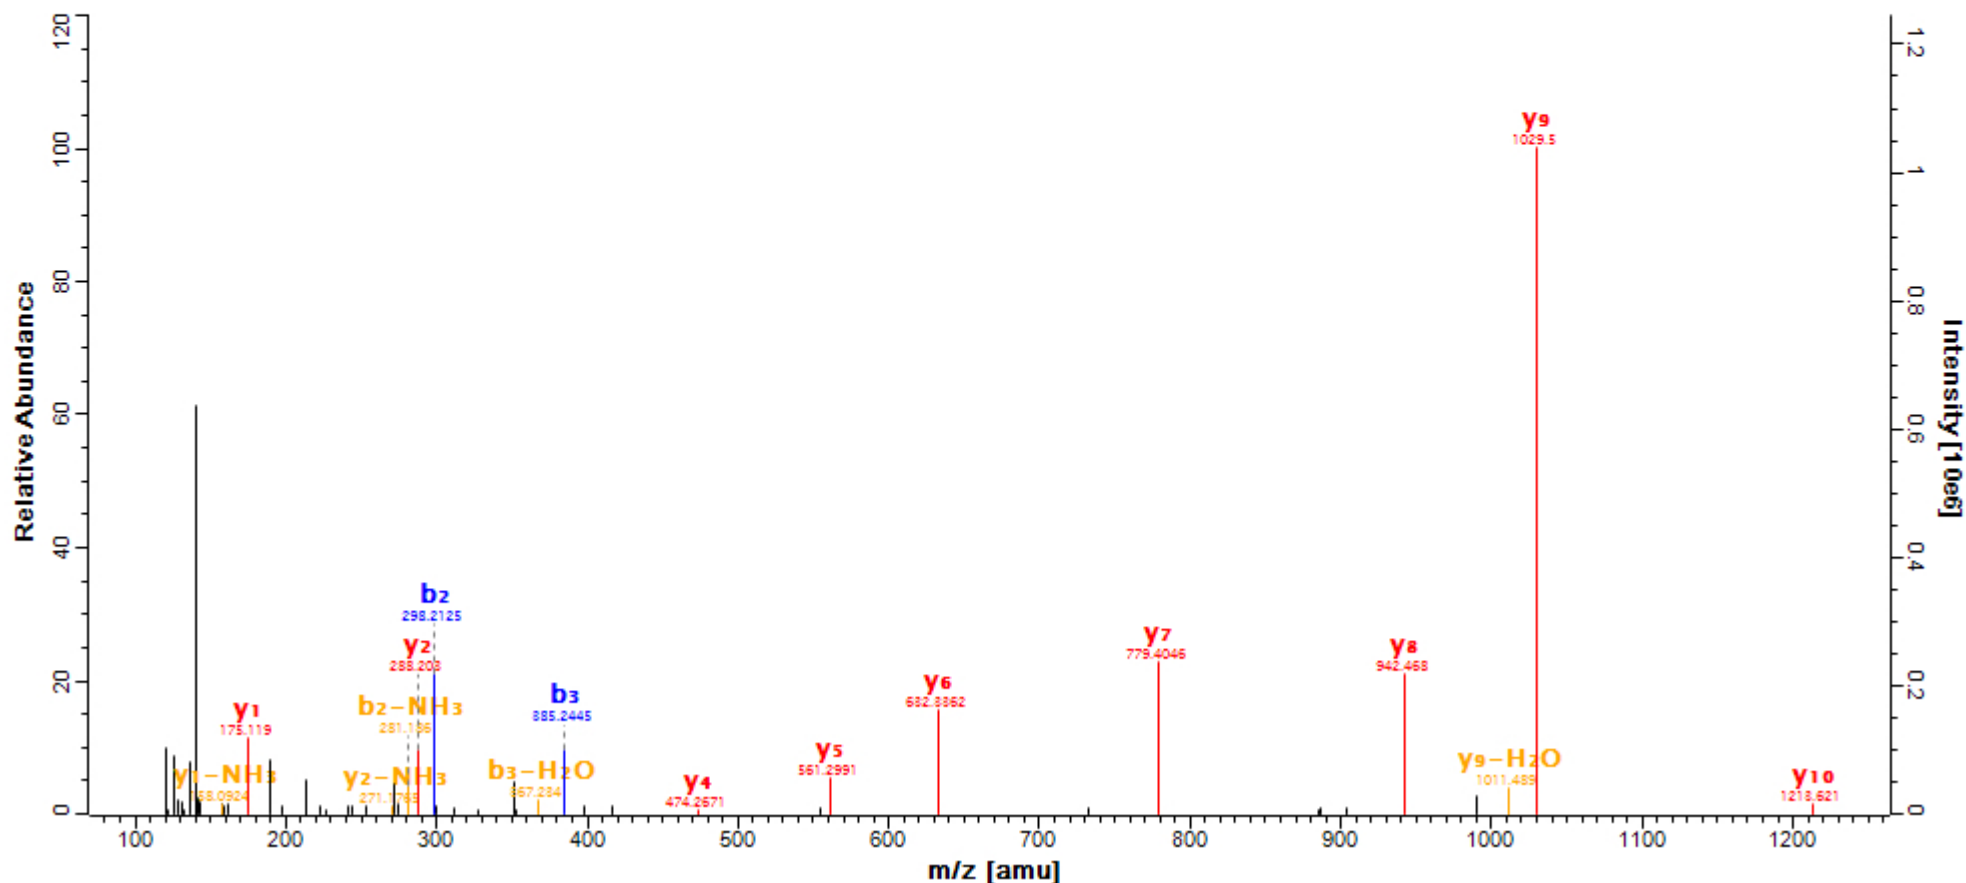

Scan number 6463  
Method FTMS; HCD

Raw file Kprop1  
Peptide 61.73

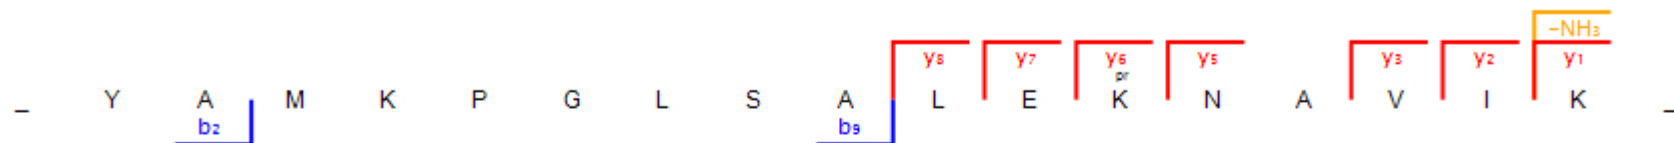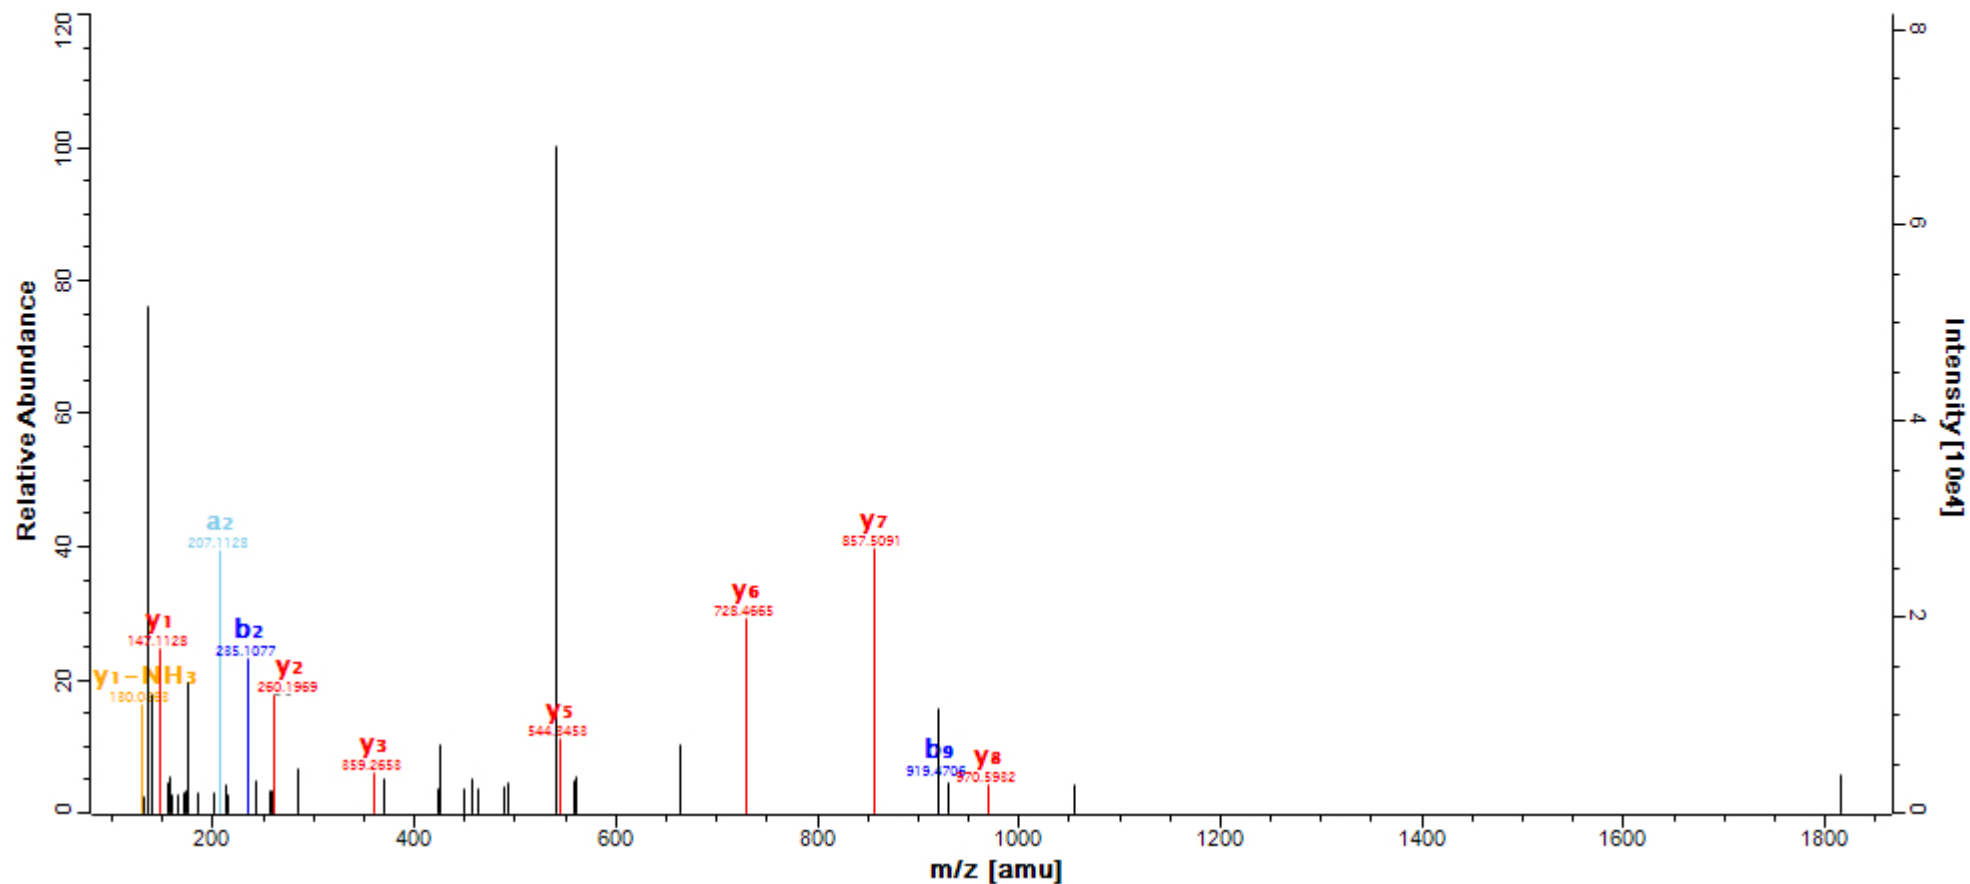

Scan number 6849  
Method FTMS; HCD

Raw file Kprop1  
Peptide 133.09

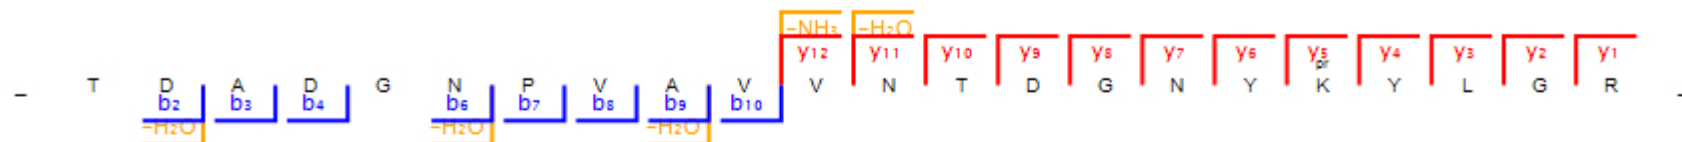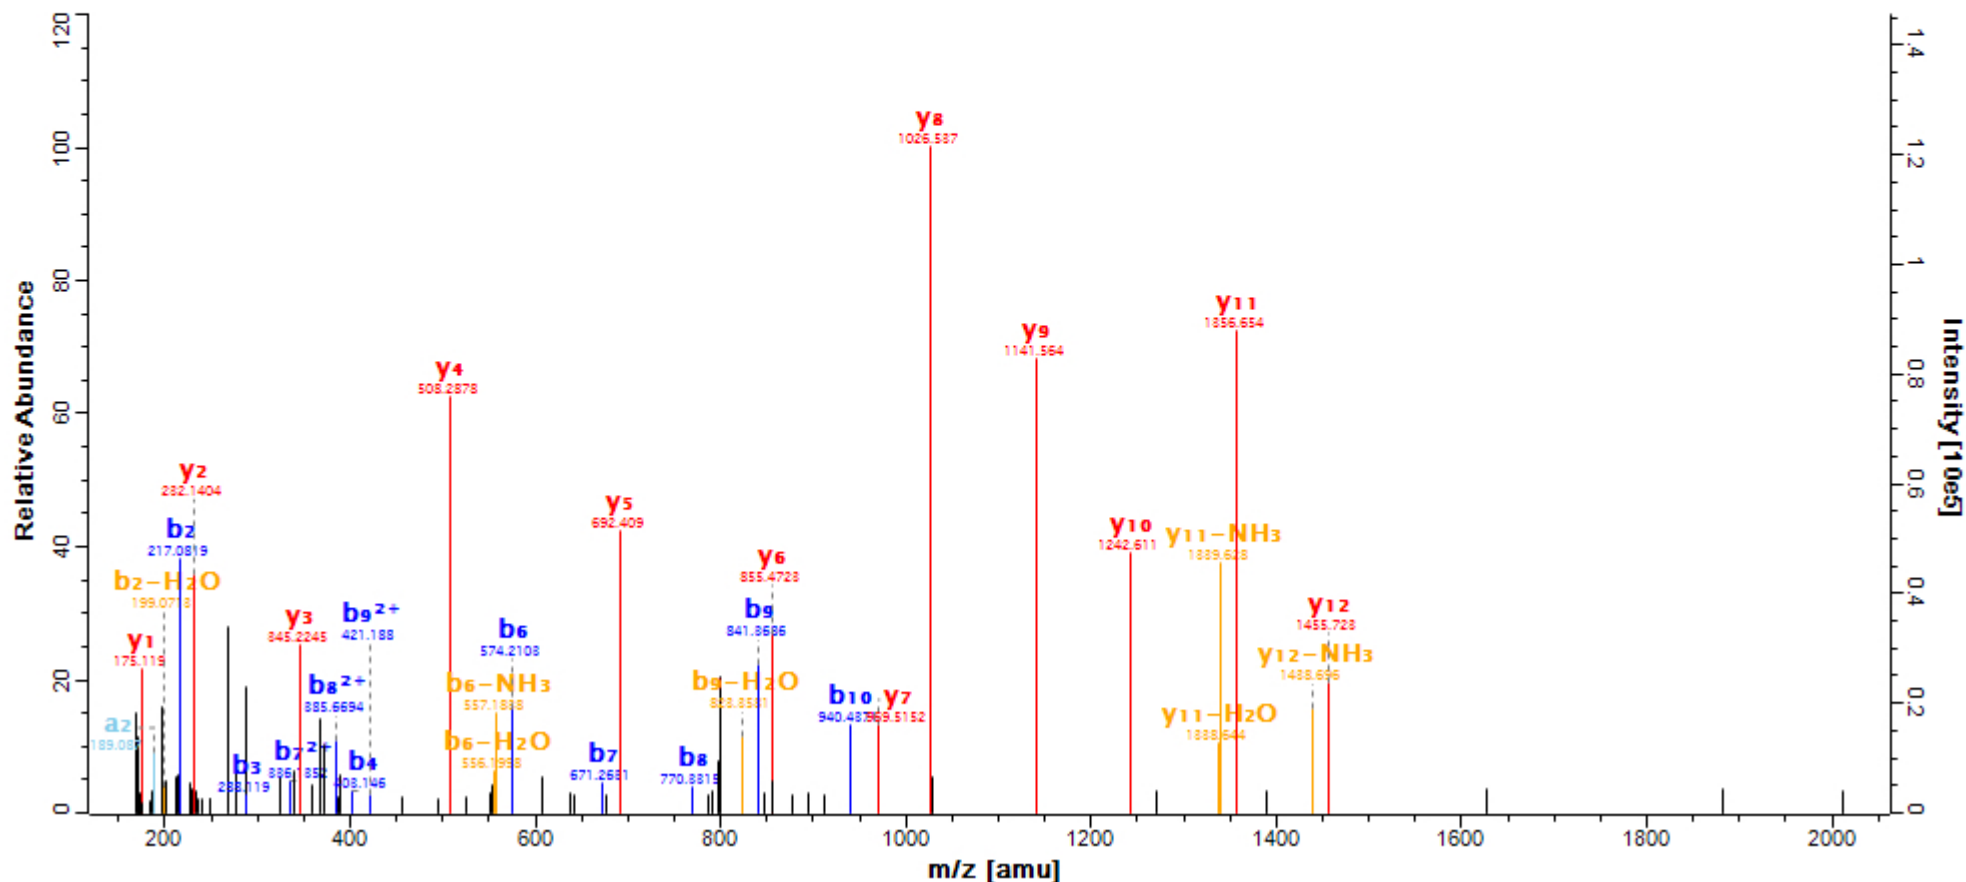

Scan number 6895 Raw file Kprop1  
 Method FTMS; HCD Peptide 151.9

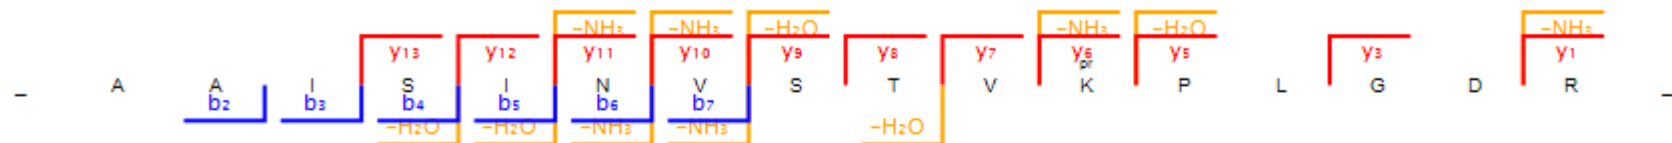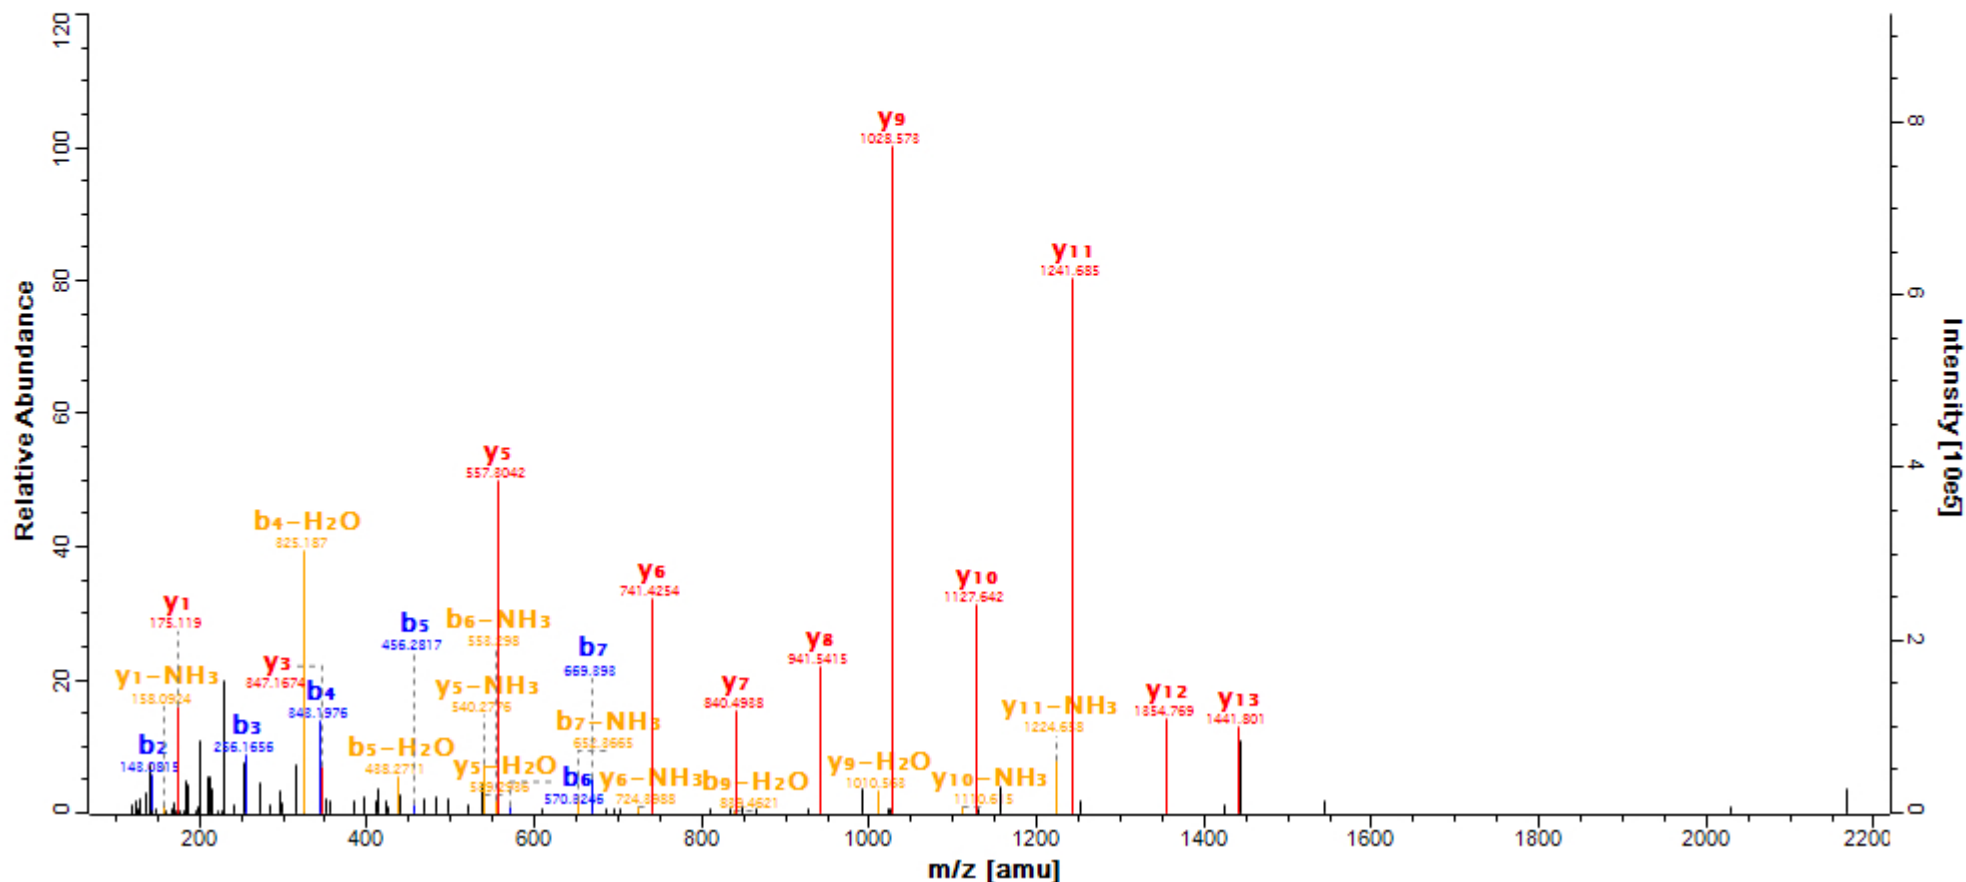

Scan number 7154  
Method FTMS; HCD

Raw file Kprop1  
Peptide 111.58

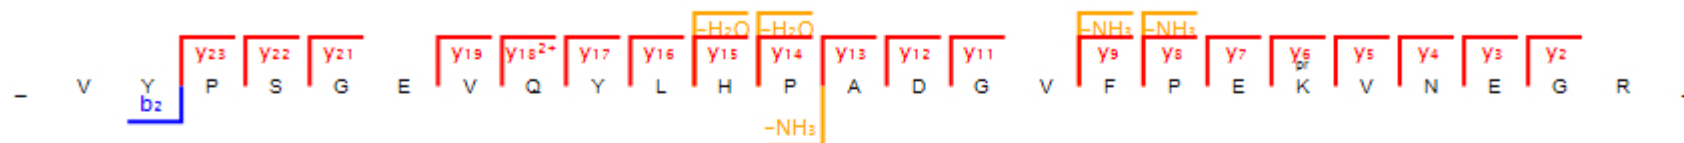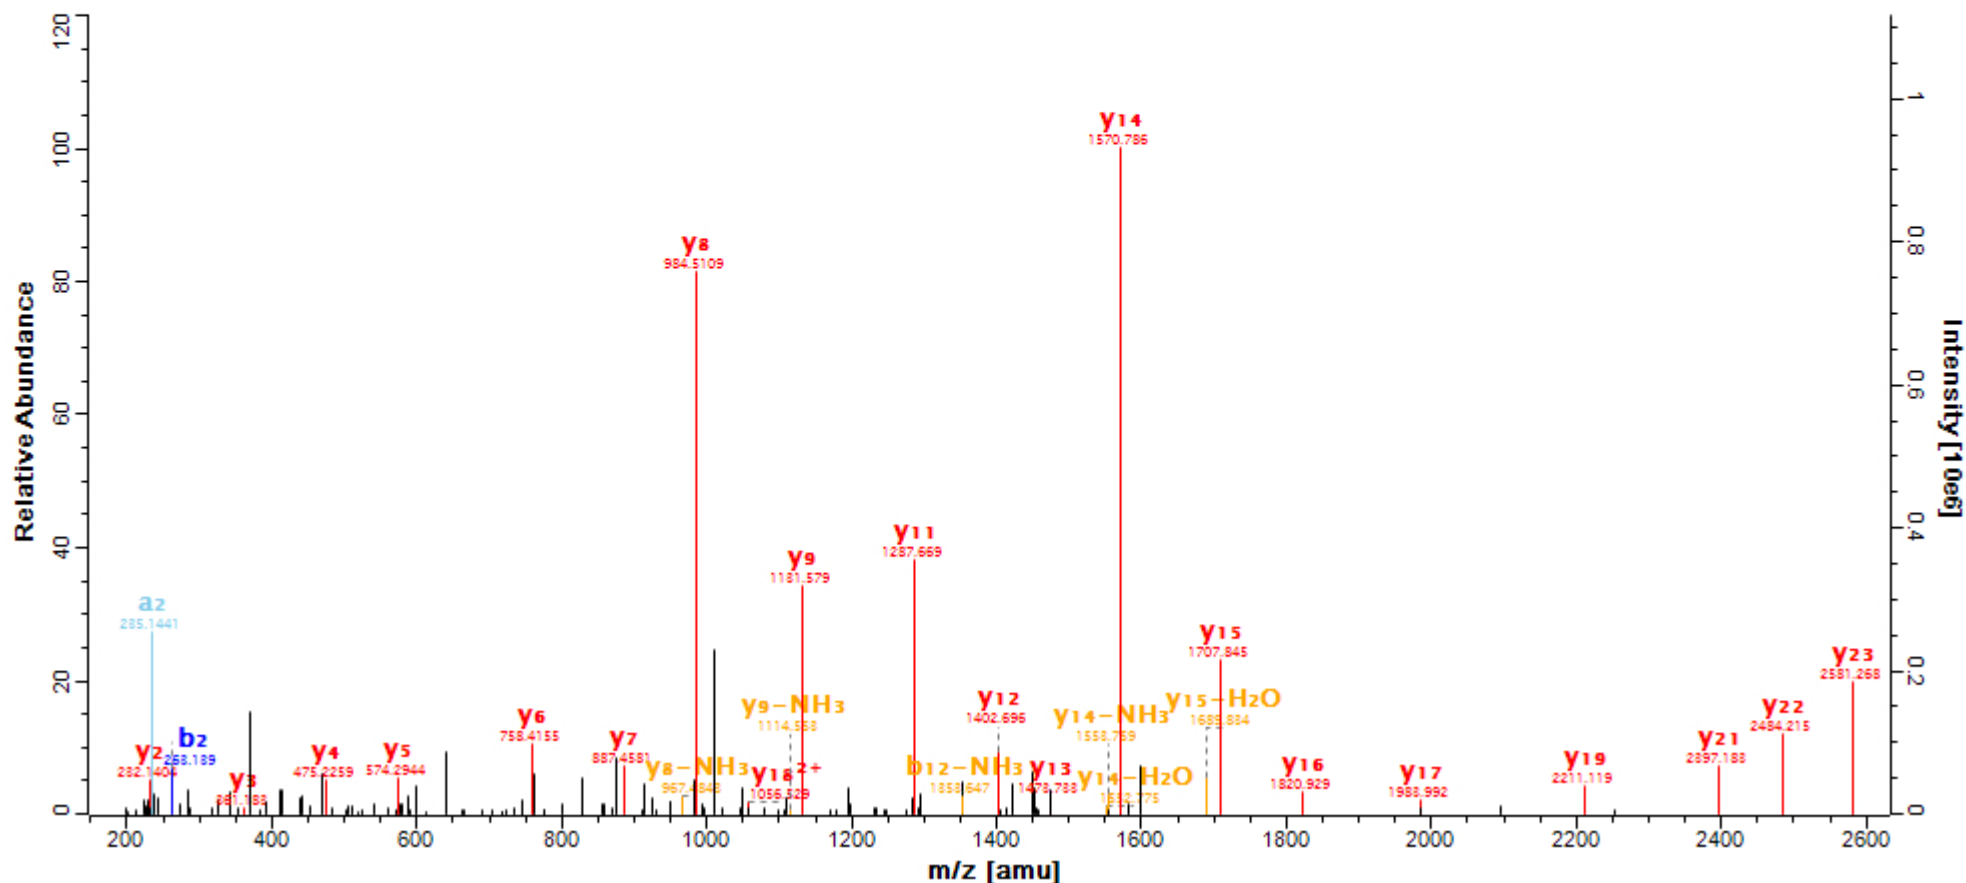

Scan number 7745 Raw file Kprop1  
 Method FTMS; HCD Peptide 43.16

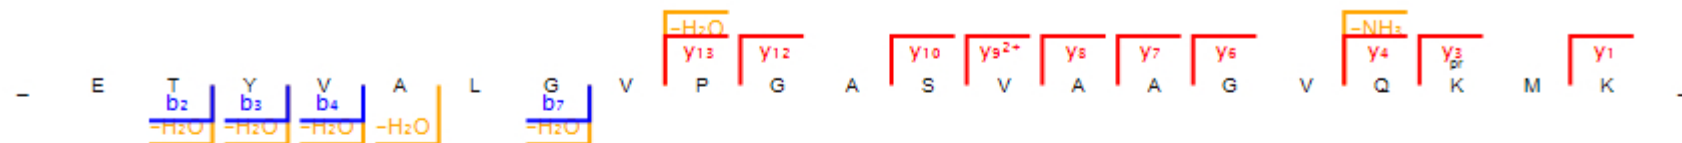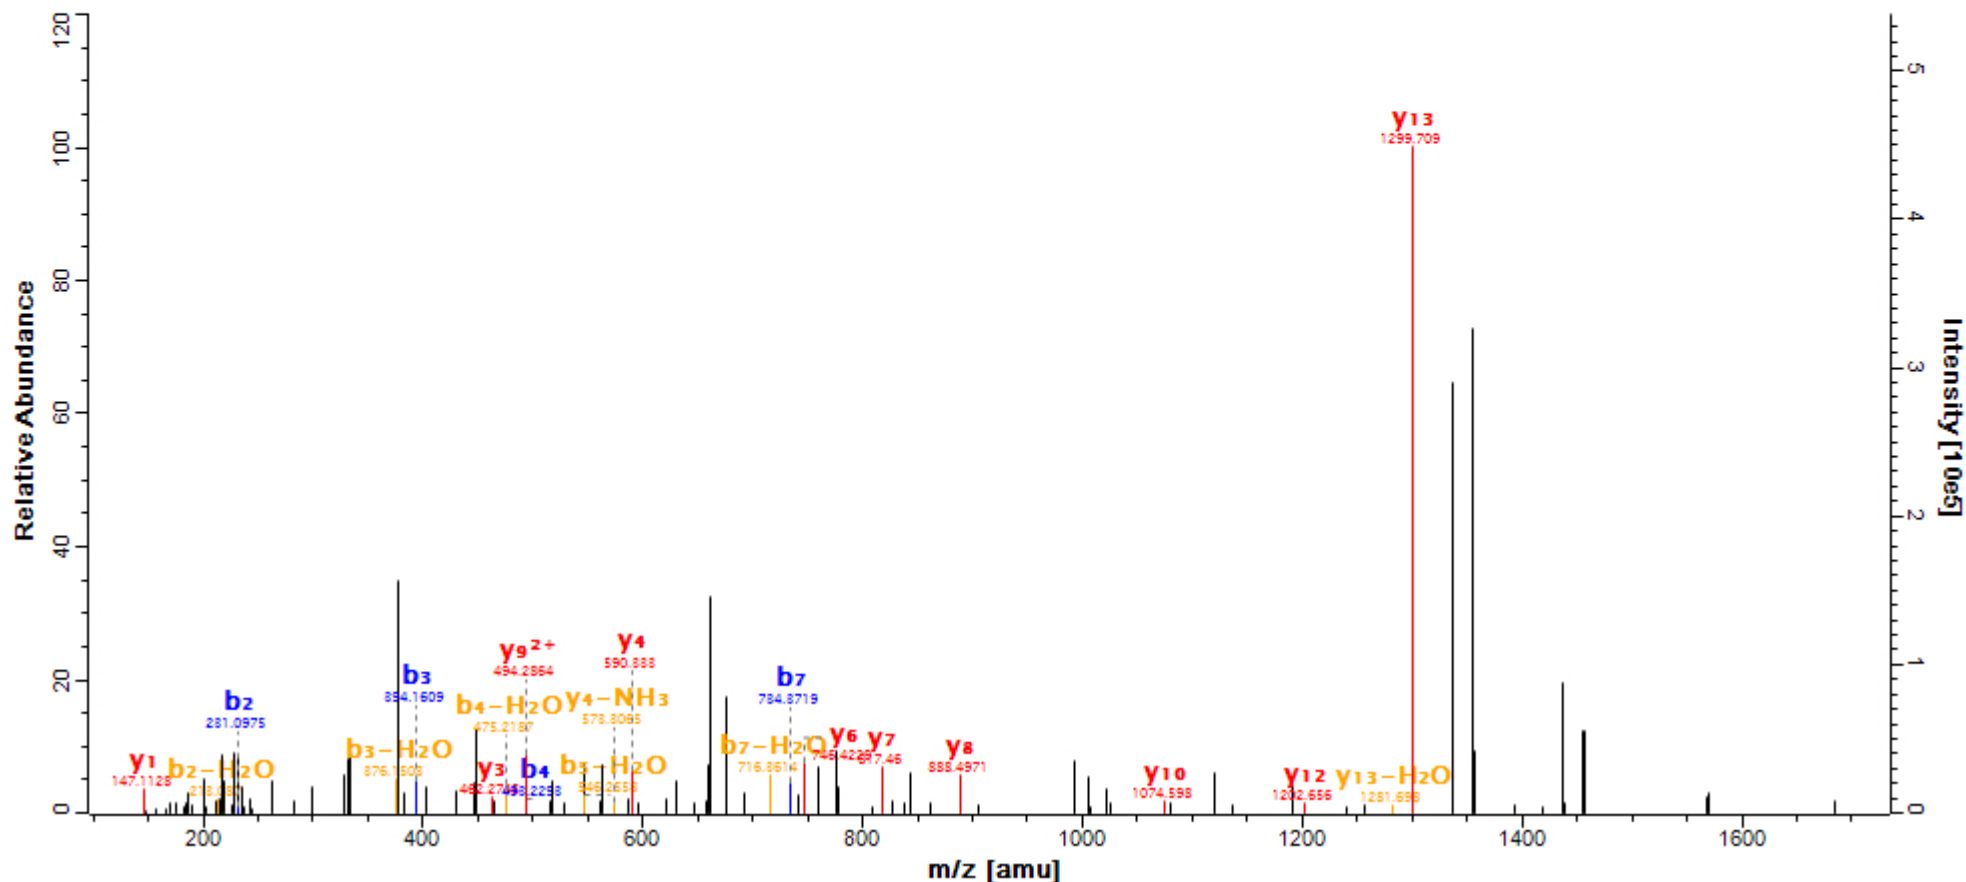

Scan number 8158  
Method FTMS; HCD

Raw file Kprop1  
Peptide 75.82

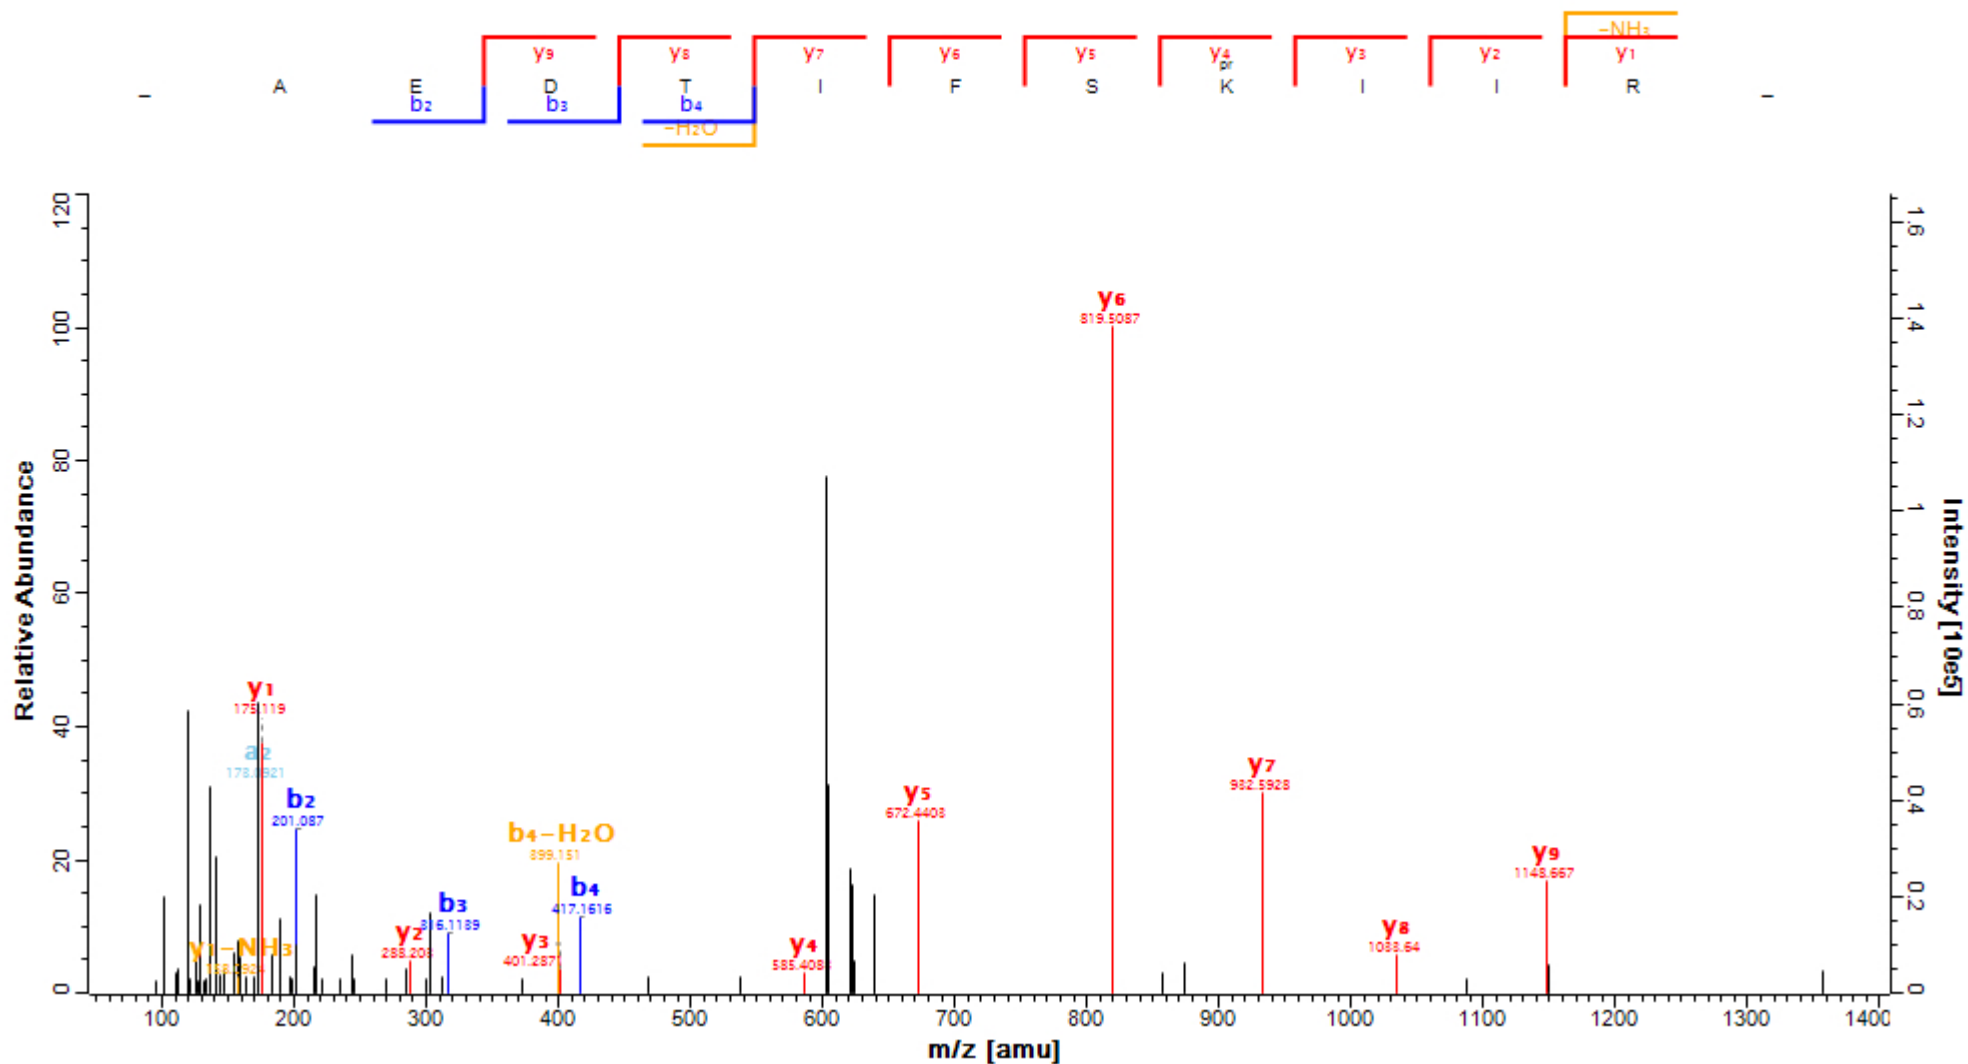



Scan number 8227 Raw file Kprop1  
 Method FTMS; HCD Peptide 227.89

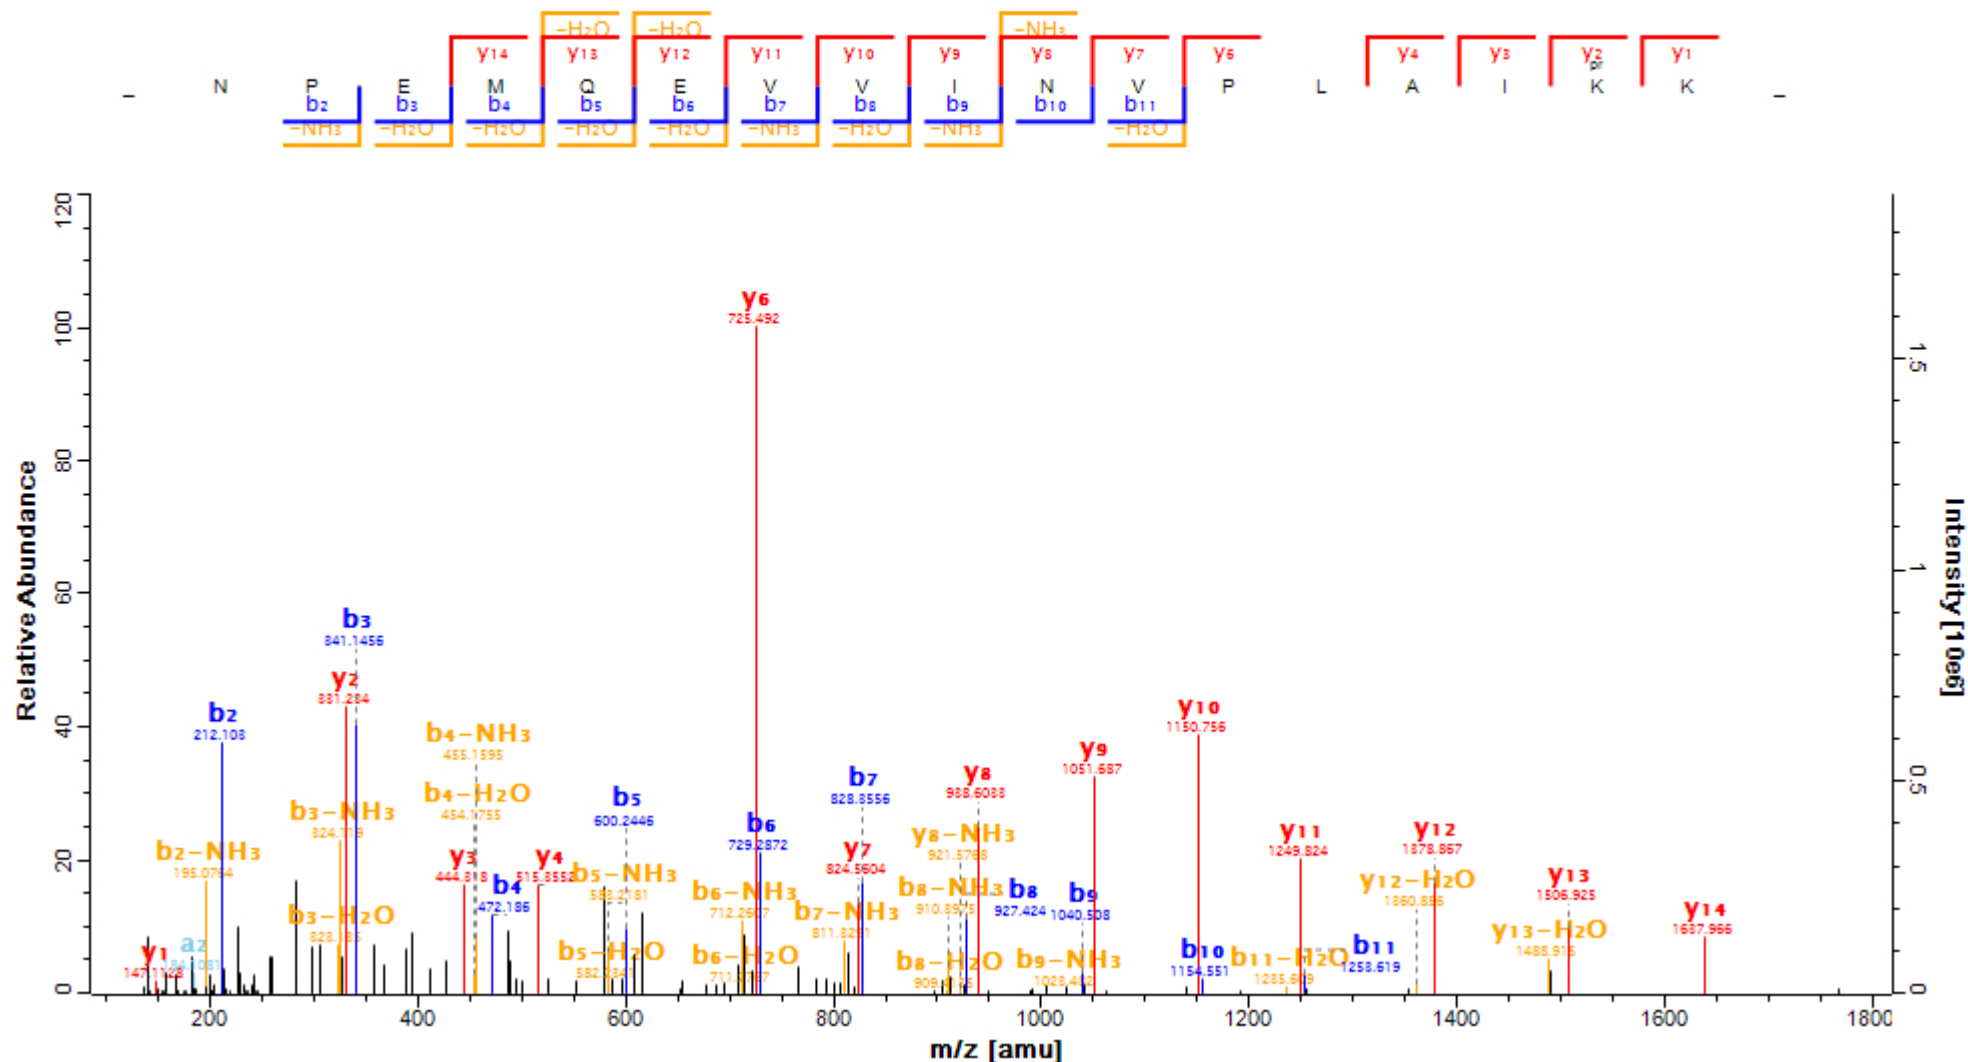

Scan number 8915 Raw file Kprop1  
Method FTMS; HCD Peptide 131.56

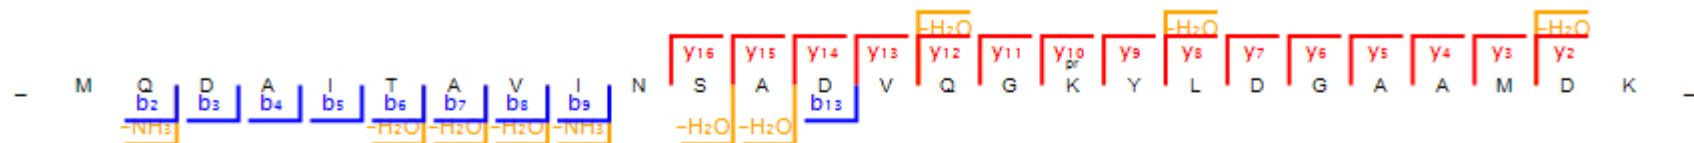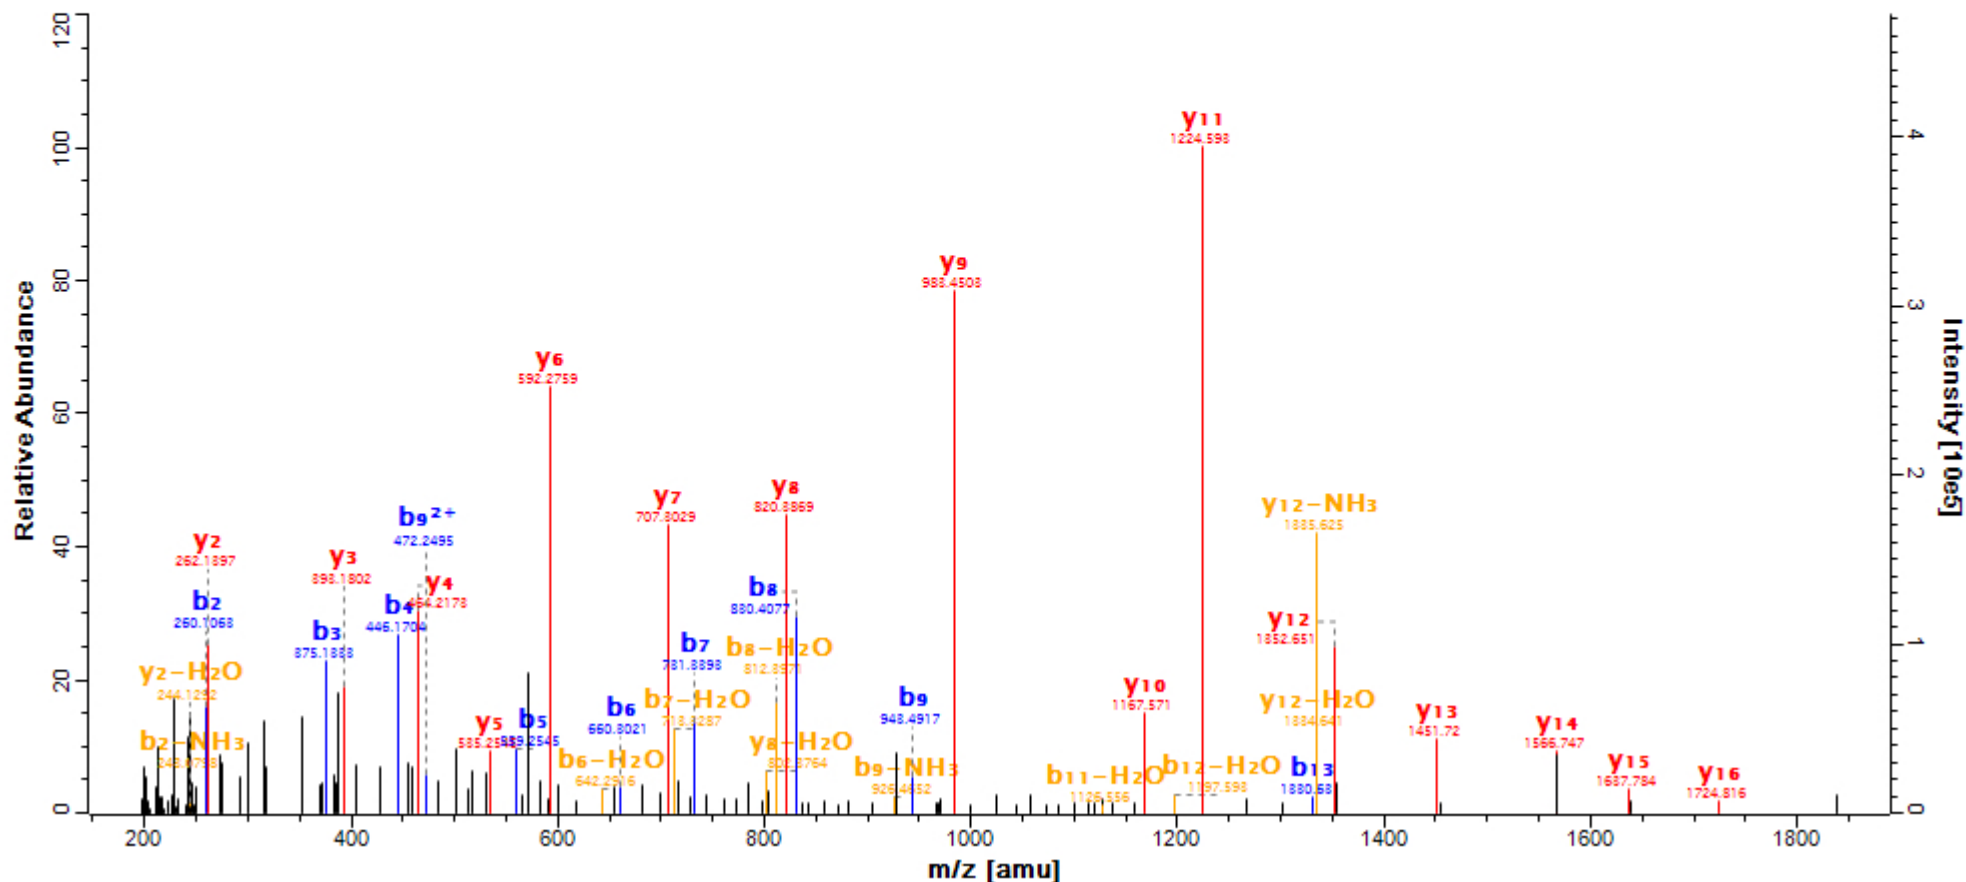

Scan number 2222 Raw file Kprop2  
 Method FTMS; HCD Peptide 156.08

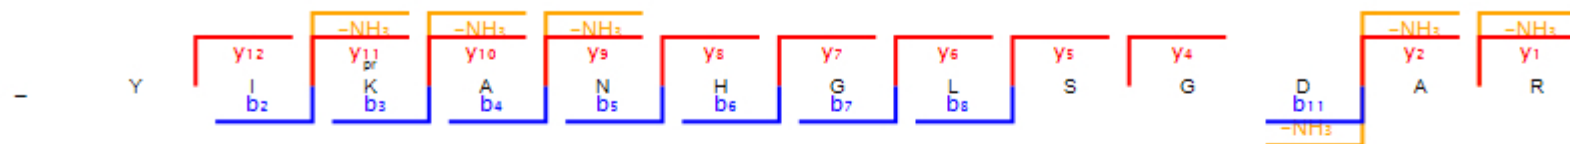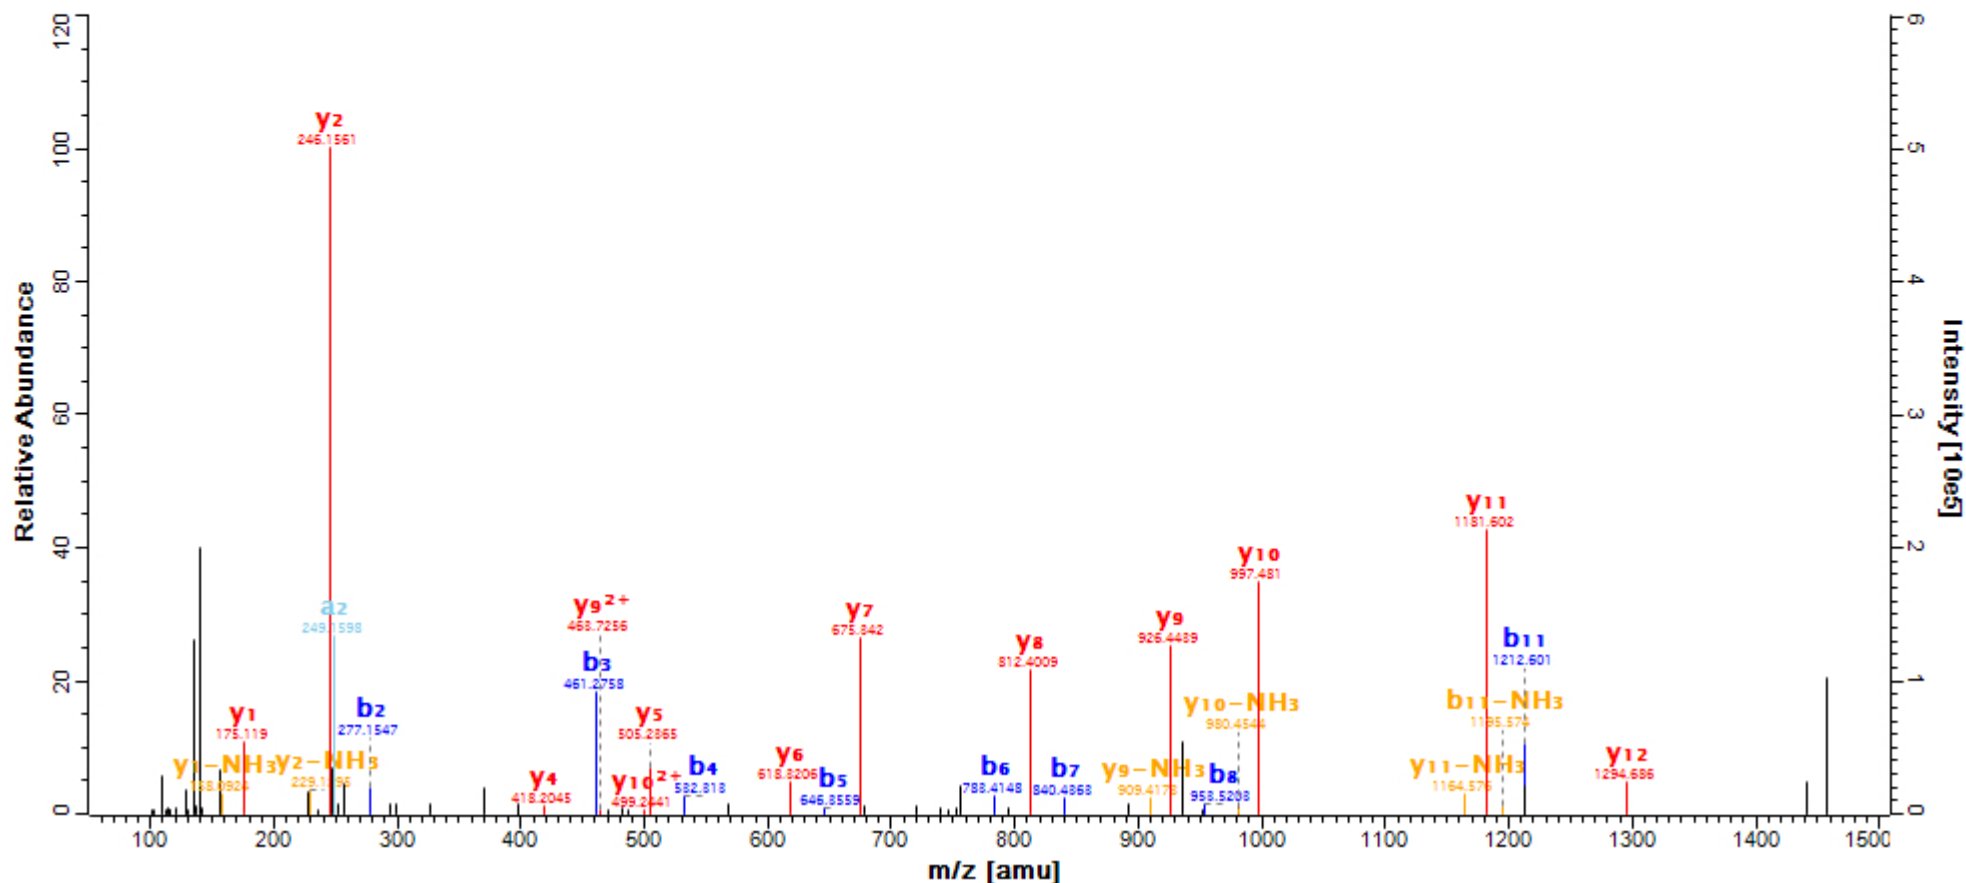

|             |           |          |        |
|-------------|-----------|----------|--------|
| Scan number | 3217      | Raw file | Kprop2 |
| Method      | FTMS; HCD | Pepti... | 76.66  |

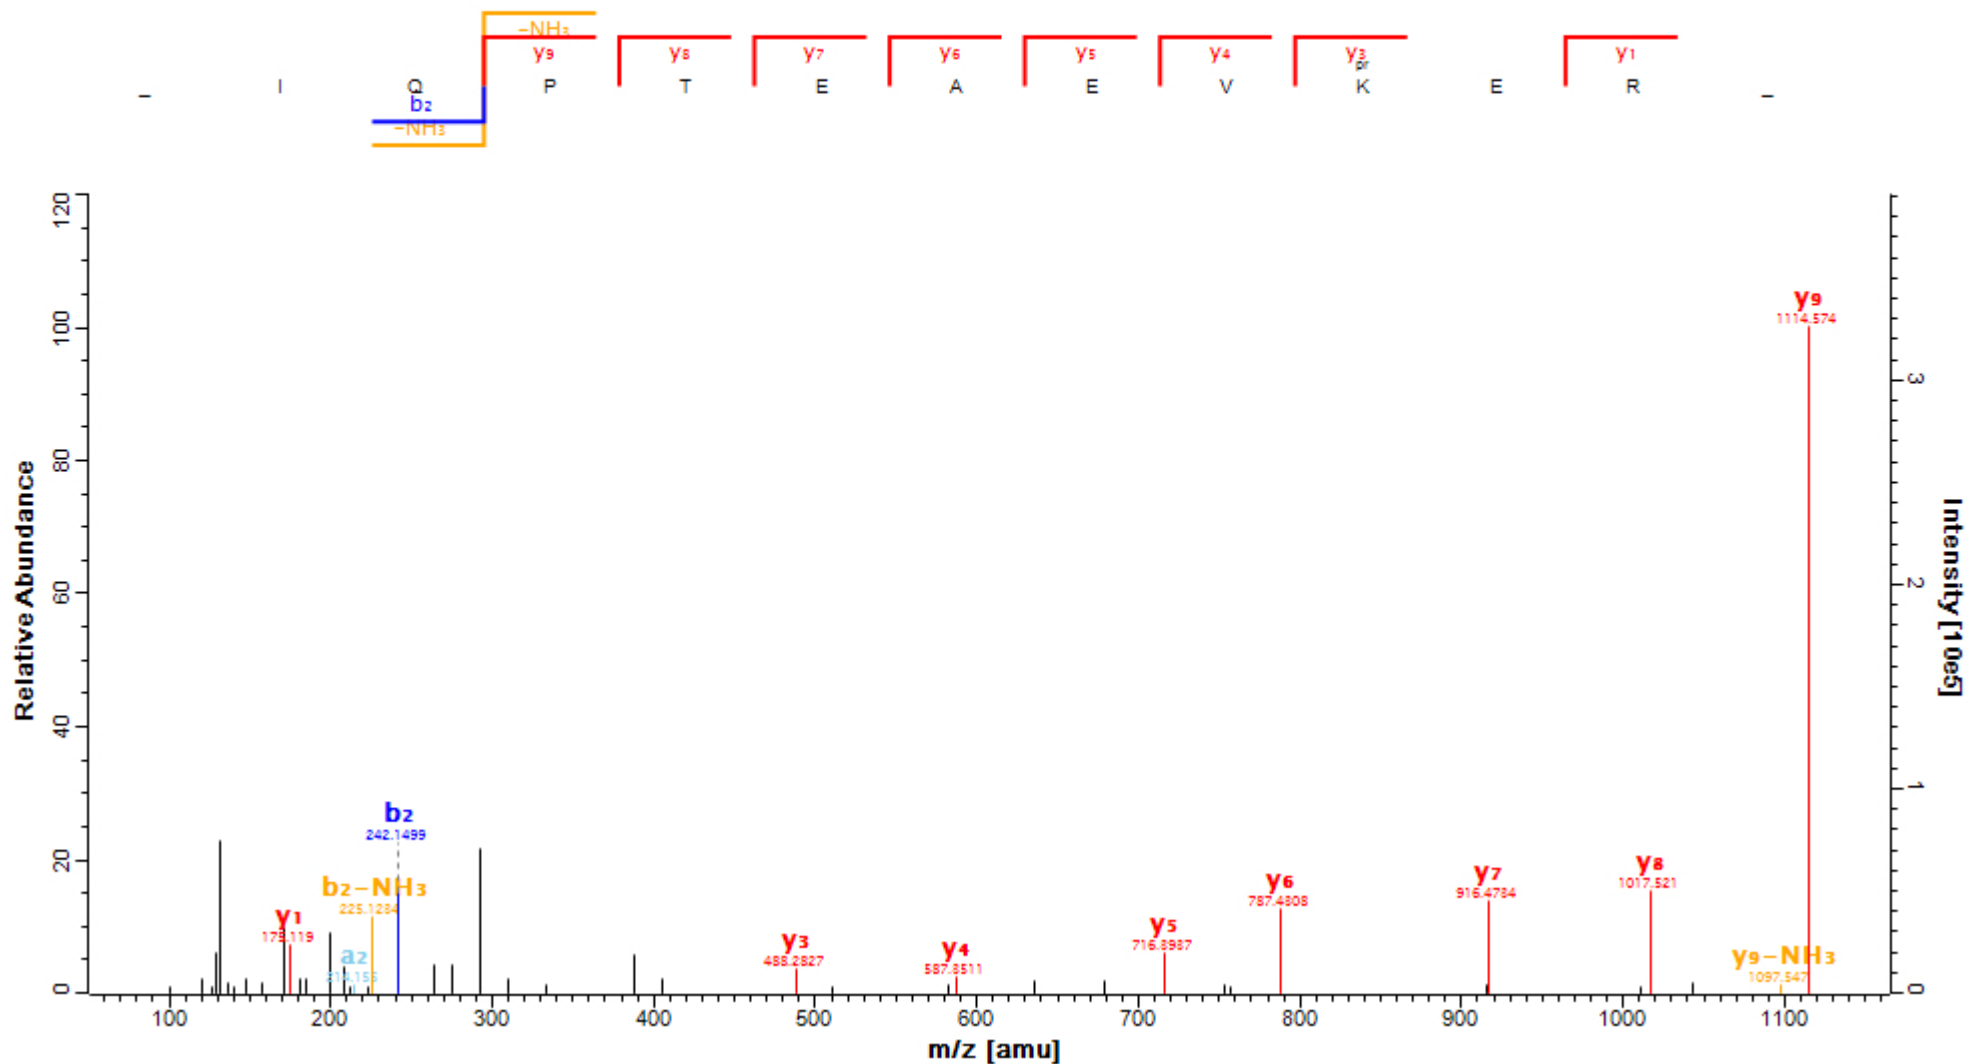

Scan number 3485  
Method FTMS; HCD

Raw file Kprop2  
Peptide 75.38

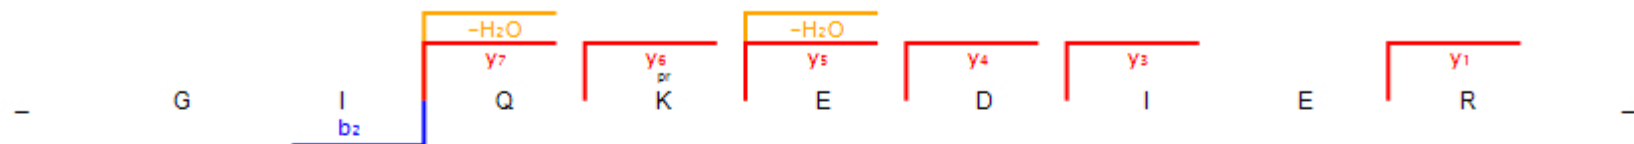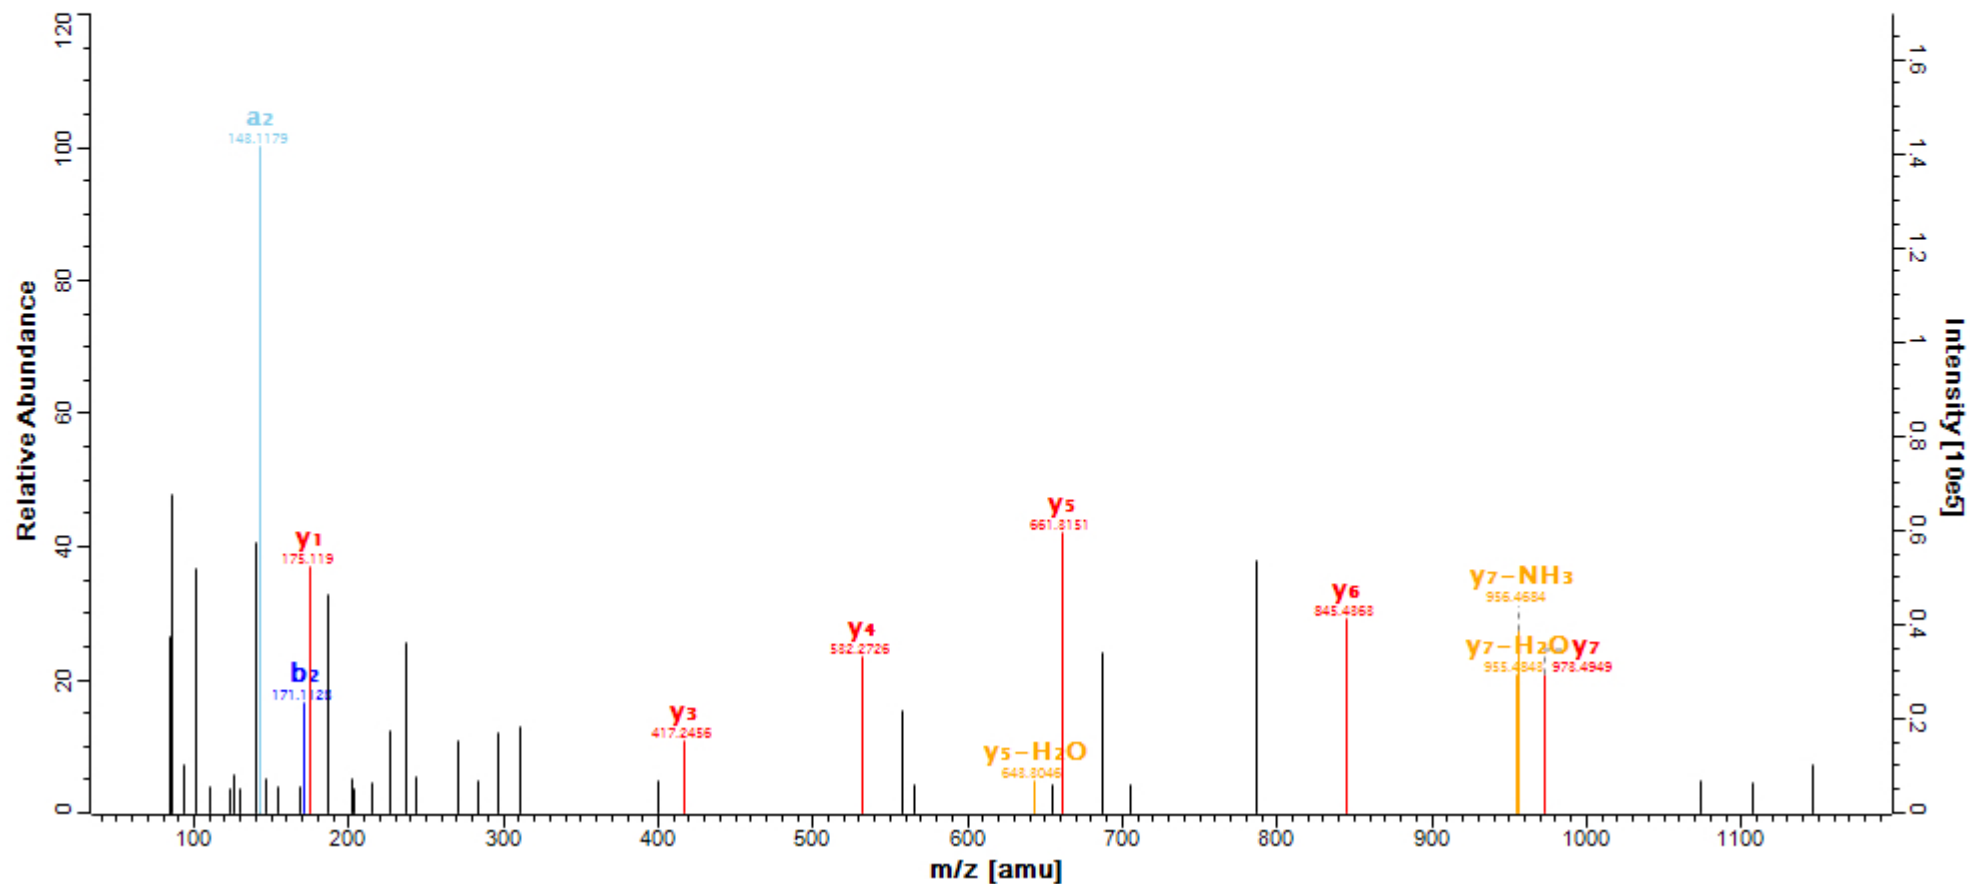

Scan number 3677  
Method FTMS; HCD

Raw file Kprop2  
Peptide 80.01

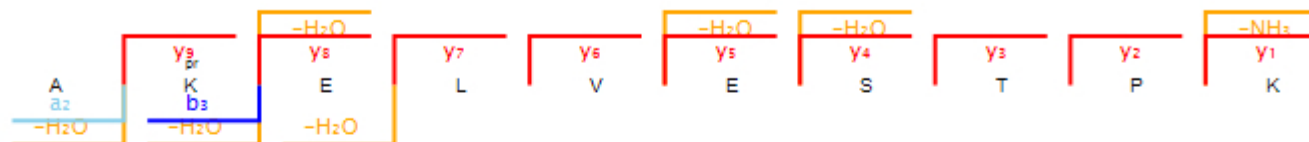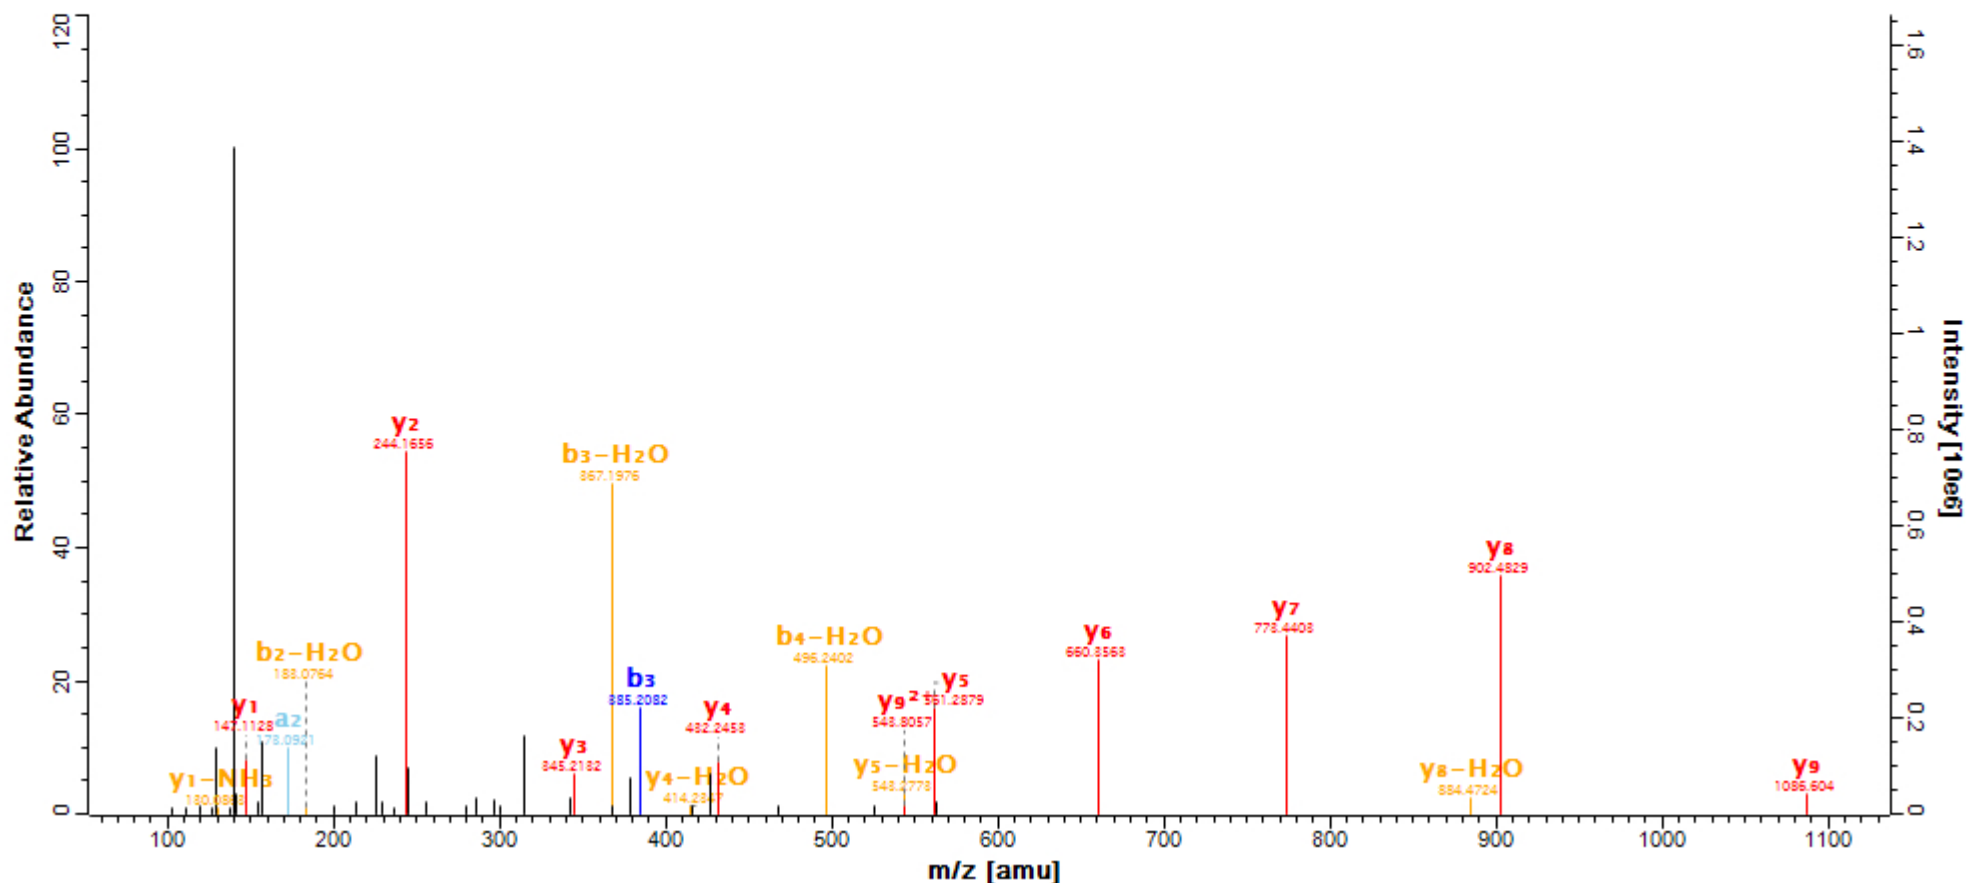

Scan number 3705 Raw file Kprop2  
 Method FTMS; HCD Peptide 80.47

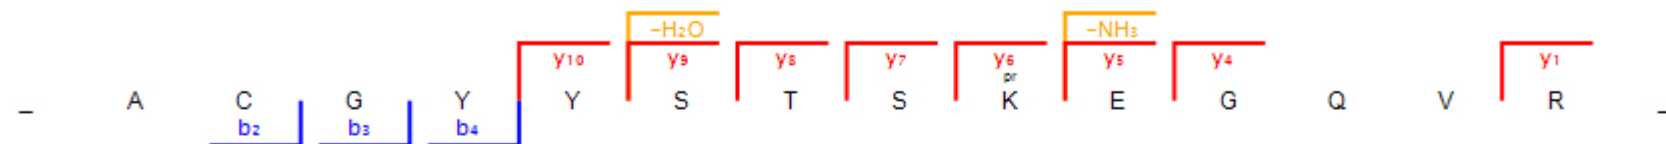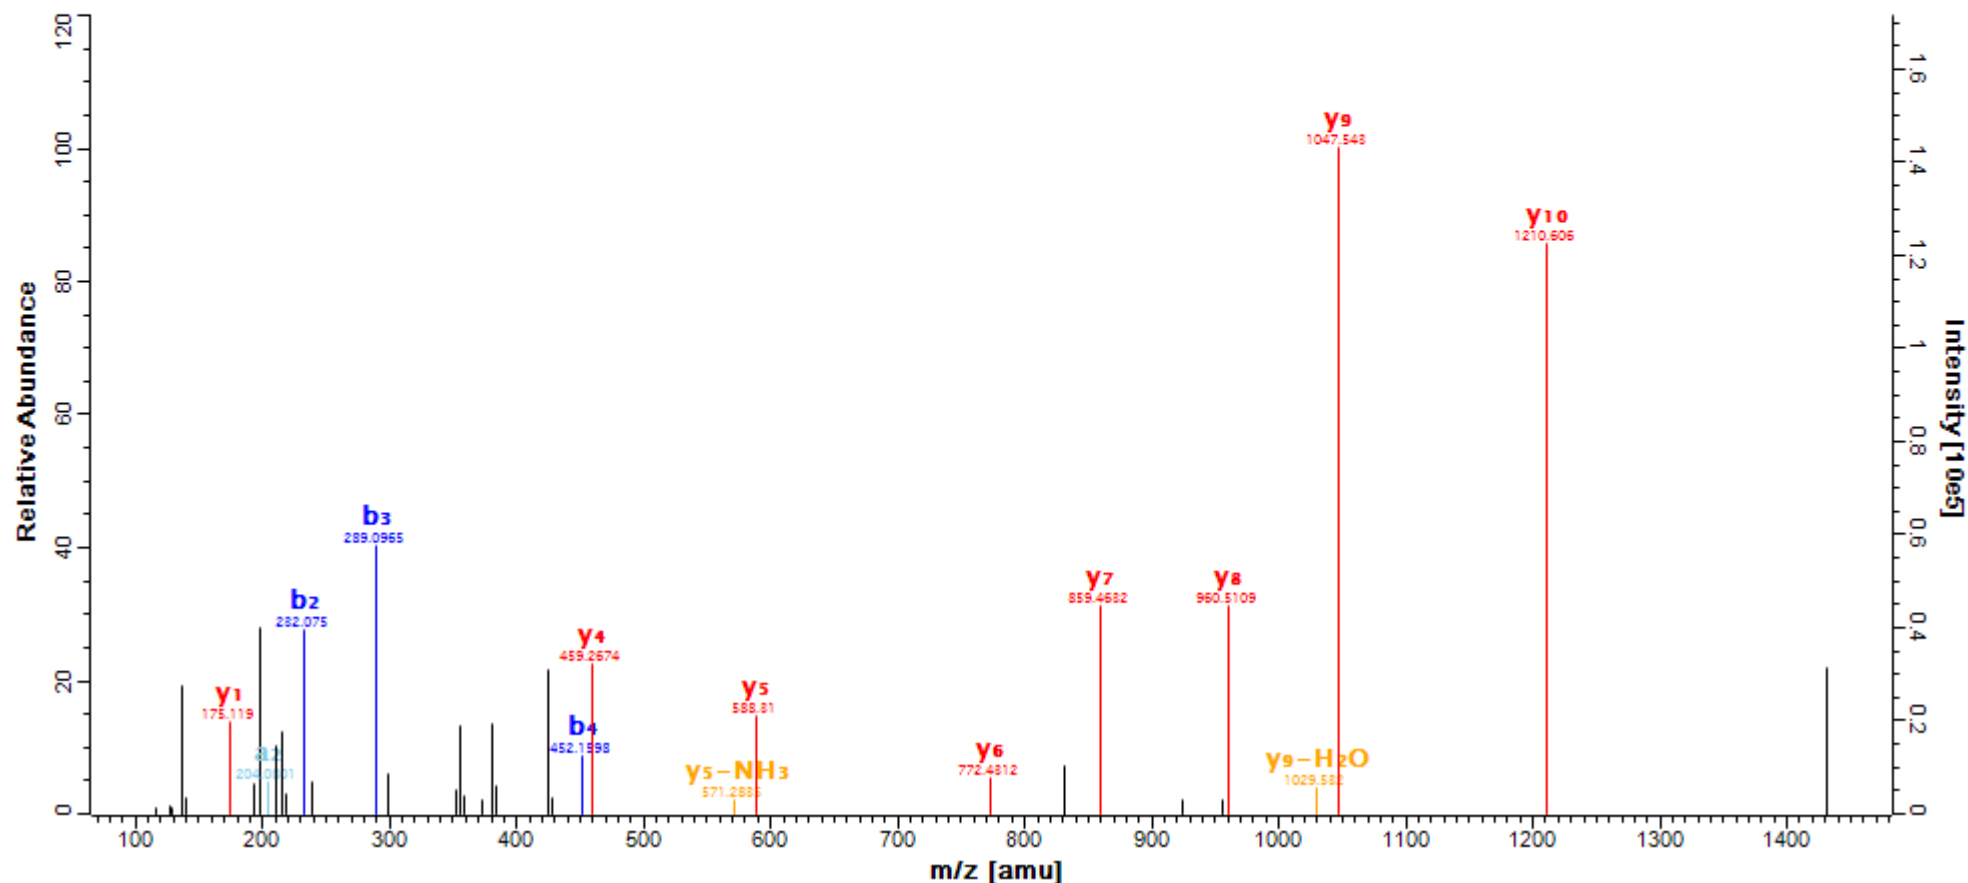

Scan number 4919 Raw file Kprop2  
 Method FTMS; HCD Peptide 91.91

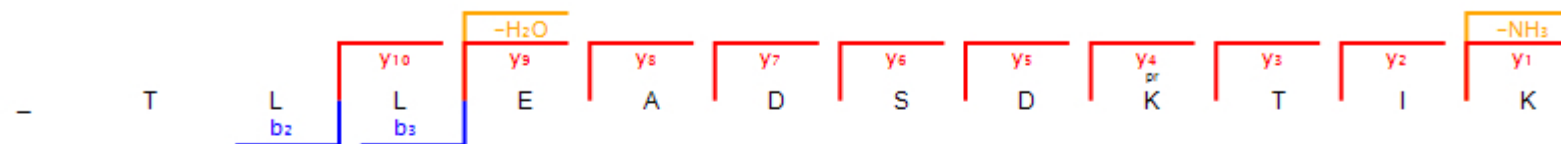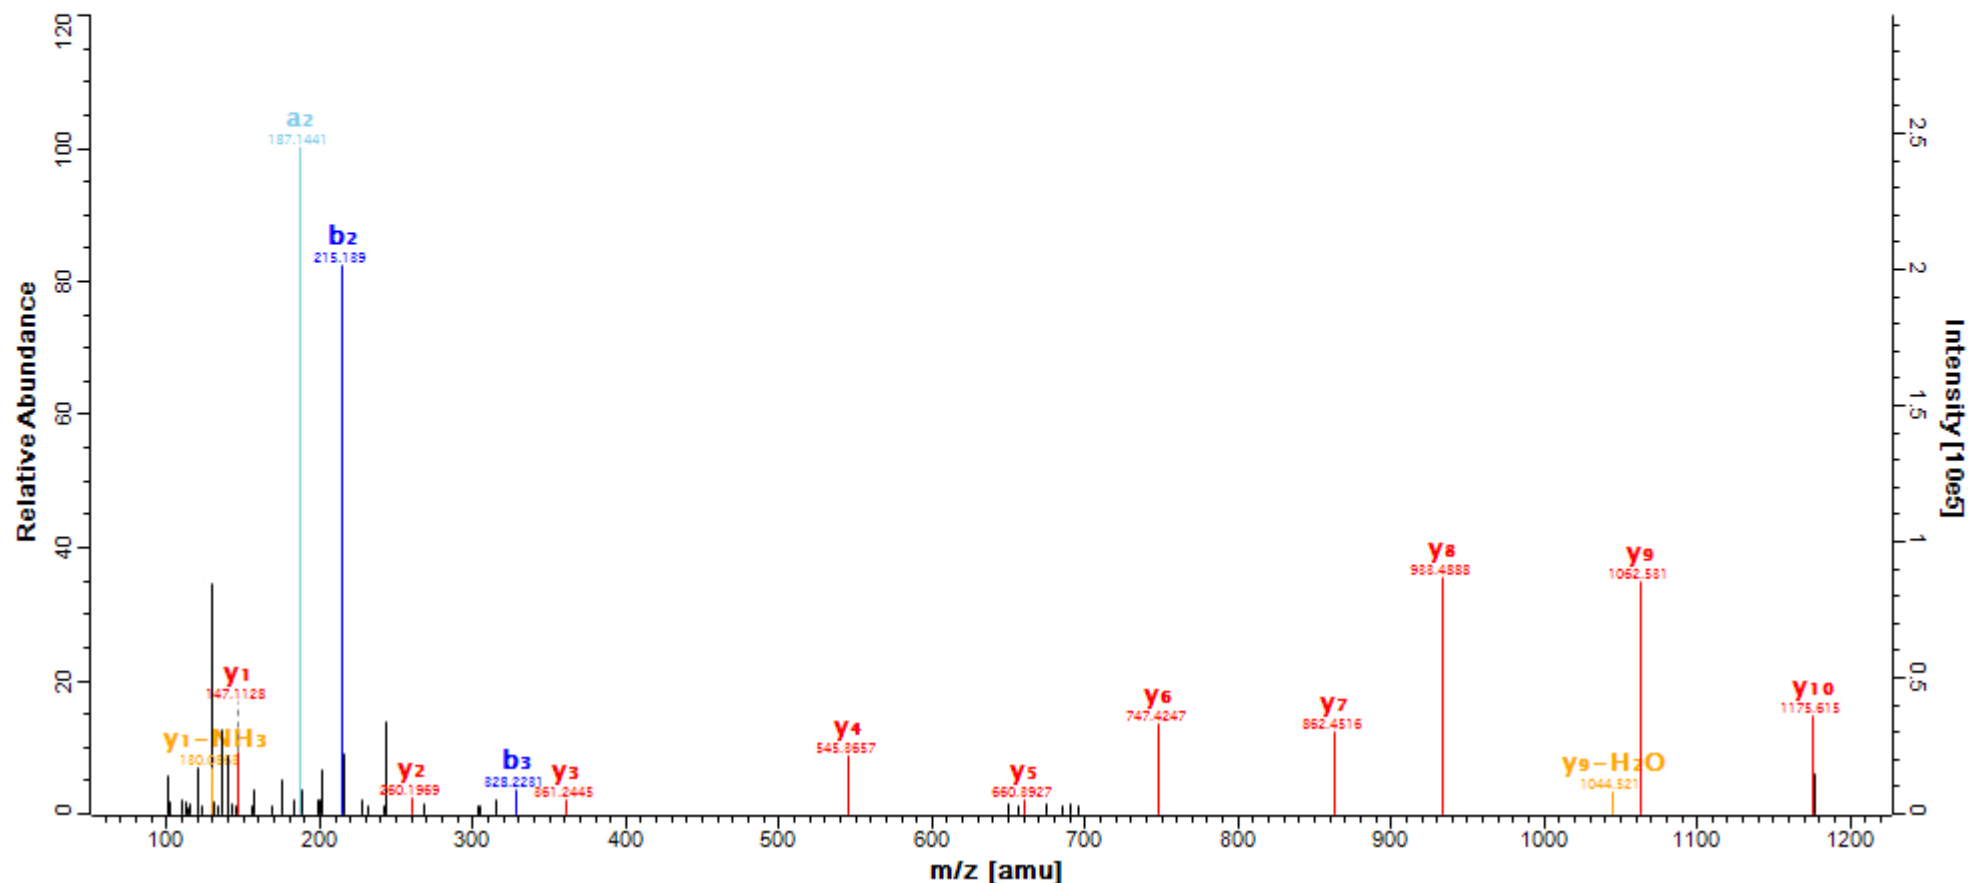



Scan number 5876 Raw file Kprop2  
 Method FTMS; HCD Peptide 71.24

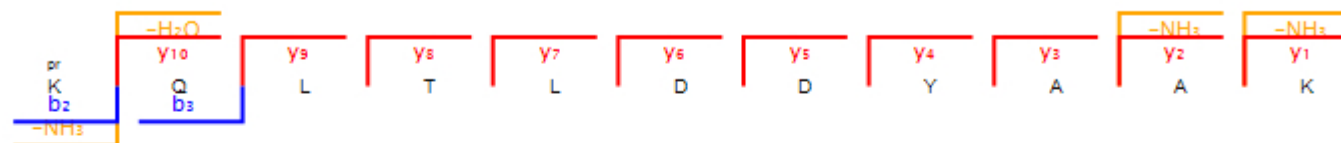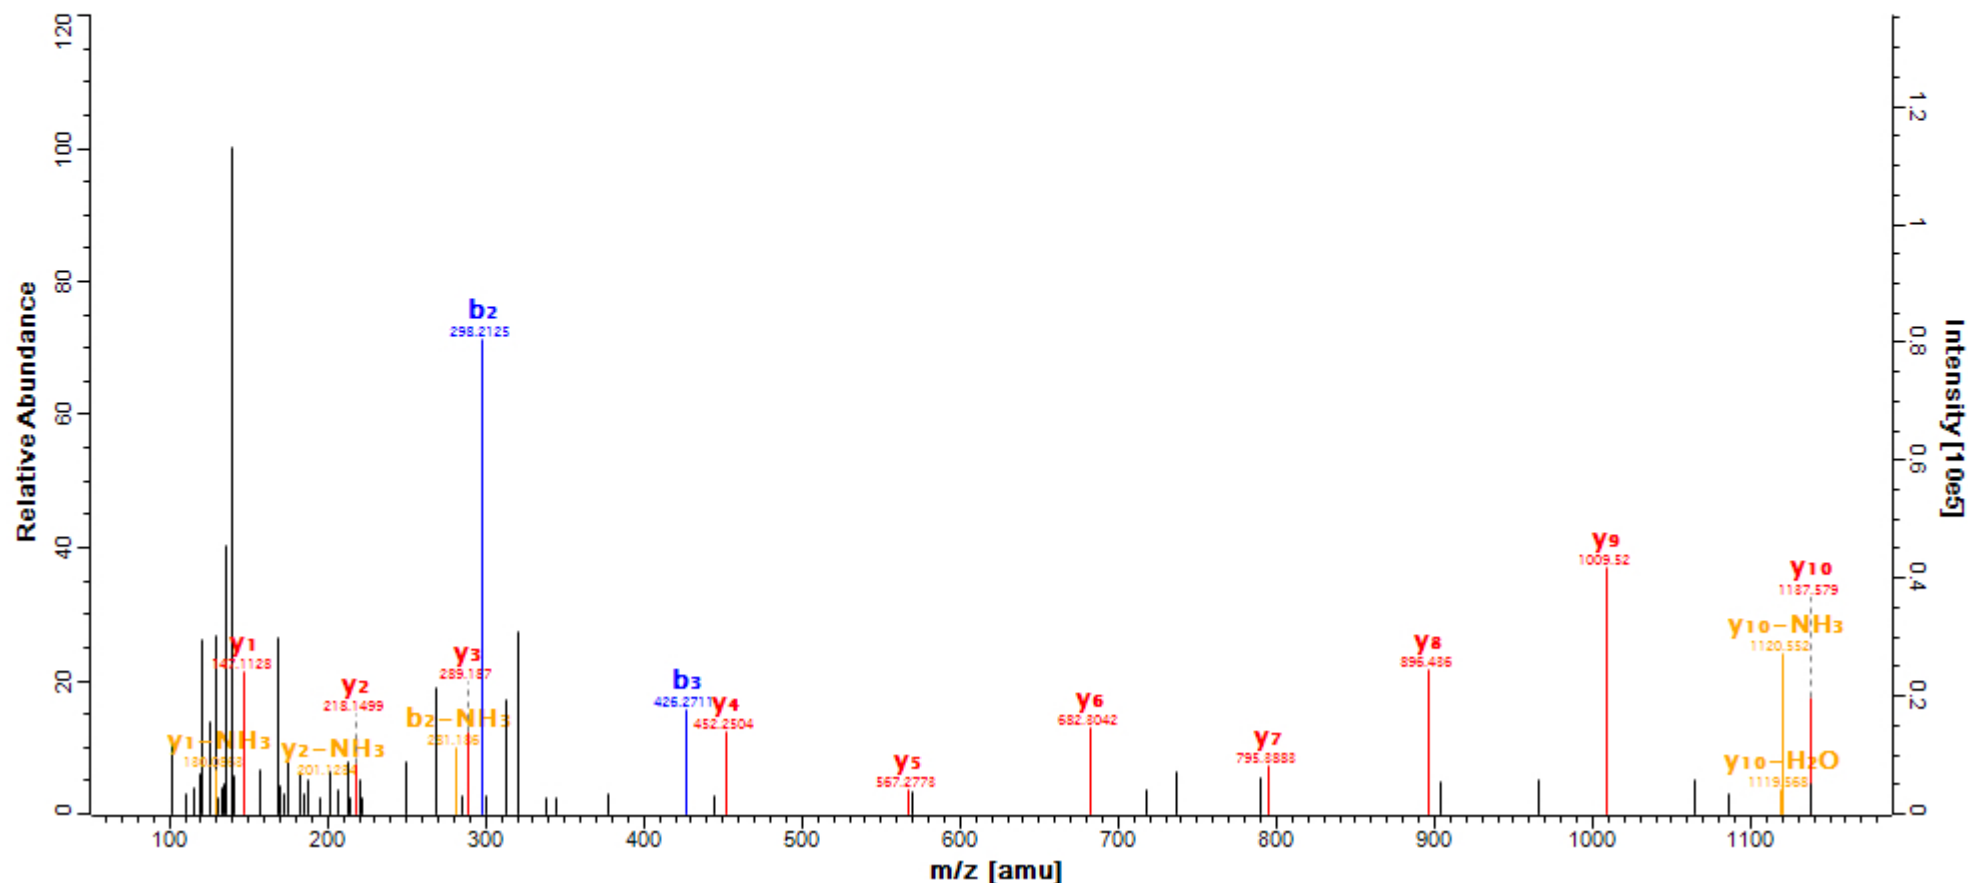

Scan number 6267 Raw file Kprop2  
Method FTMS; HCD Peptide 52.82

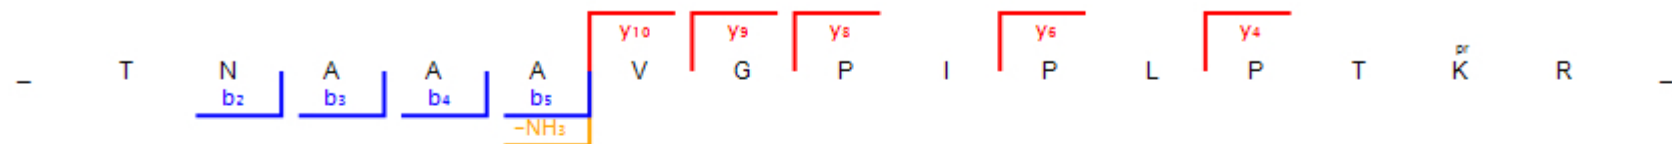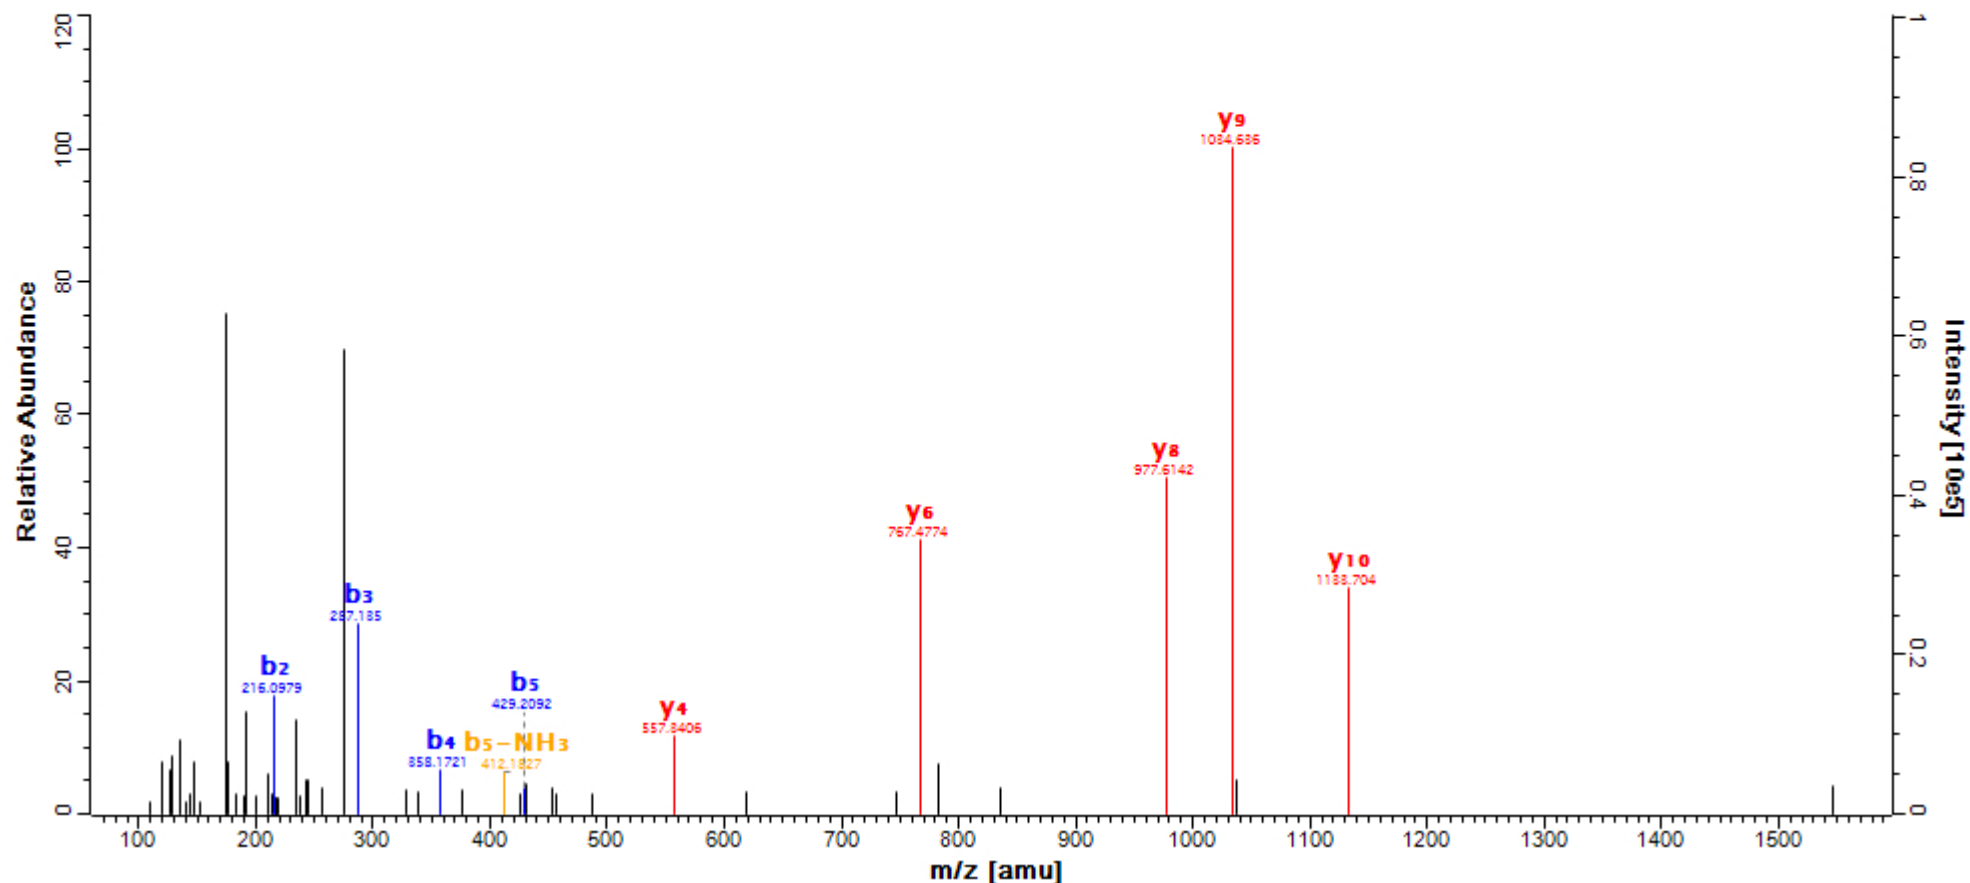

Scan number 6316 Raw file Kprop2  
 Method FTMS; HCD Peptide 59.61

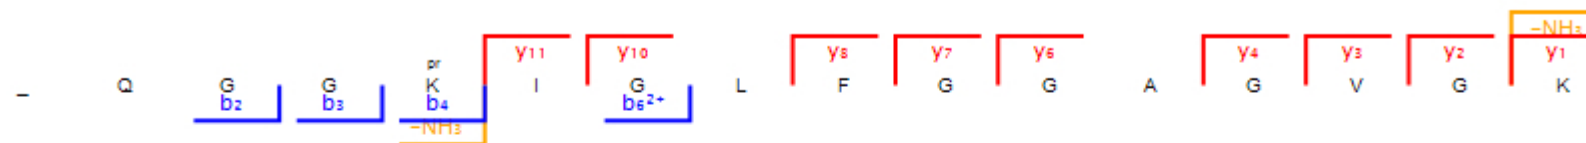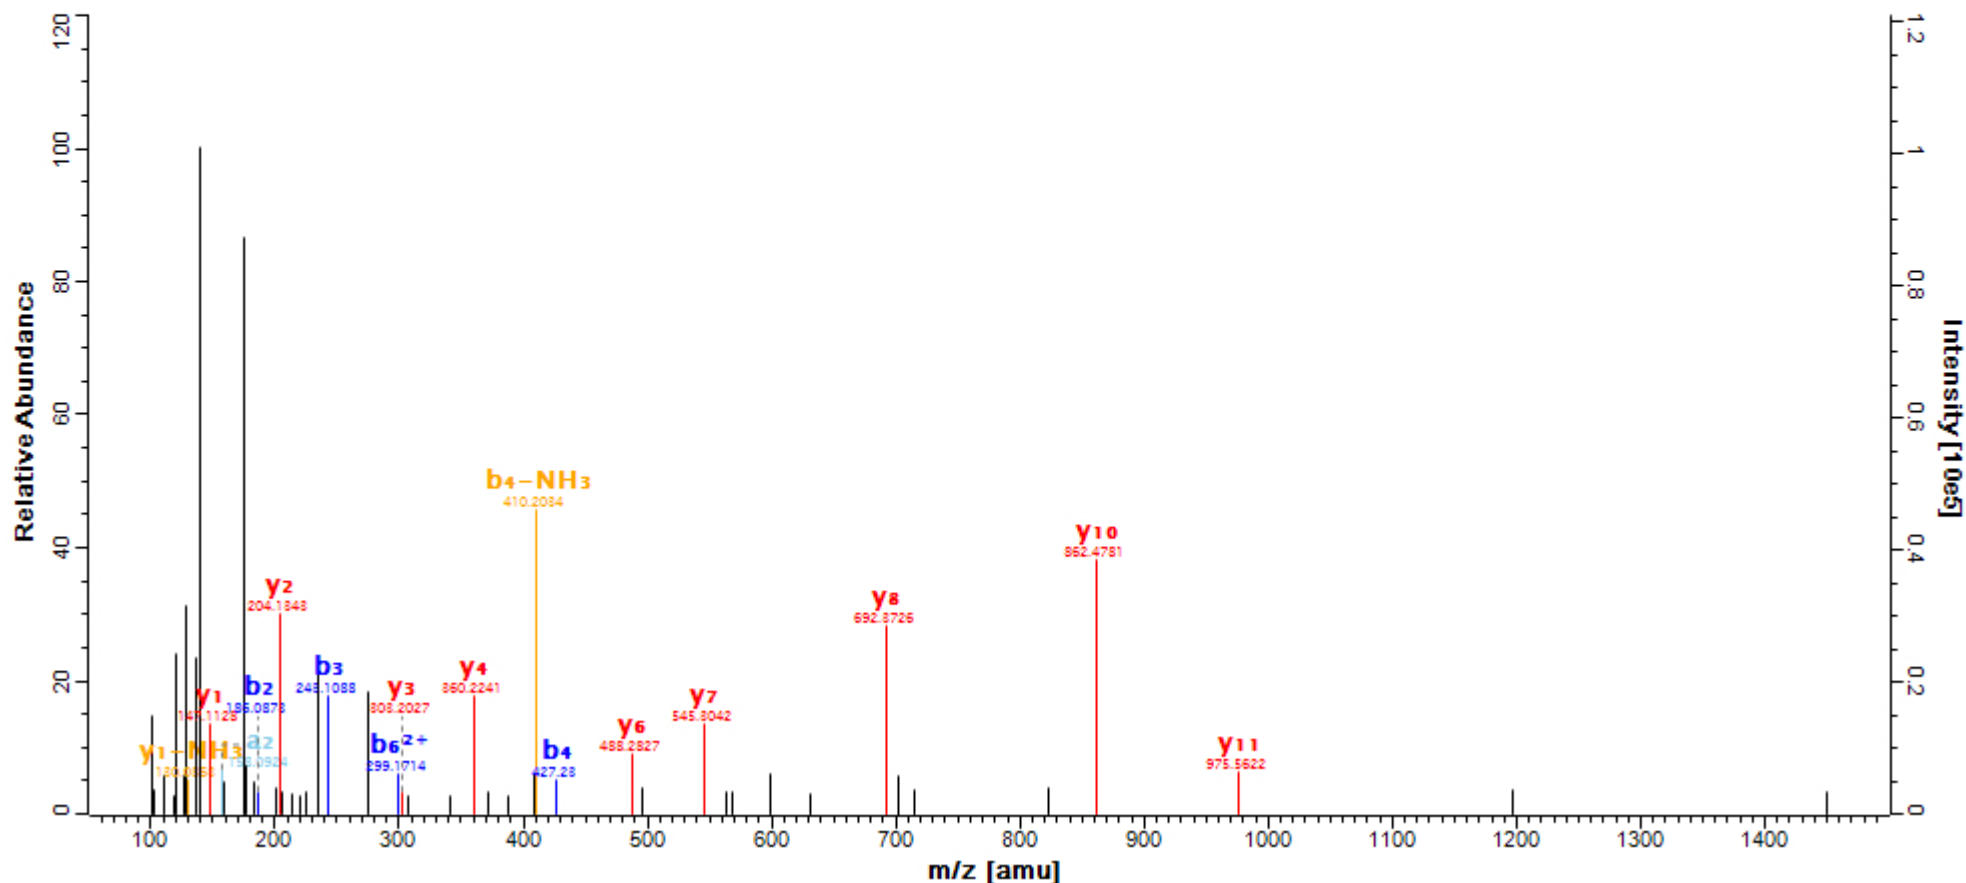

Scan number 6802  
Method FTMS; HCD

Raw file Kprop2  
Peptide 44.81

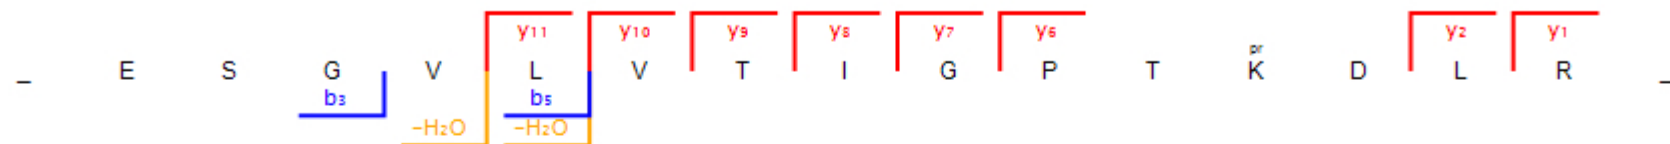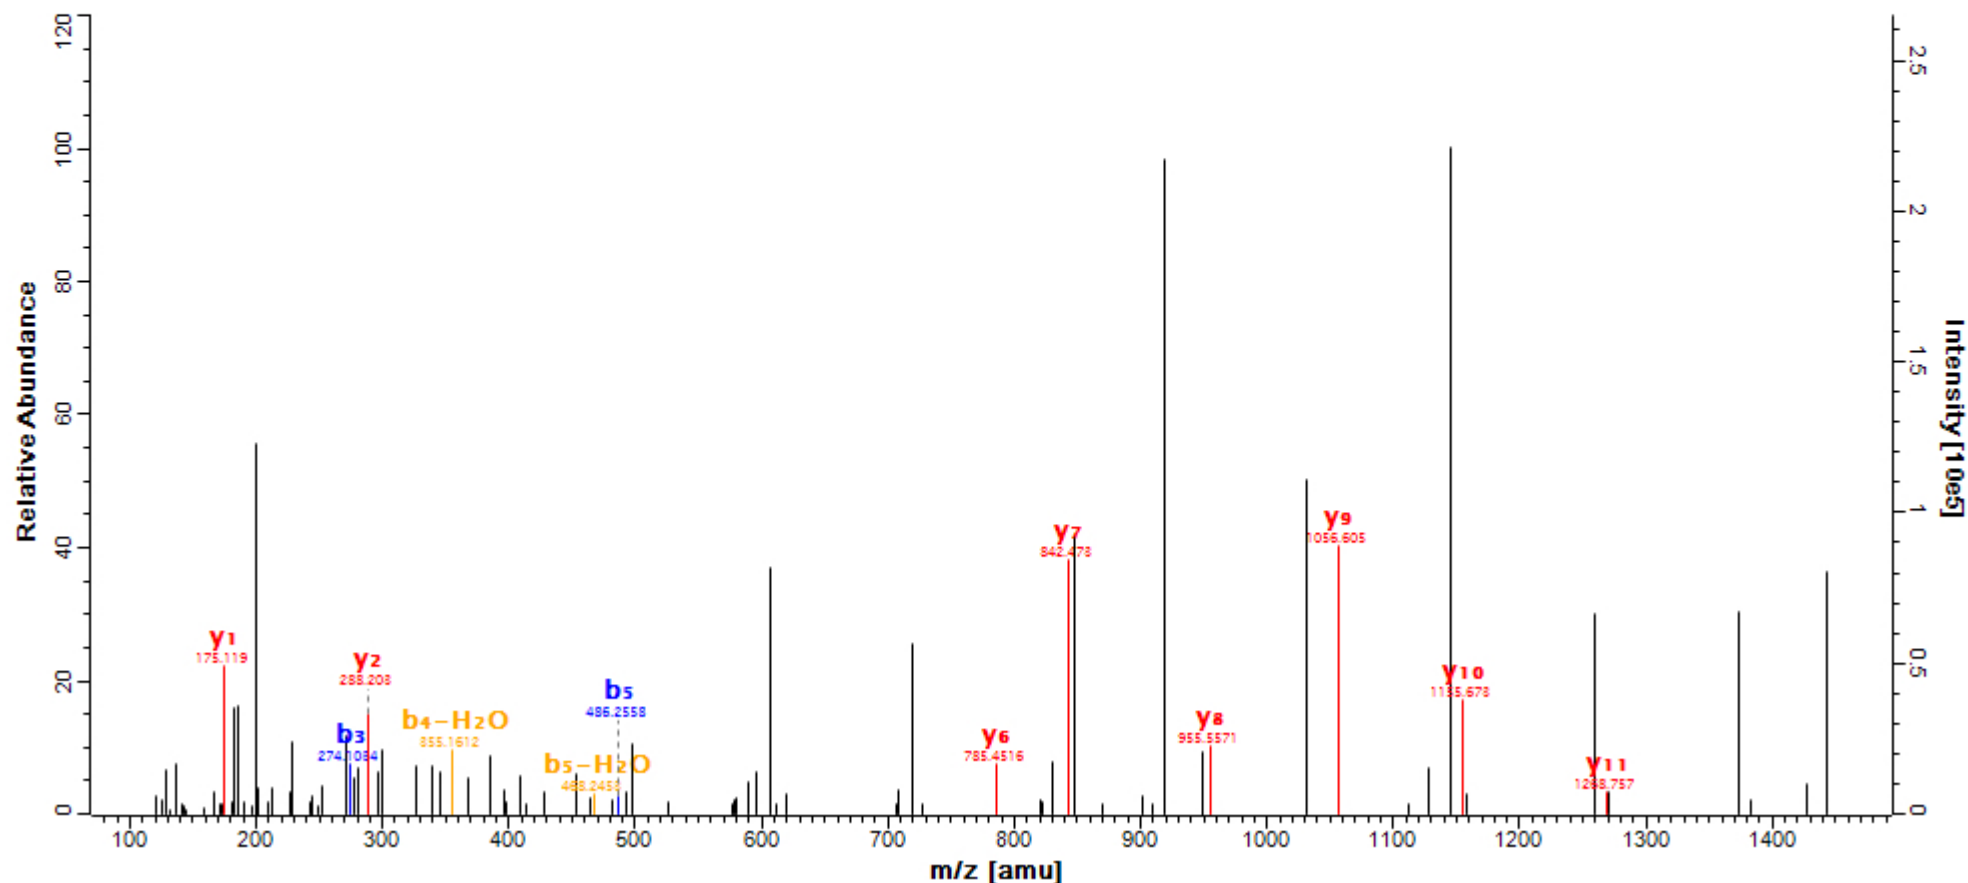

Scan number 7241  
Method FTMS; HCD

Raw file Kprop2  
Peptide 166.14

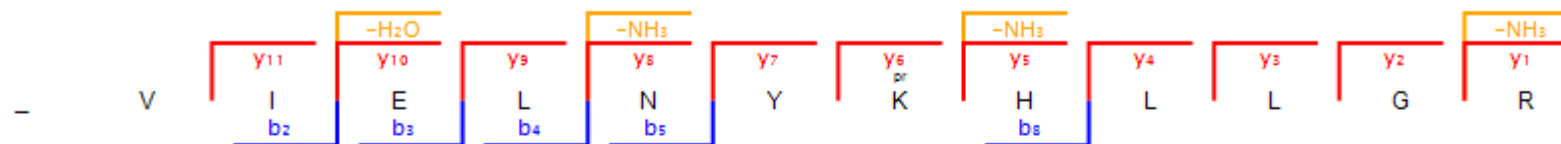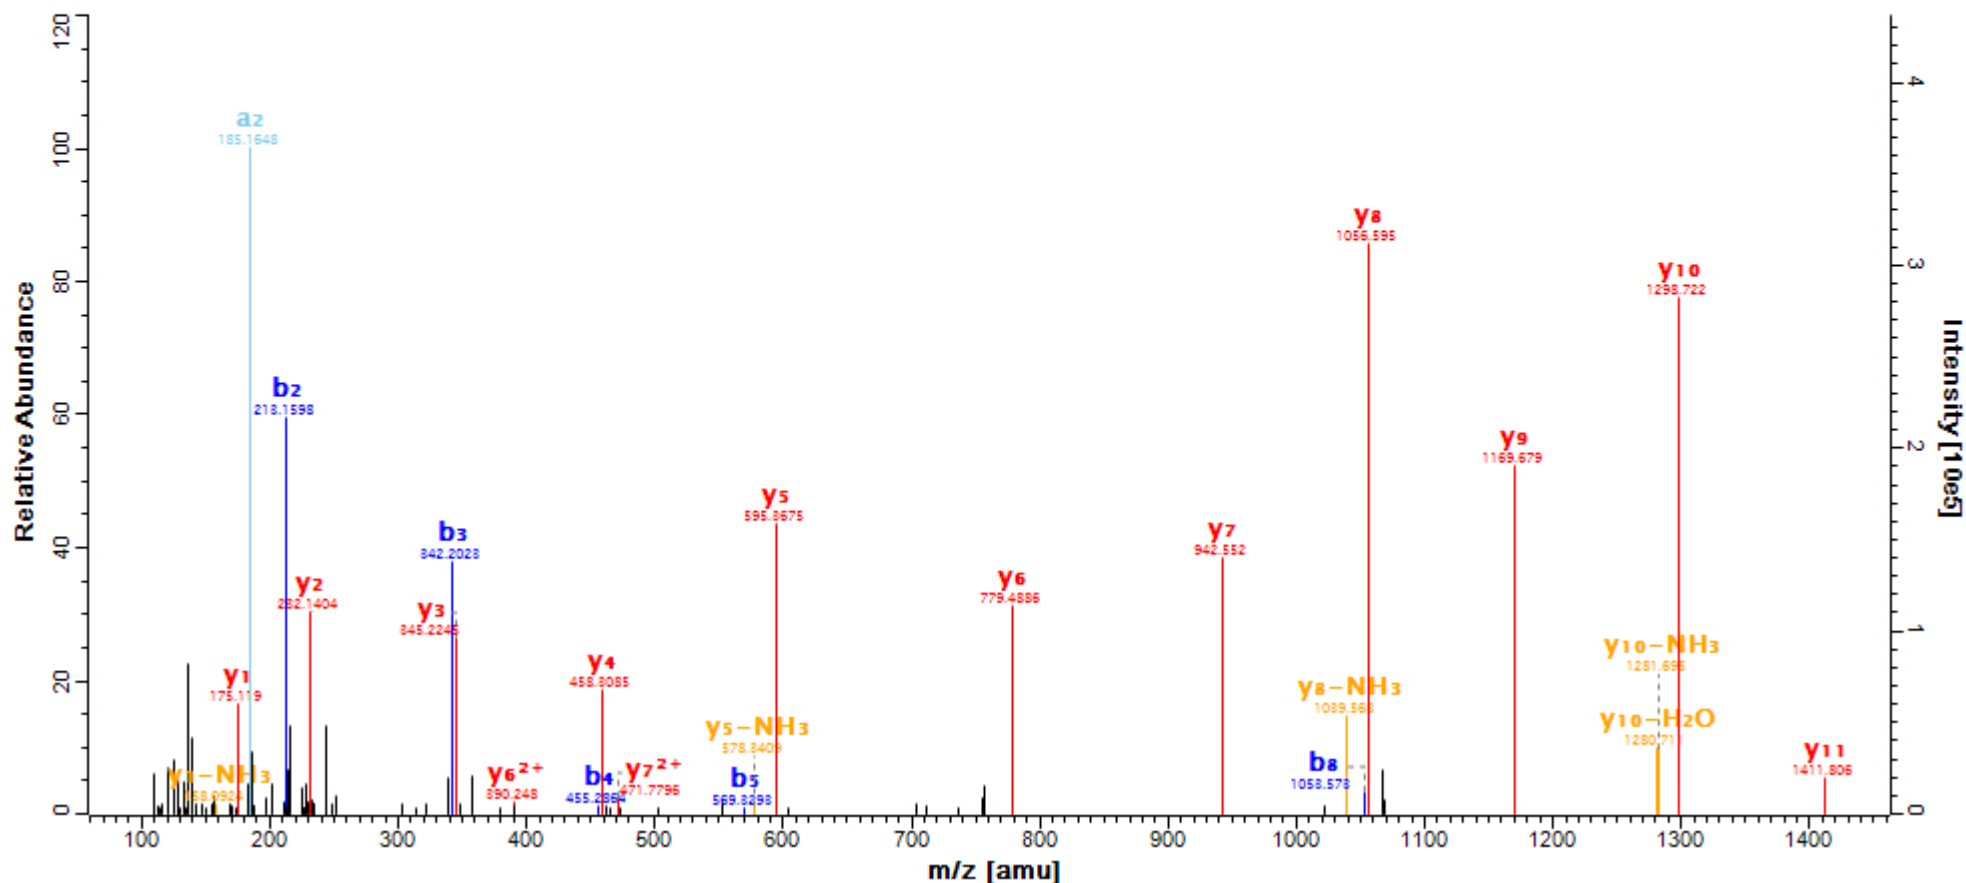

Scan number 7287 Raw file Kprop2  
Method FTMS; HCD Peptide 106.17

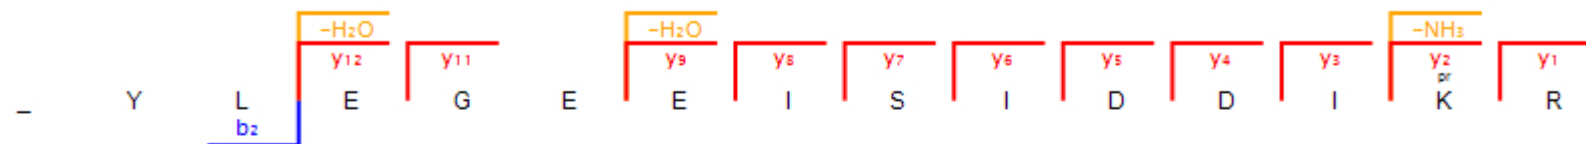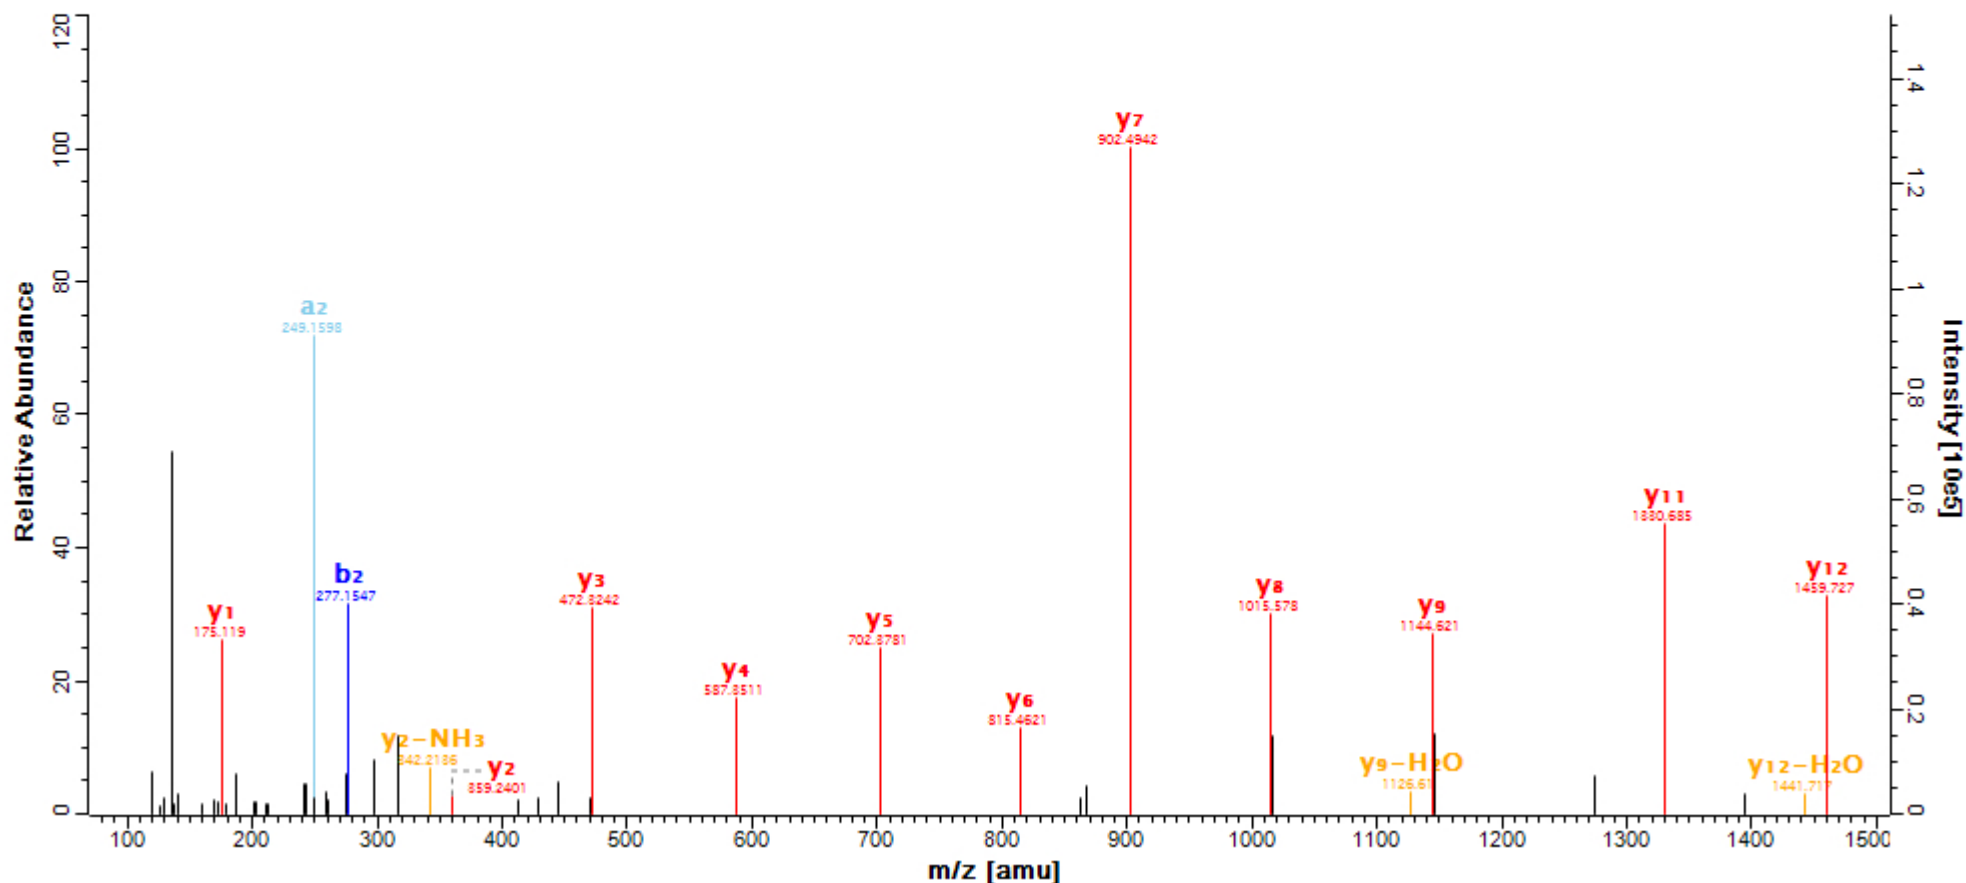

|             |           |          |        |
|-------------|-----------|----------|--------|
| Scan number | 7631      | Raw file | Kprop2 |
| Method      | FTMS; HCD | Peptide  | 104.63 |

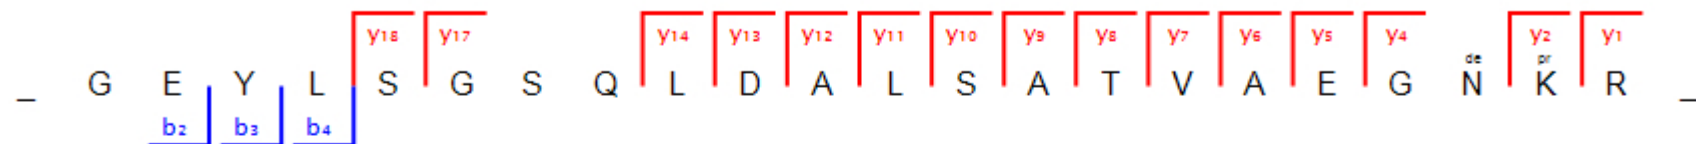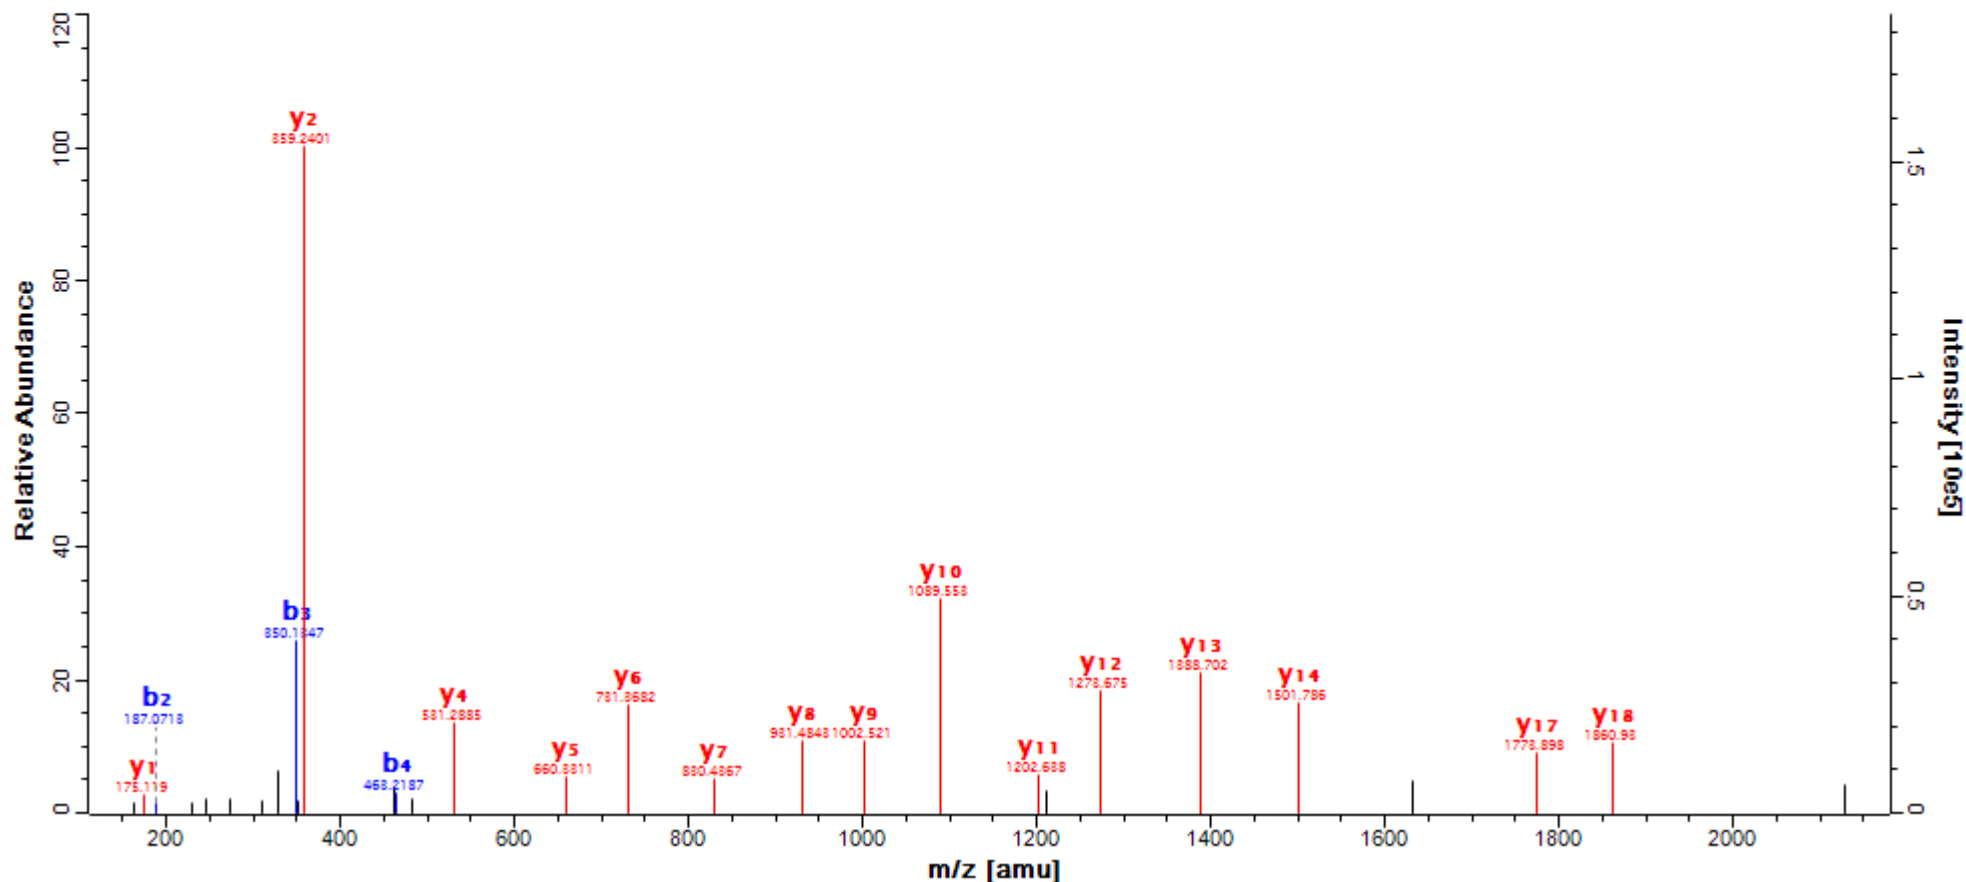

Scan number 7890 Raw file Kprop2  
 Method FTMS; HCD Peptide 87.18

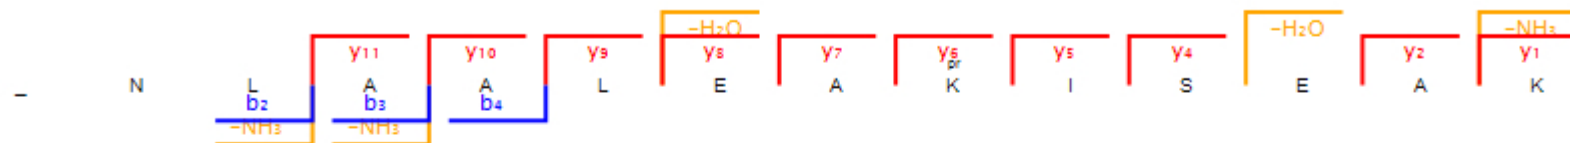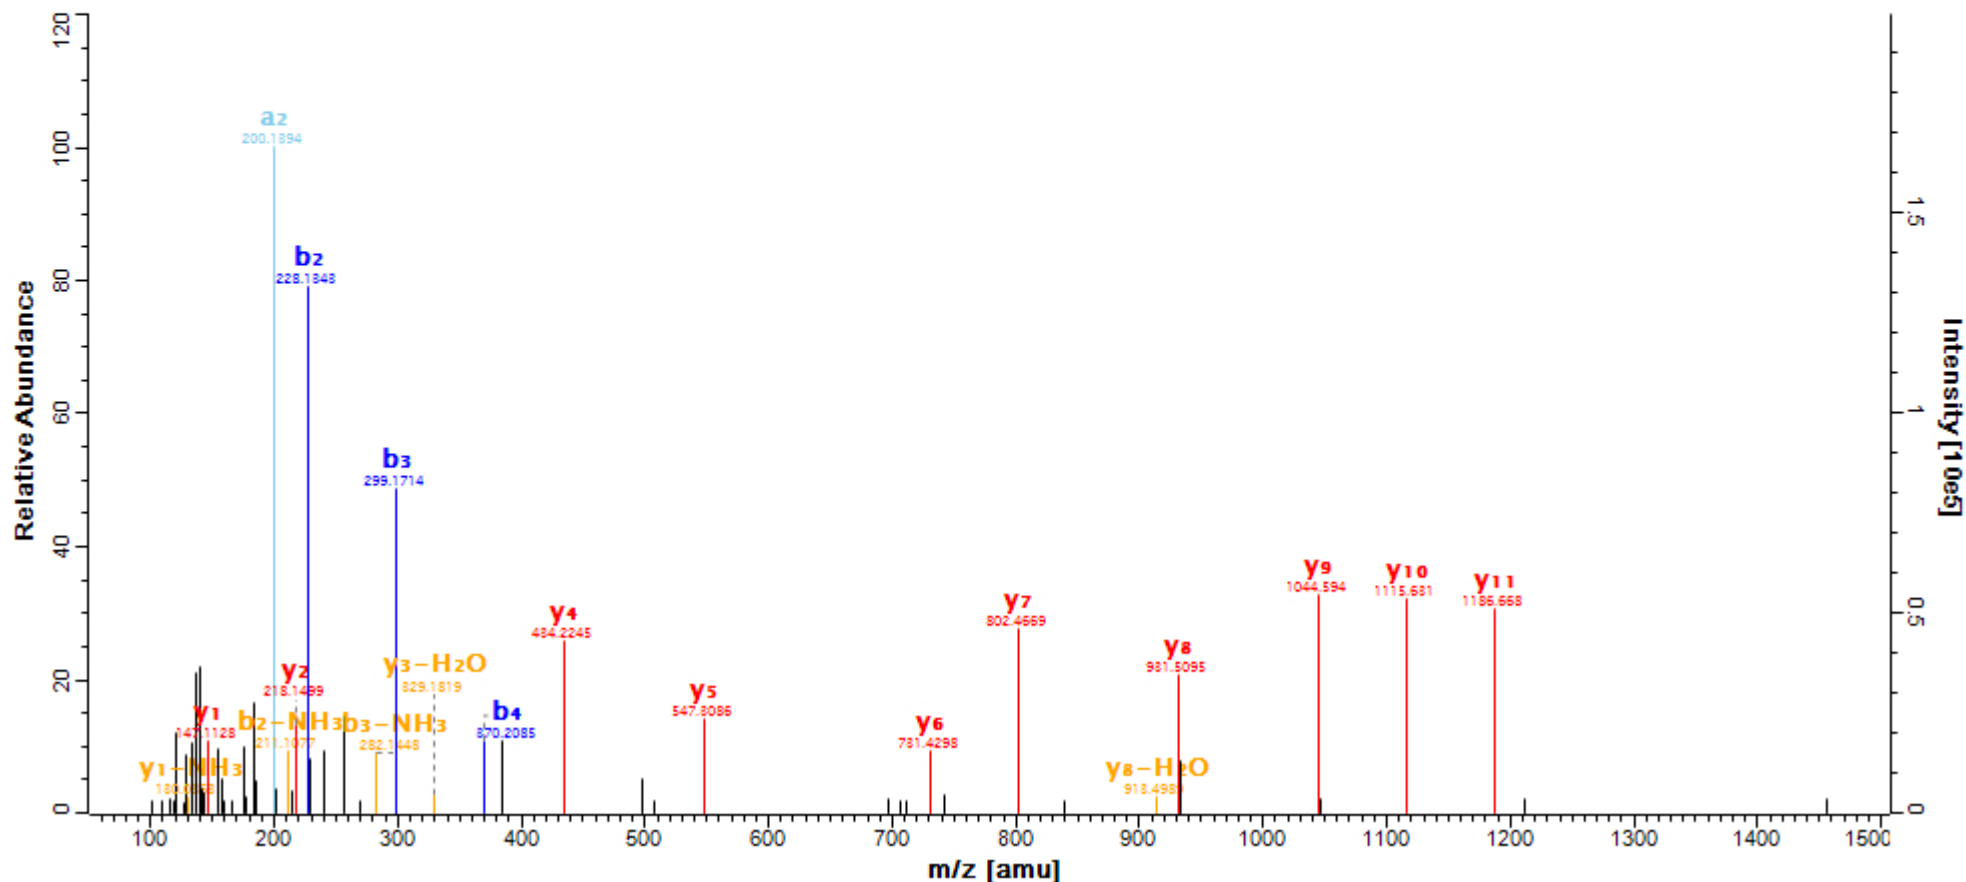



Scan number 1912  
Method FTMS; HCD

Raw file Kprop3  
Peptide 88.68

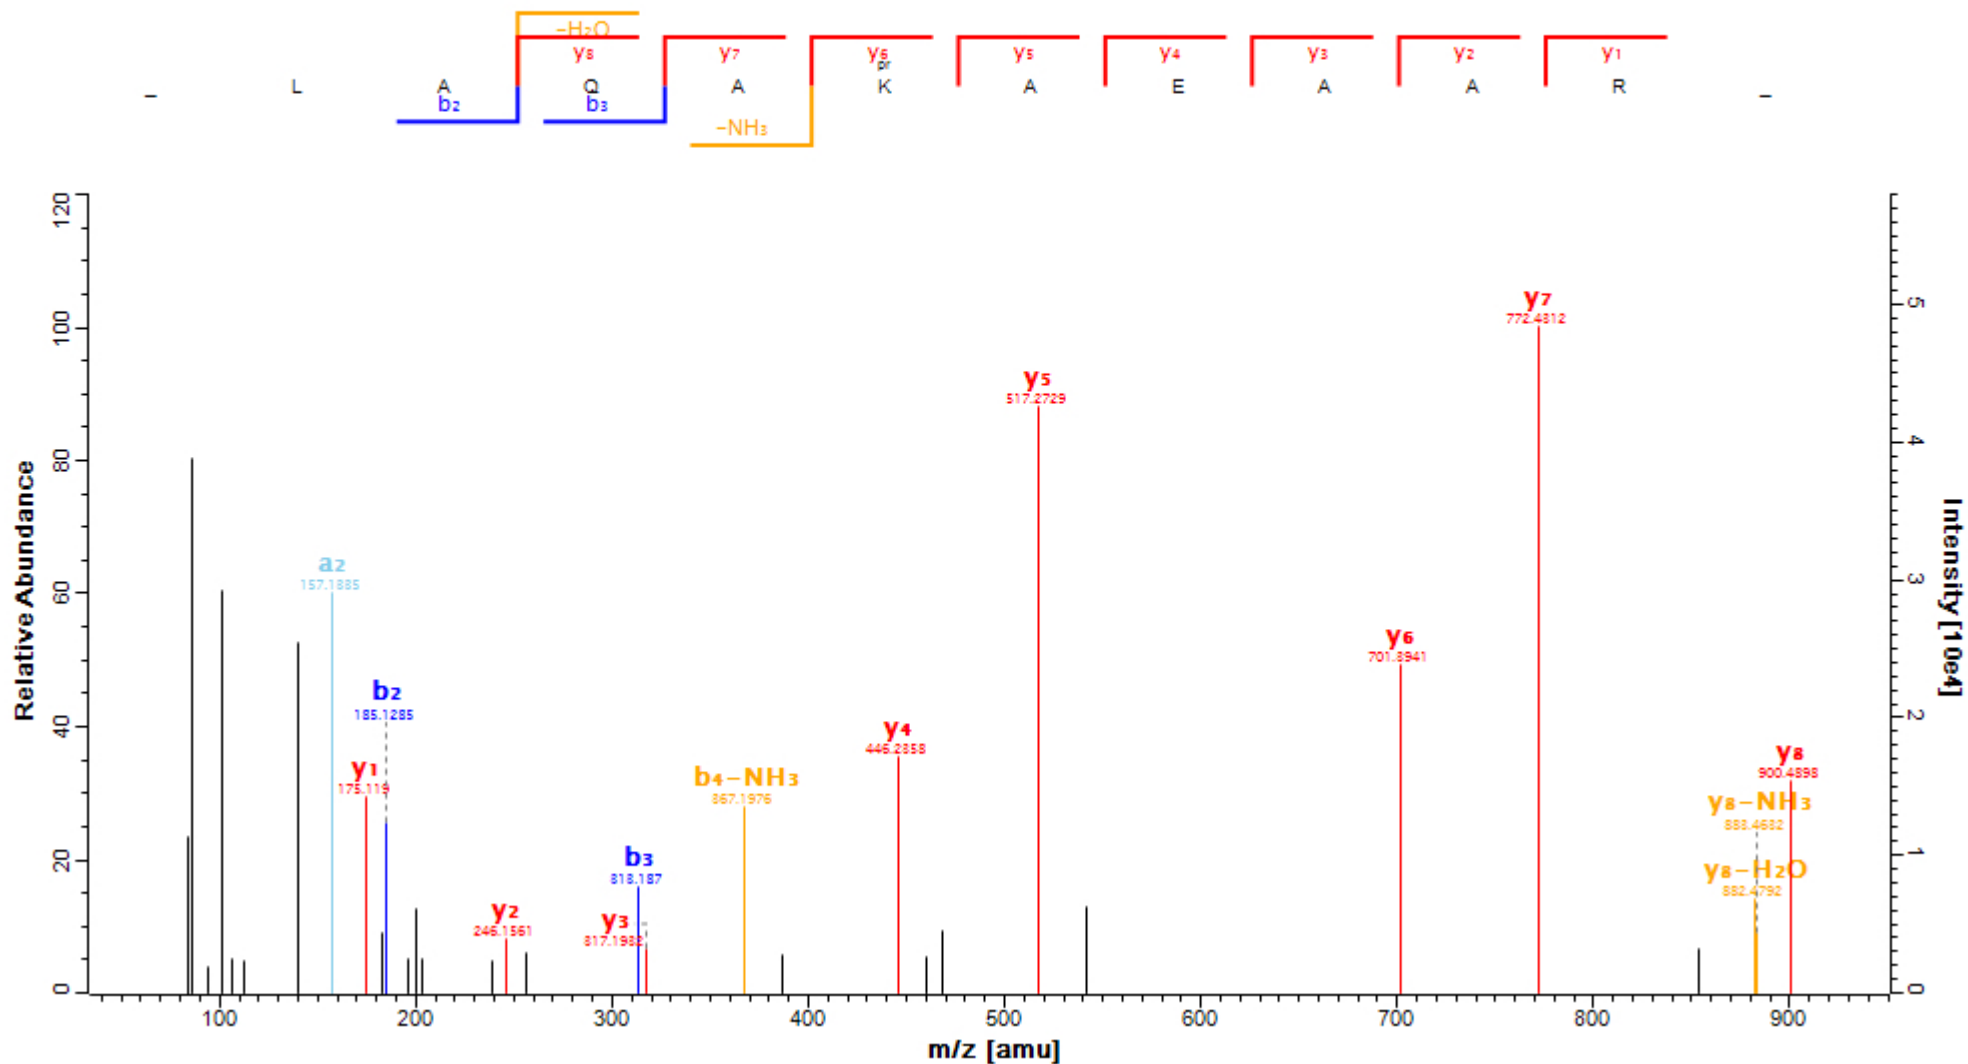

|             |           |          |        |
|-------------|-----------|----------|--------|
| Scan number | 2054      | Raw file | Kprop3 |
| Method      | FTMS; HCD | Pepti... | 82.17  |

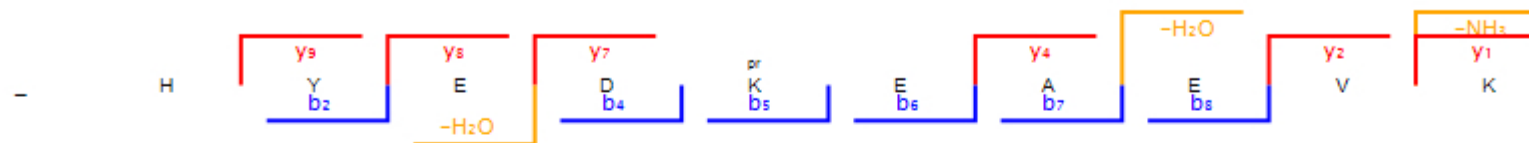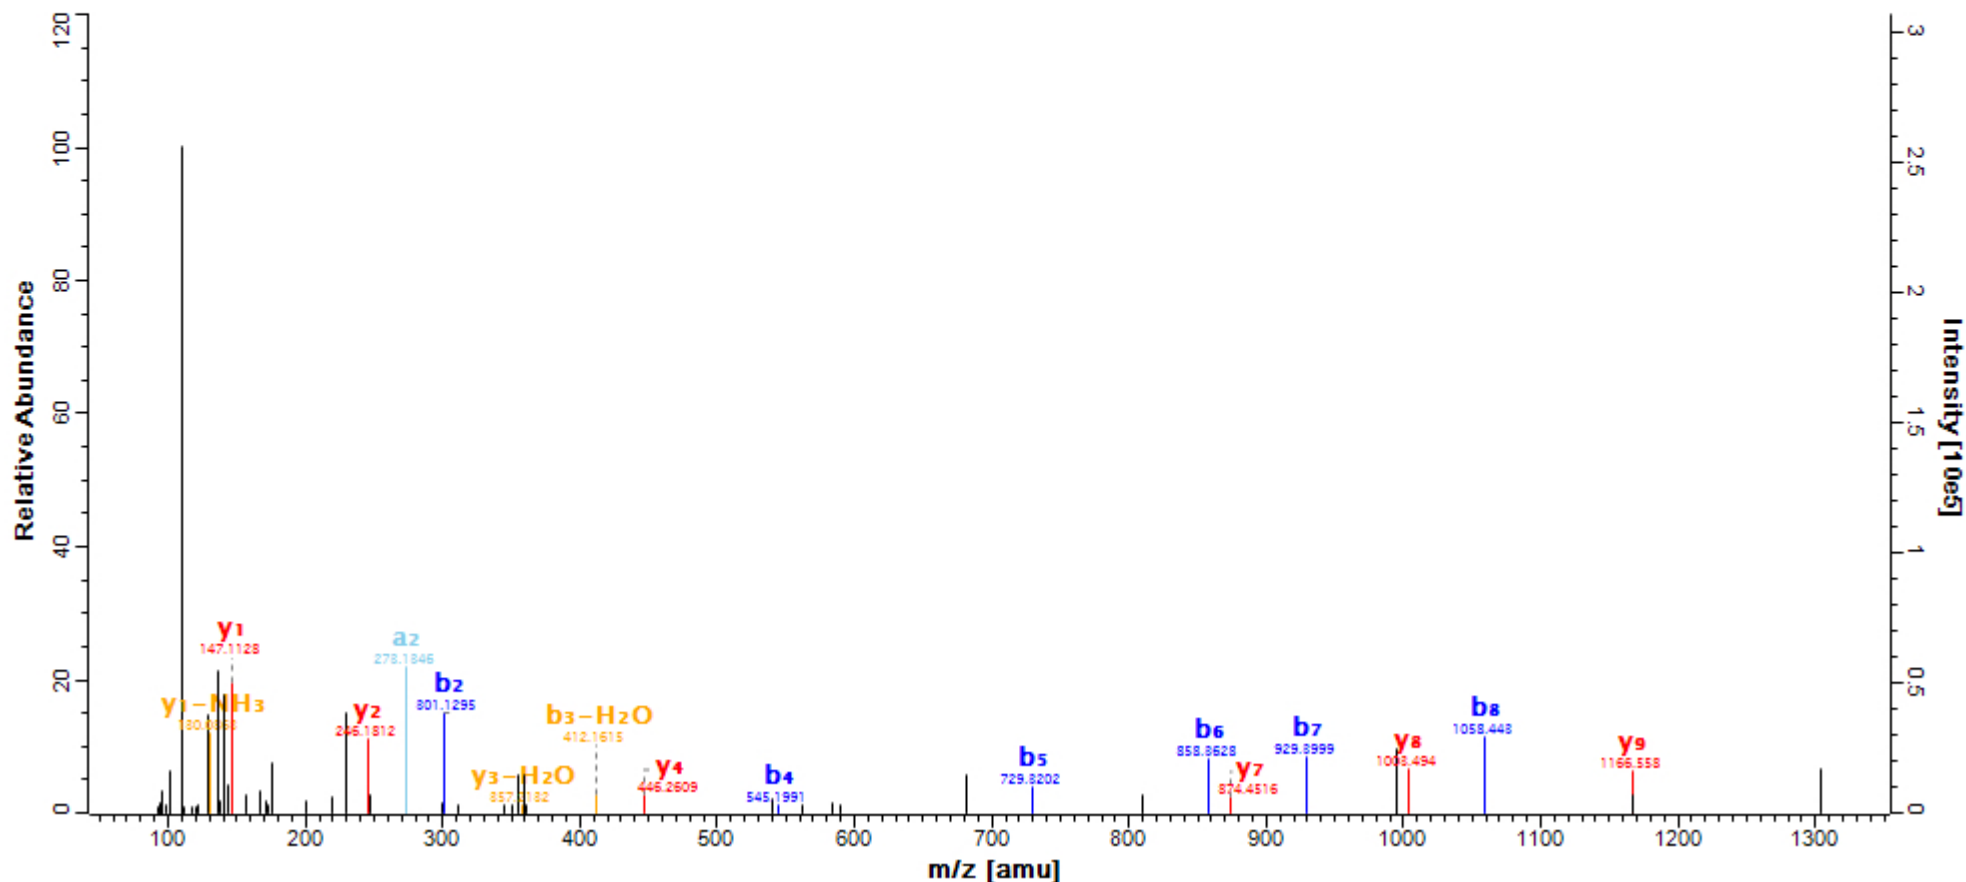

Scan number 2649 Raw file Kprop3  
 Method FTMS; HCD Peptide 91.86

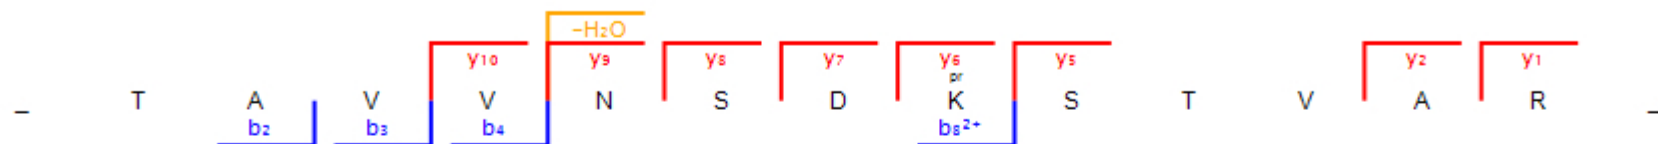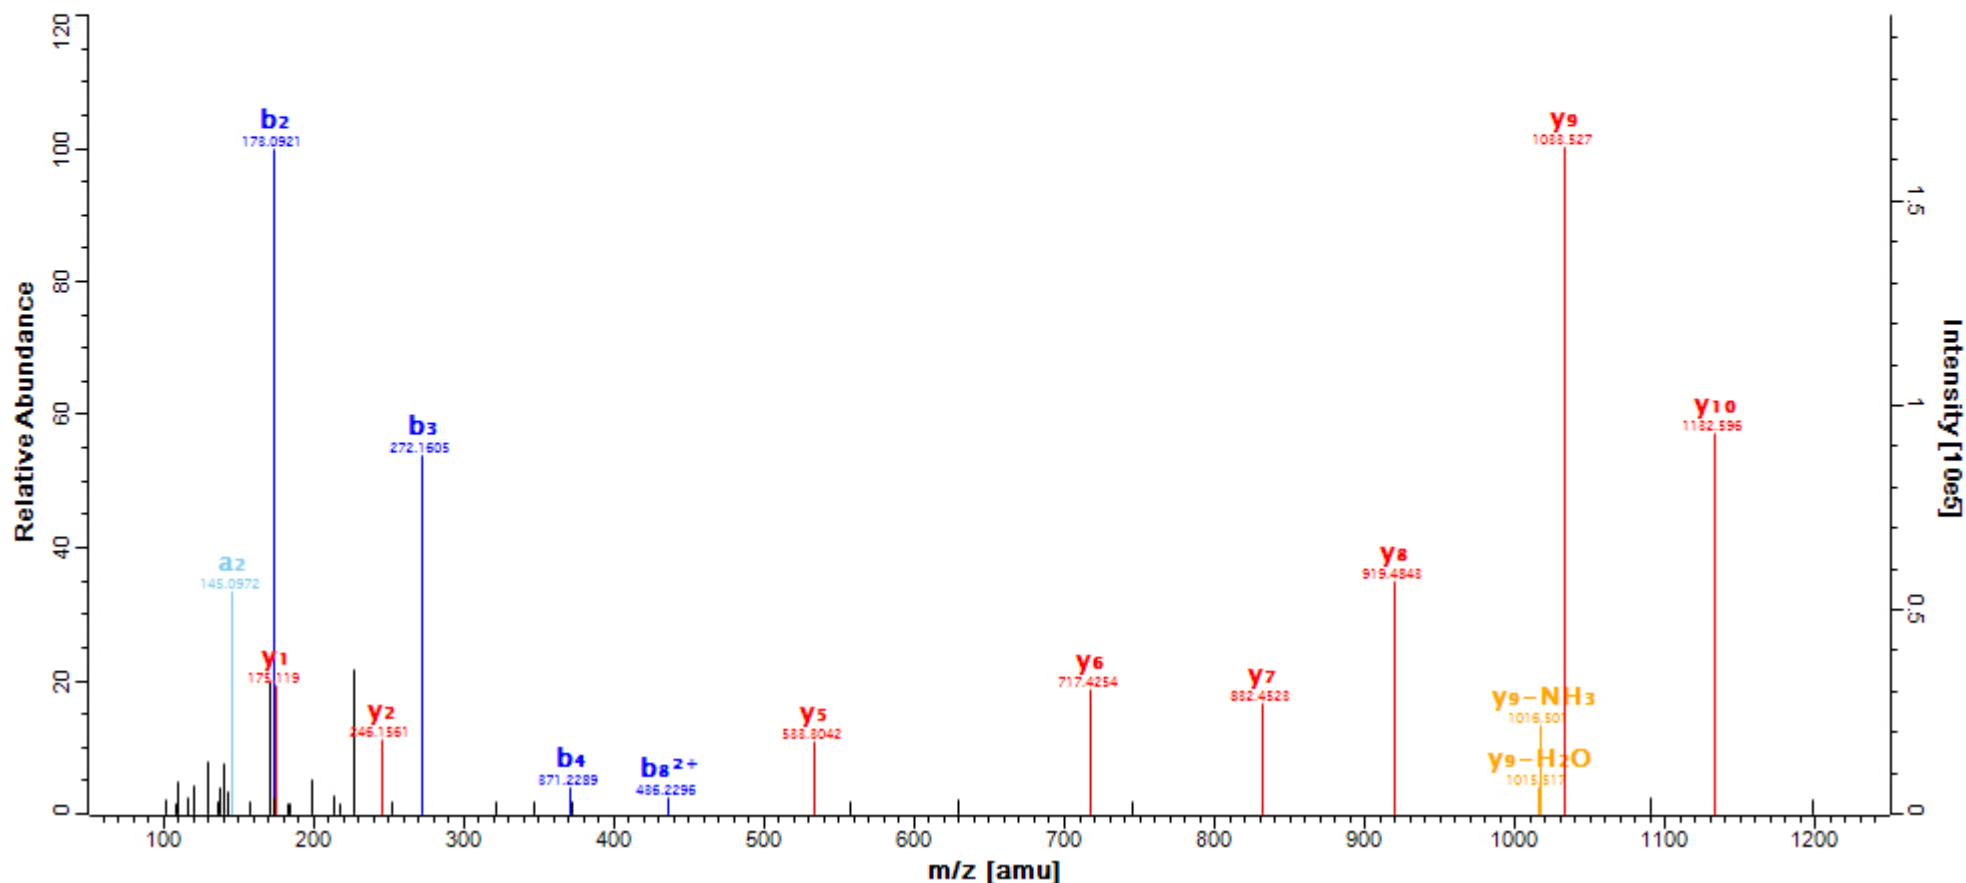

Scan number 4046  
Method FTMS; HCD

Raw file Kprop3  
Peptide 76.93

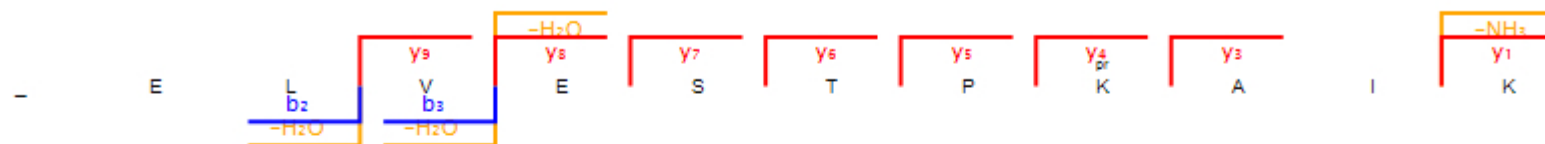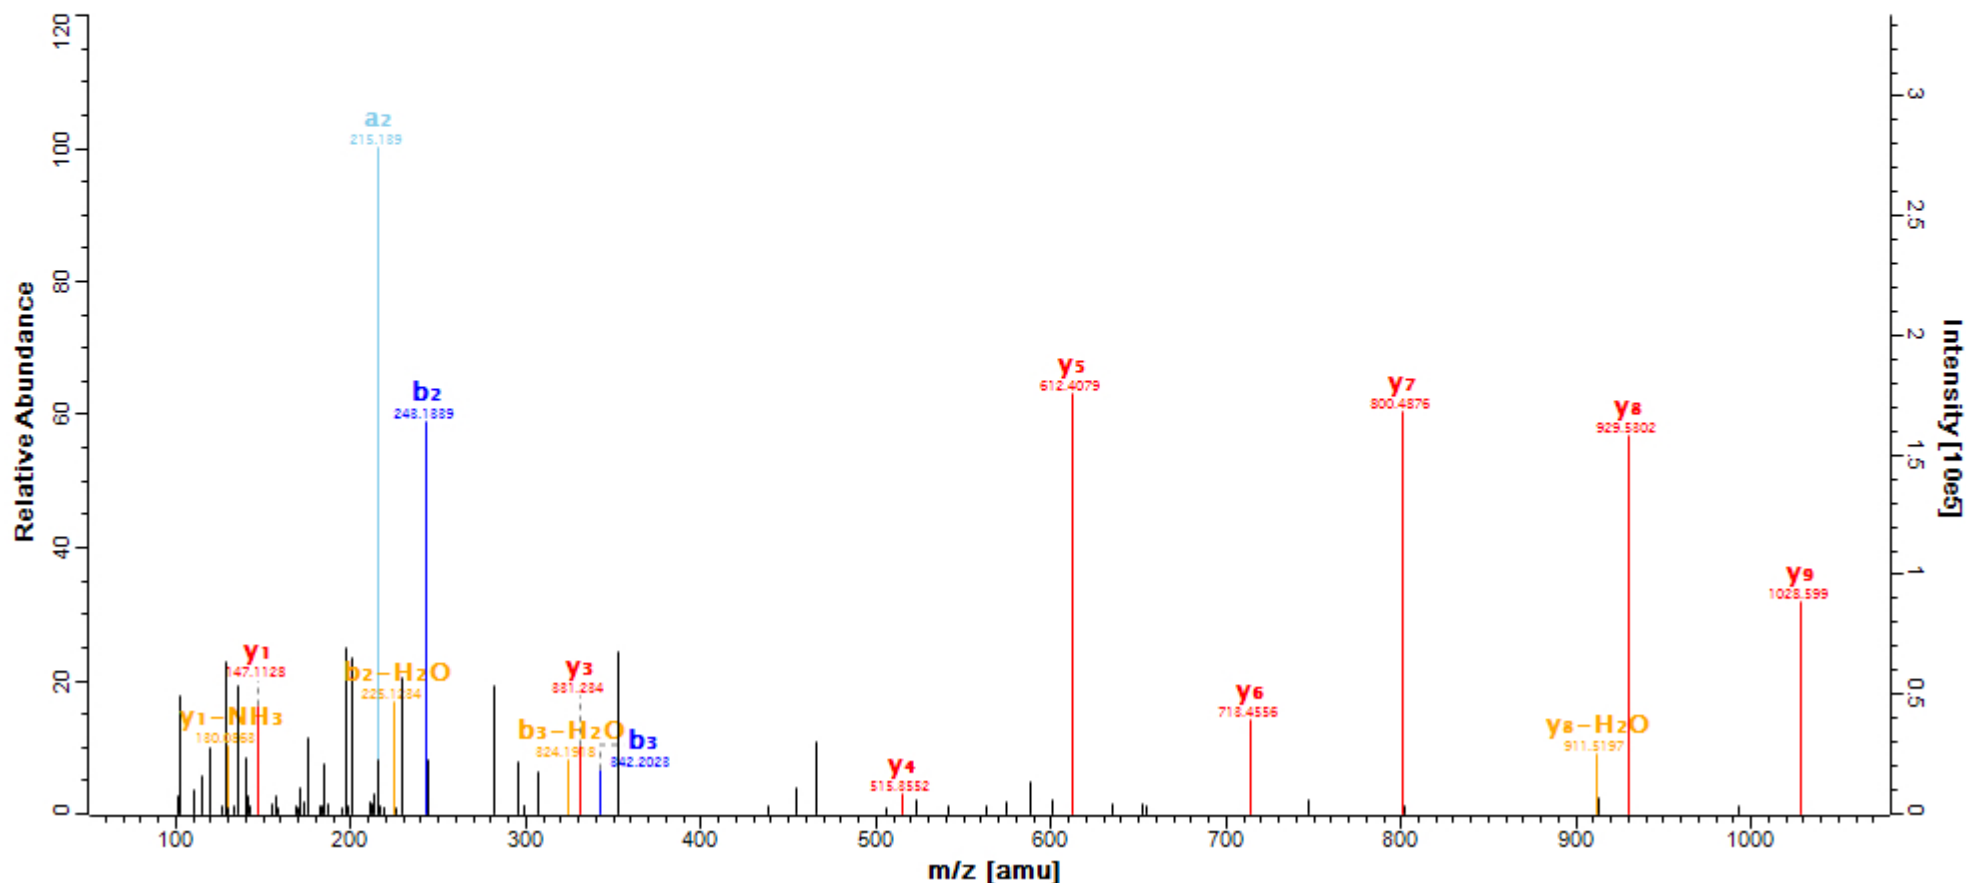

Scan number 4850  
Method FTMS; HCD

Raw file Kprop3  
Peptide 178.77

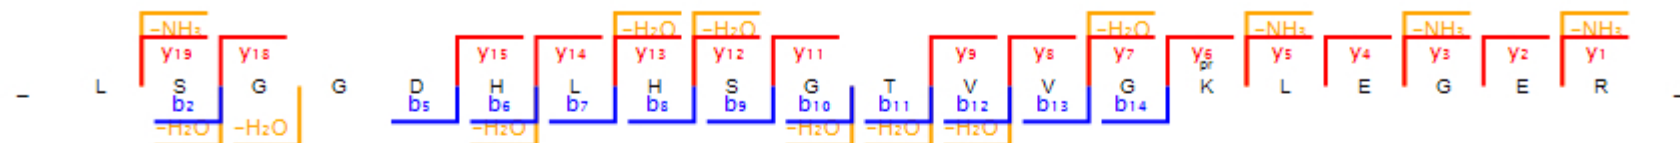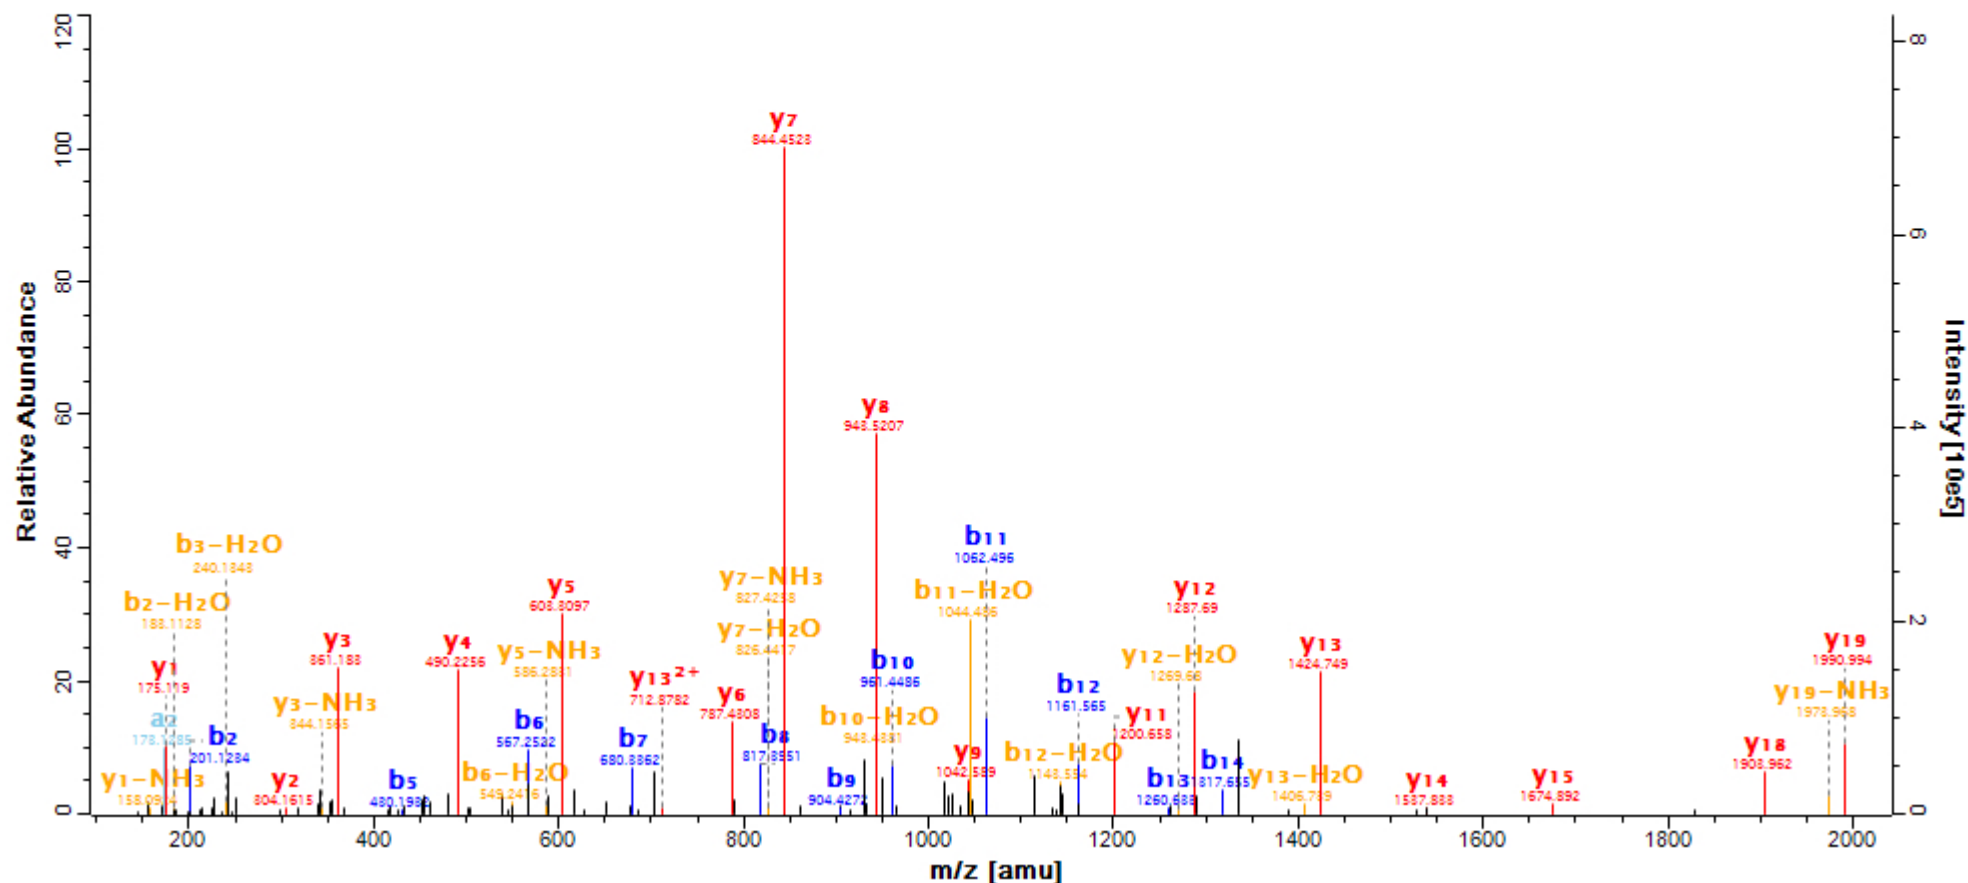

Scan number 5953 Raw file Kprop3  
 Method FTMS; HCD Peptide 175.45

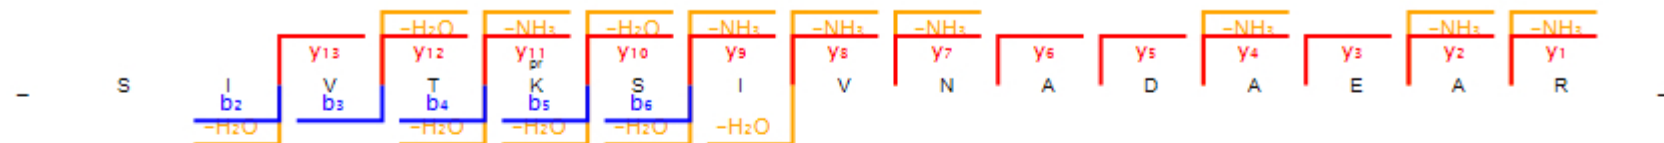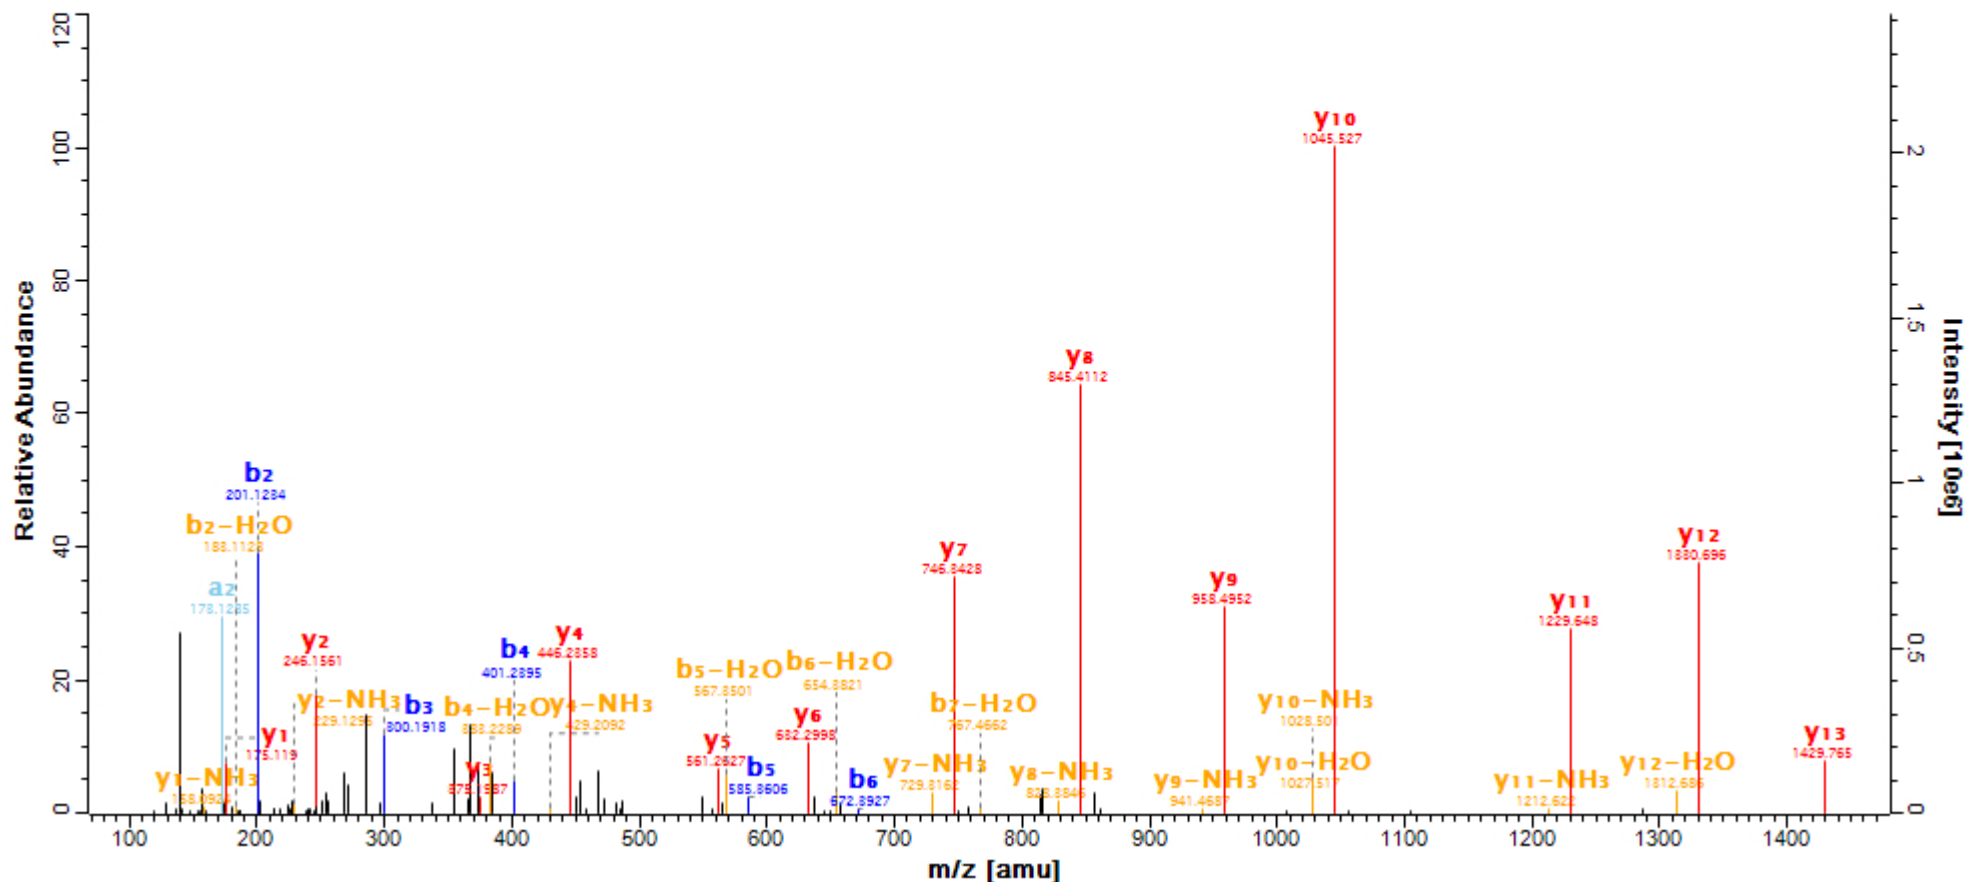

Scan number 6428 Raw file Kprop3  
Method FTMS; HCD Peptide 130.56

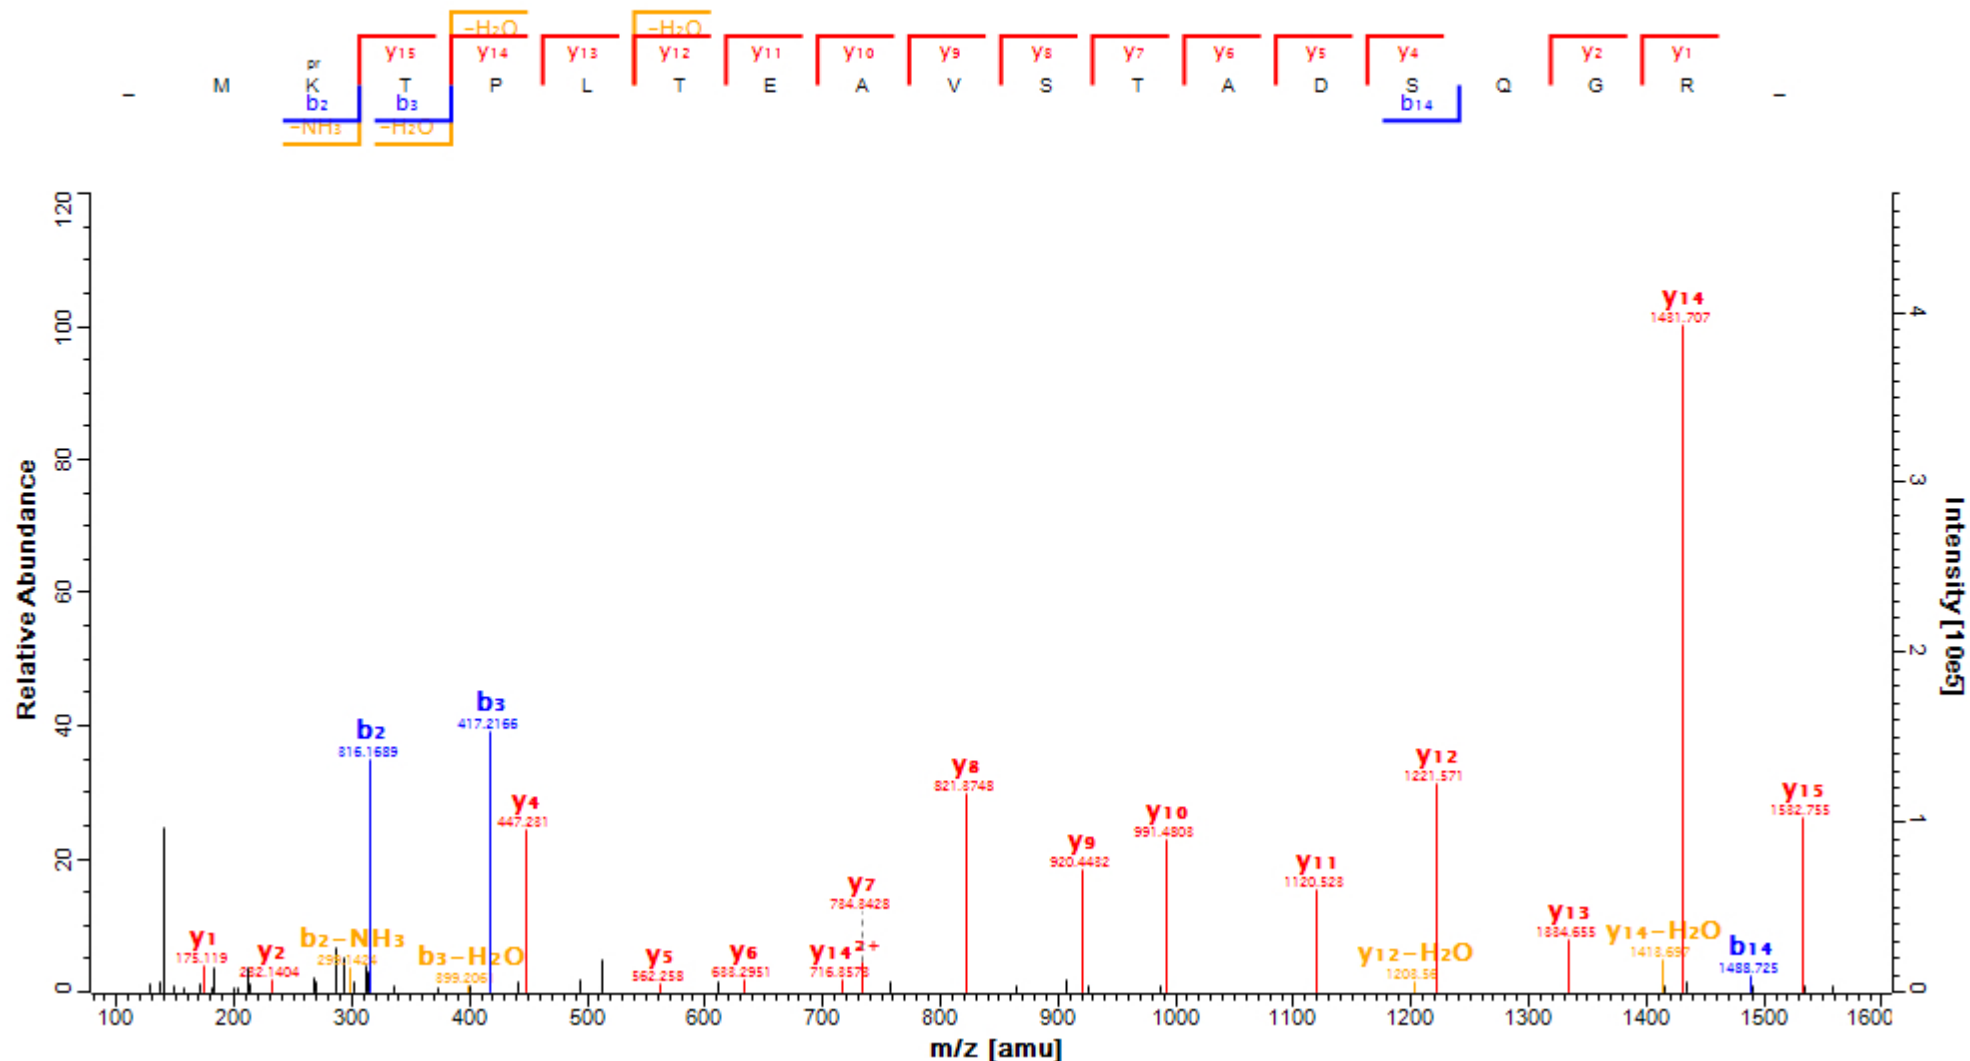

Scan number 6586  
Method FTMS; HCD

Raw file Kprop3  
Peptide 102.66

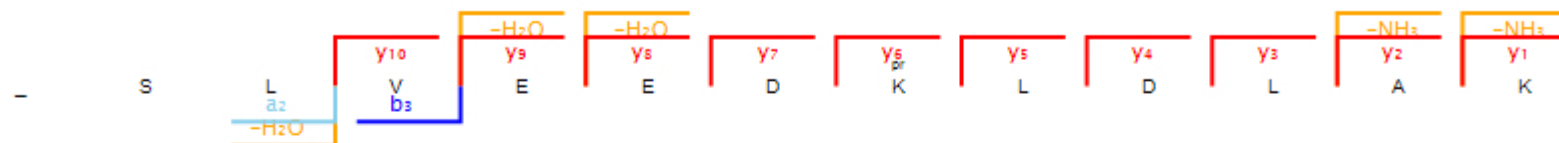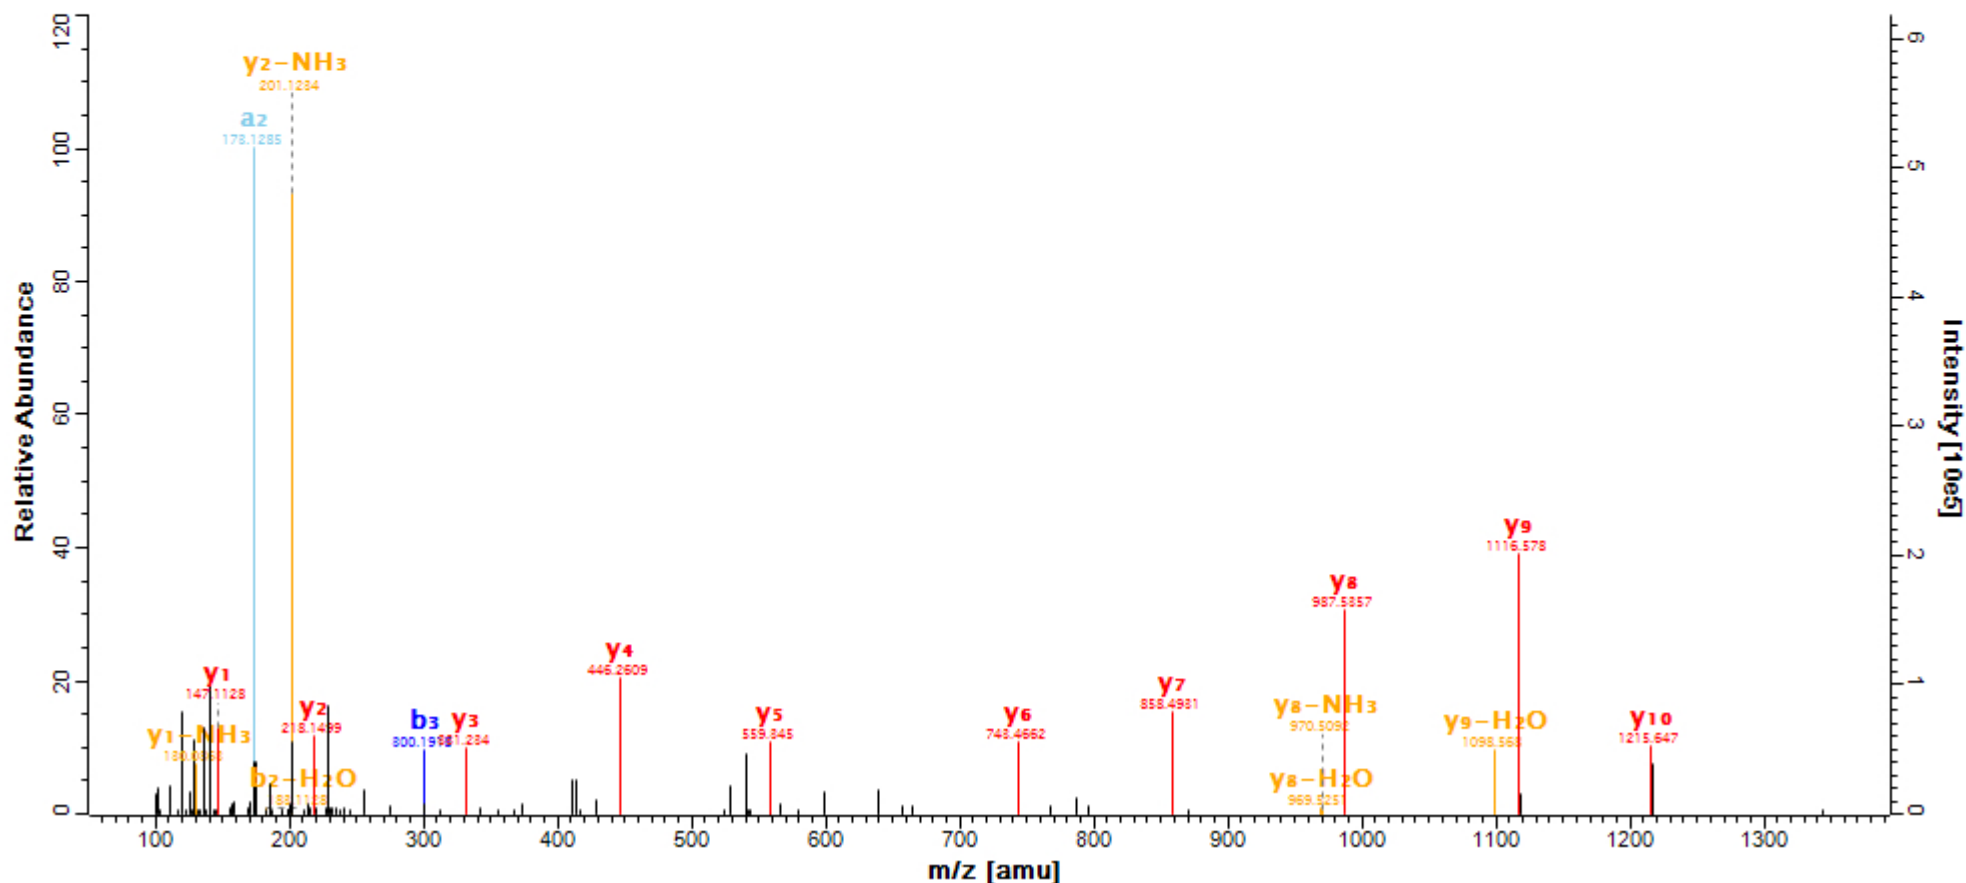



Scan number 6668  
Method FTMS; HCD

Raw file Kprop3  
Peptide 105.16

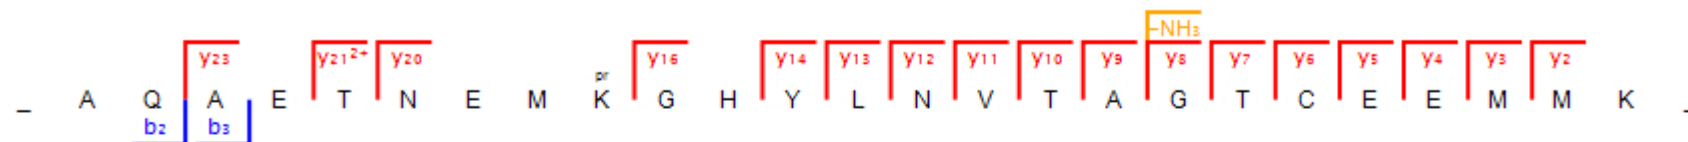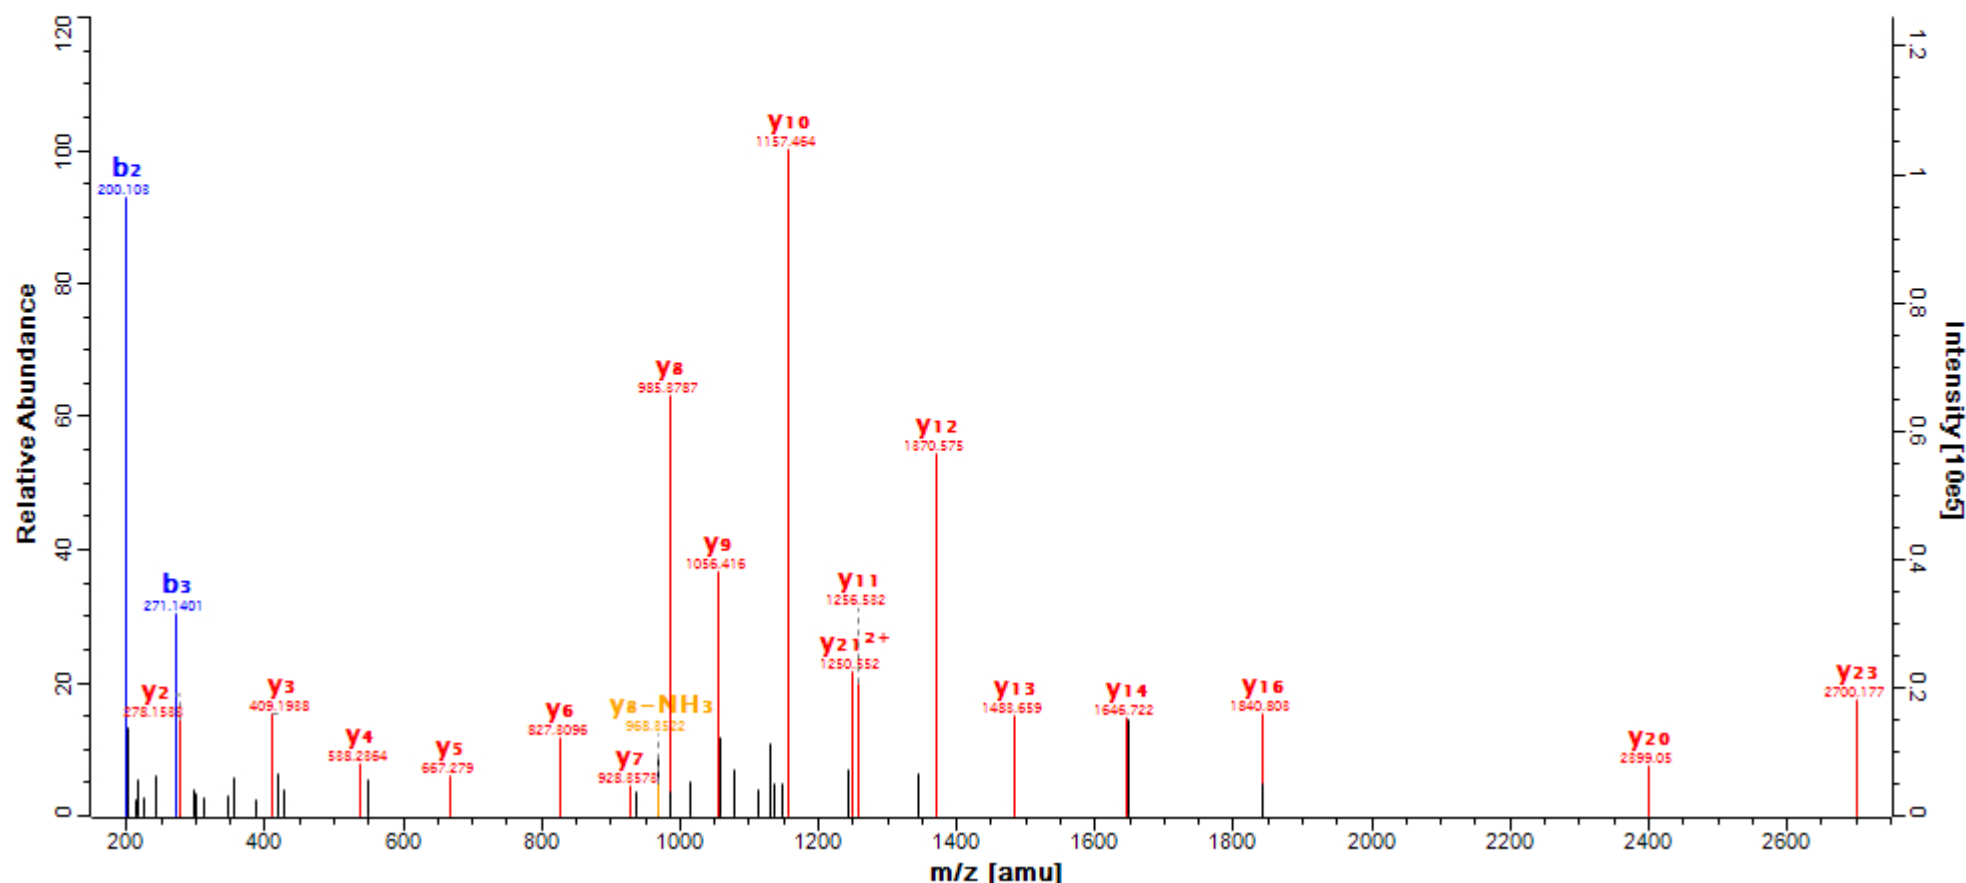

Scan number 6944  
Method FTMS; HCD

Raw file Kprop3  
Peptide 73.85

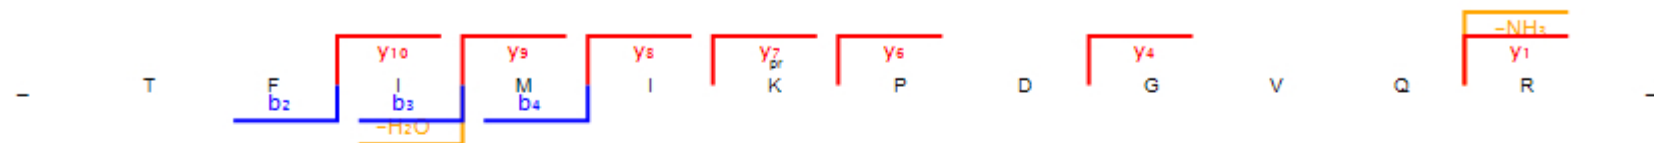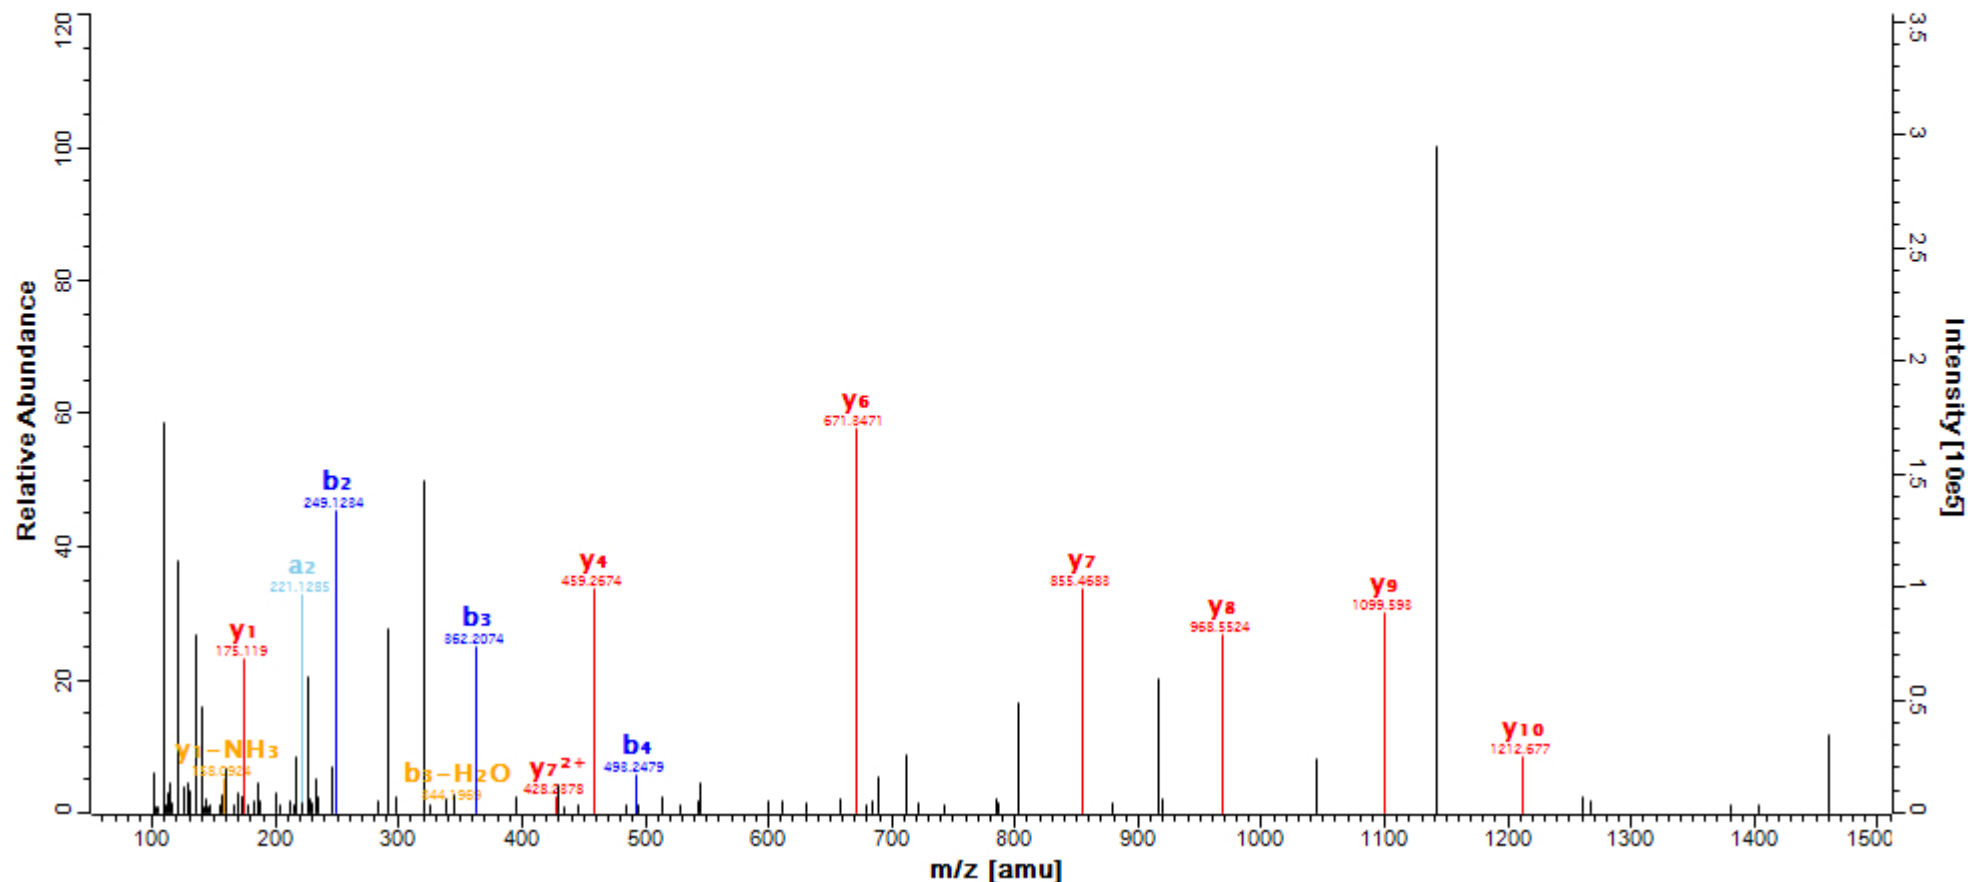

|             |           |          |        |
|-------------|-----------|----------|--------|
| Scan number | 7090      | Raw file | Kprop3 |
| Method      | FTMS; HCD | Peptide  | 107.53 |

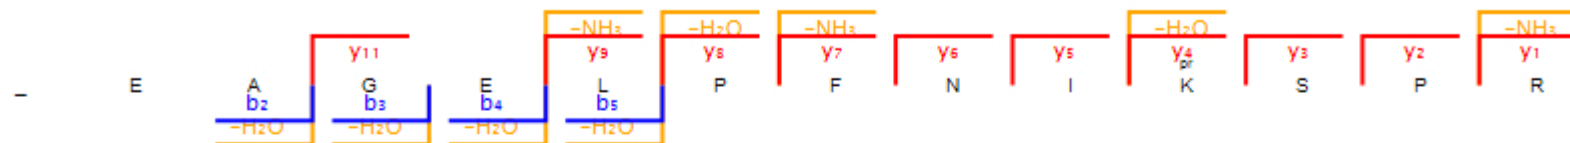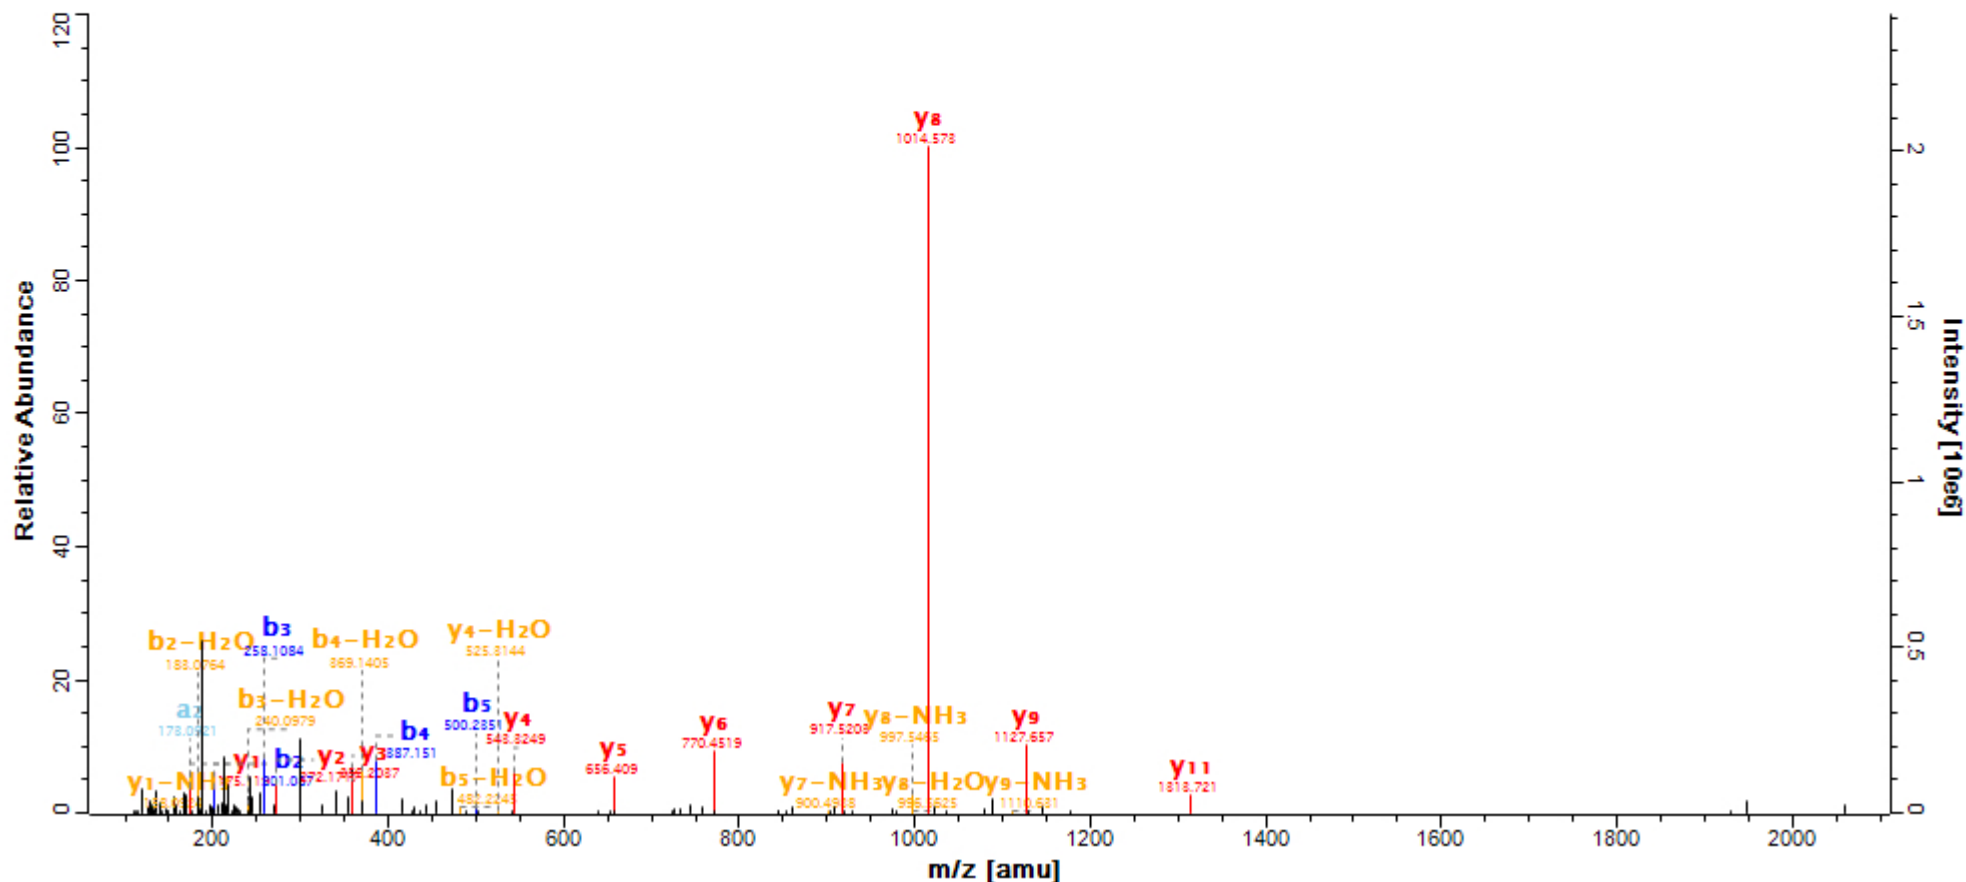

Scan number 7285 Raw file Kprop3  
Method FTMS; HCD Peptide 137.8

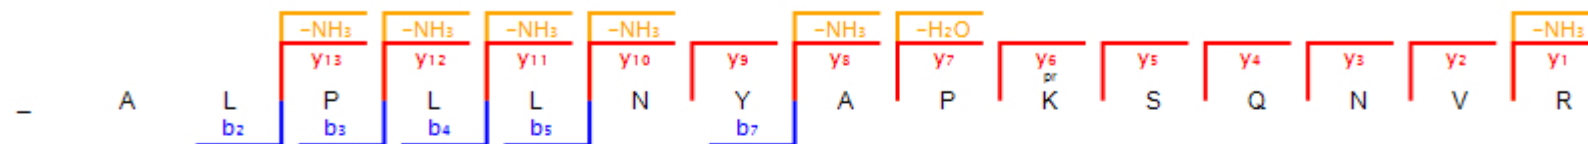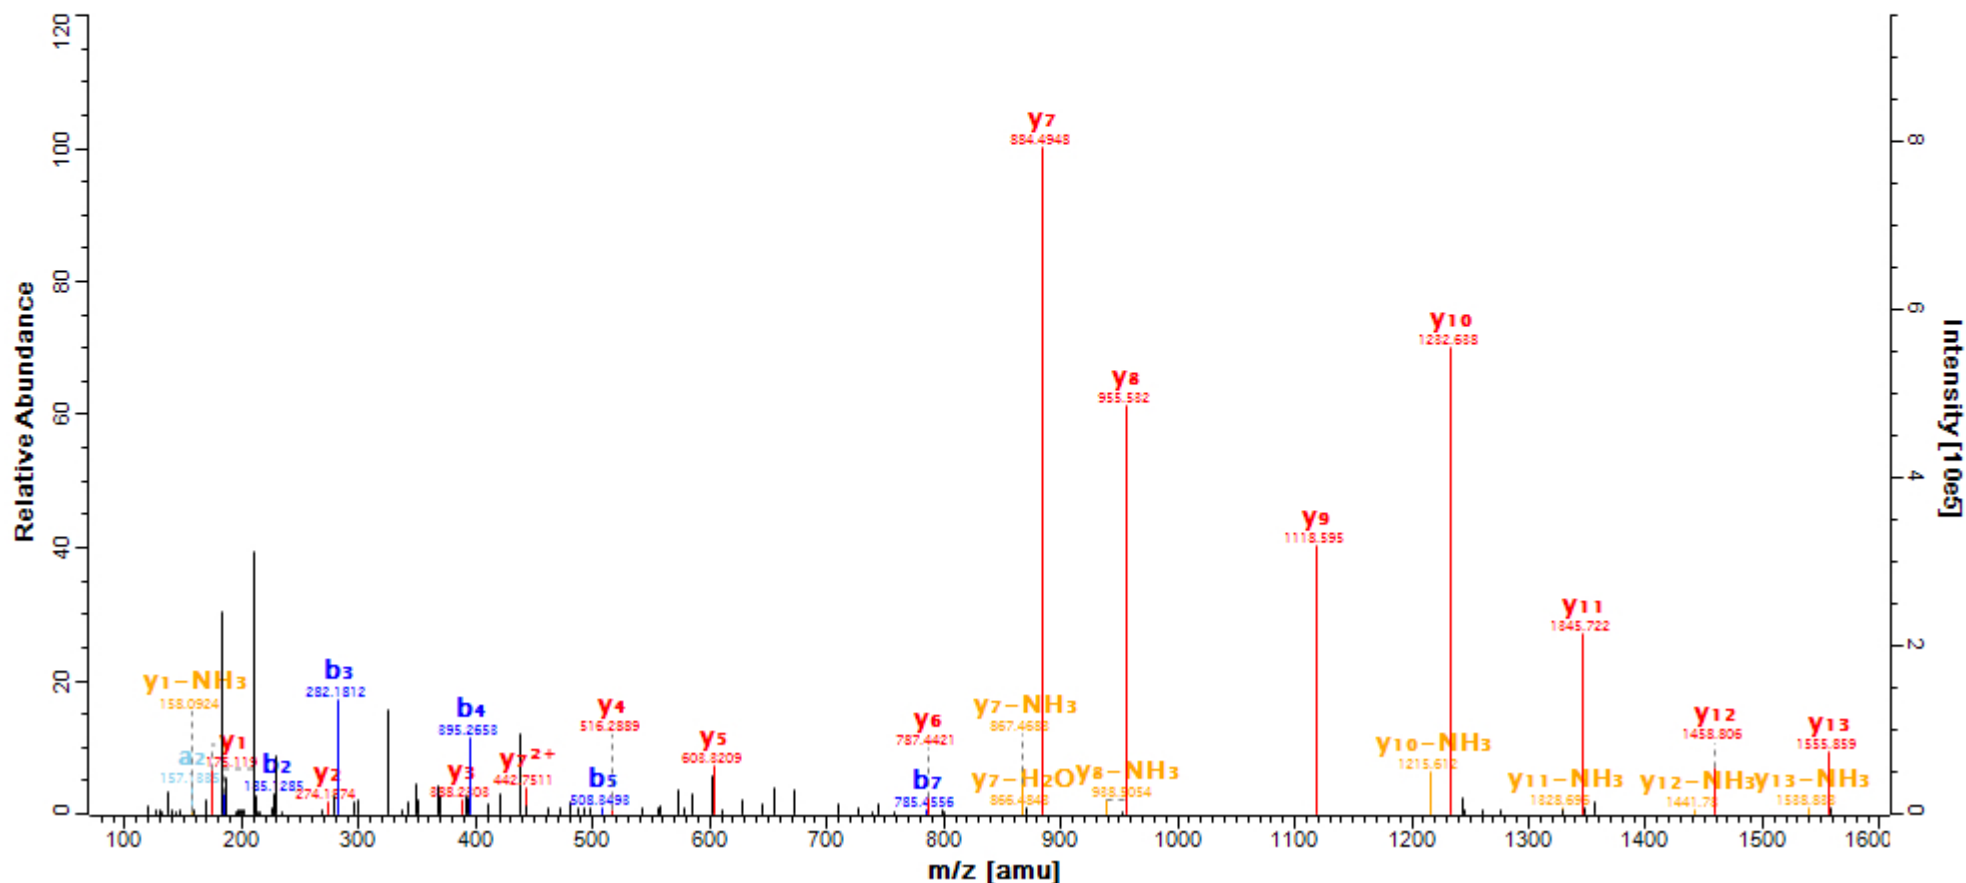

Scan number 7427  
Method FTMS; HCD

Raw file Kprop3  
Peptide 72.9

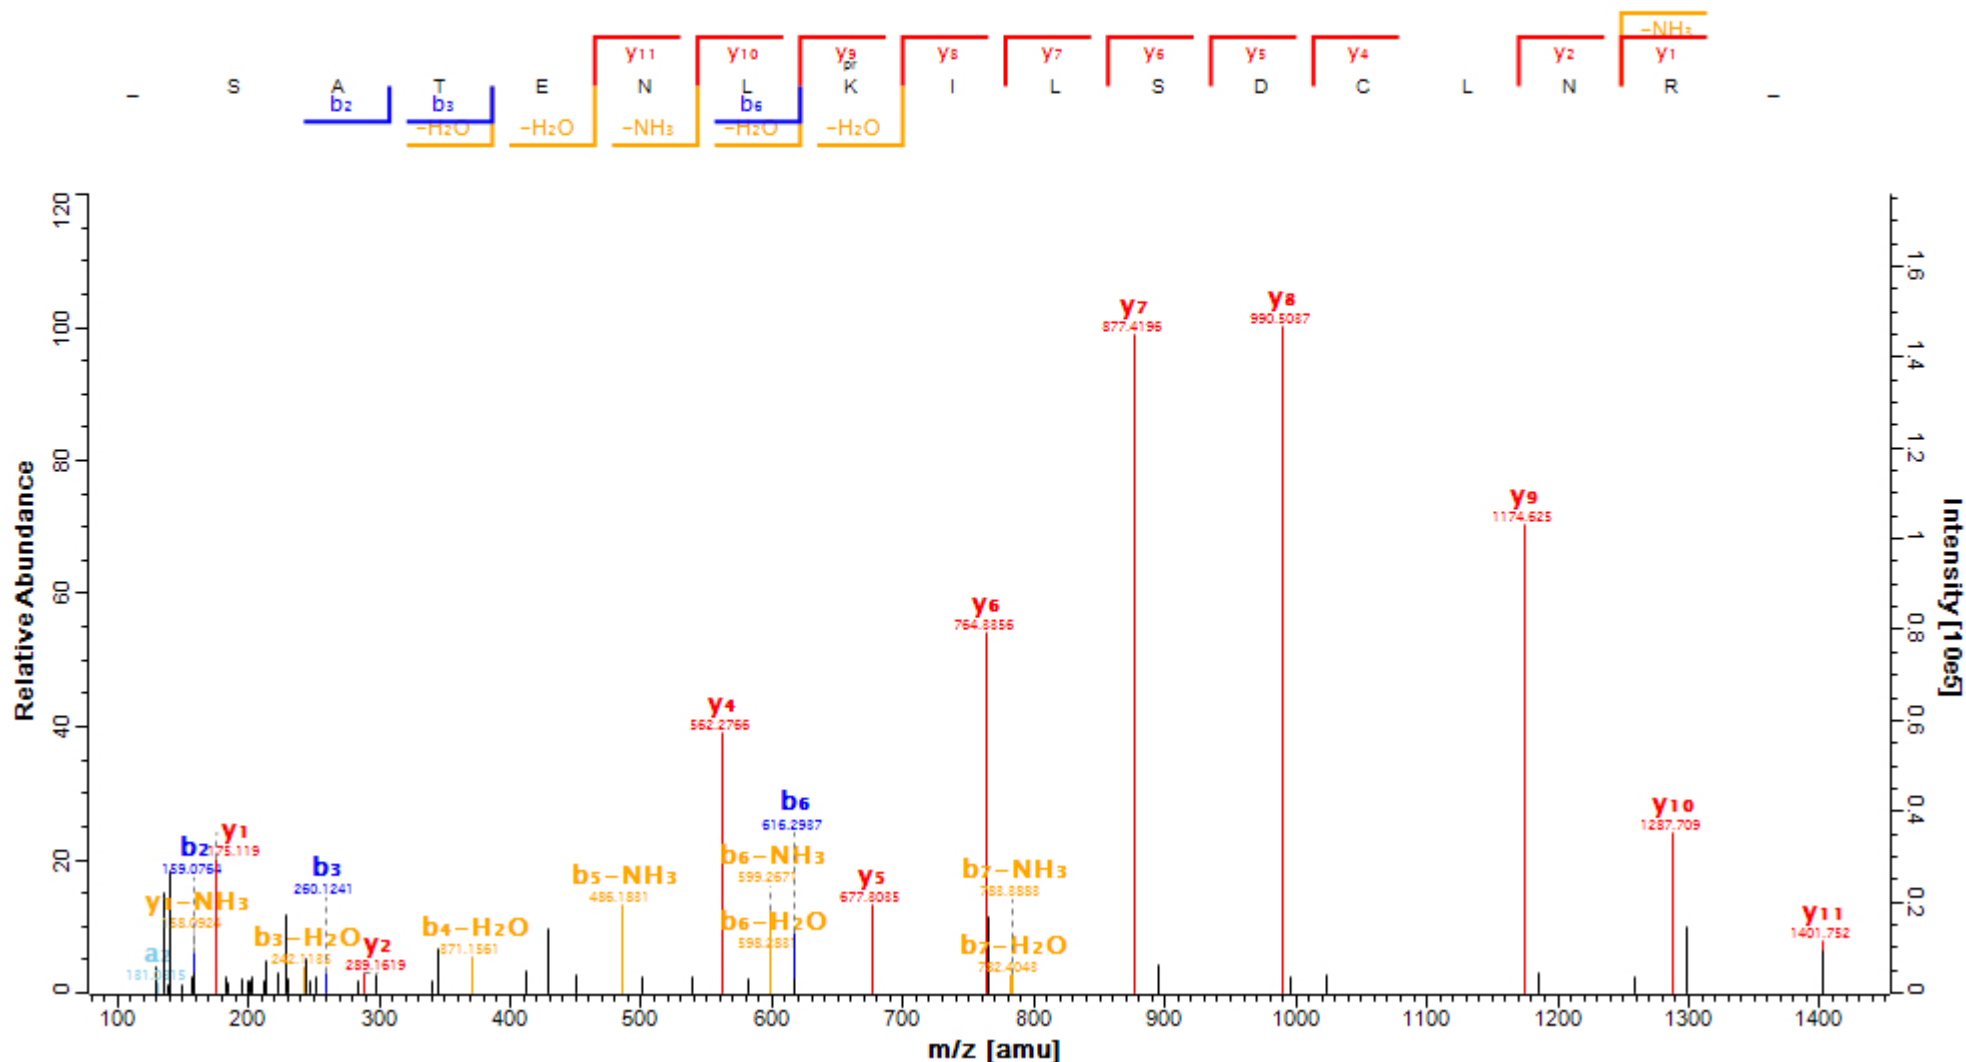

Scan number 7642  
Method FTMS; HCD

Raw file Kprop3  
Peptide 90.97

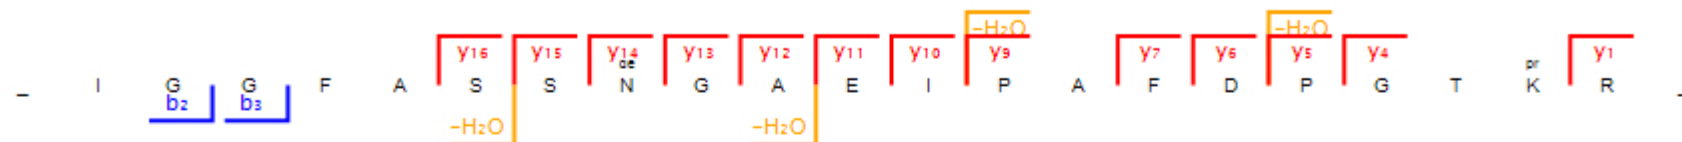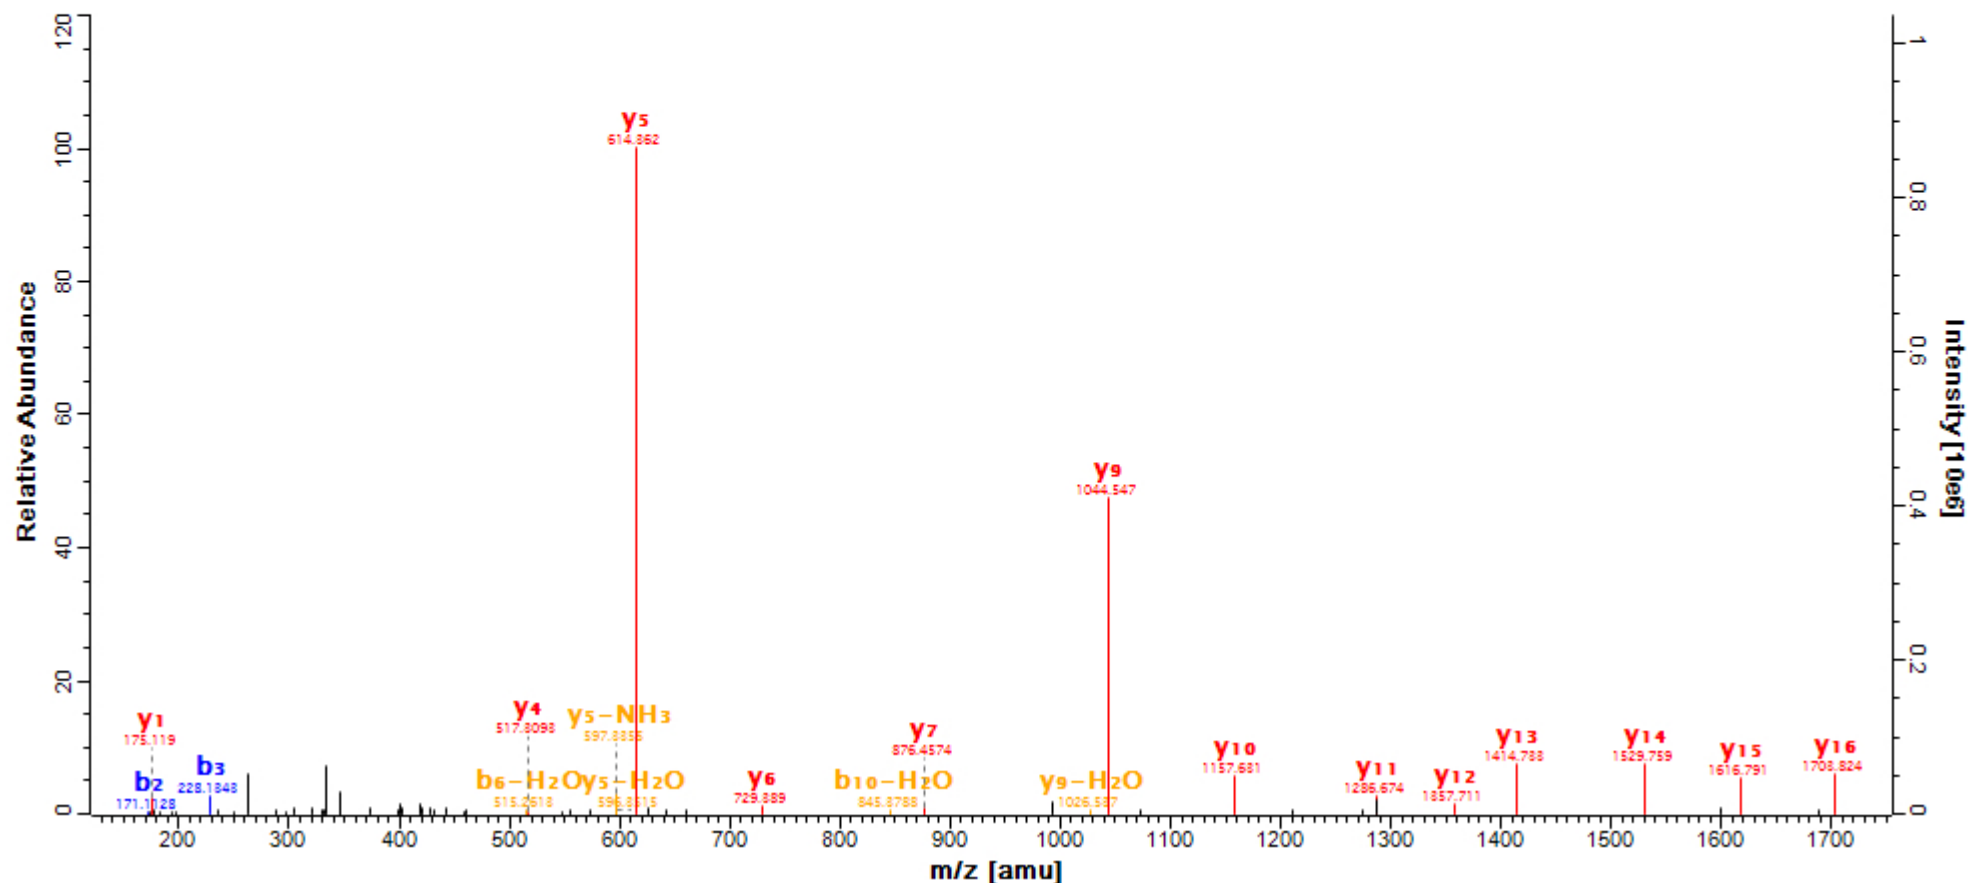

Scan number 8238 Raw file Kprop3  
 Method FTMS; HCD Peptide 87.15

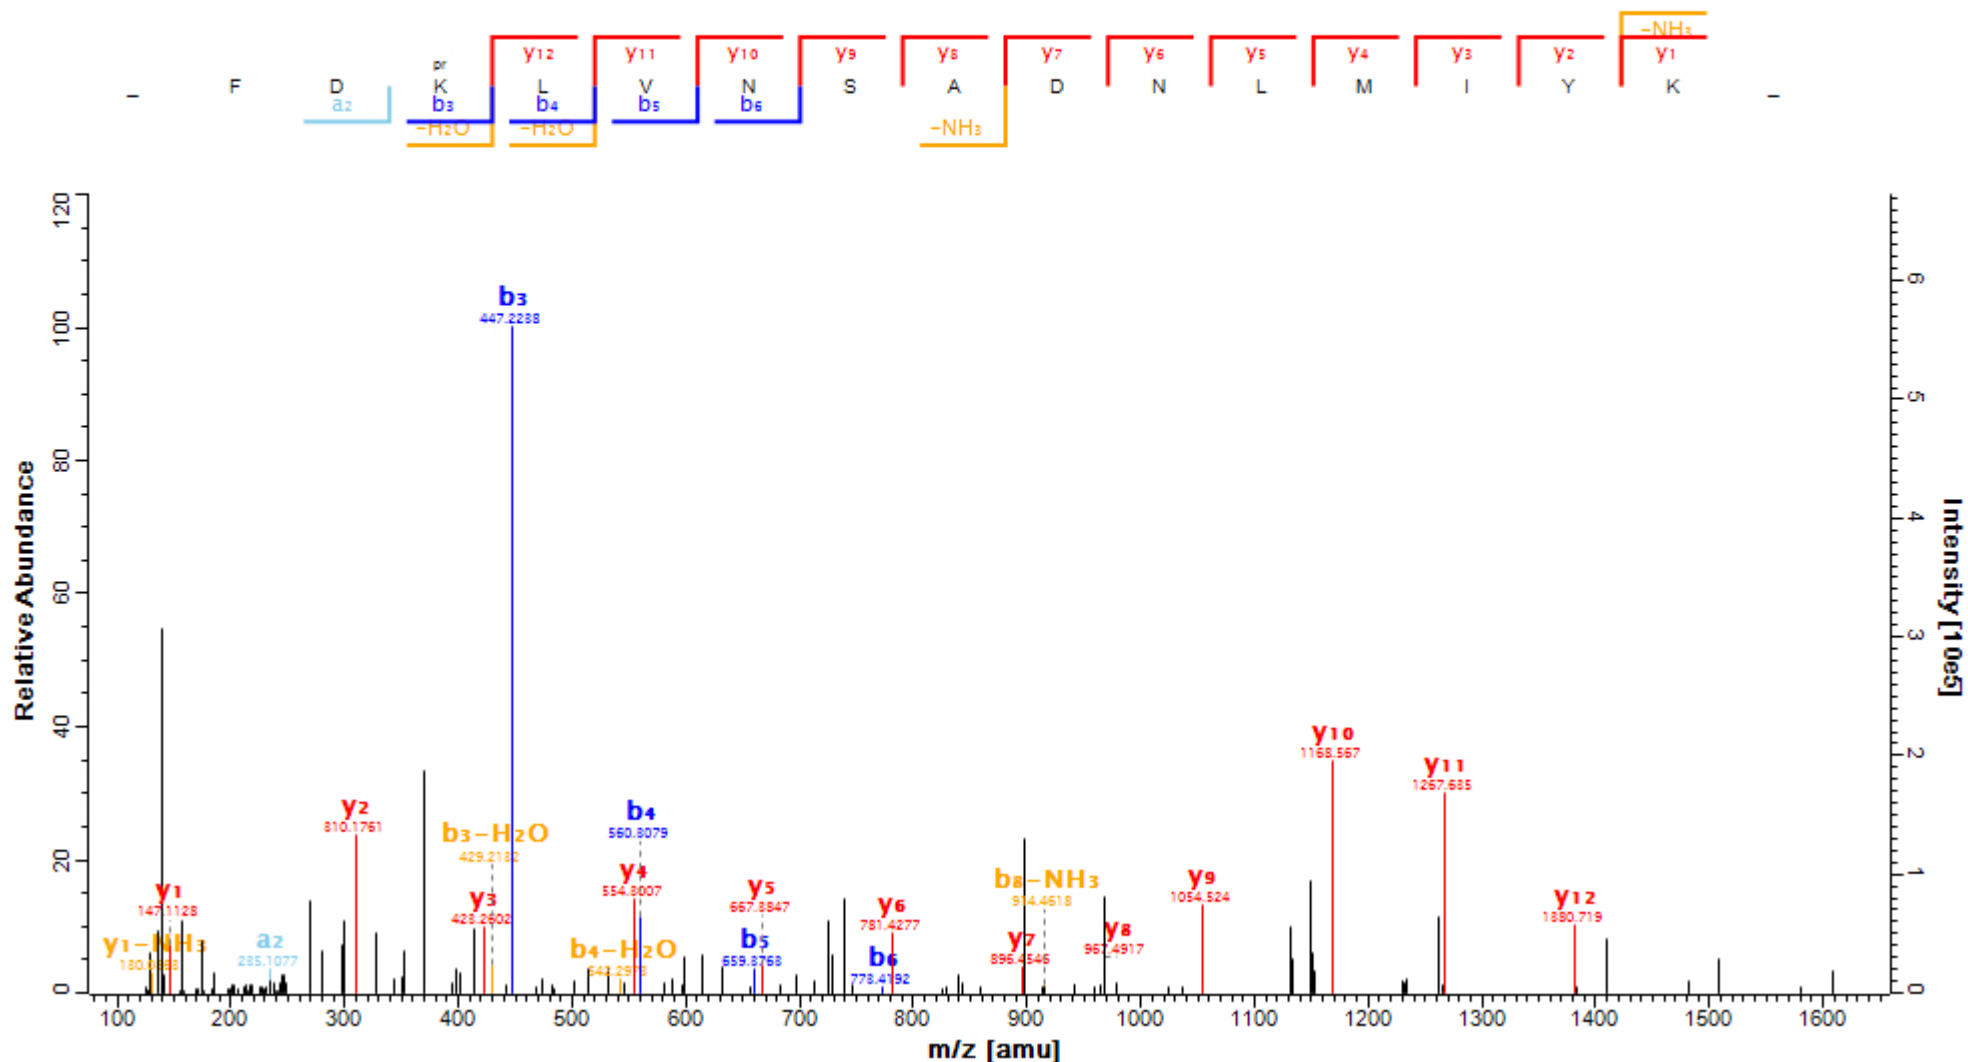

Scan number 8263 Raw file Kprop3  
Method FTMS; HCD Peptide 177.07

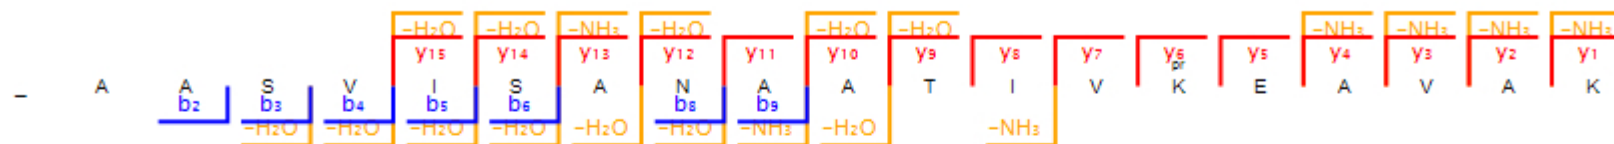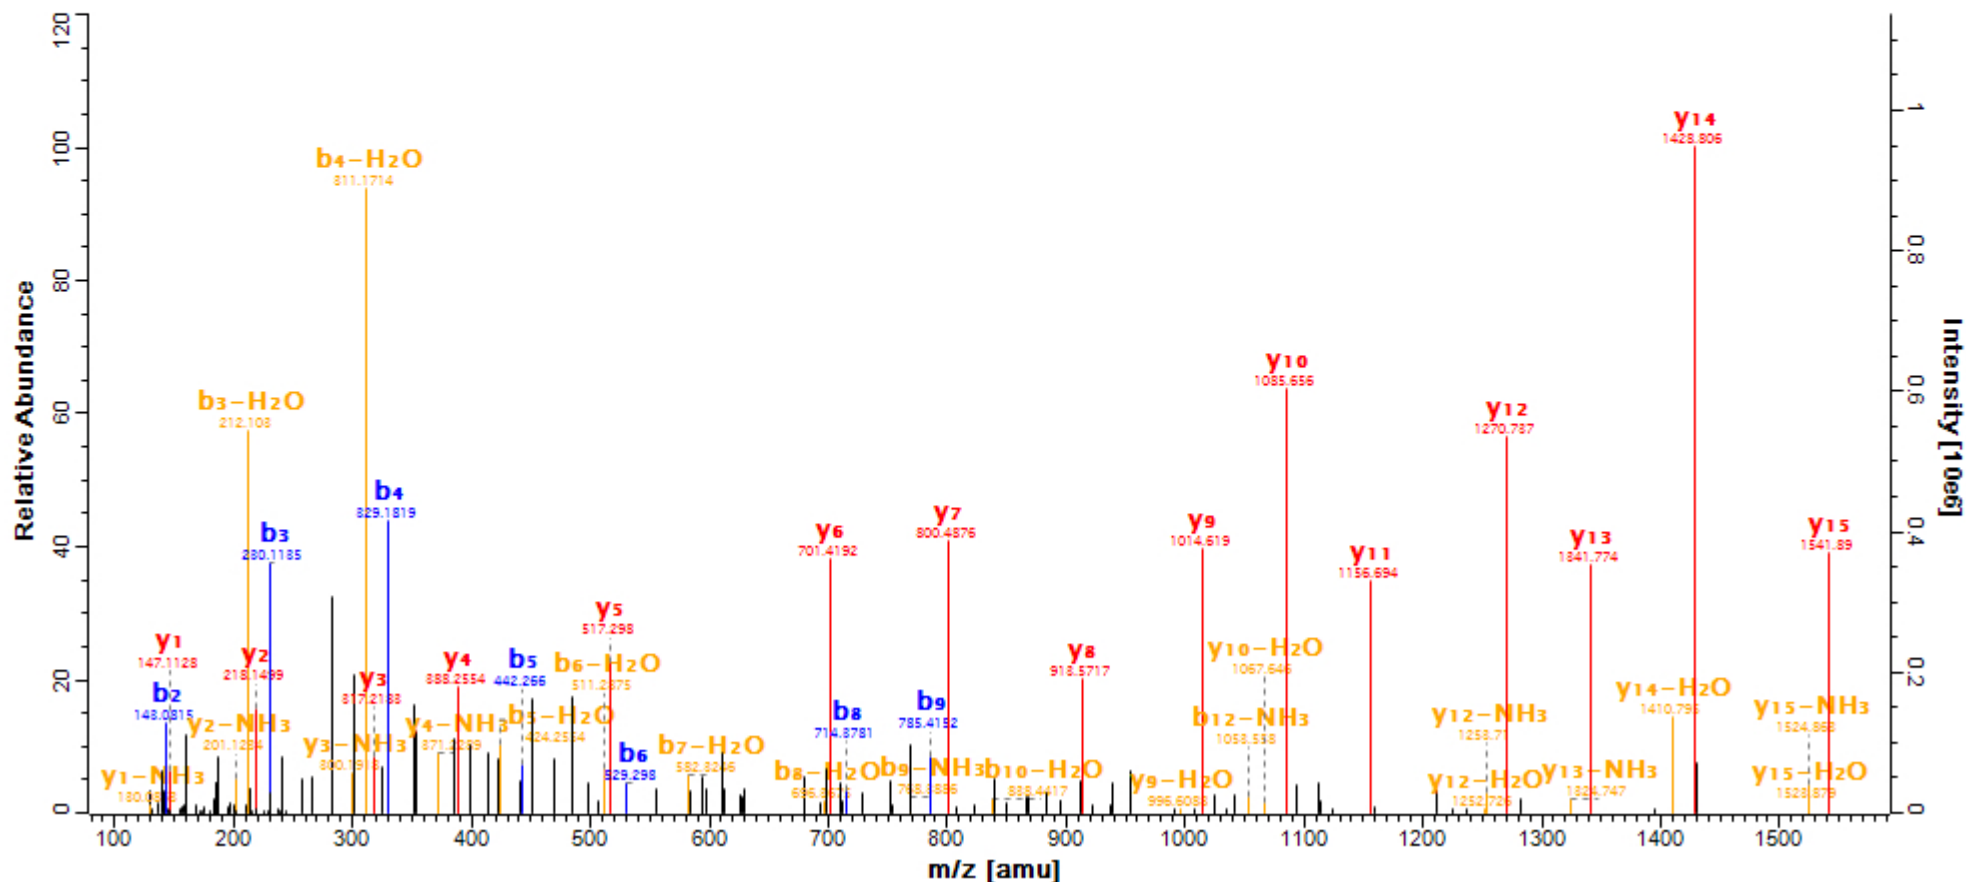



Scan number 8596 Raw file Kprop3  
 Method FTMS; HCD Peptide 88.09

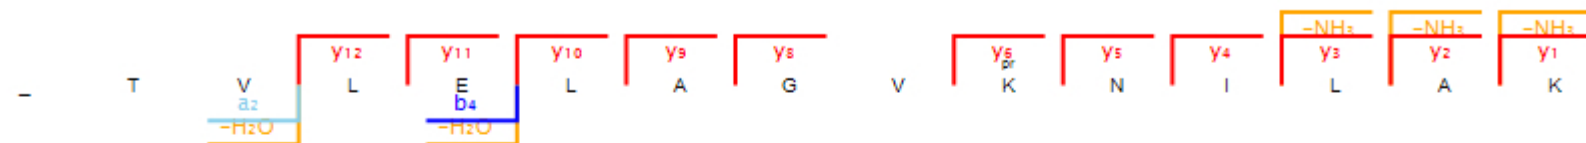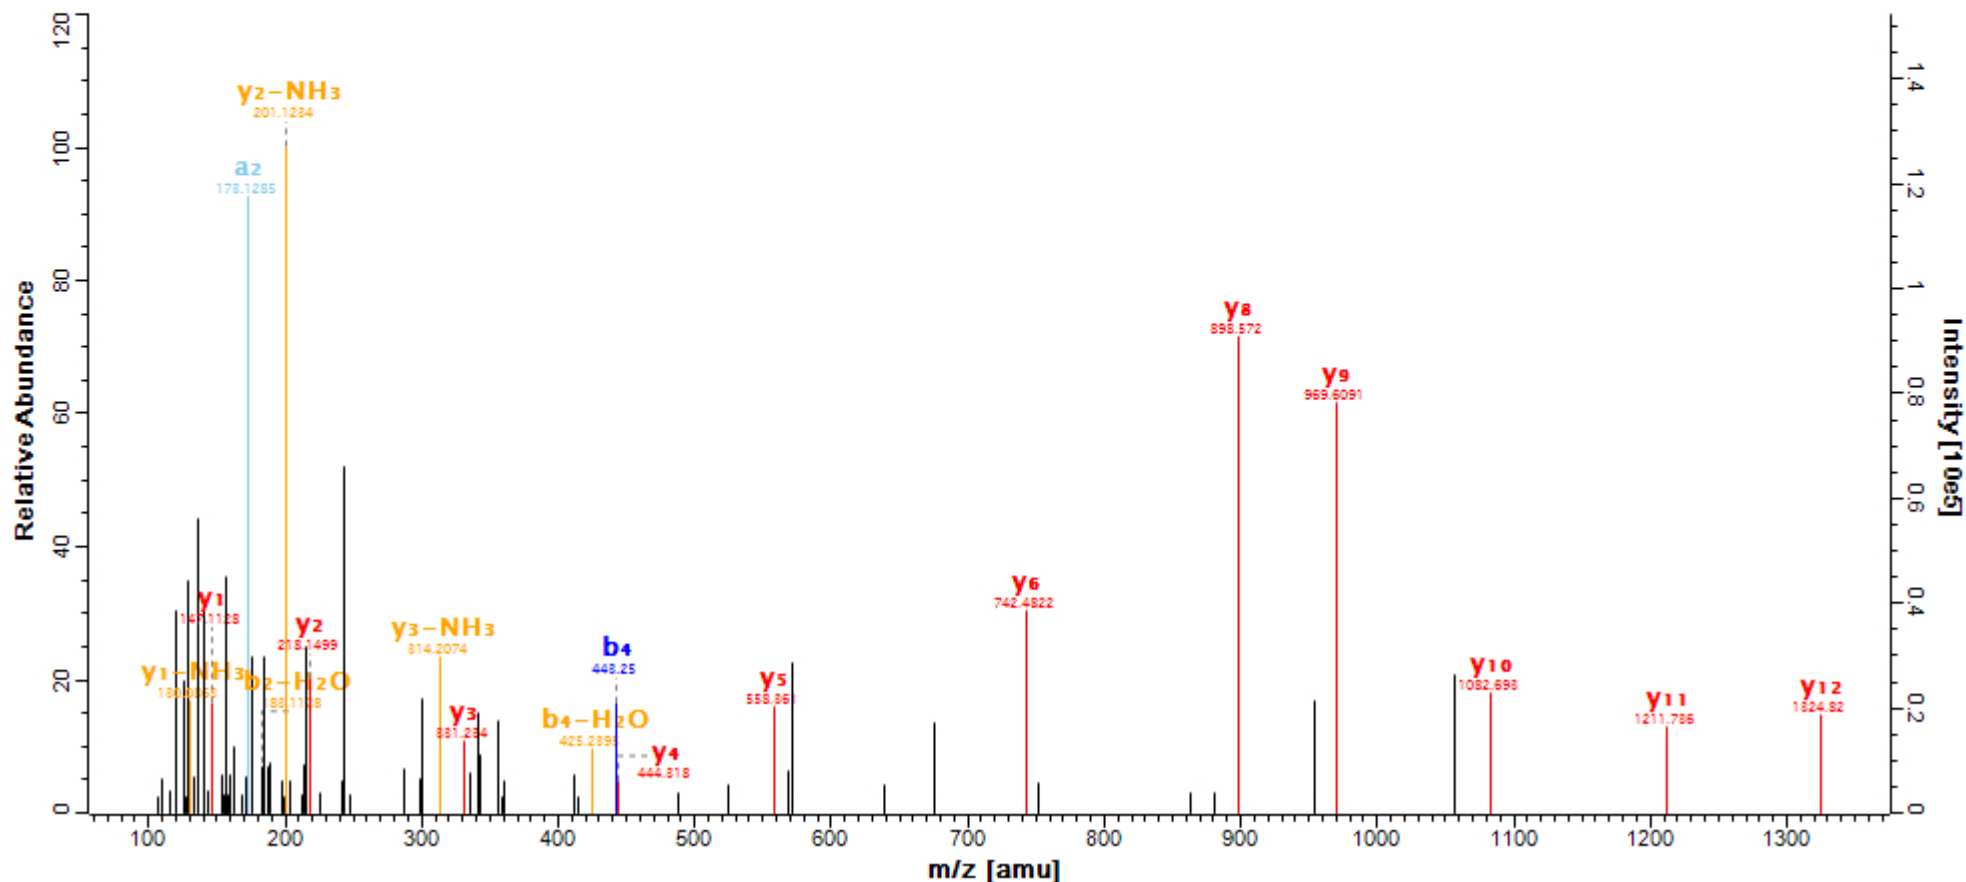

Scan number 8807 Raw file Kprop3  
Method FTMS; HCD Peptide 116.35

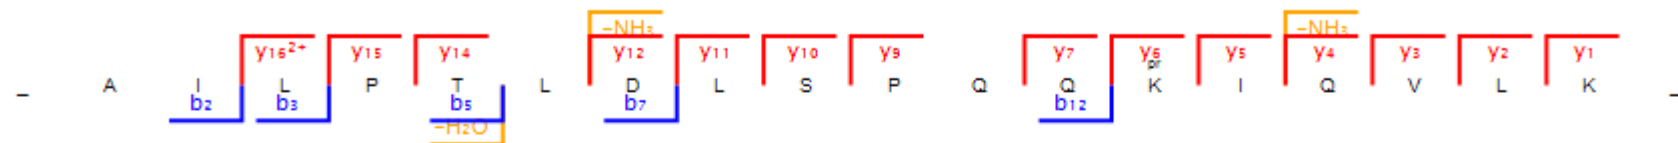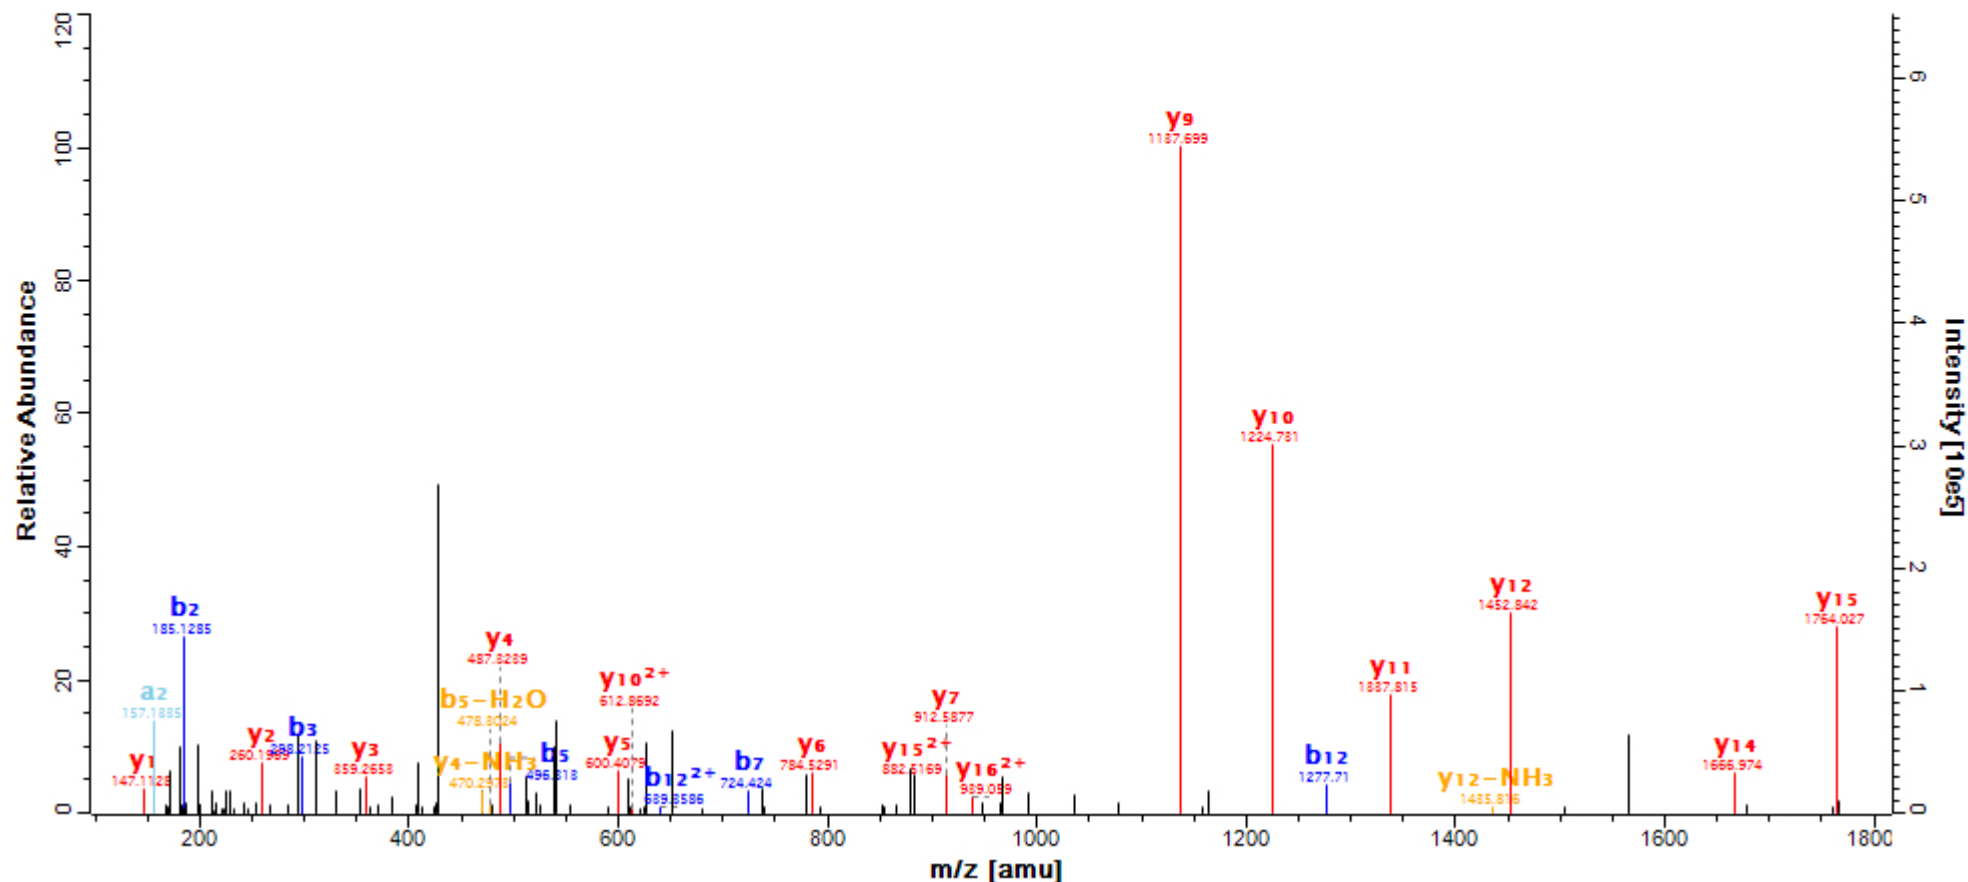

|             |           |          |        |
|-------------|-----------|----------|--------|
| Scan number | 8810      | Raw file | Kprop3 |
| Method      | FTMS; HCD | Pepti... | 73.07  |

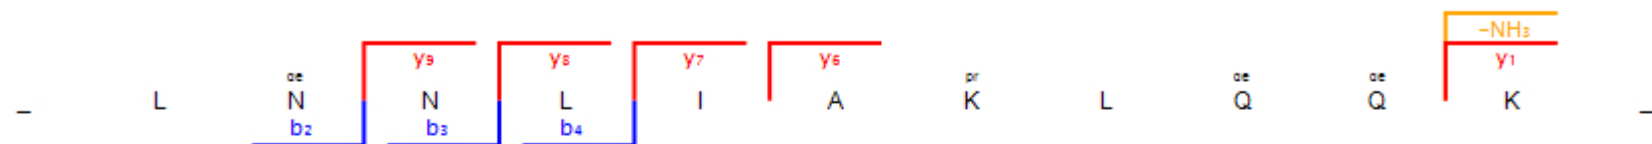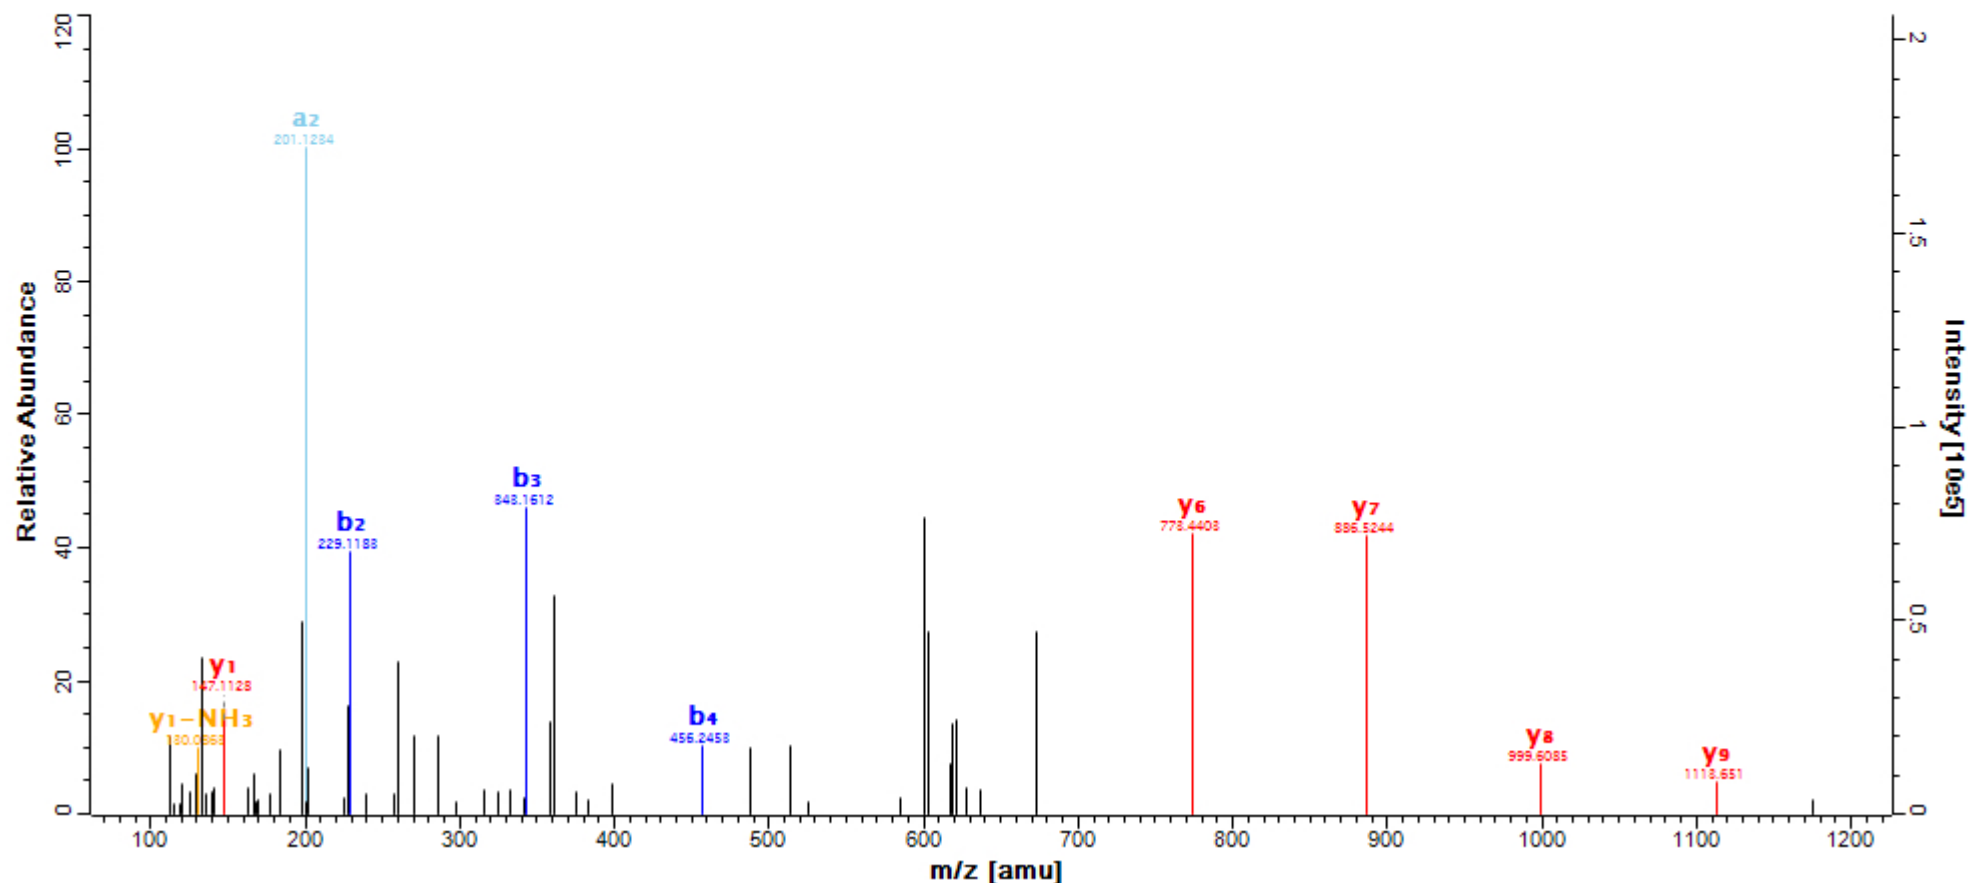

Scan number 1184  
Method FTMS; HCD

Raw file Kprop4  
Peptide 104.52

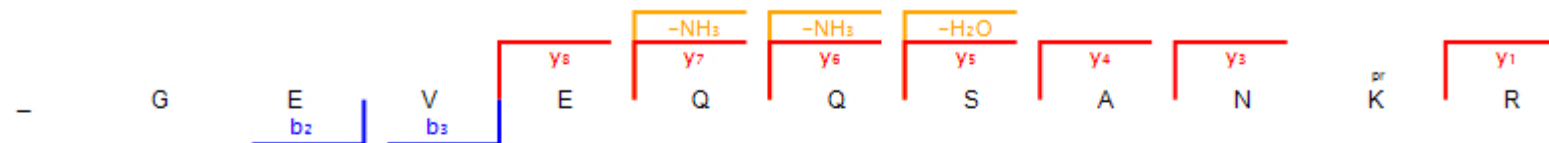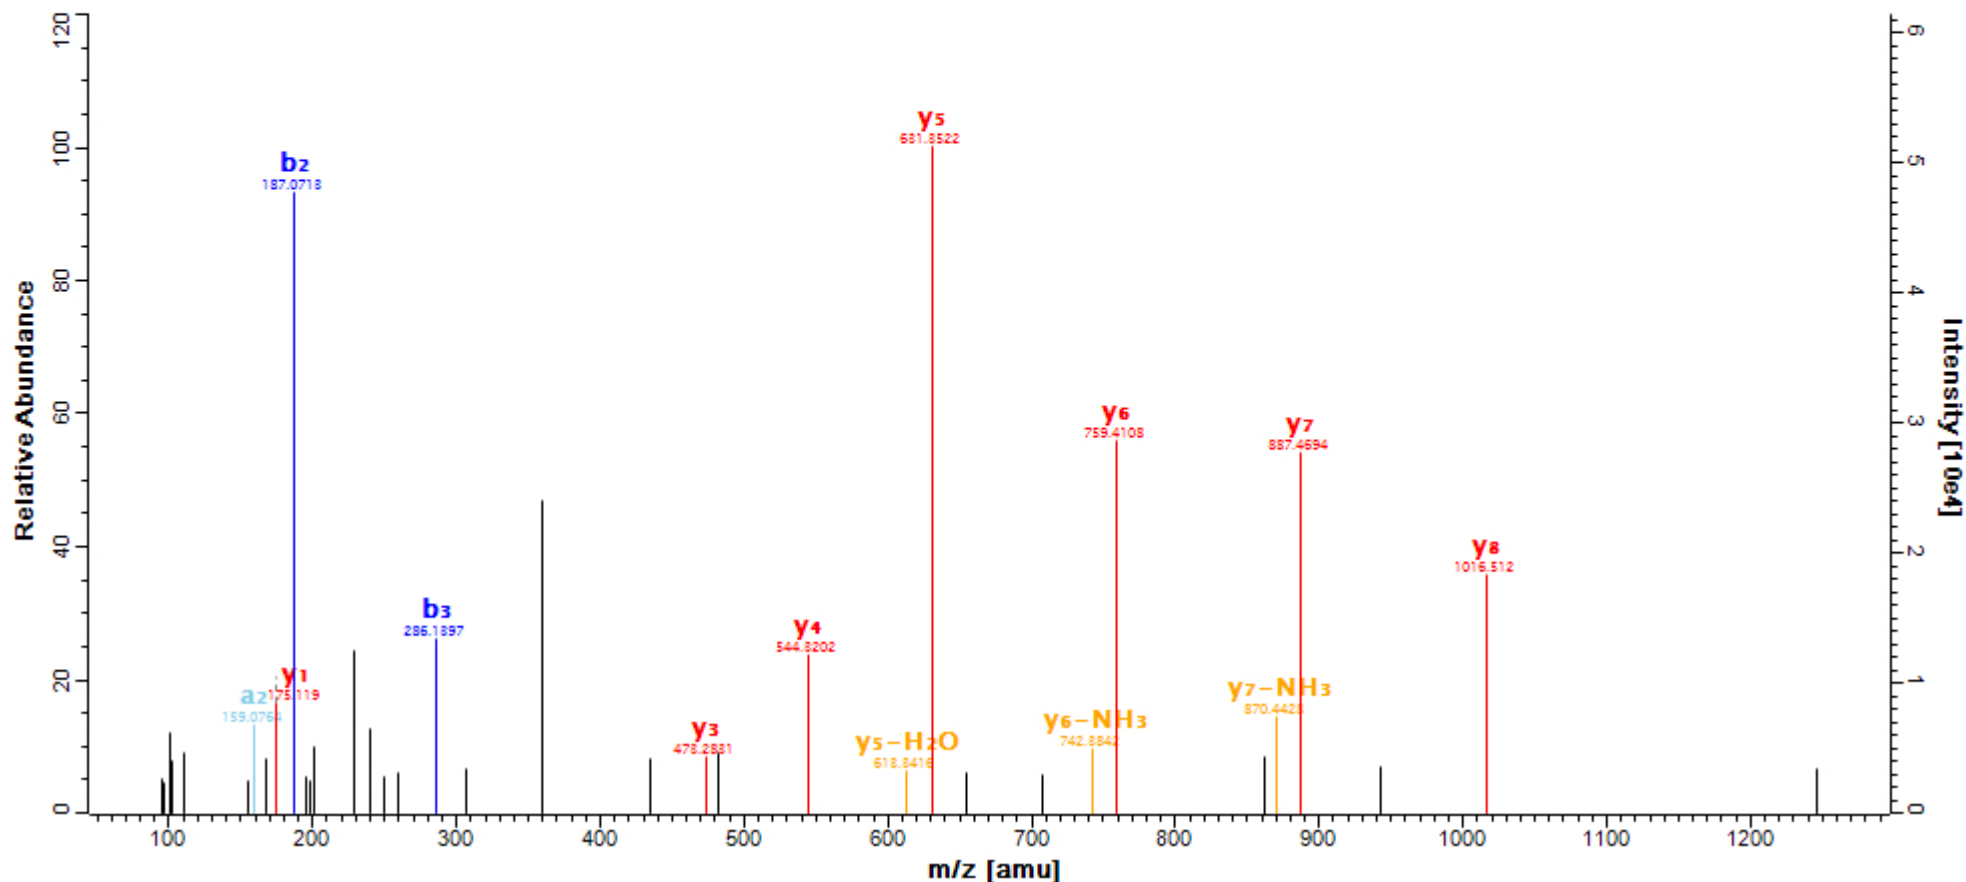

Scan number 5810 Raw file Kprop4  
Method FTMS; HCD Peptide 76.85

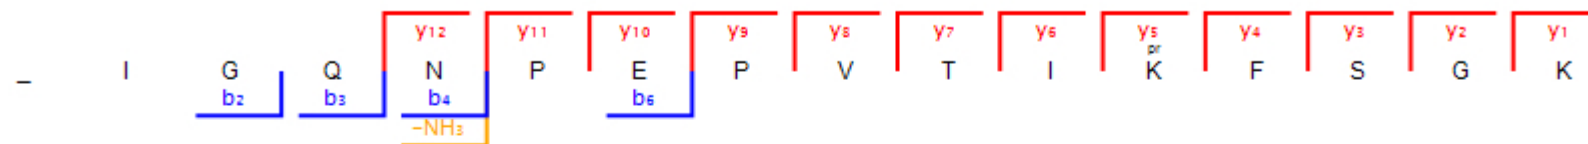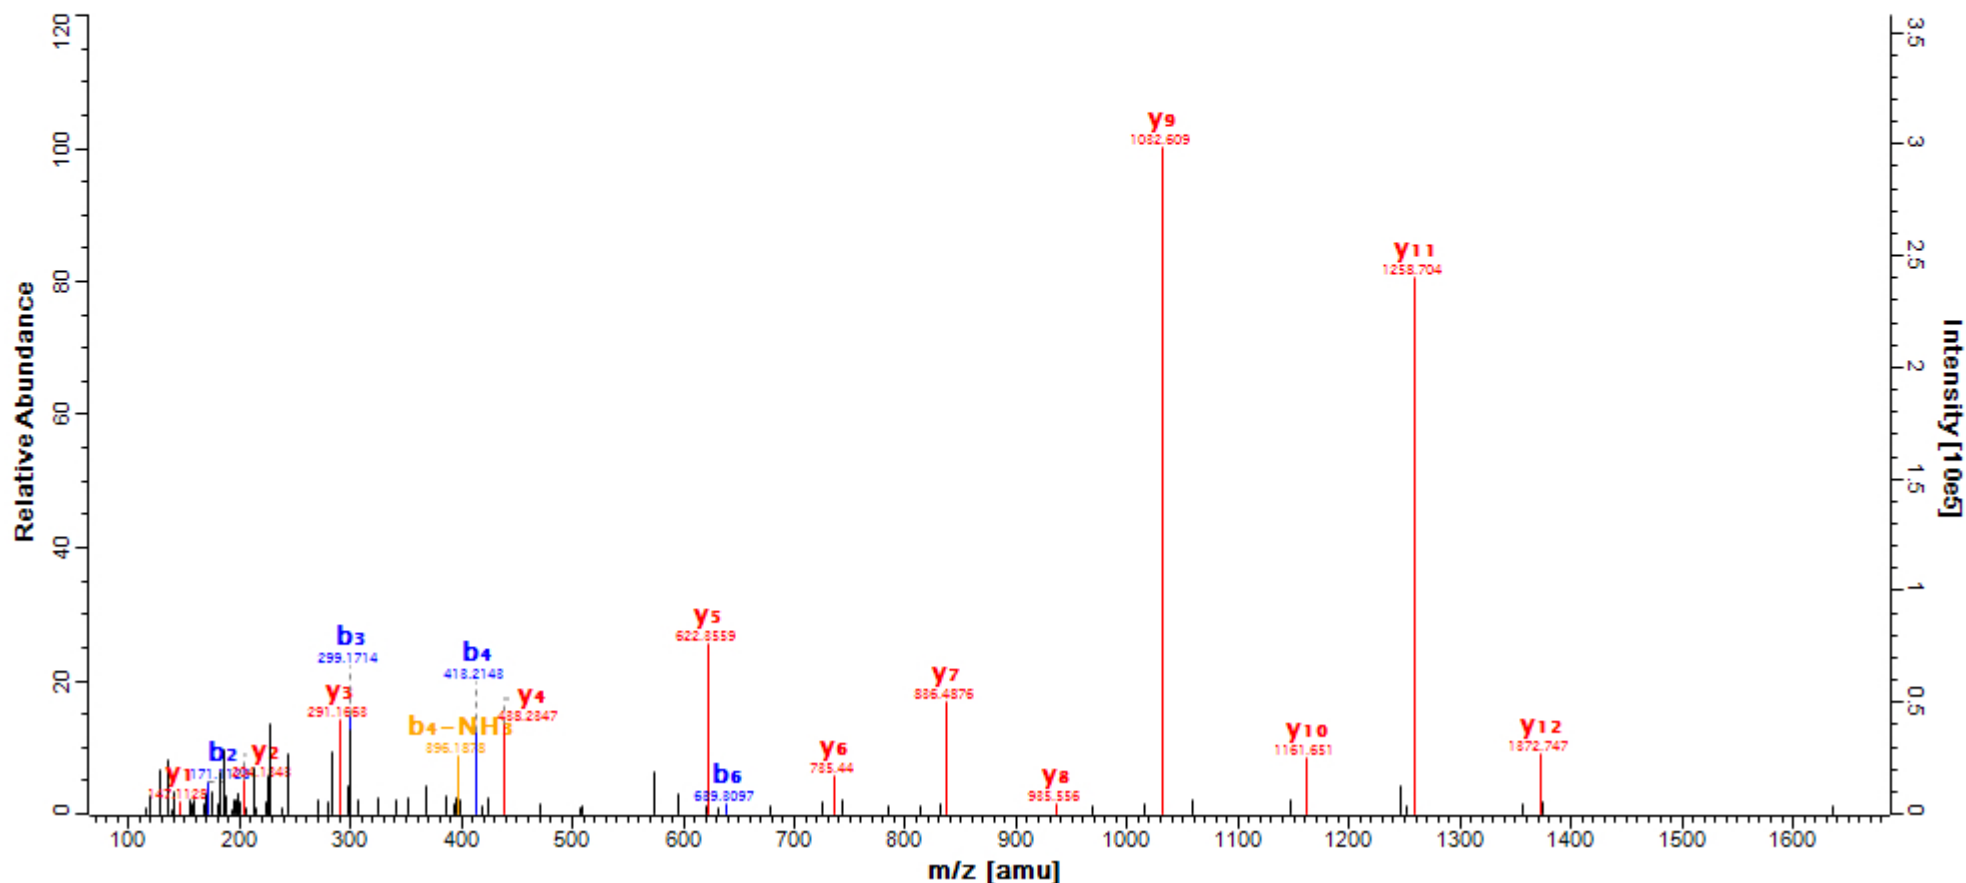

Scan number 6141  
Method FTMS; HCD

Raw file Kprop4  
Peptide 79.31

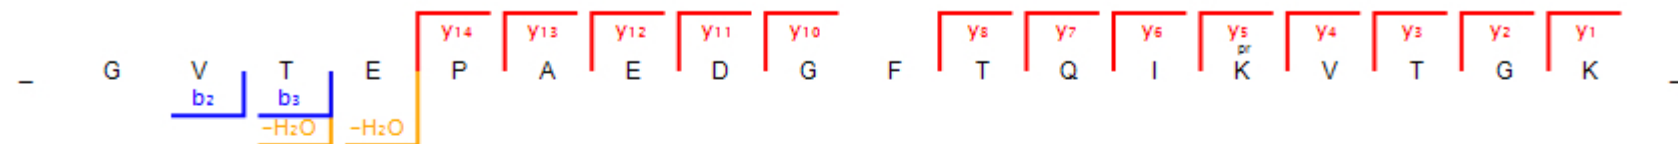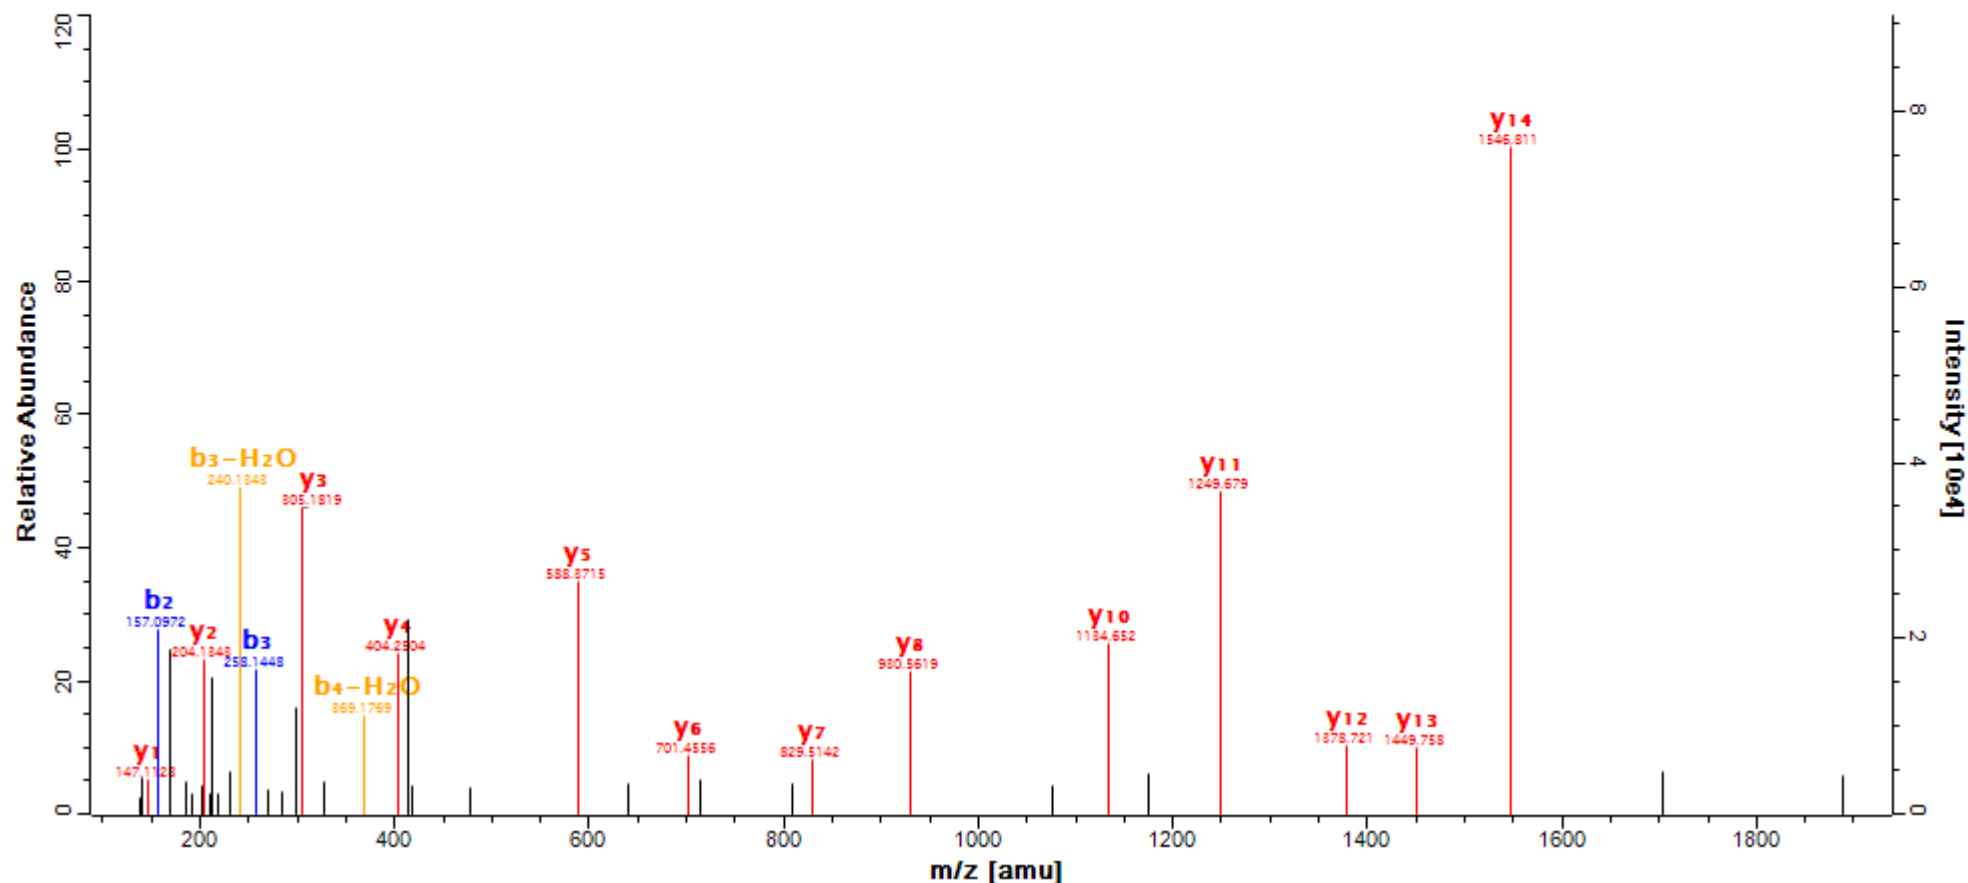

Scan number 6486  
Method FTMS; HCD

Raw file Kprop4  
Peptide 115.82

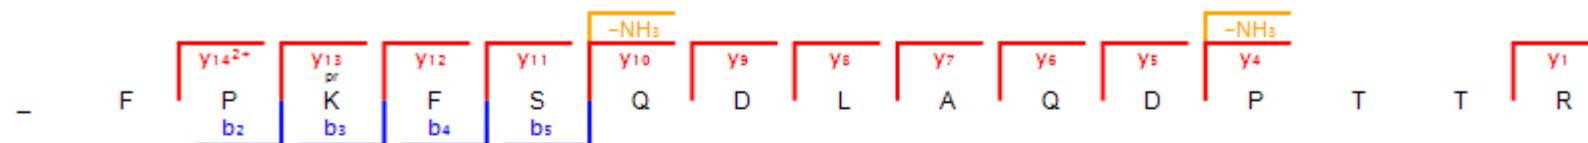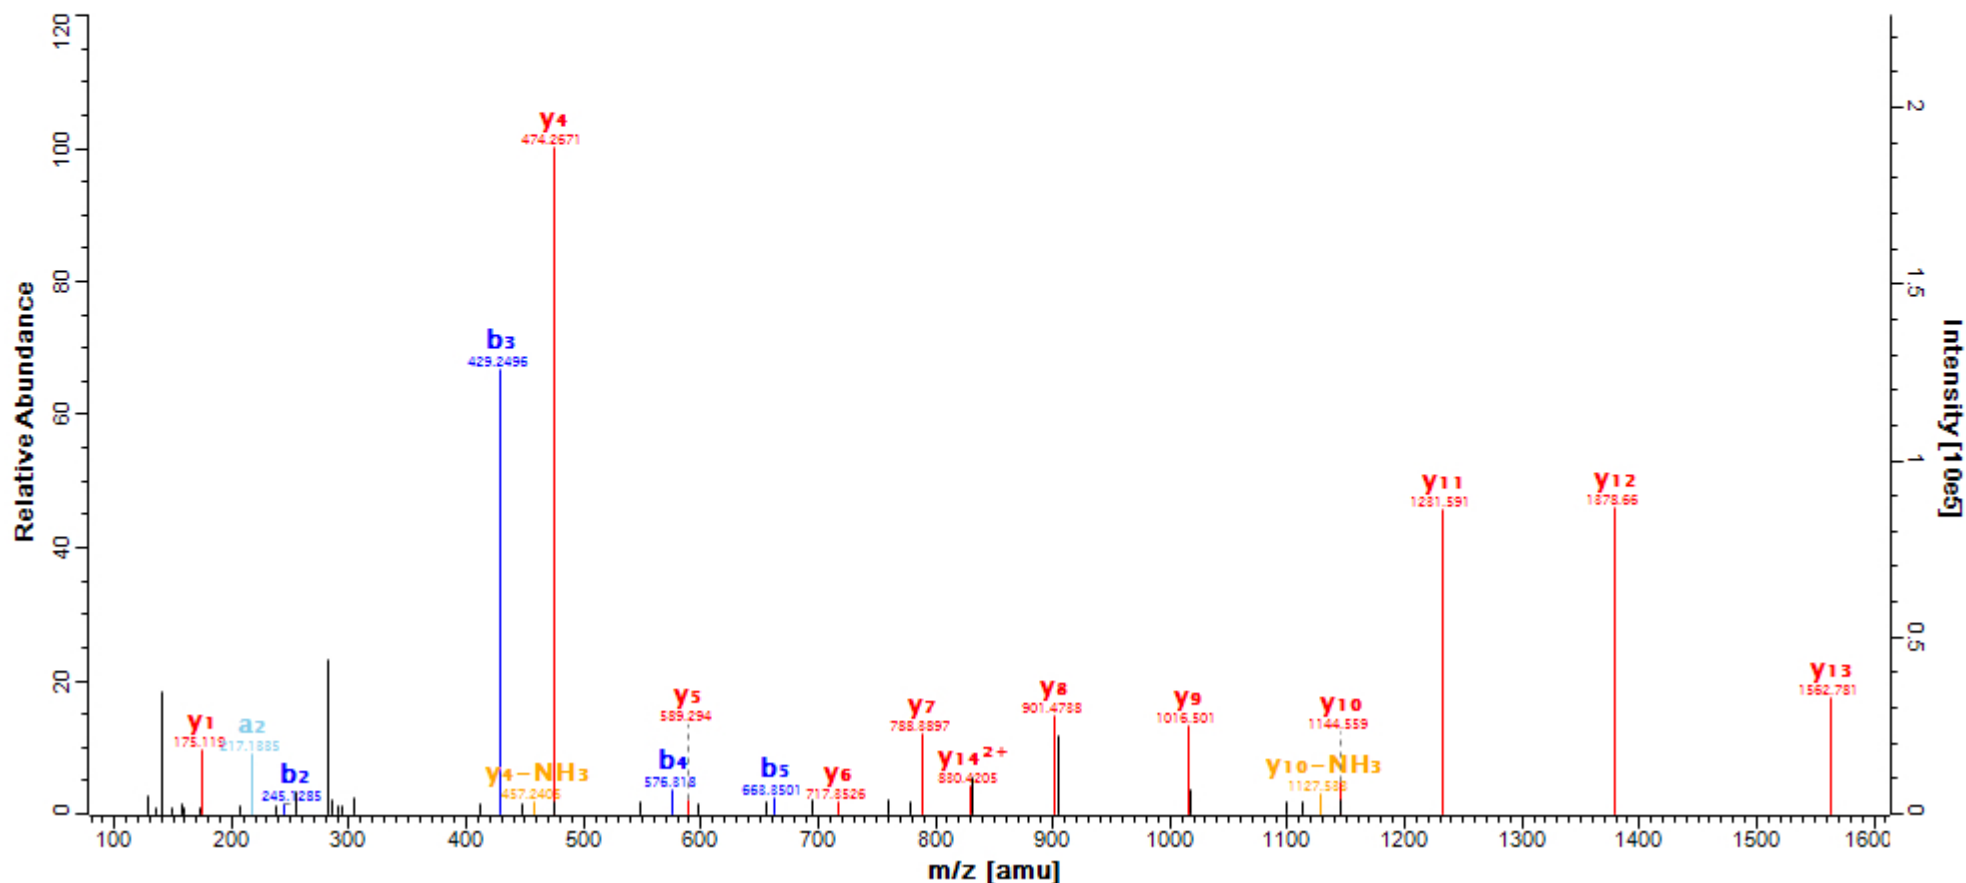

Scan number 7207 Raw file Kprop4  
Method FTMS; HCD Peptide 96.25

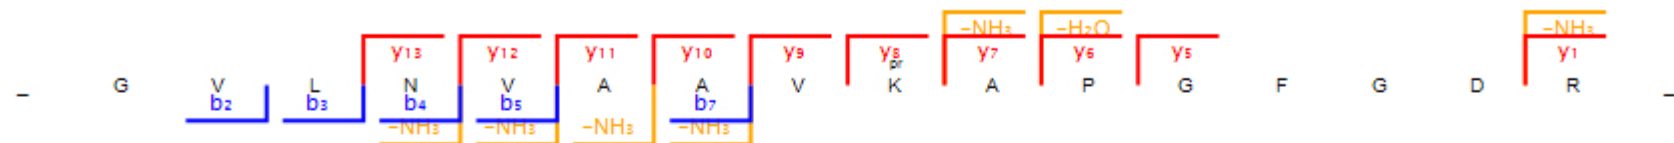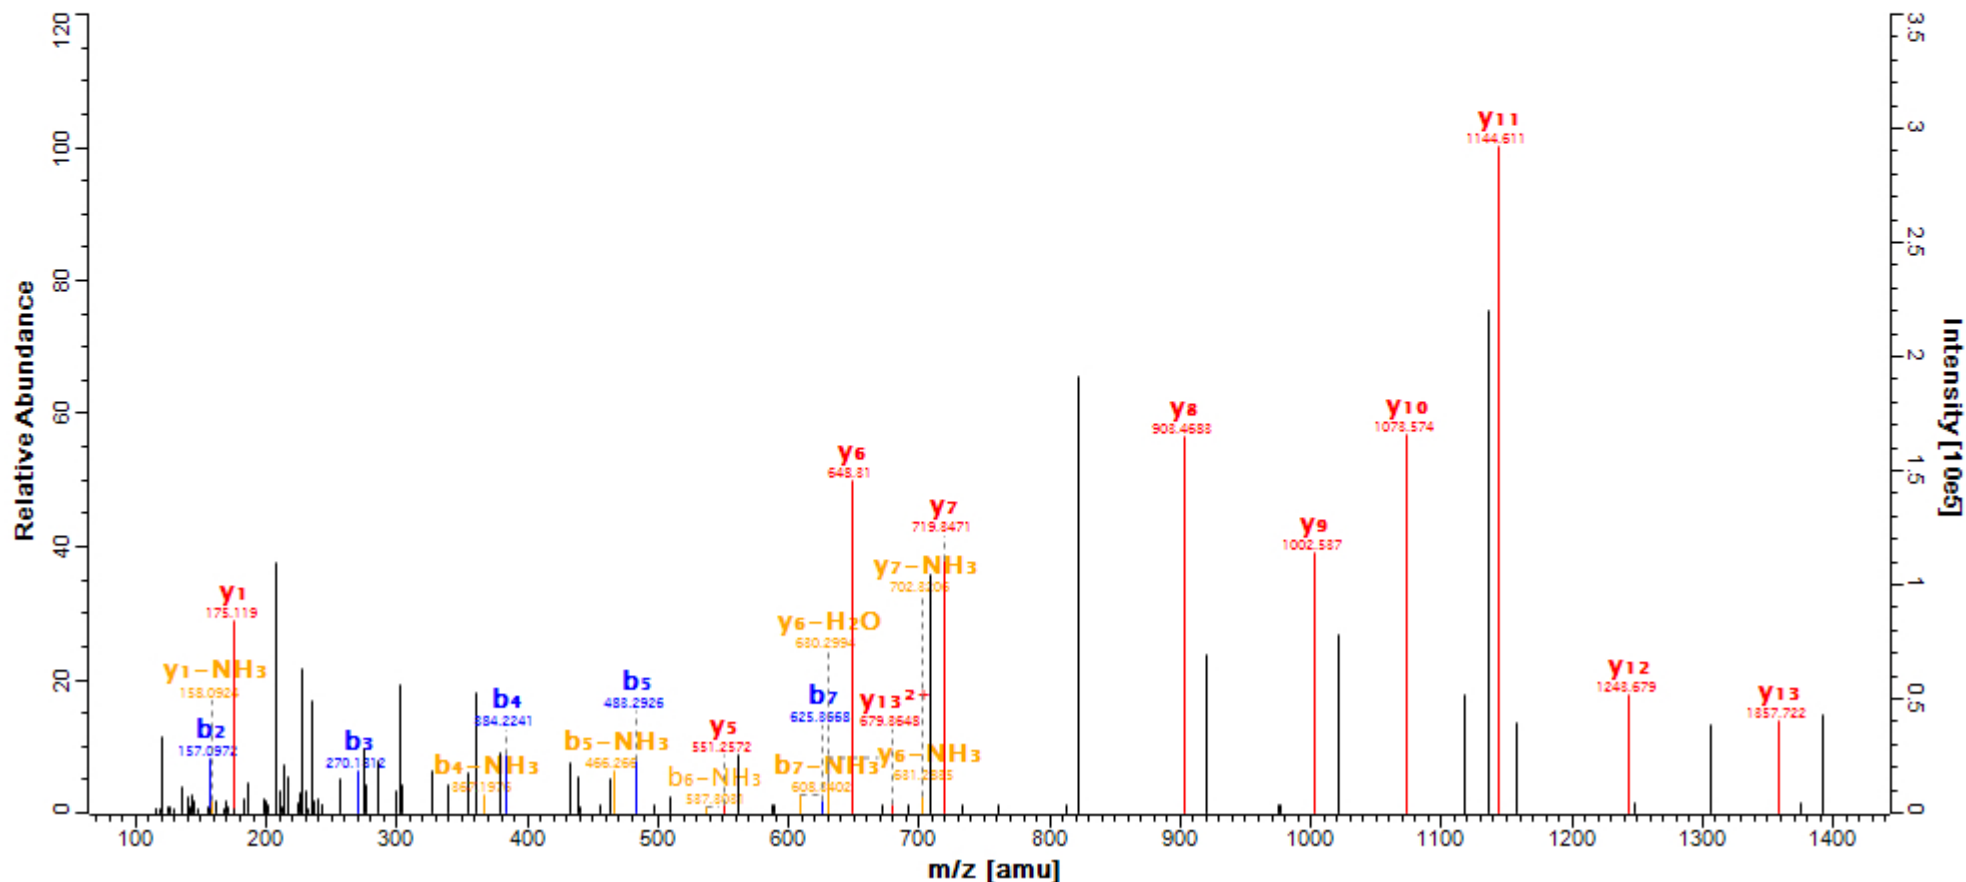



Scan number 2442  
Method FTMS; HCD

Raw file Kprop5  
Peptide 81.87

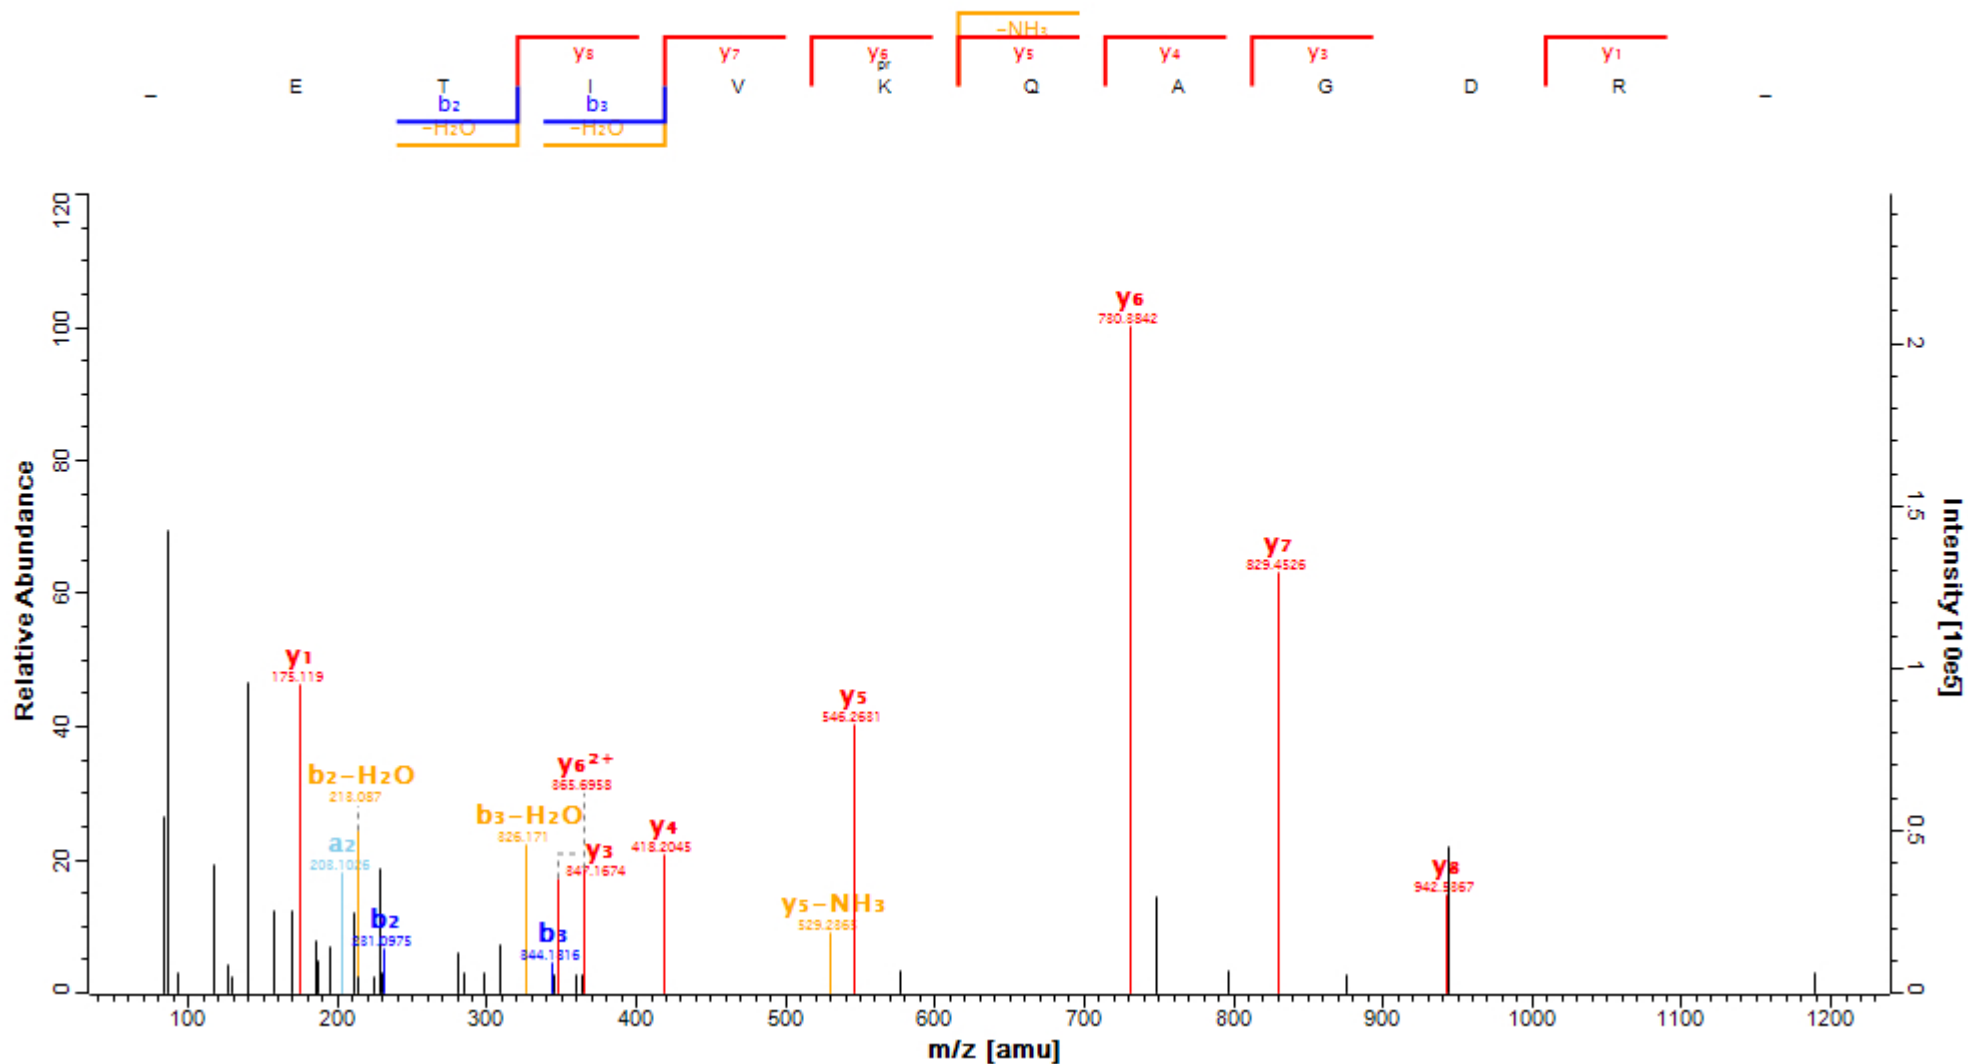

Scan number 2733  
Method FTMS; HCD

Raw file Kprop5  
Peptide 69.98

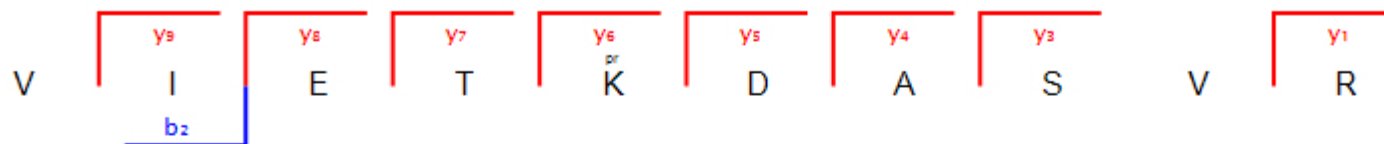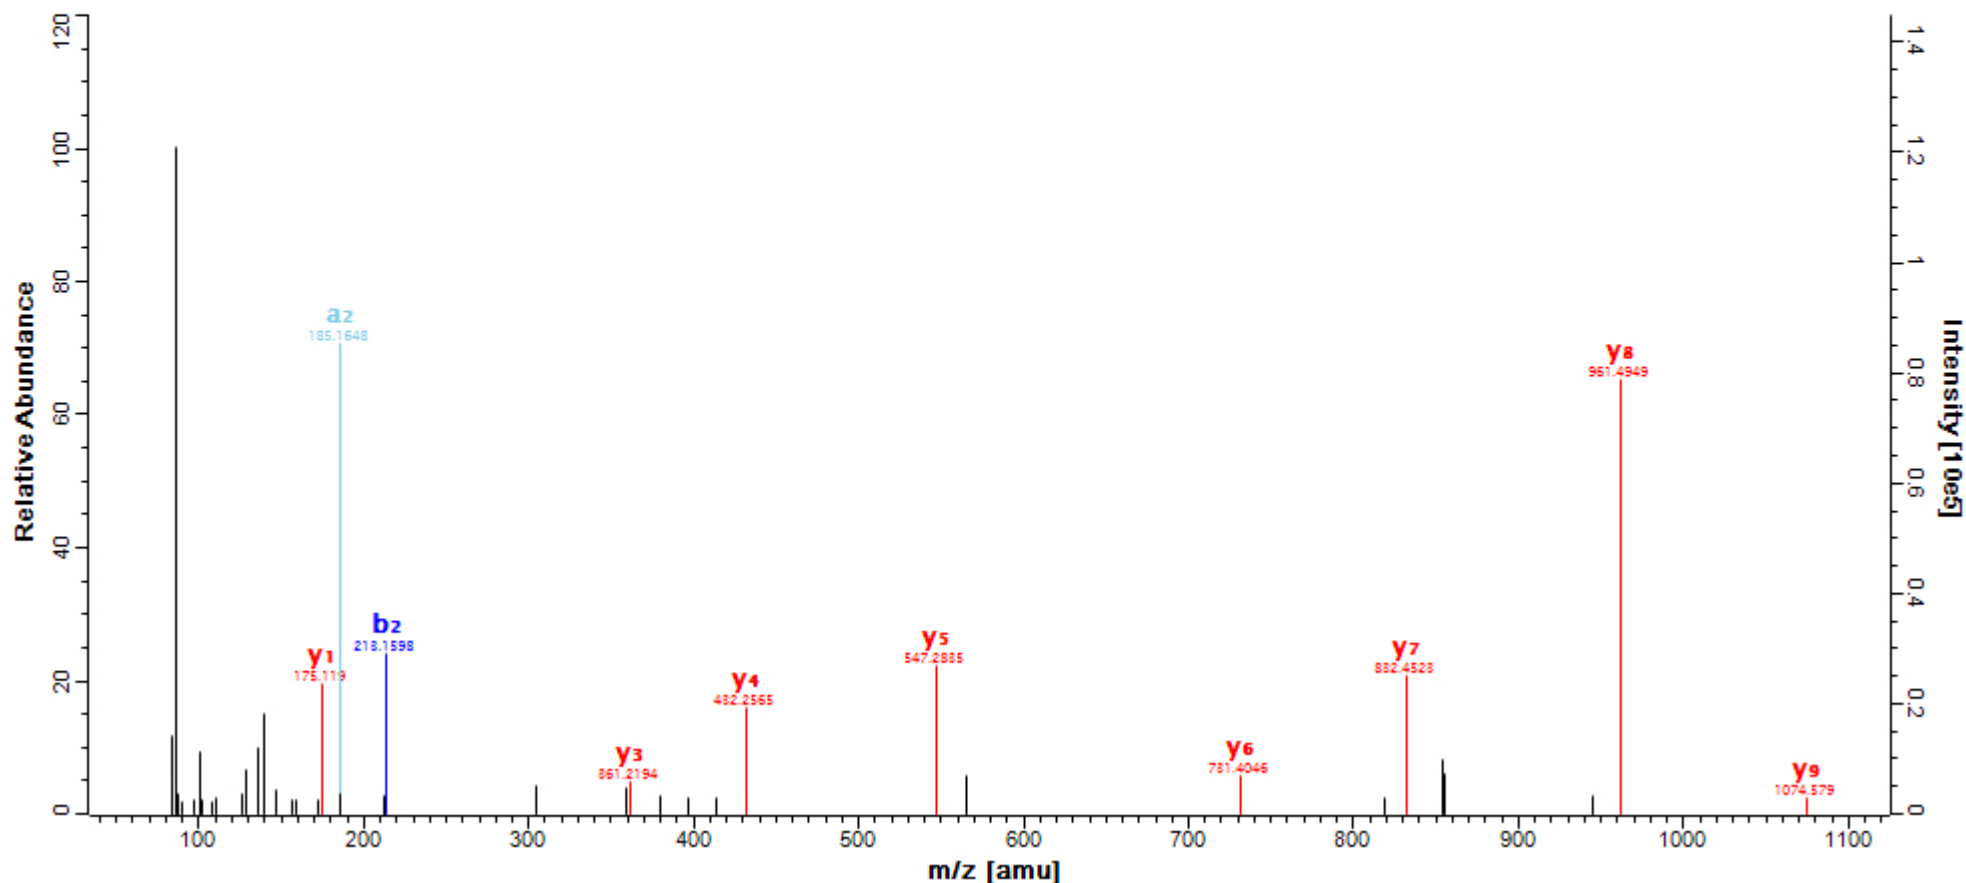

Scan number 3032  
Method FTMS; HCD

Raw file Kprop5  
Peptide 78.69

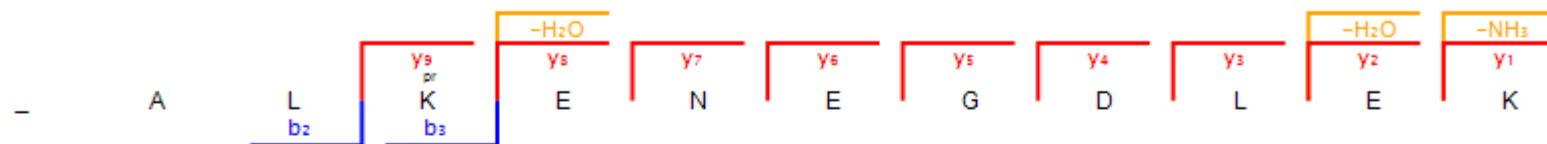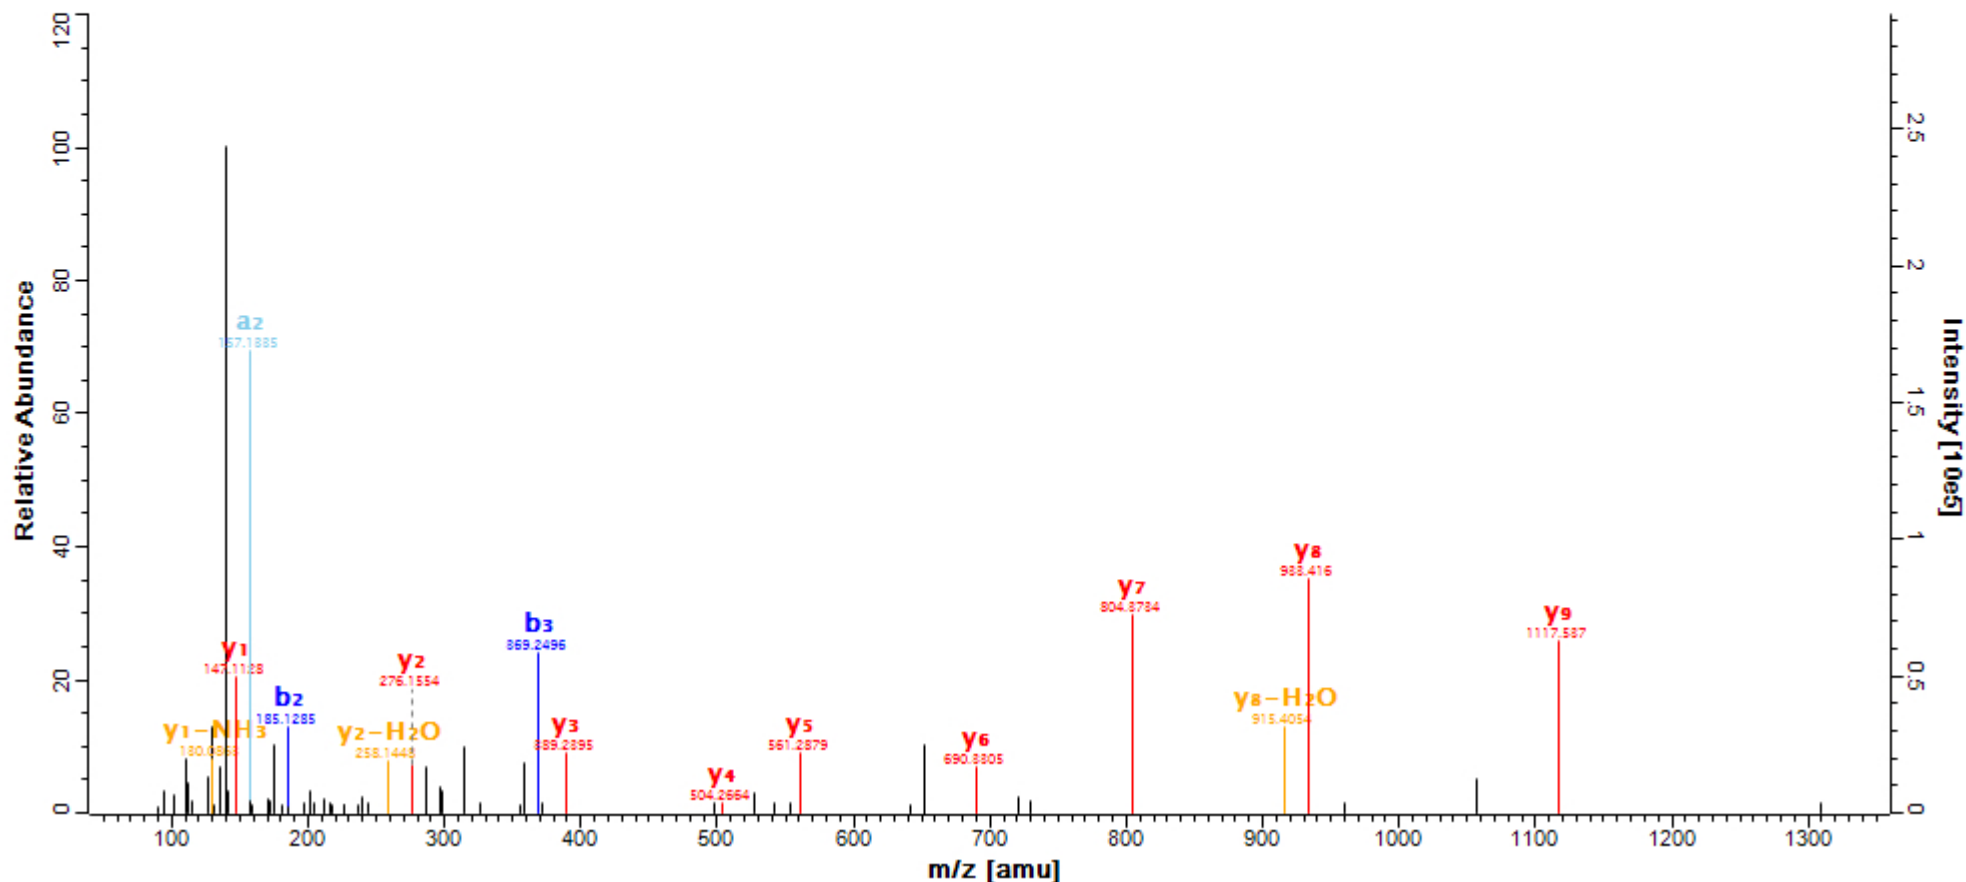

Scan number 3518  
Method FTMS; HCD

Raw file Kprop5  
Peptide 121.28

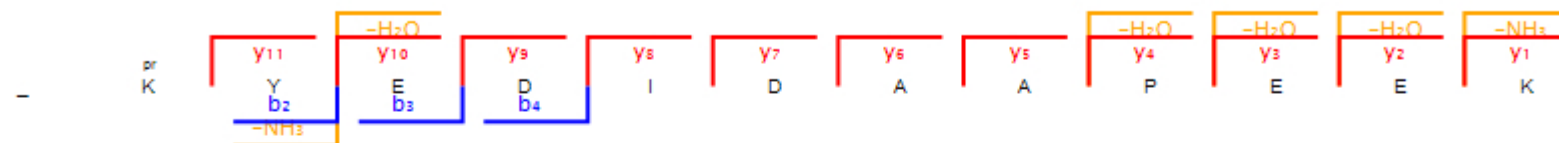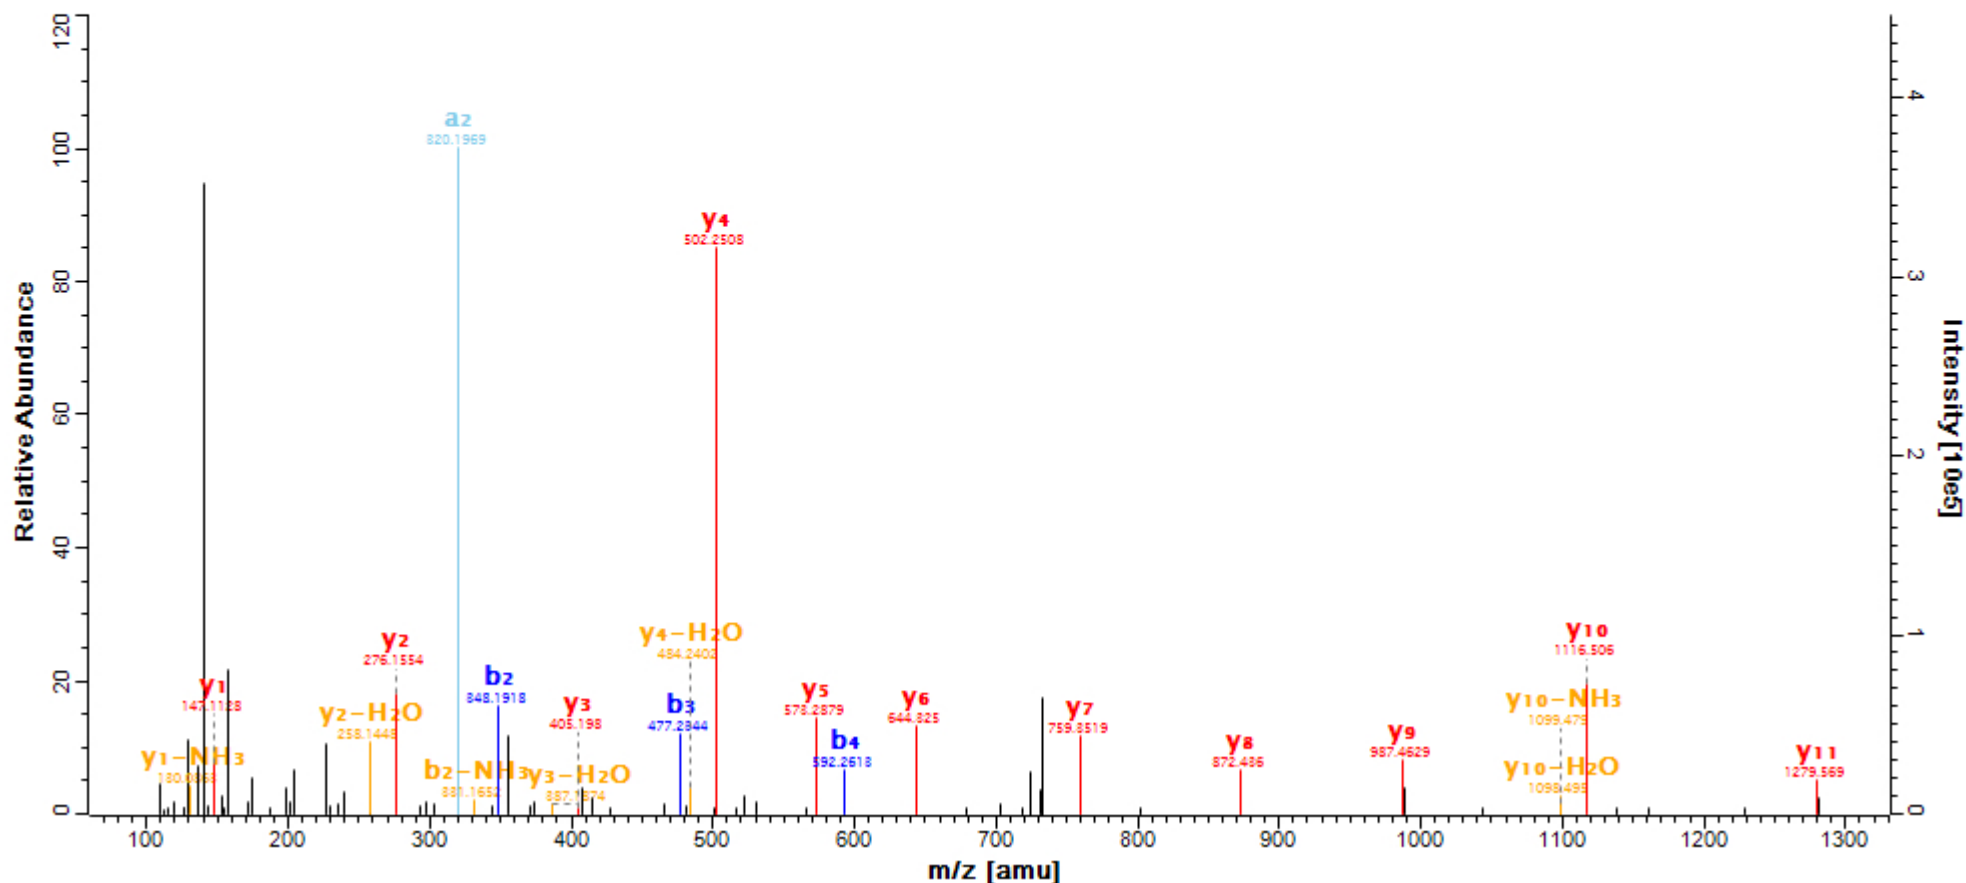

Scan number 3985 Raw file Kprop5  
Method FTMS; HCD Peptide 90.93

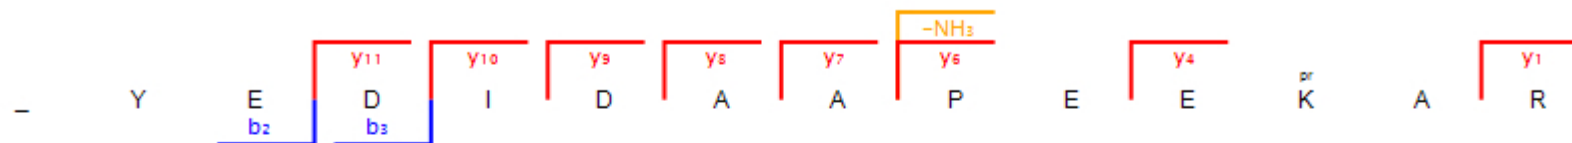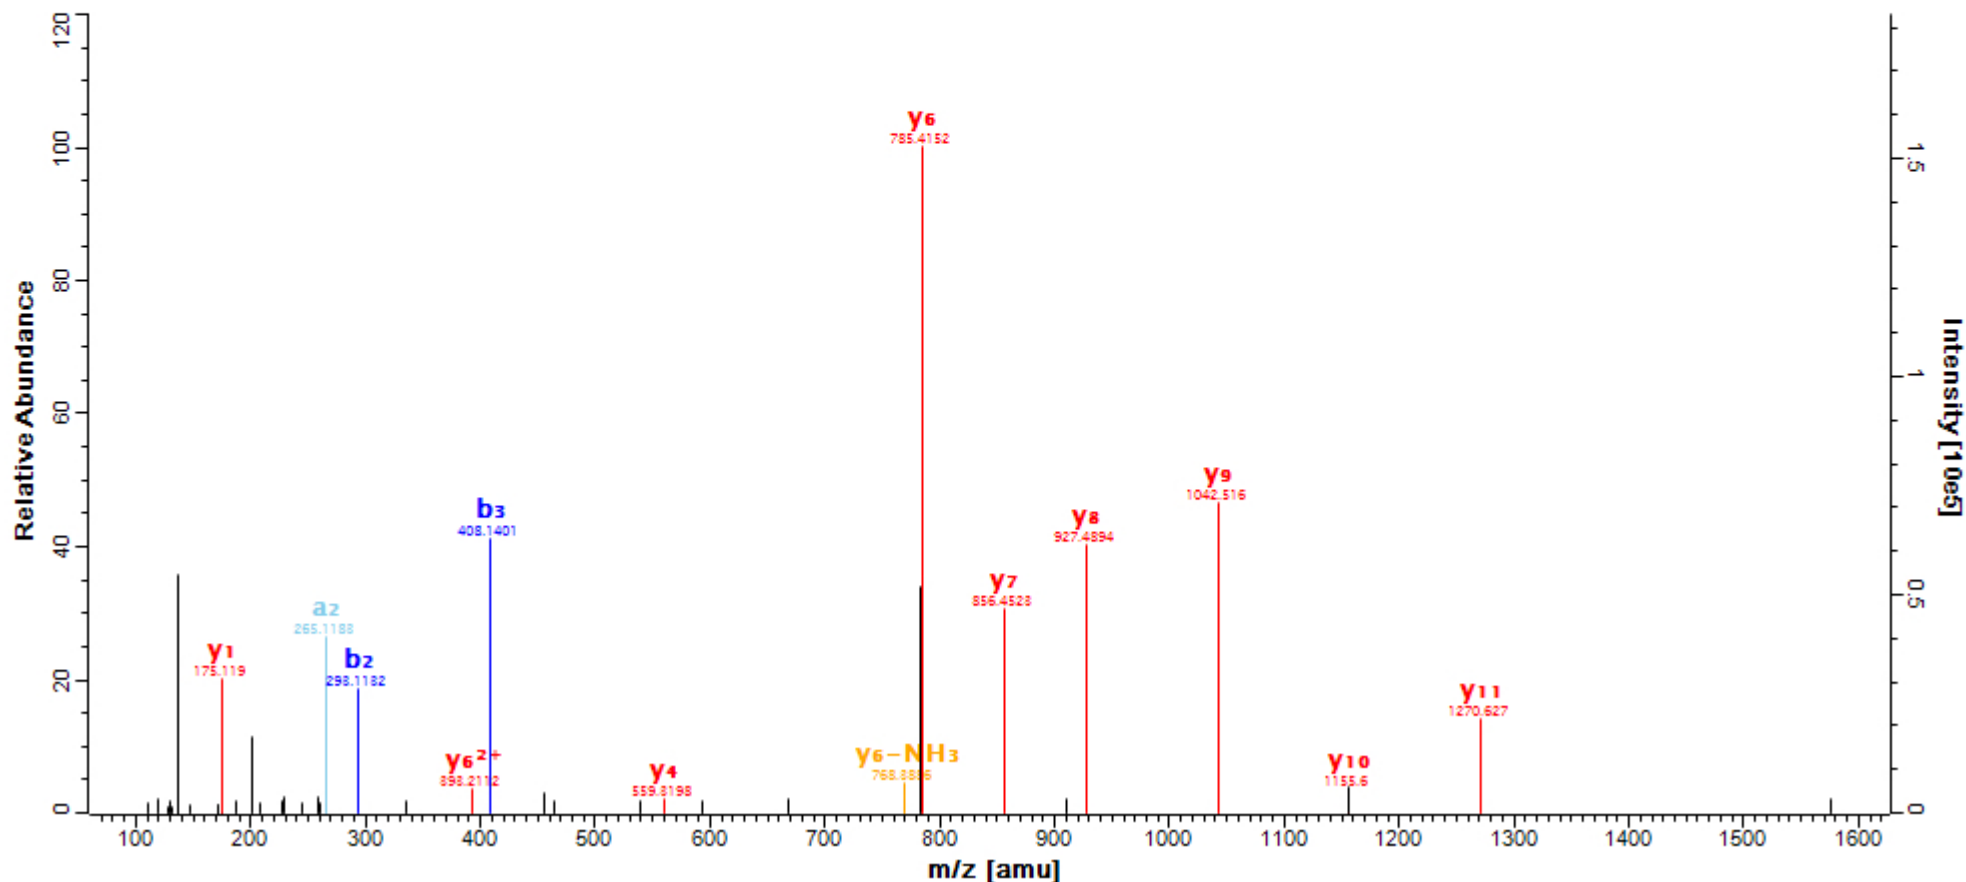

Scan number 4119  
Method FTMS; HCD

Raw file Kprop5  
Peptide 95.02

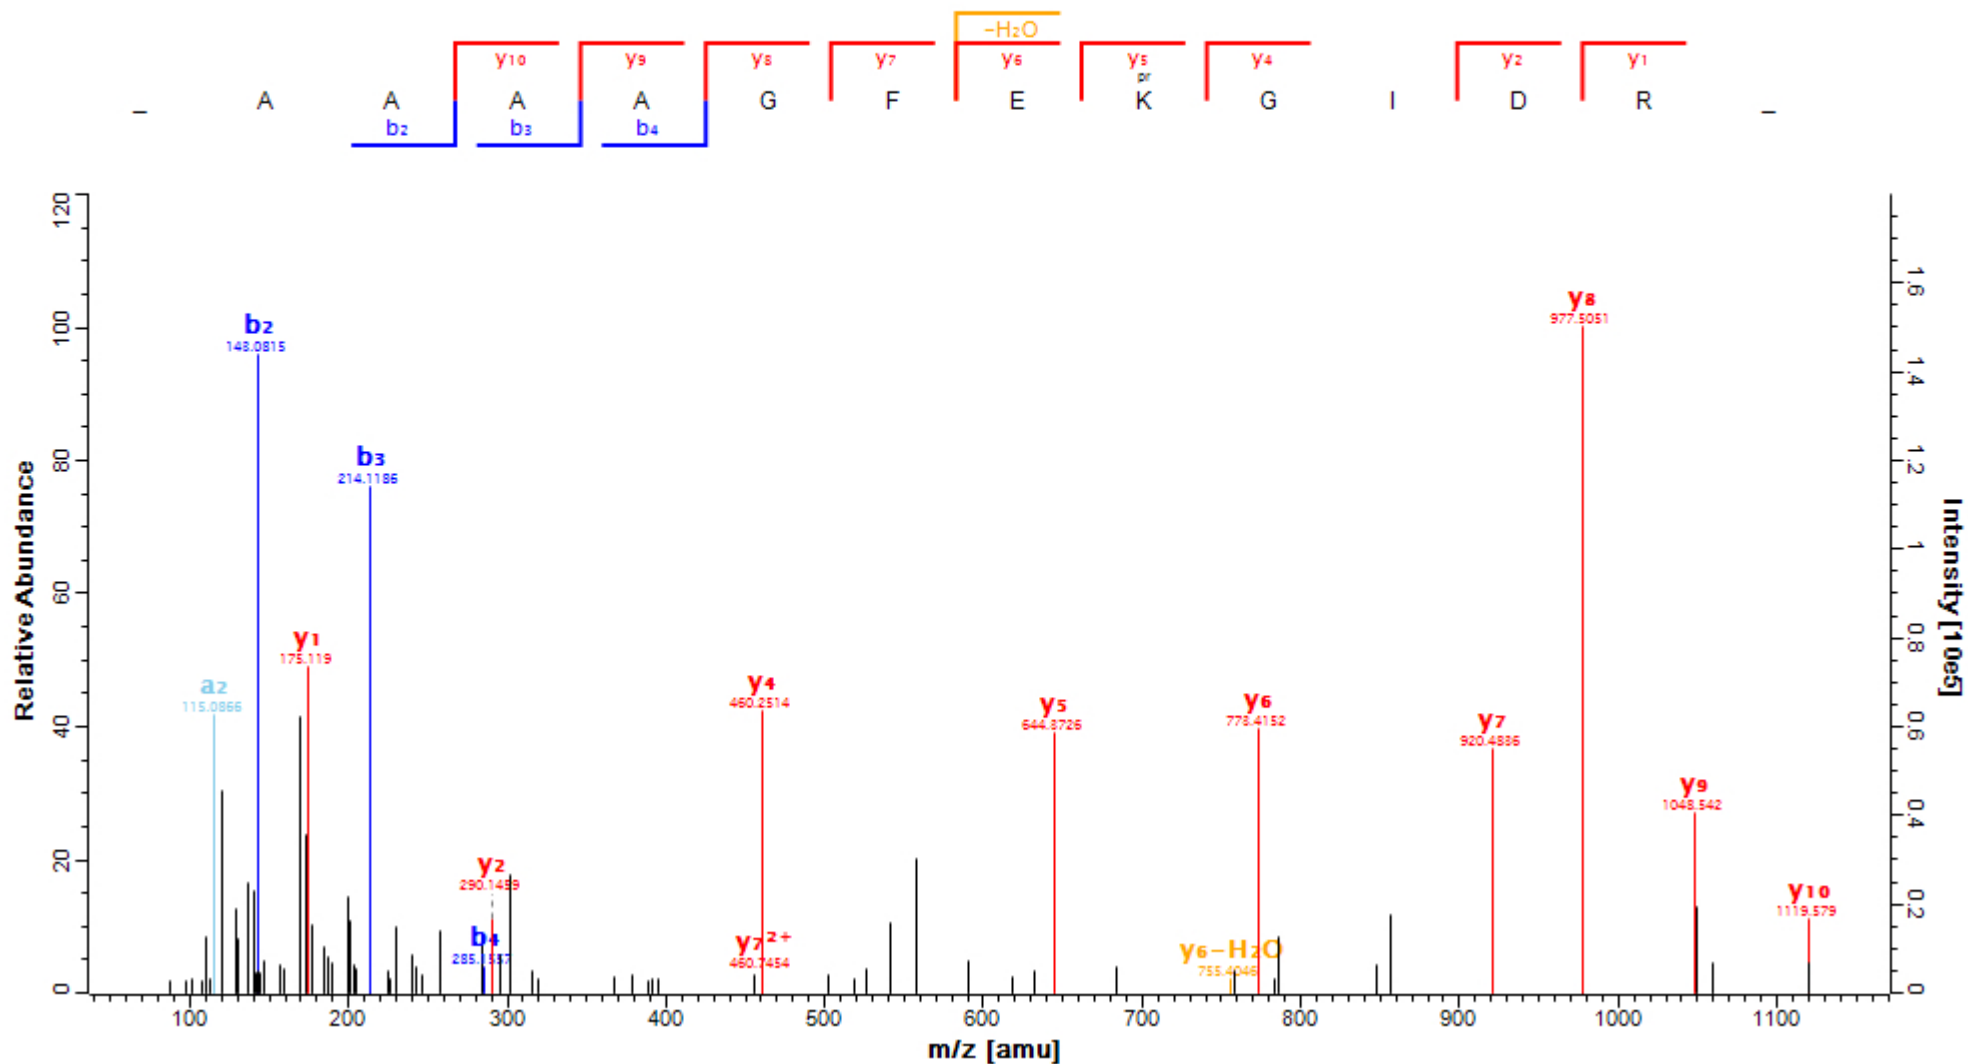

Scan number 4563  
Method FTMS; HCD

Raw file Kprop5  
Peptide 82.17

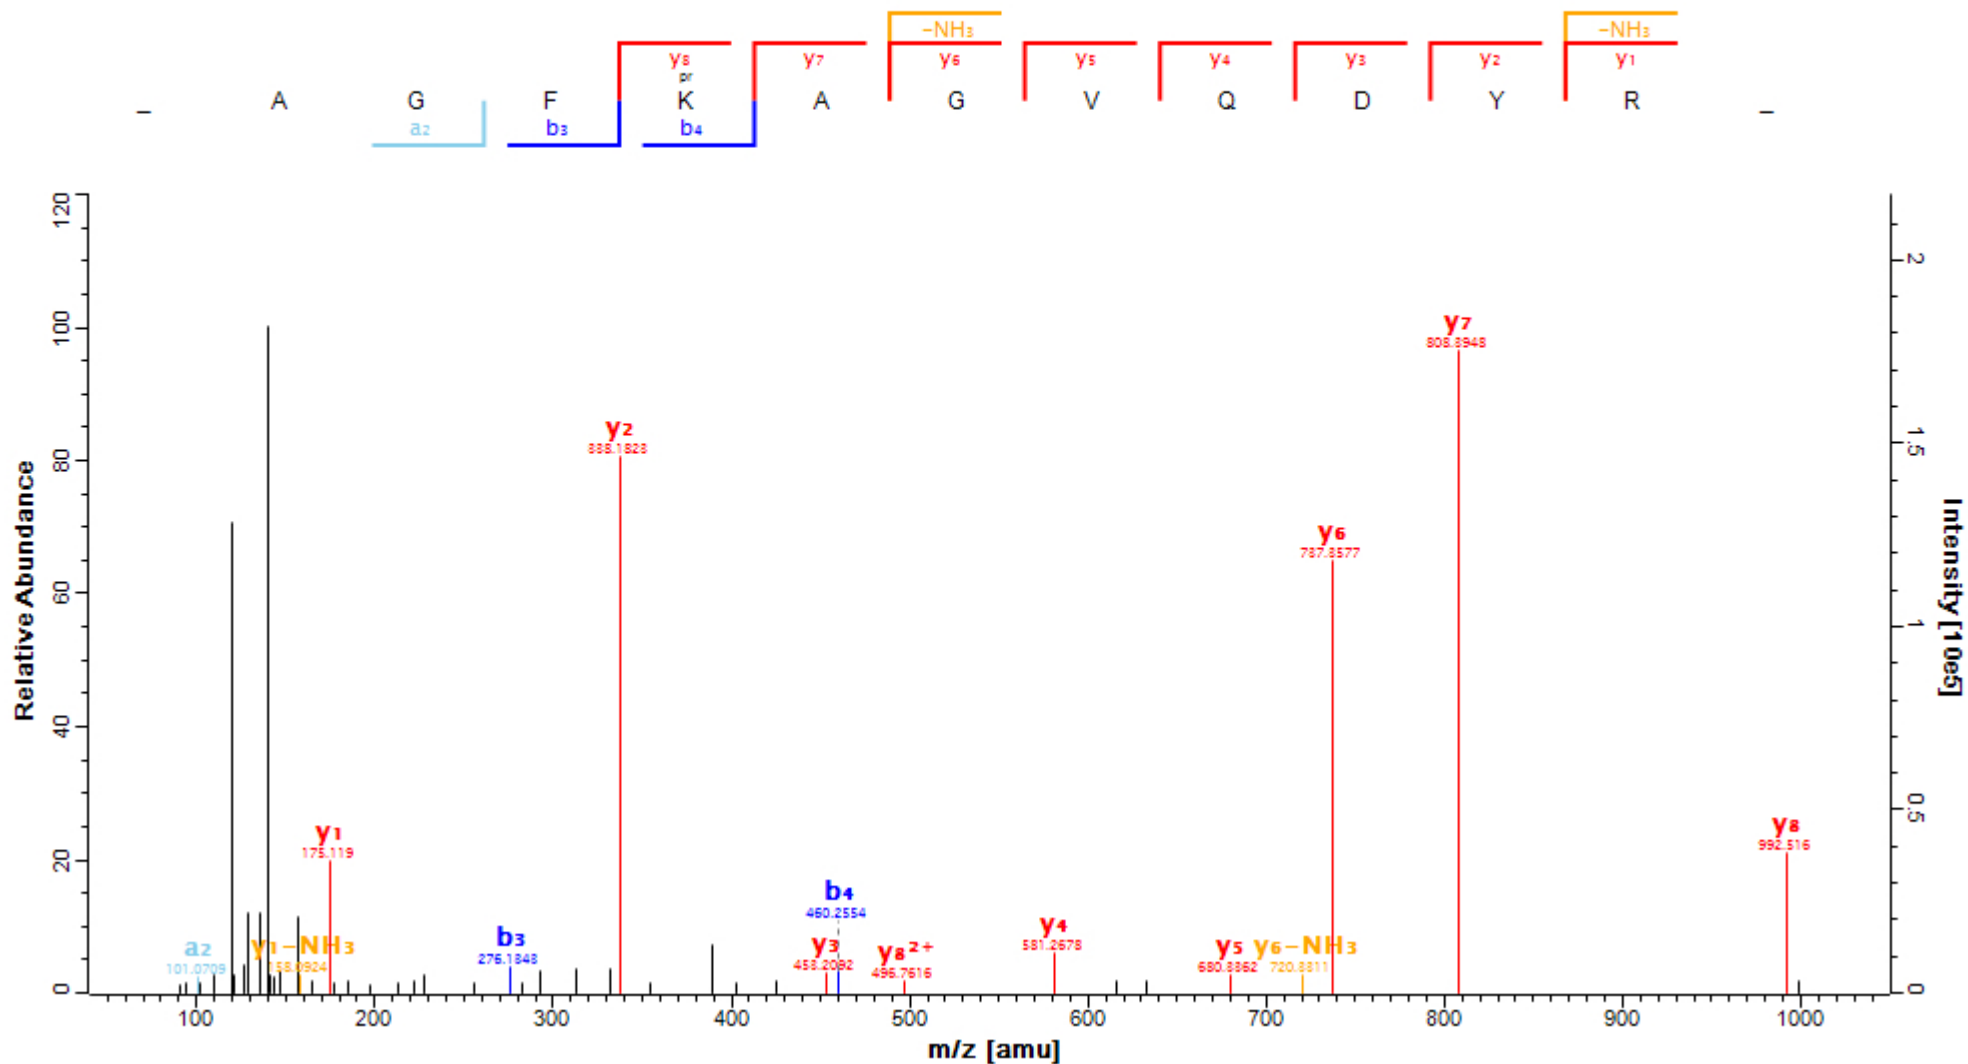

Scan number 4576 Raw file Kprop5  
Method FTMS; HCD Peptide 142.01

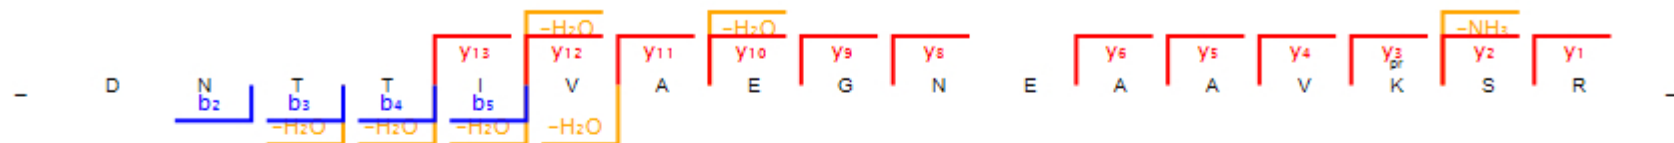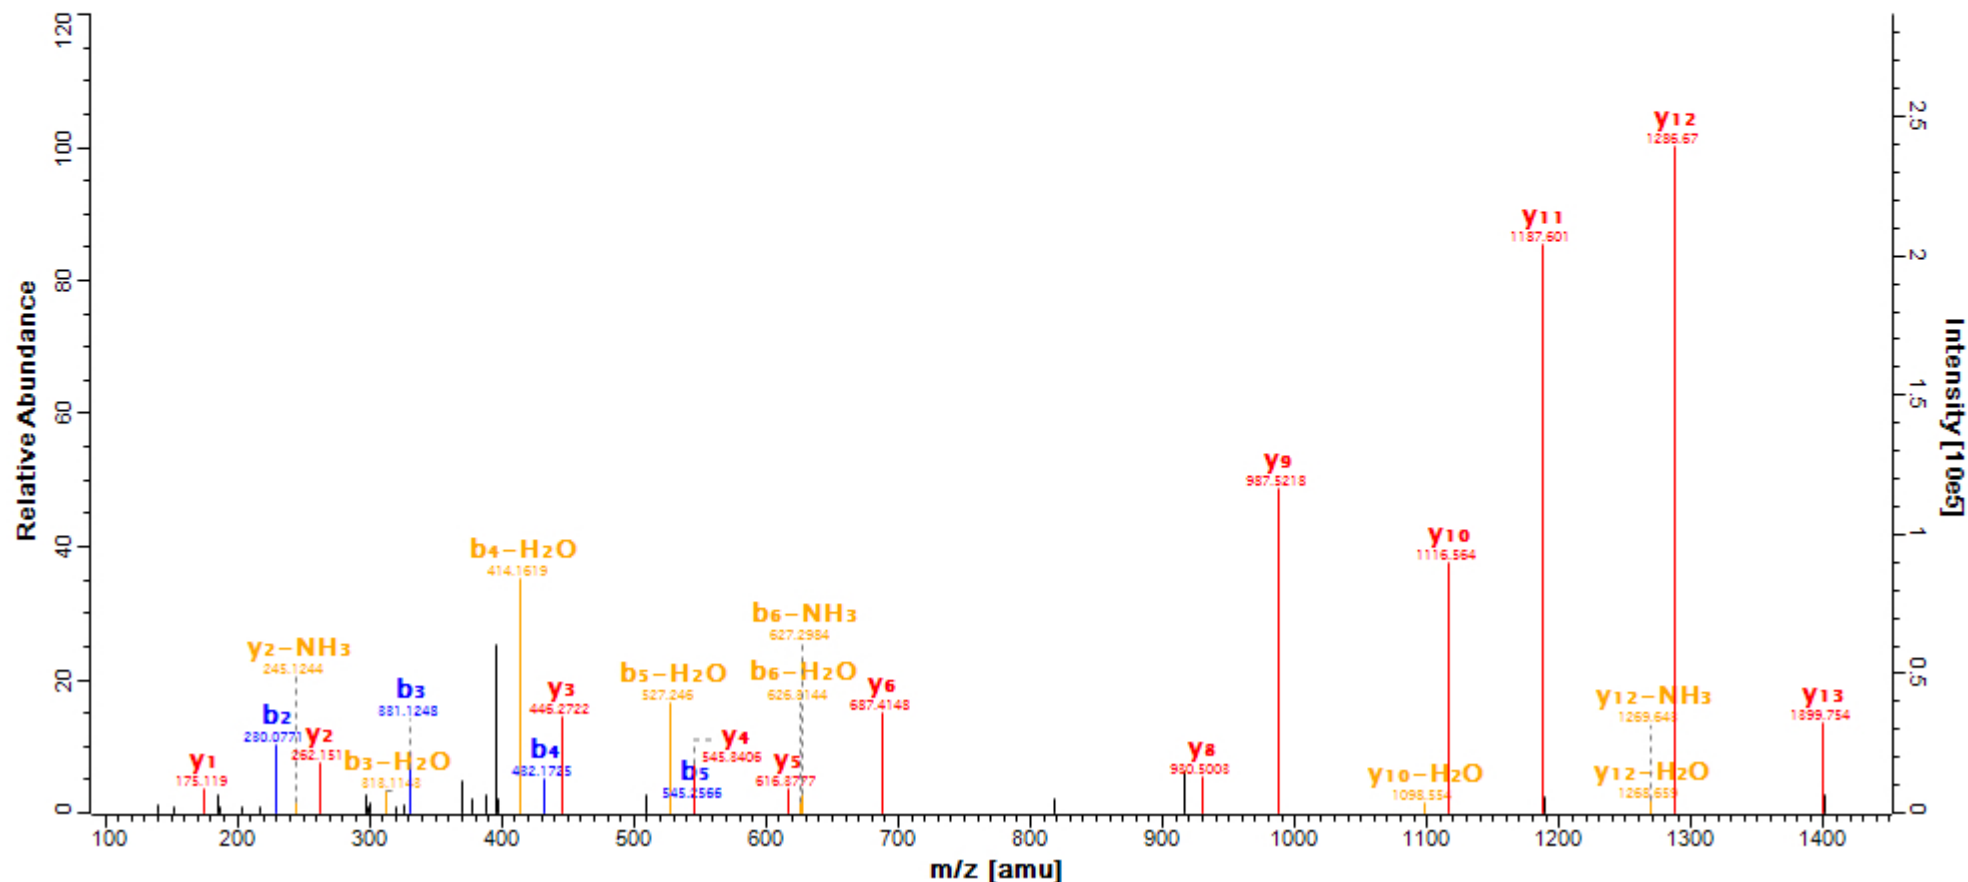



Scan number 4701  
Method FTMS; HCD

Raw file Kprop5  
Peptide 72.55

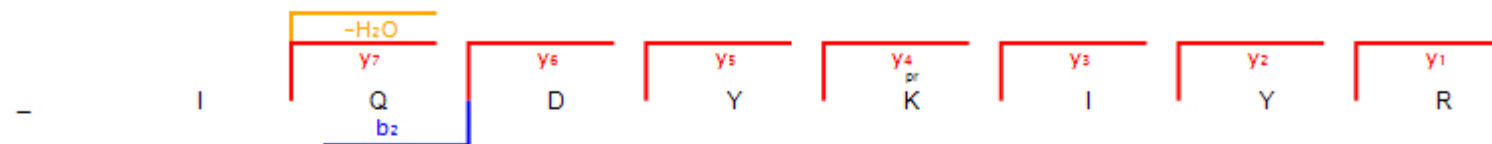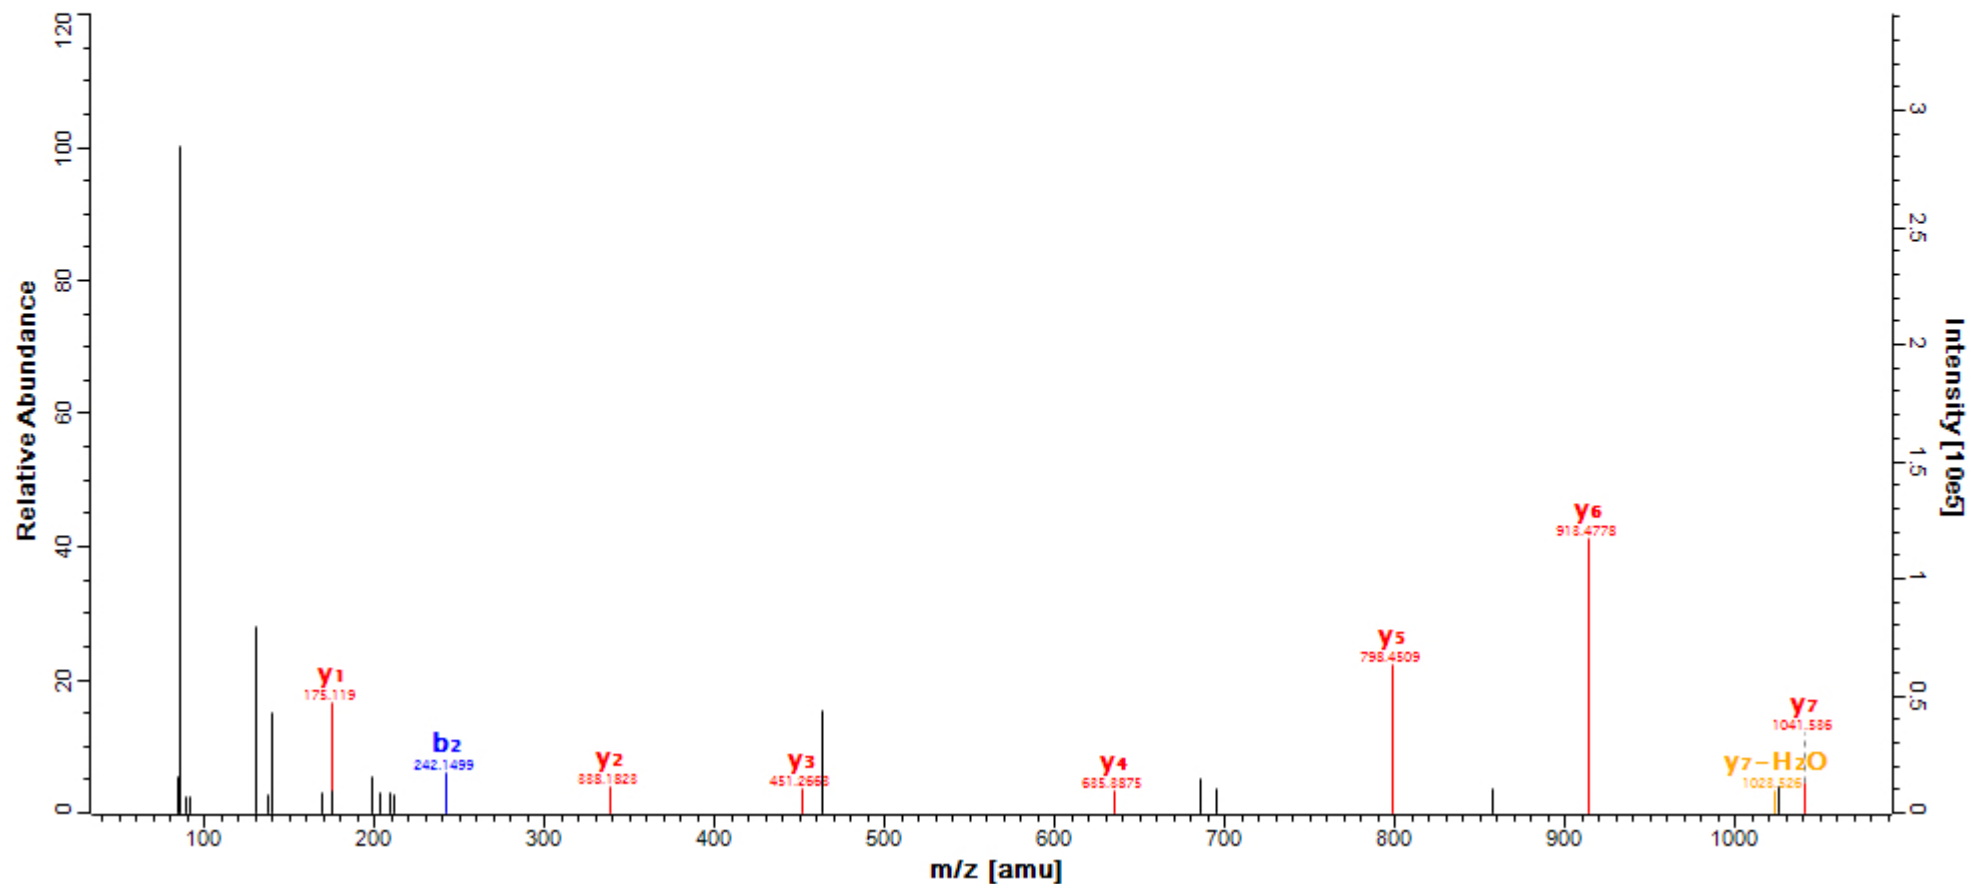

Scan number 5213 Raw file Kprop5  
 Method FTMS; HCD Peptide 117.4

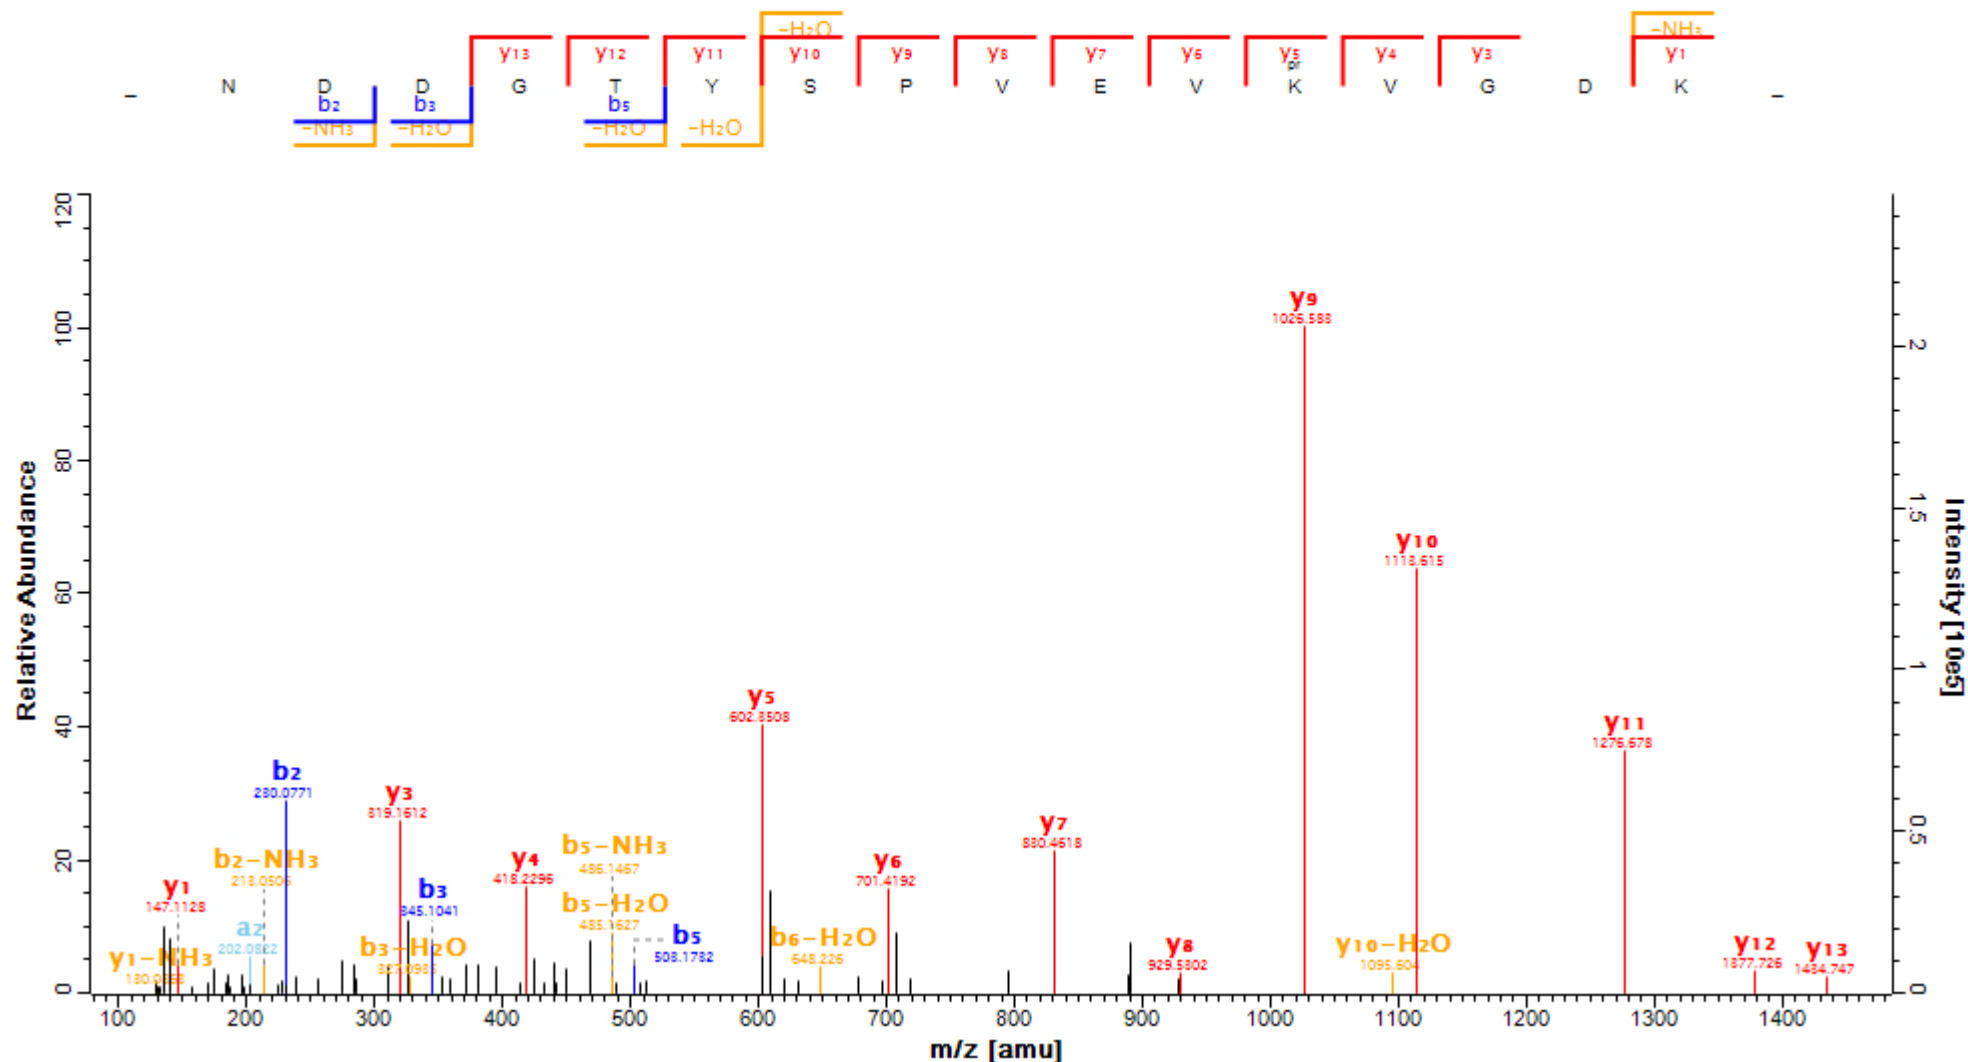

Scan number 5240 Raw file Kprop5  
Method FTMS; HCD Peptide 85.81

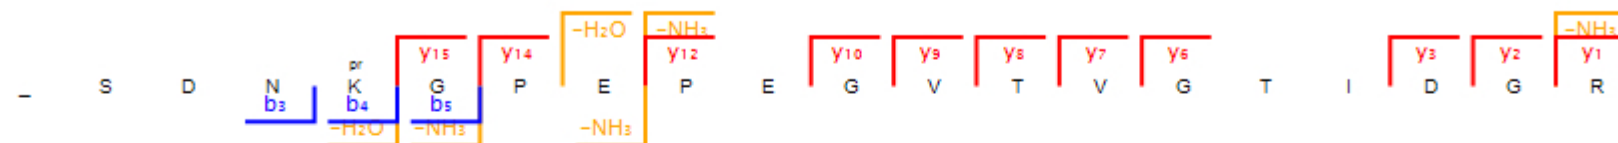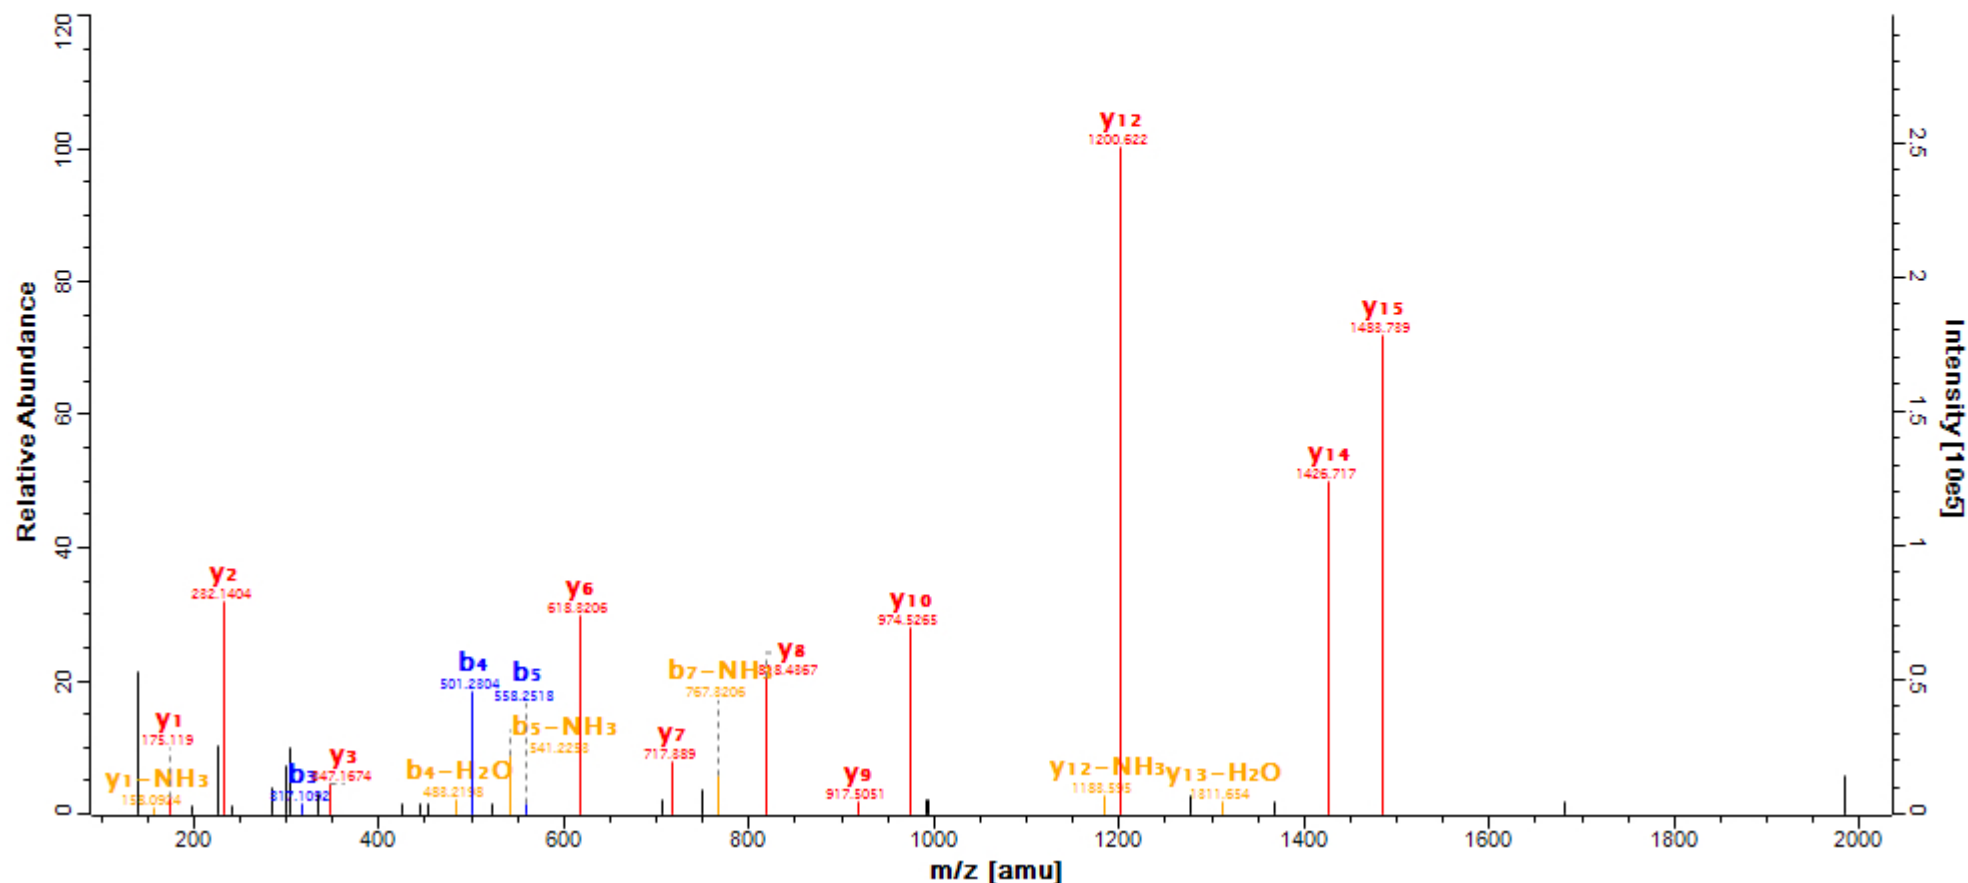

Scan number 5471 Raw file Kprop5  
 Method FTMS; HCD Peptide 94.73

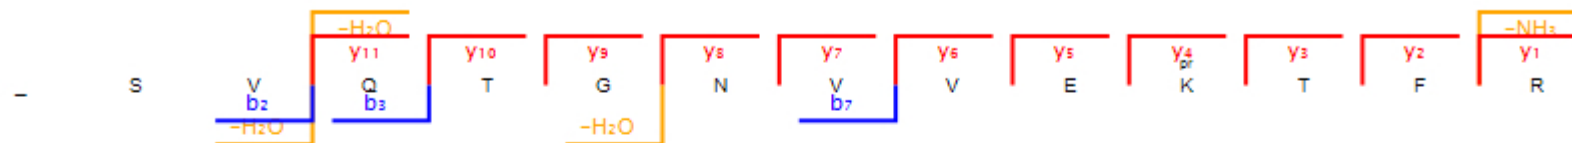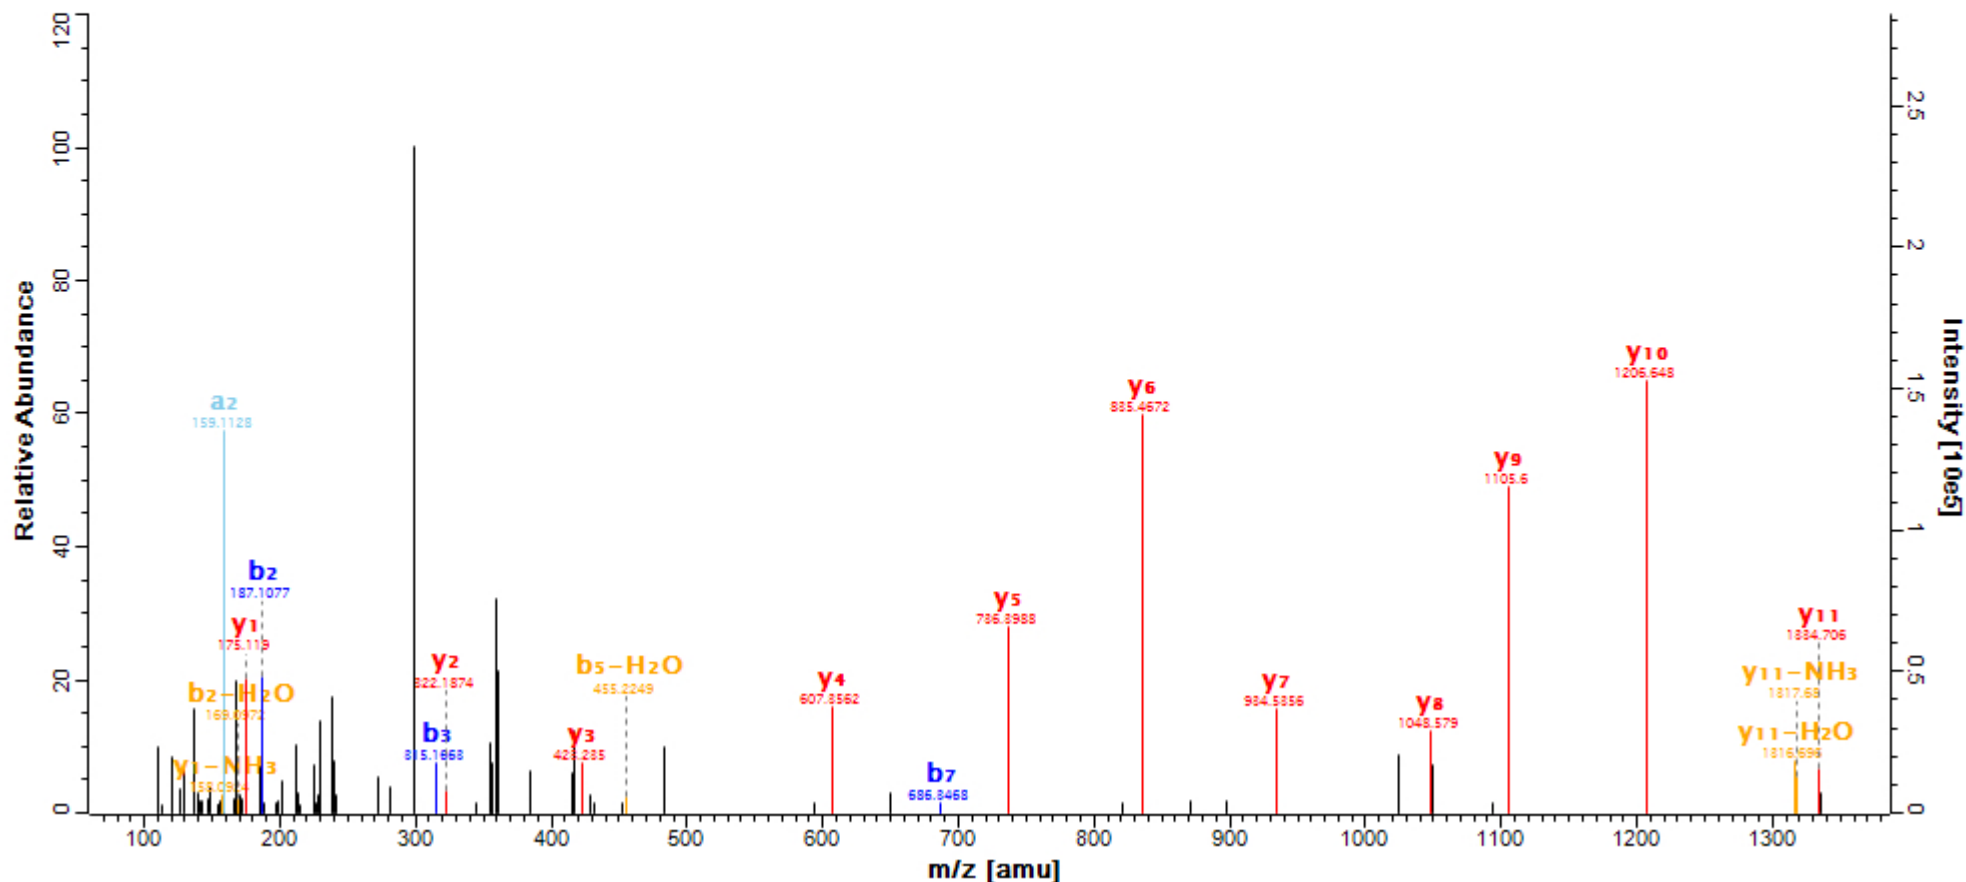

Scan number 5607  
Method FTMS; HCD

Raw file Kprop5  
Peptide 120.87

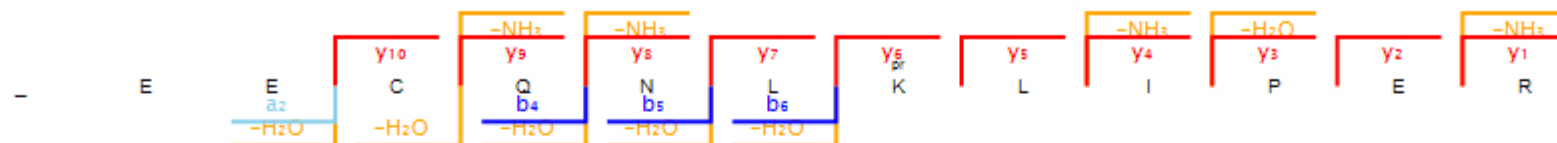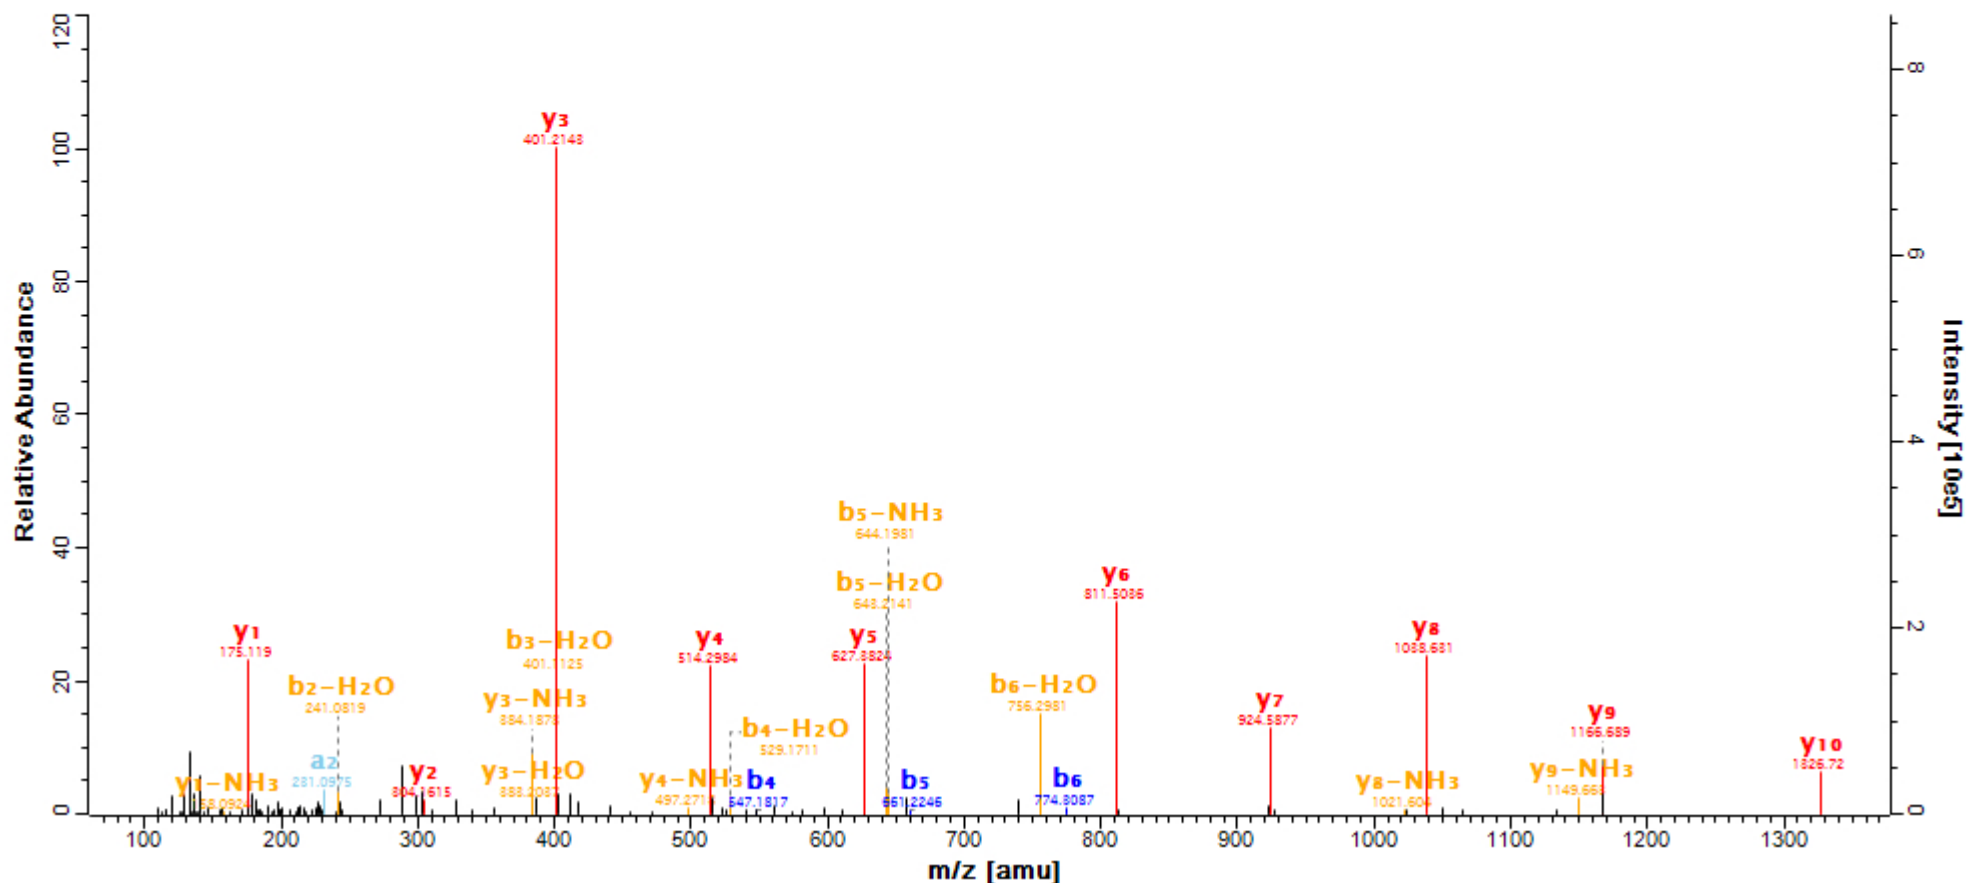

Scan number 5804  
Method FTMS; HCD

Raw file Kprop5  
Peptide 51.8

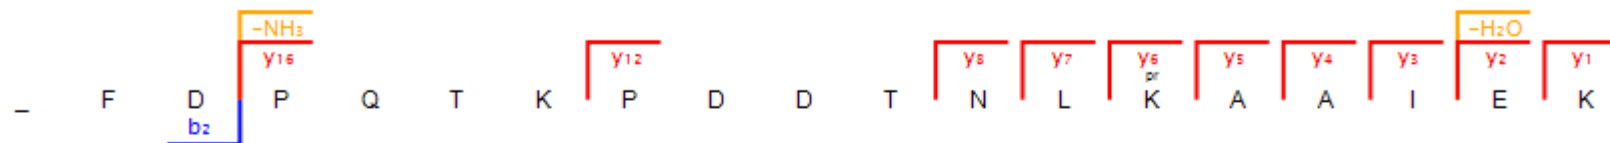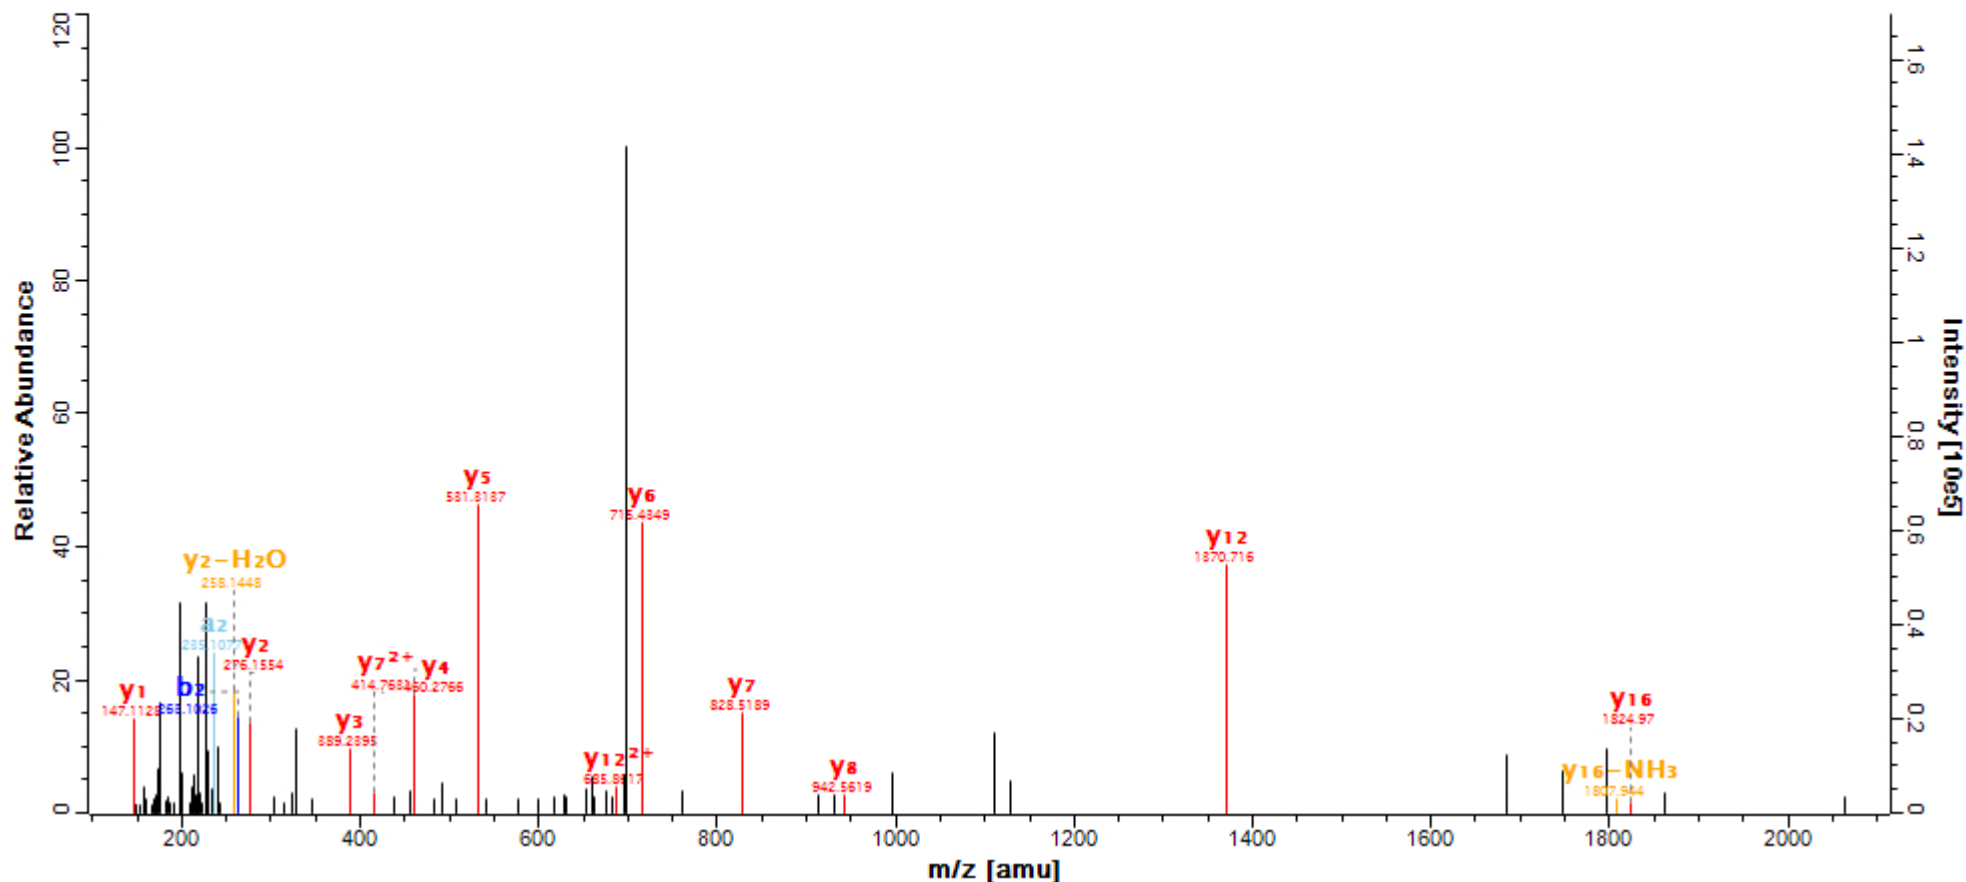

Scan number 5911  
Method FTMS; HCD

Raw file Kprop5  
Peptide 120.7

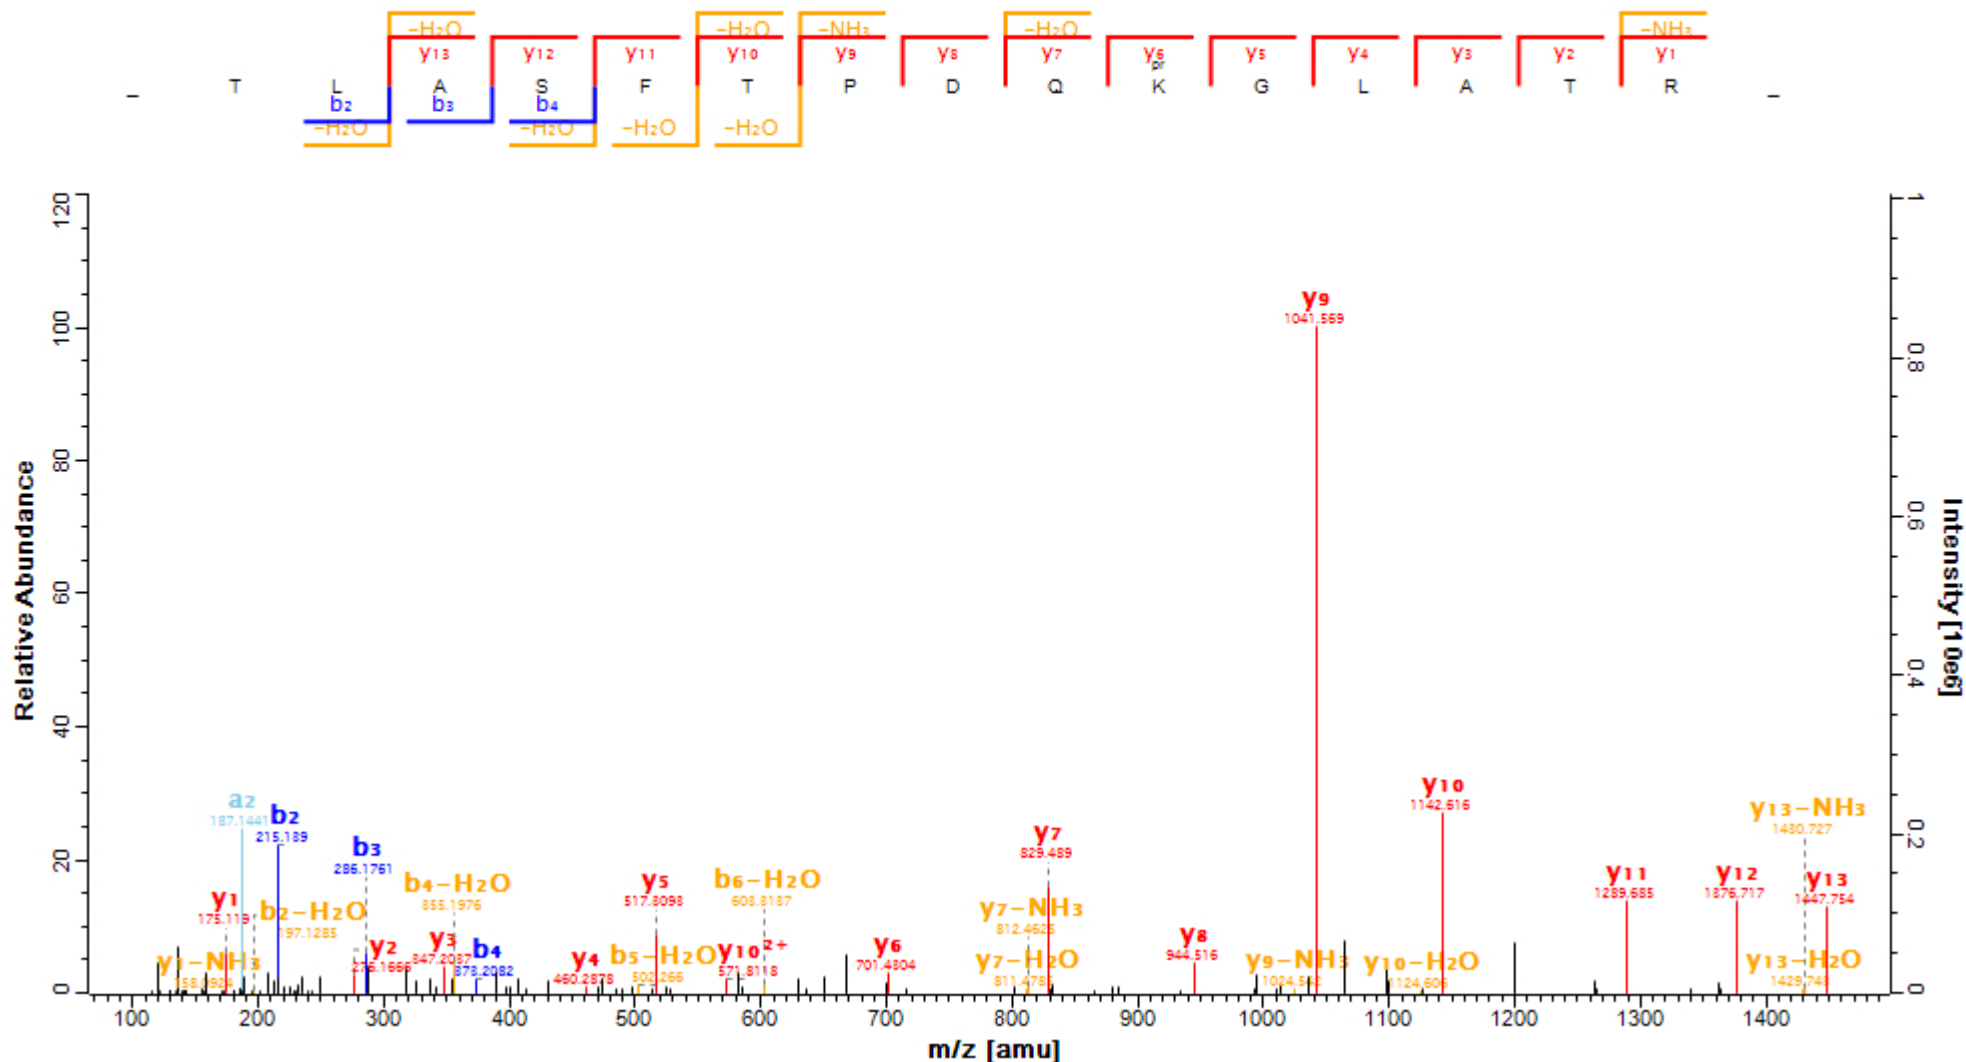

Scan number 5920 Raw file Kprop5  
 Method FTMS; HCD Peptide 68.33

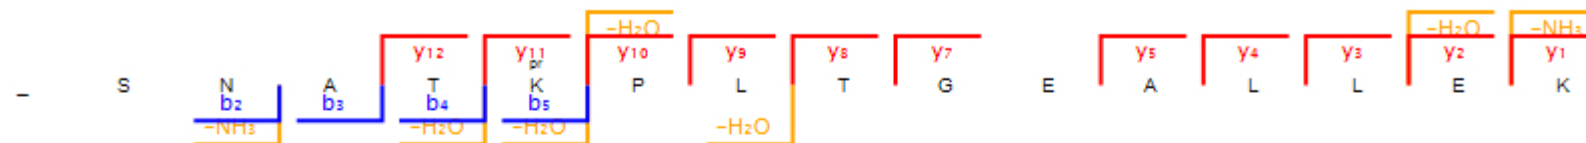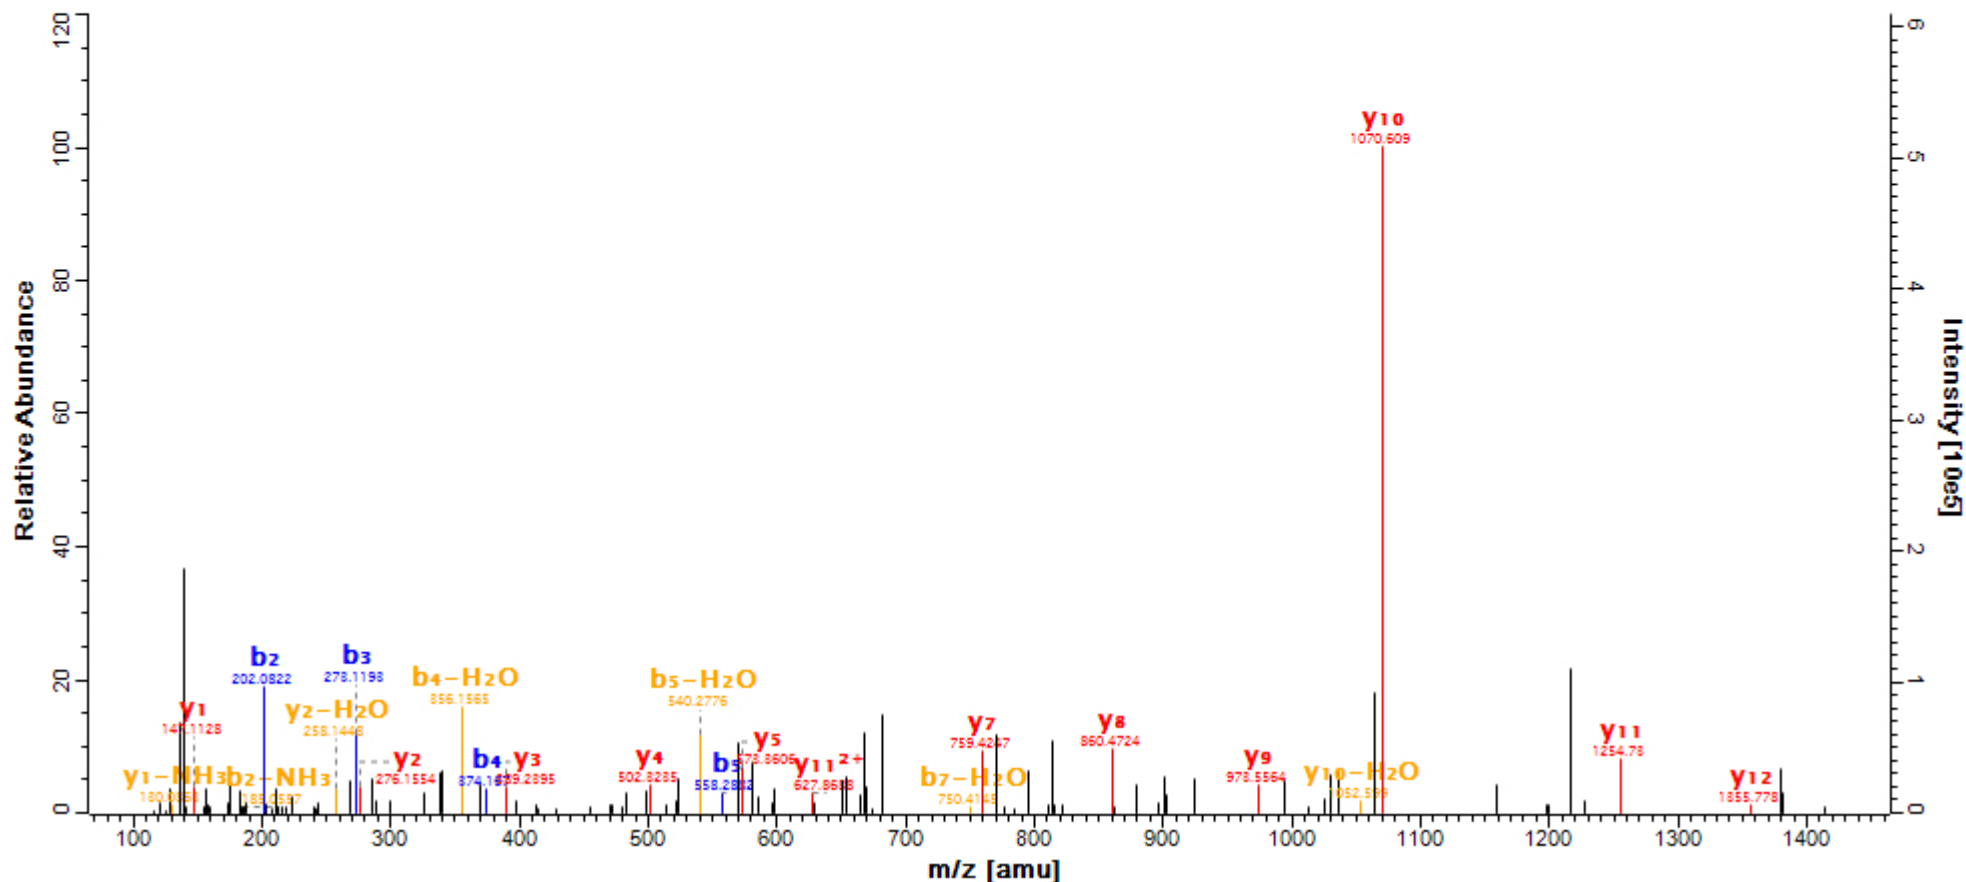



Scan number 5983  
Method FTMS; HCD

Raw file Kprop5  
Peptide 89.75

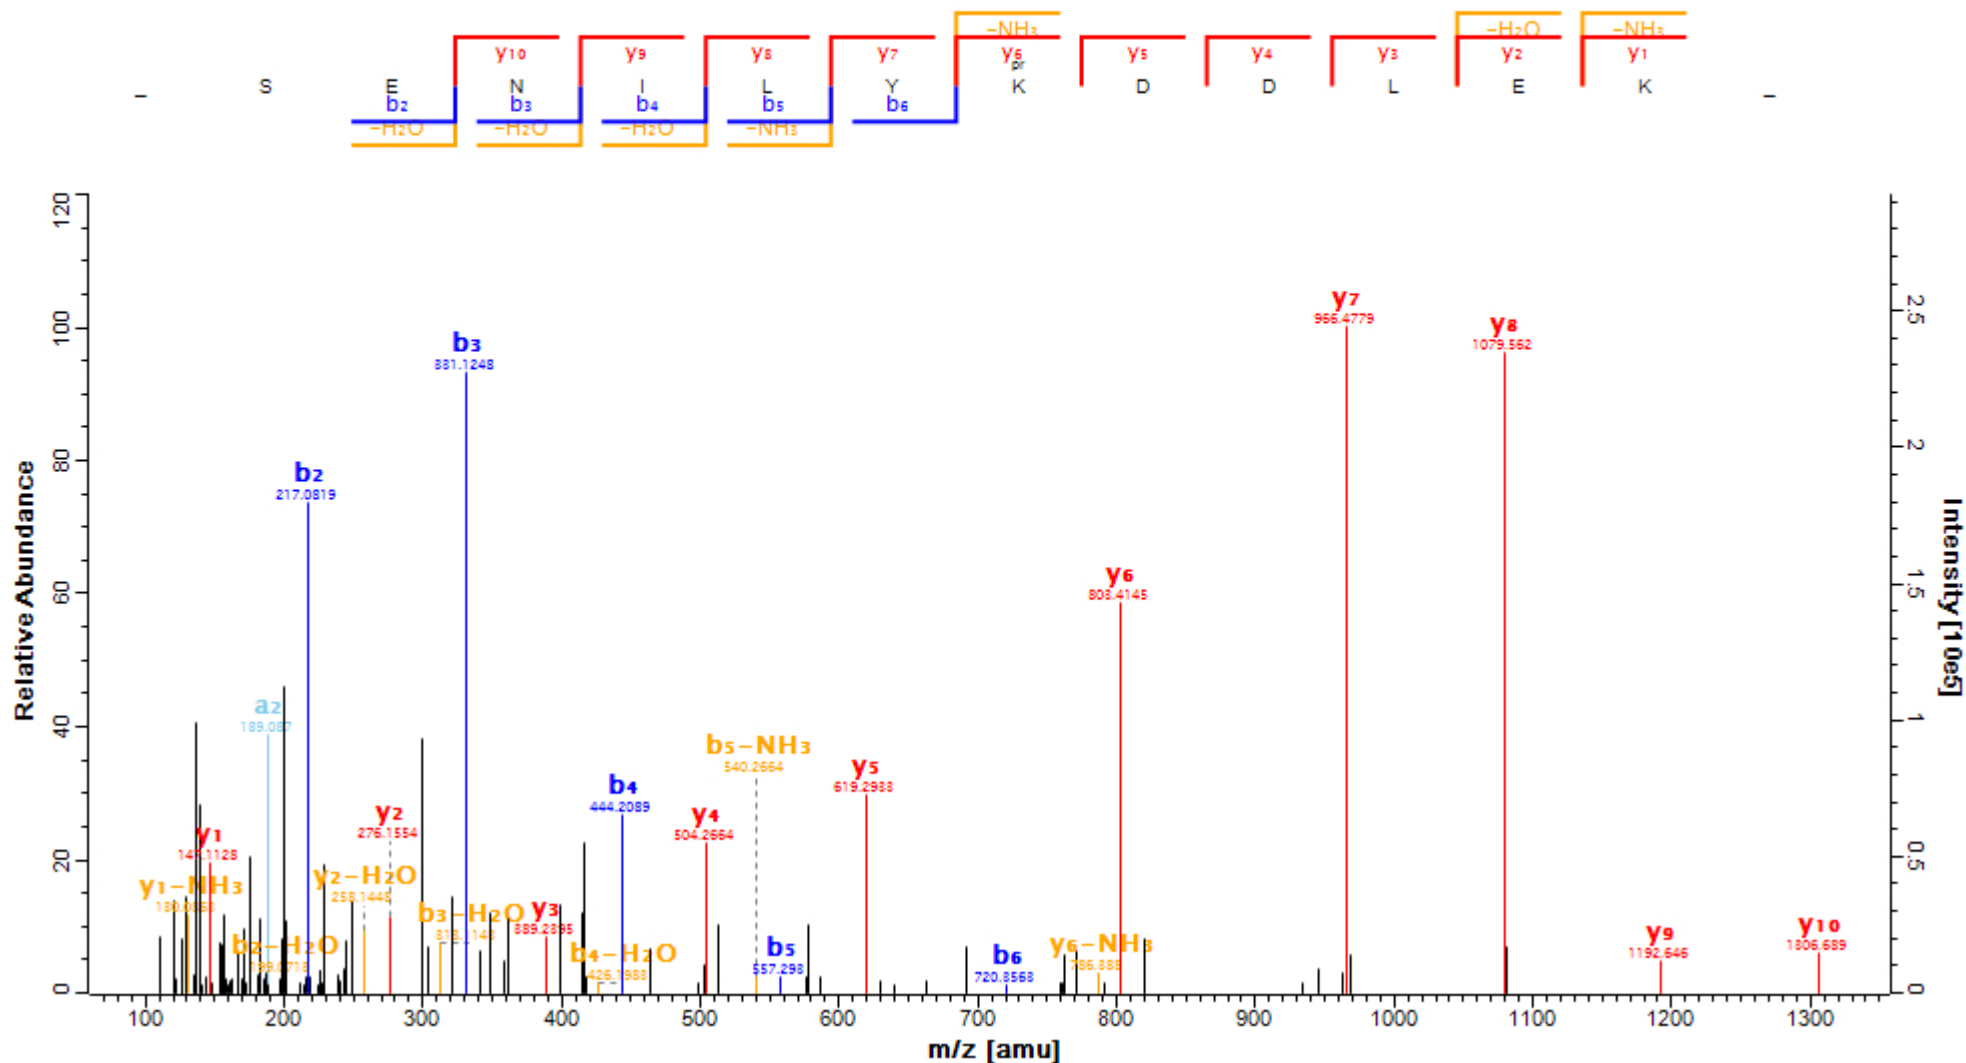

Scan number 6160 Raw file Kprop5  
Method FTMS; HCD Peptide 86.64

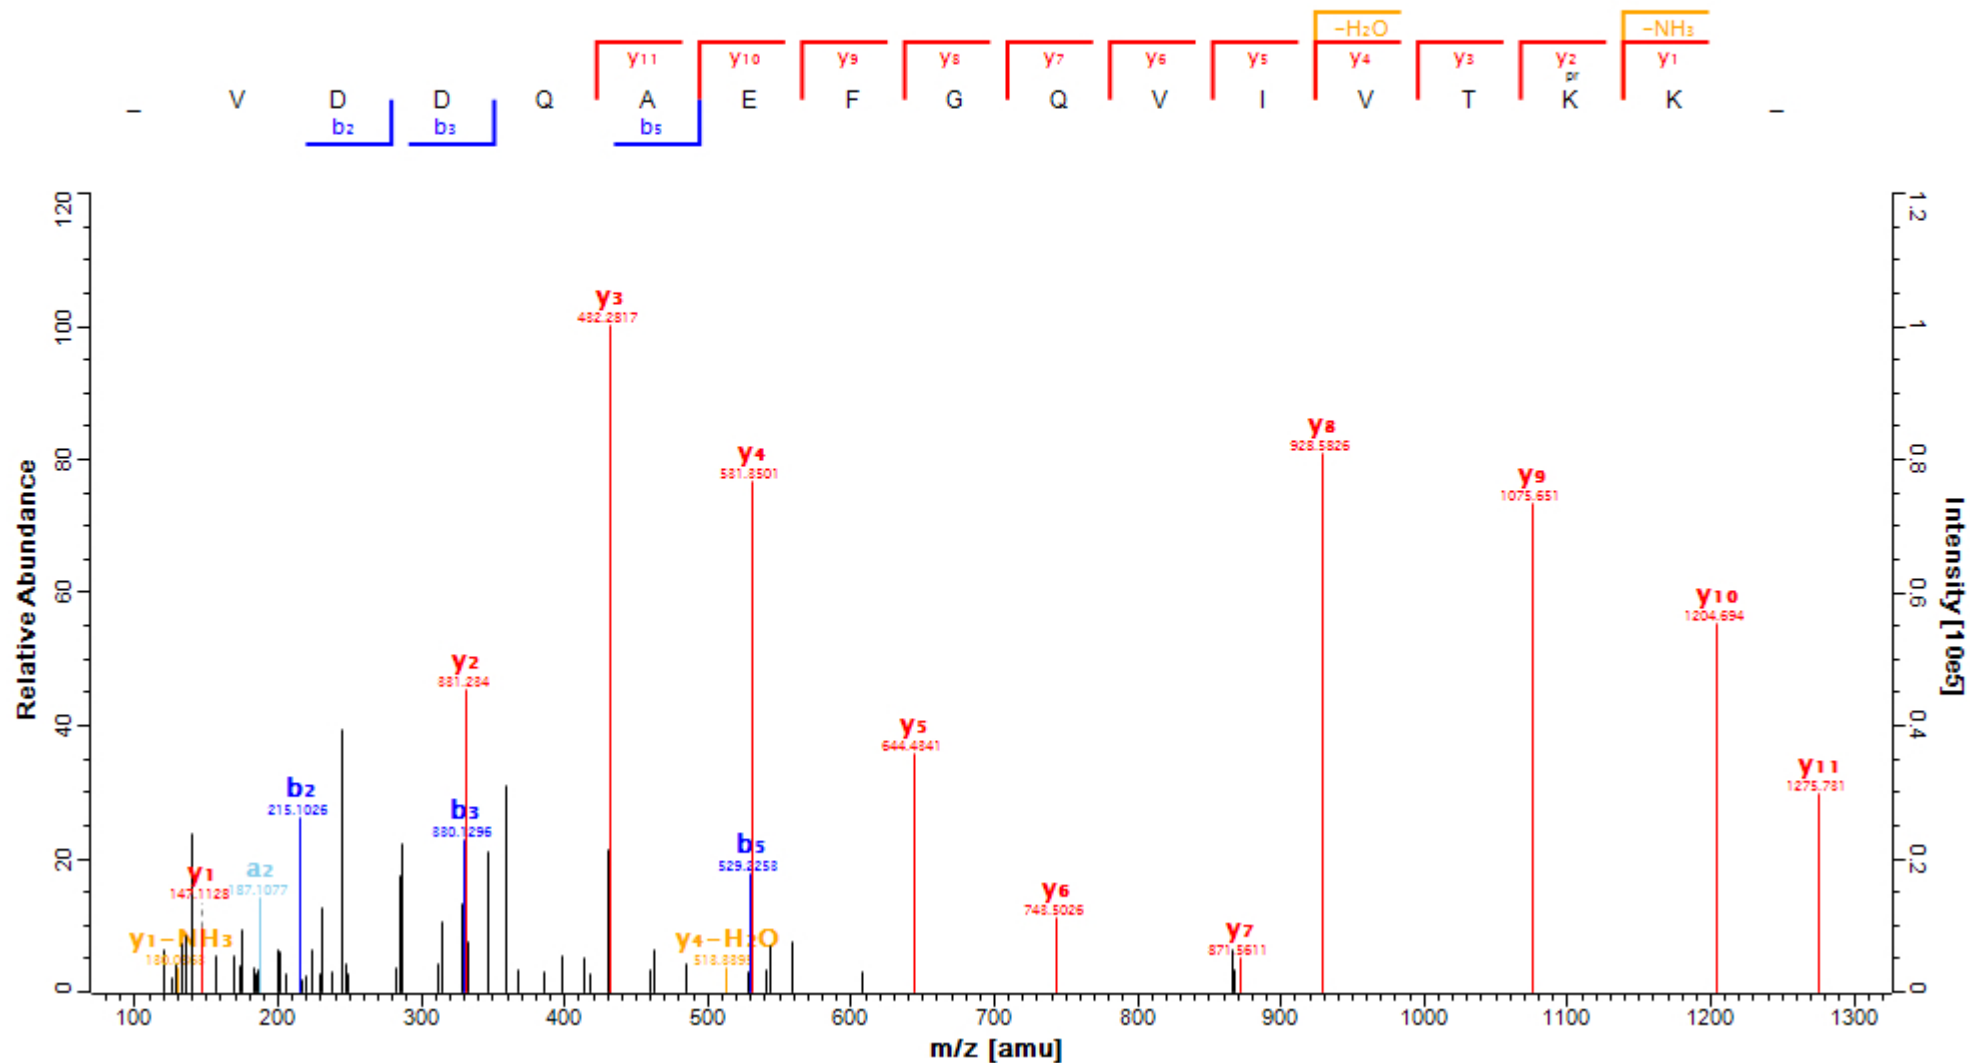

Scan number 6860 Raw file Kprop5  
 Method FTMS; HCD Peptide 70.28

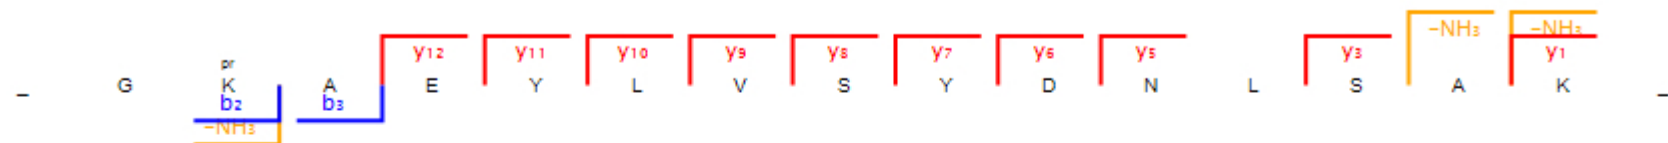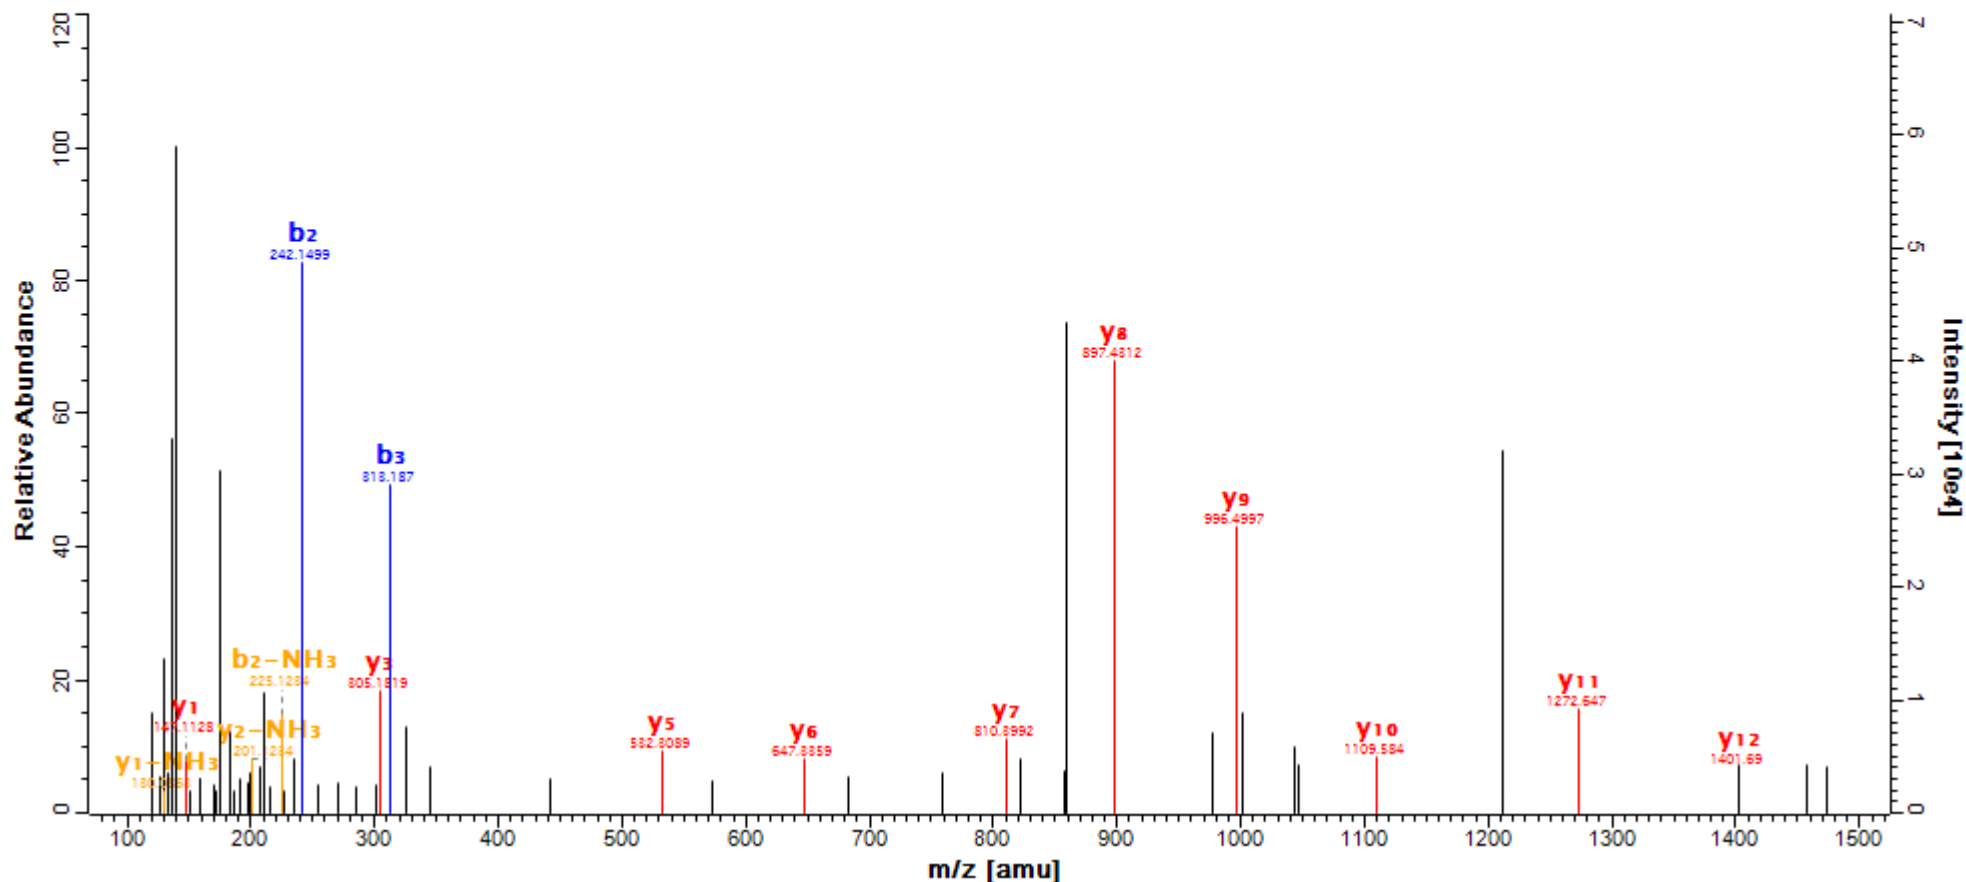

|          |        |
|----------|--------|
| Raw file | Kprop5 |
| Pepti... | 128.17 |

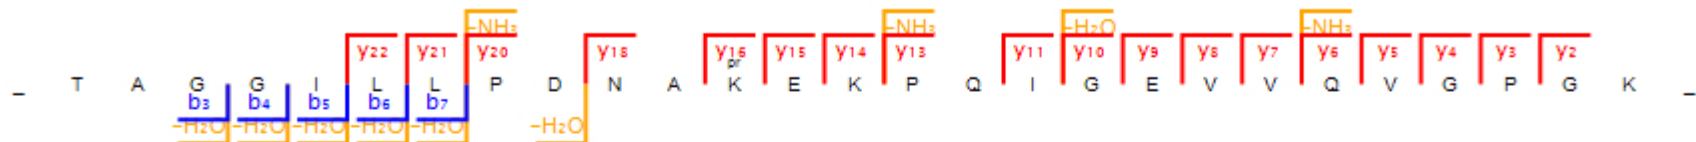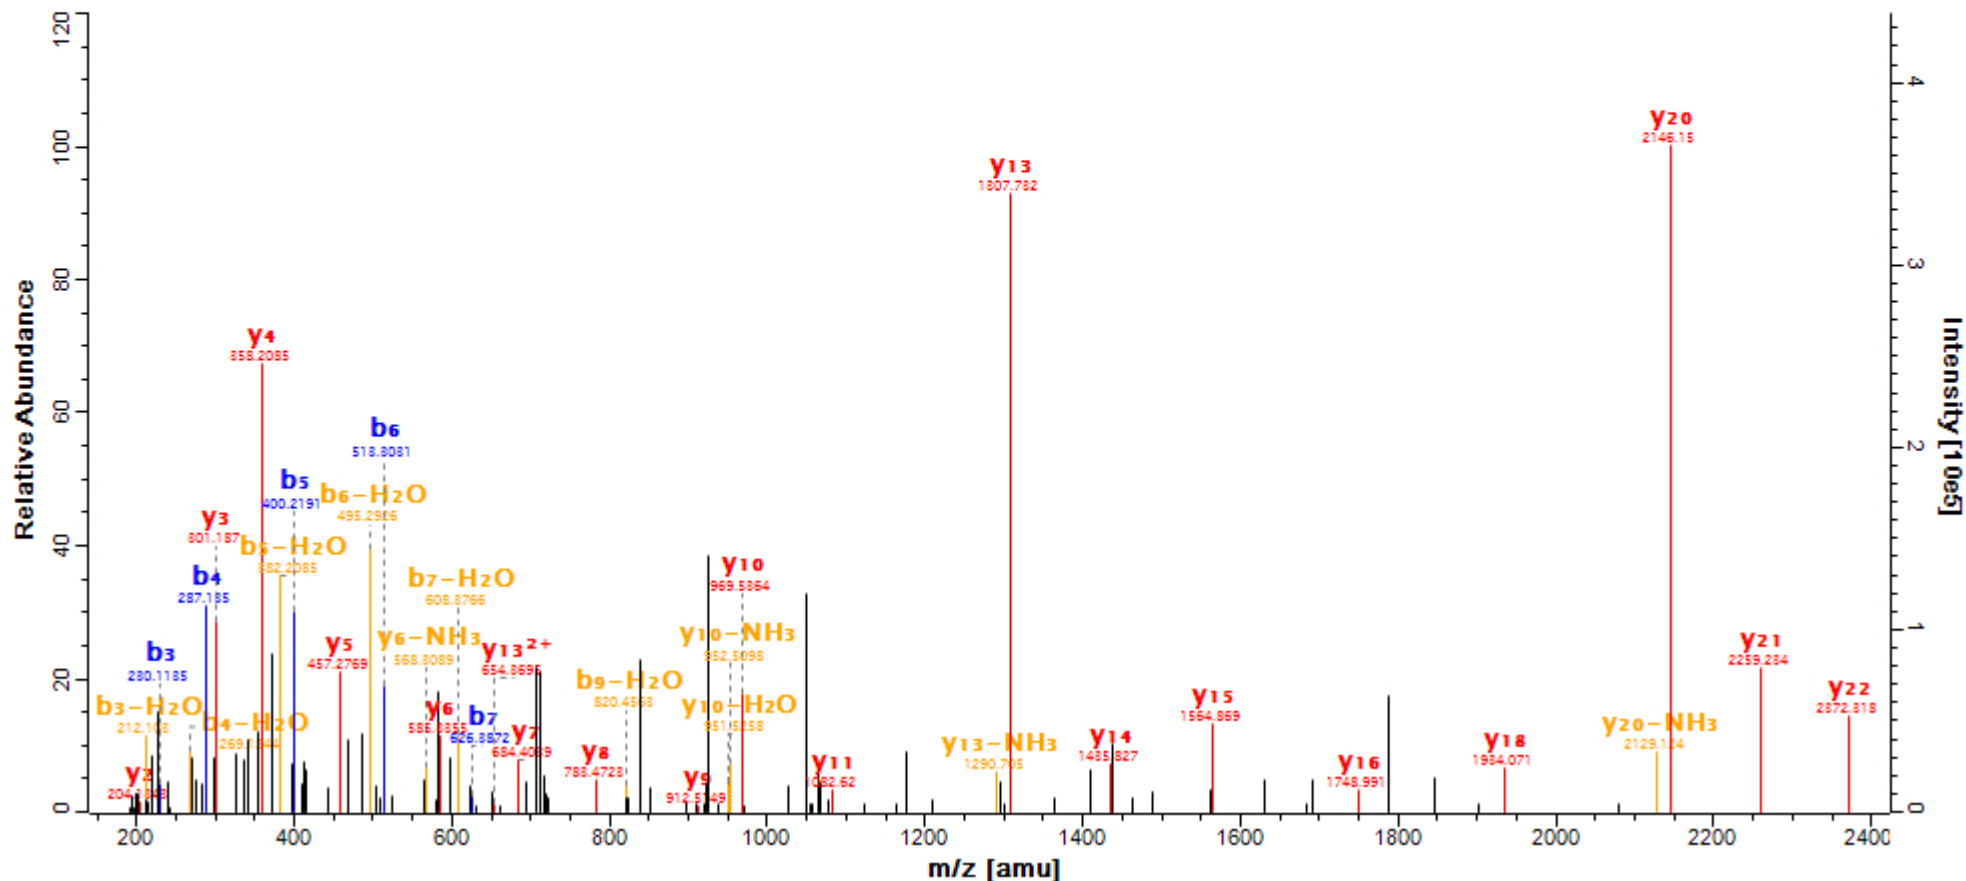

Scan number 7111  
Method FTMS; HCD

Raw file Kprop5  
Peptide 51.96

- E E E G G N L G Y K P G Y K Q G Y F P V A P T D T A Q D I R -

<sup>pr</sup>

Y14 Y13 Y12 Y11 Y10 Y9 Y6 Y2

-H<sub>2</sub>O -H<sub>2</sub>O

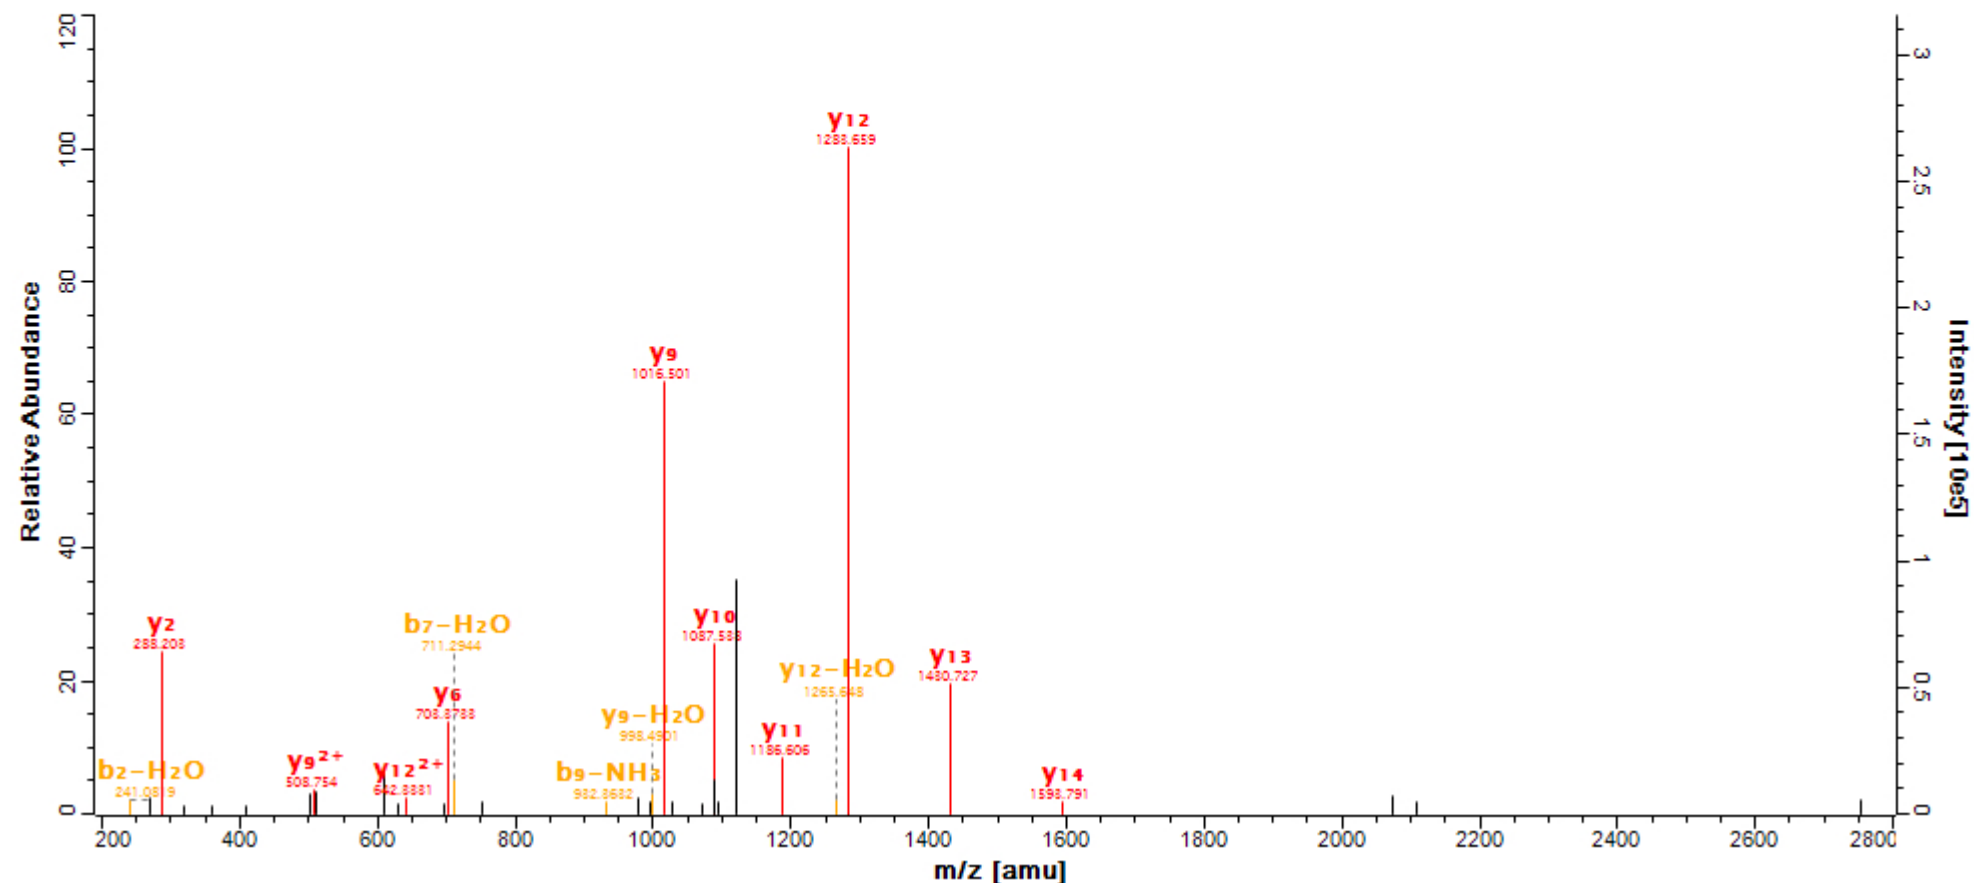

Scan number 9137 Raw file Kprop5  
Method FTMS; HCD Peptide 86.99

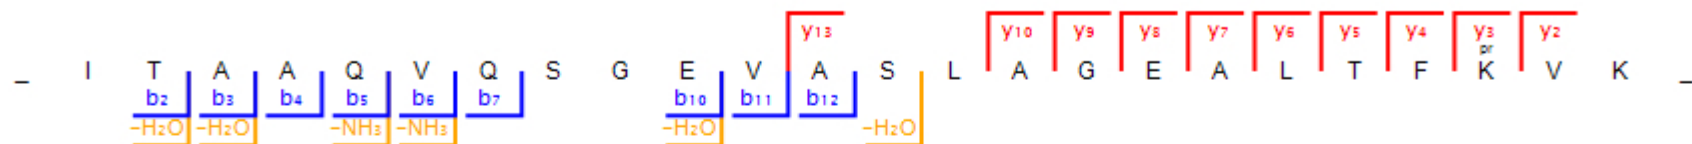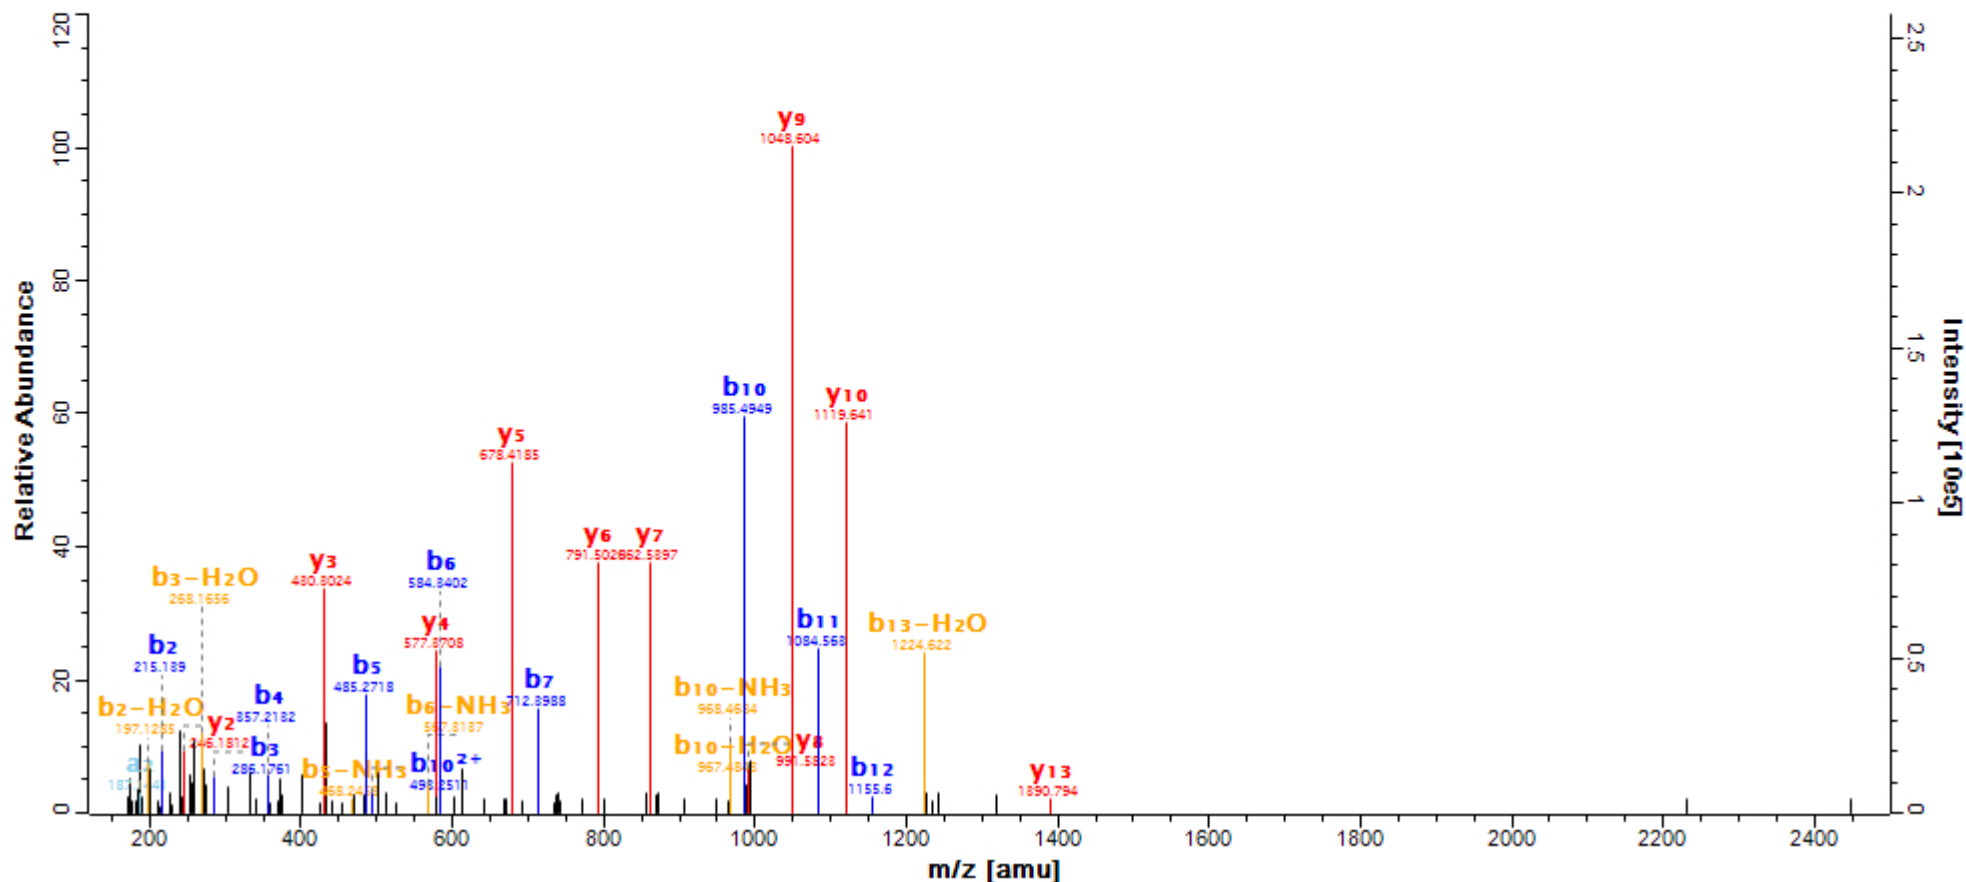

Scan number 2098 Raw file Kprop6  
Method FTMS; HCD Peptide 39.62

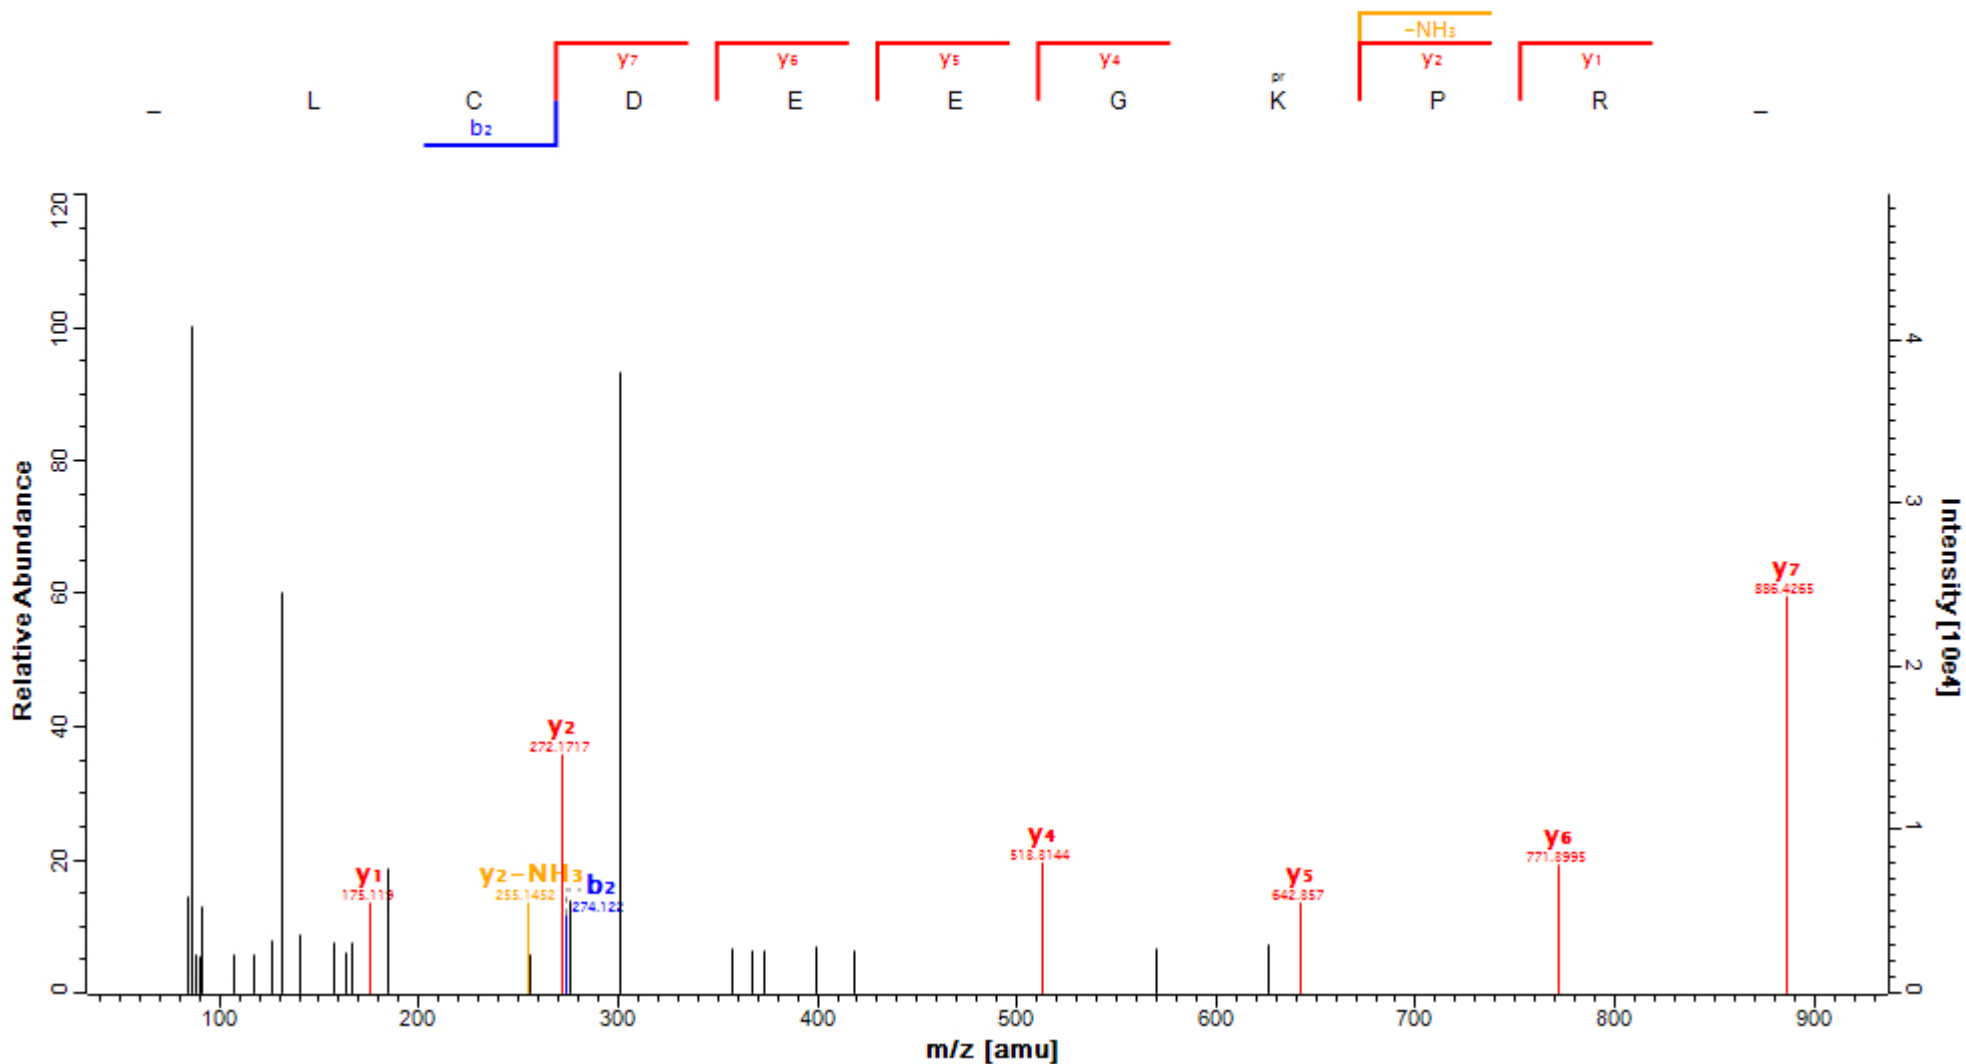

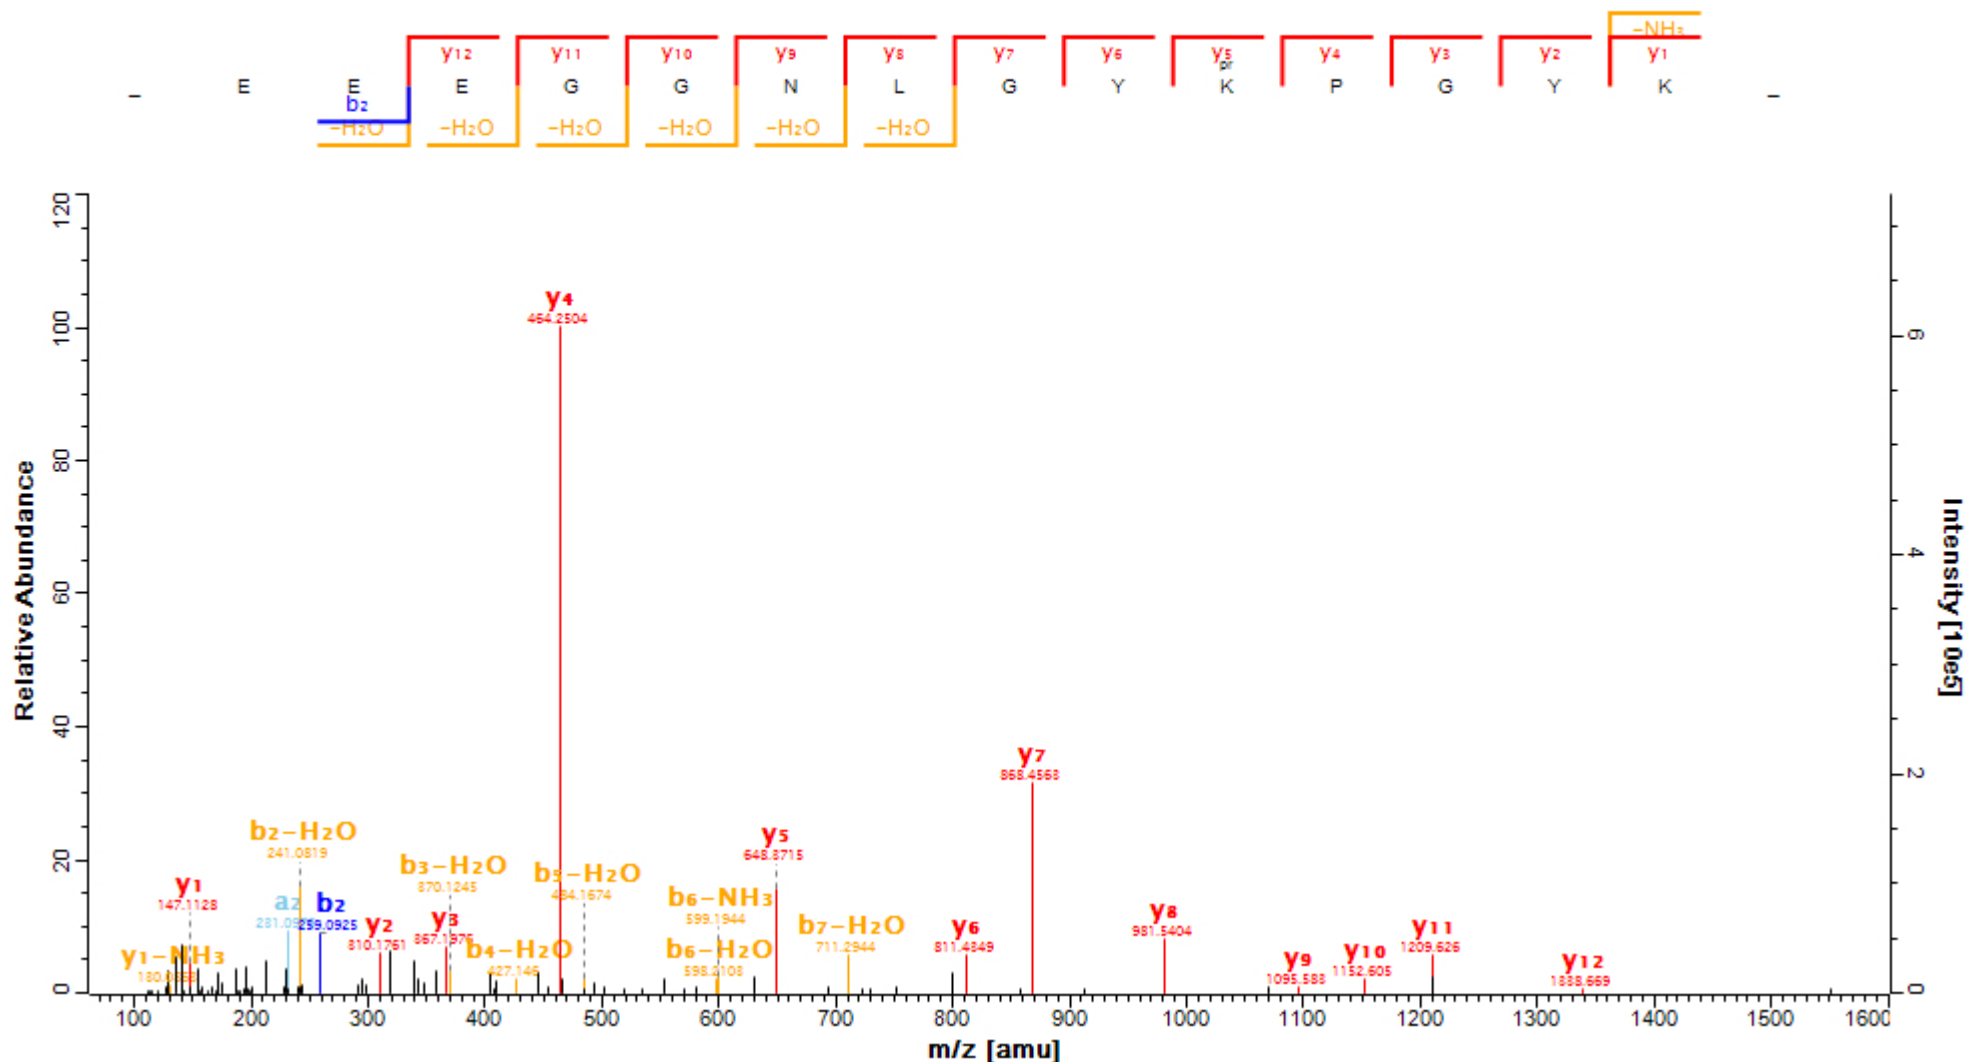



Scan number 5384  
Method FTMS; HCD

Raw file Kprop6  
Peptide 83.31

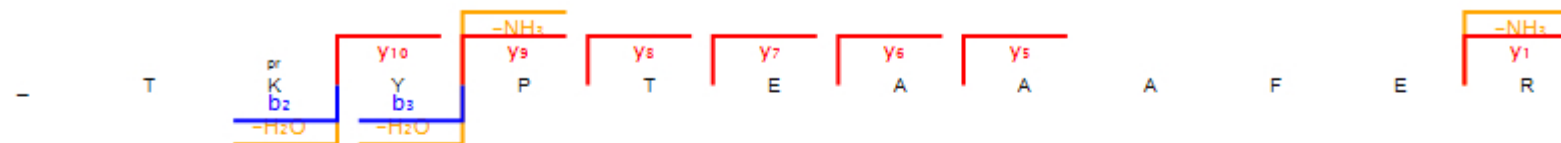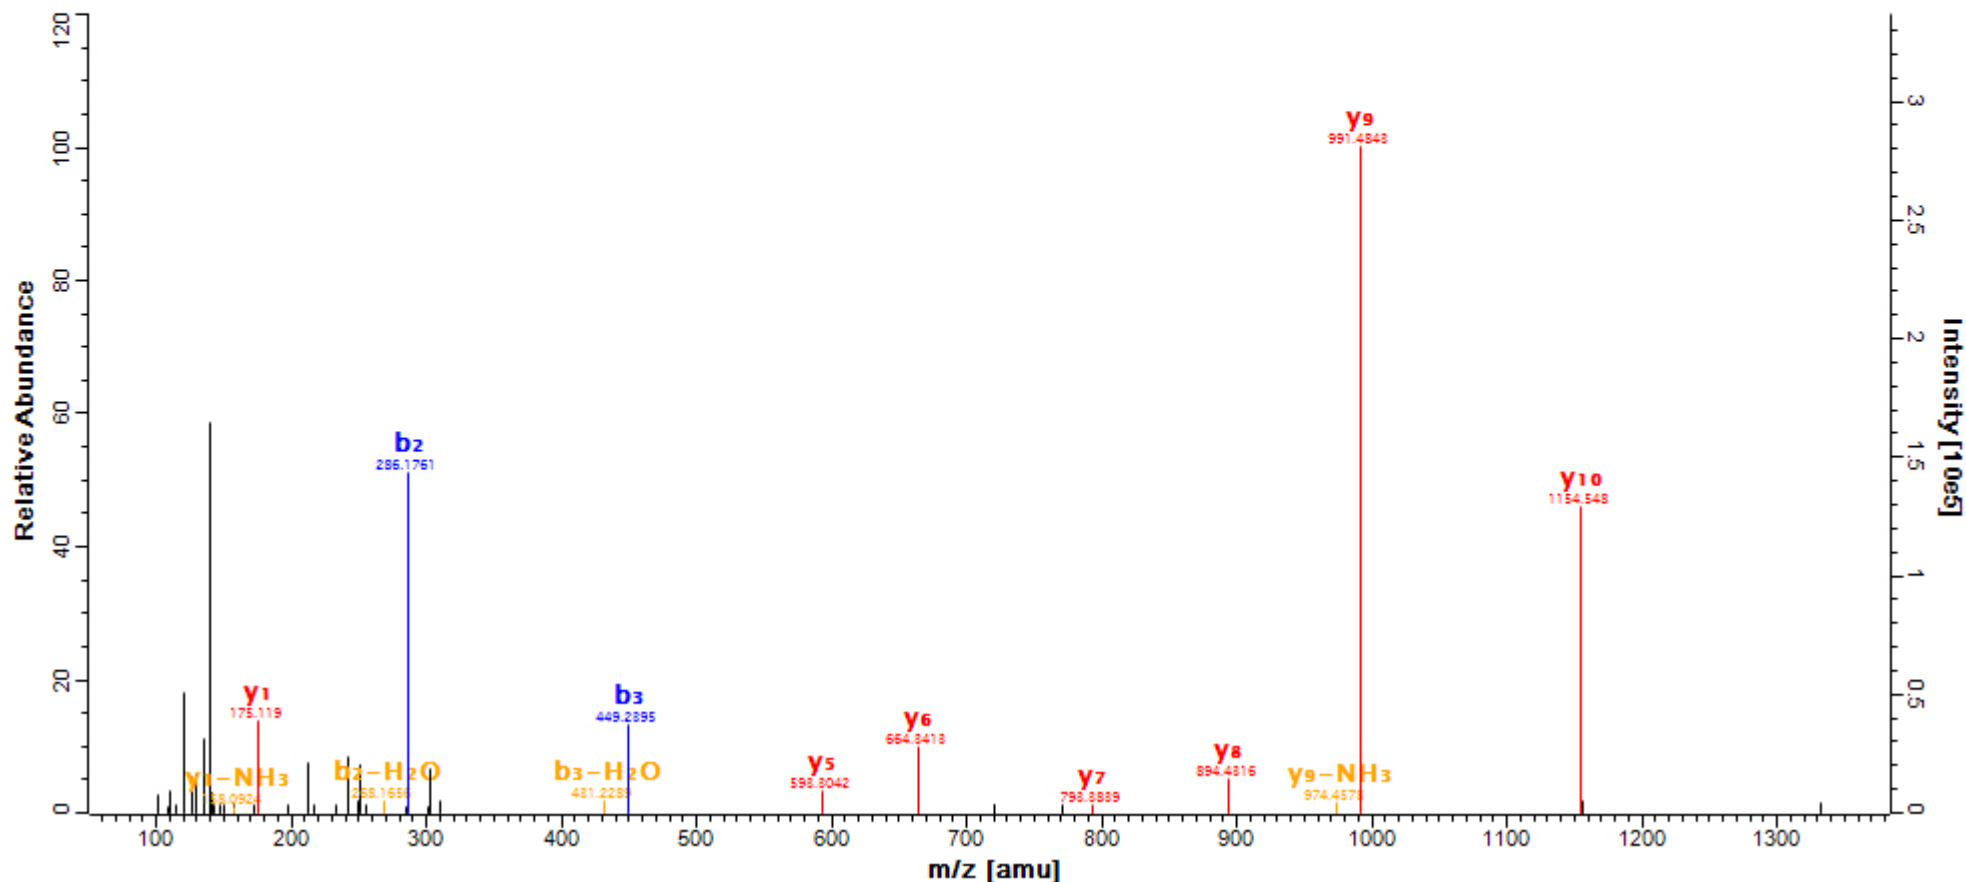

Scan number 5519 Raw file Kprop6  
 Method FTMS; HCD Peptide 118.37

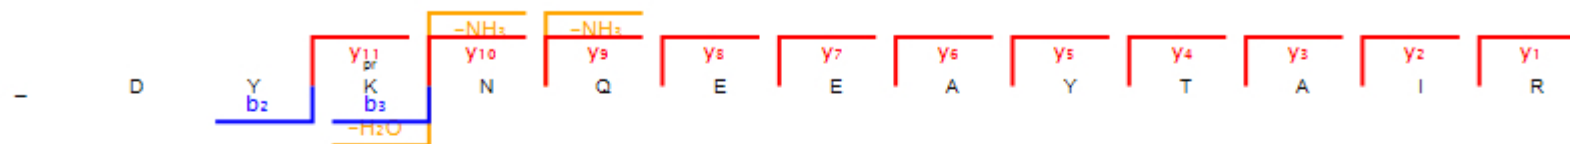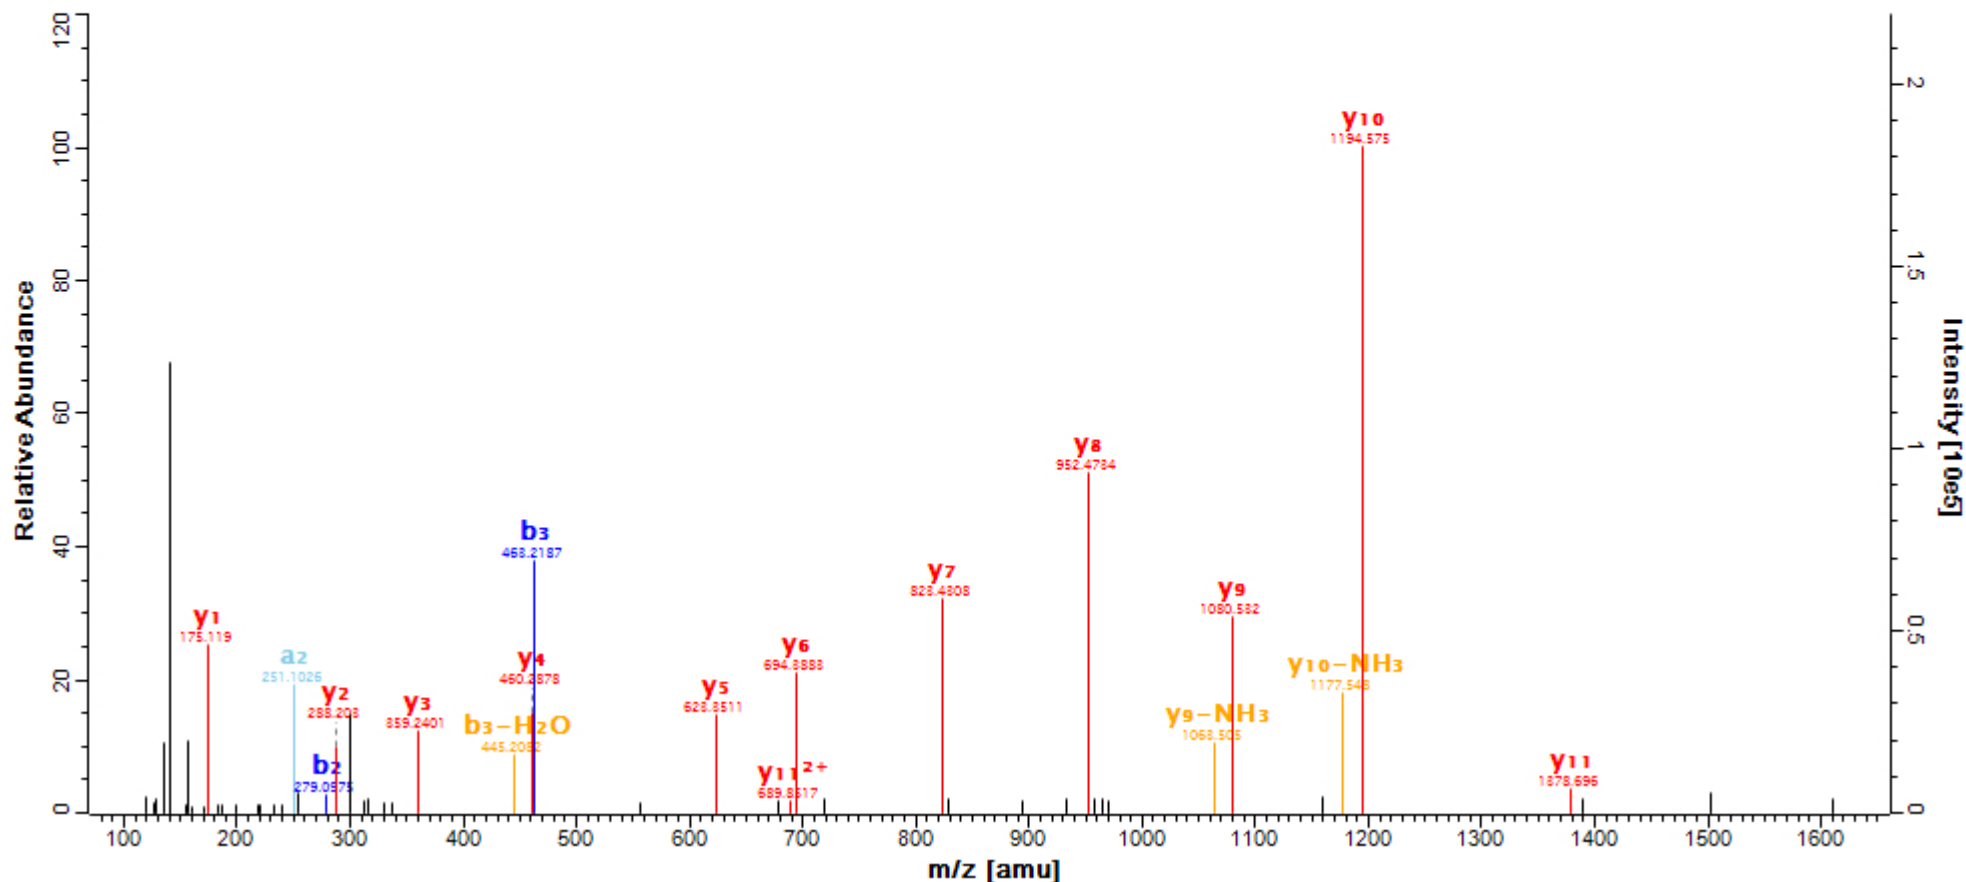

|             |           |          |        |
|-------------|-----------|----------|--------|
| Scan number | 5520      | Raw file | Kprop6 |
| Method      | FTMS; HCD | Pepti... | 74.46  |

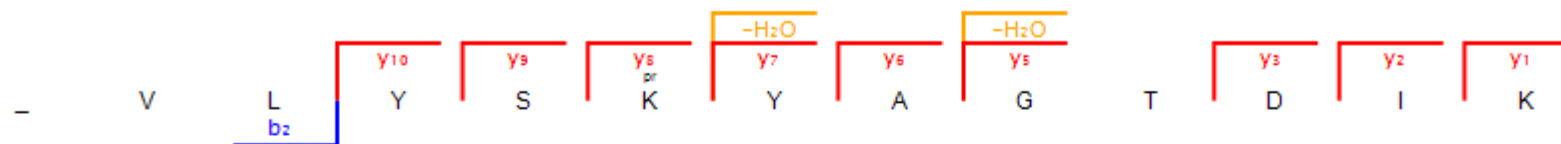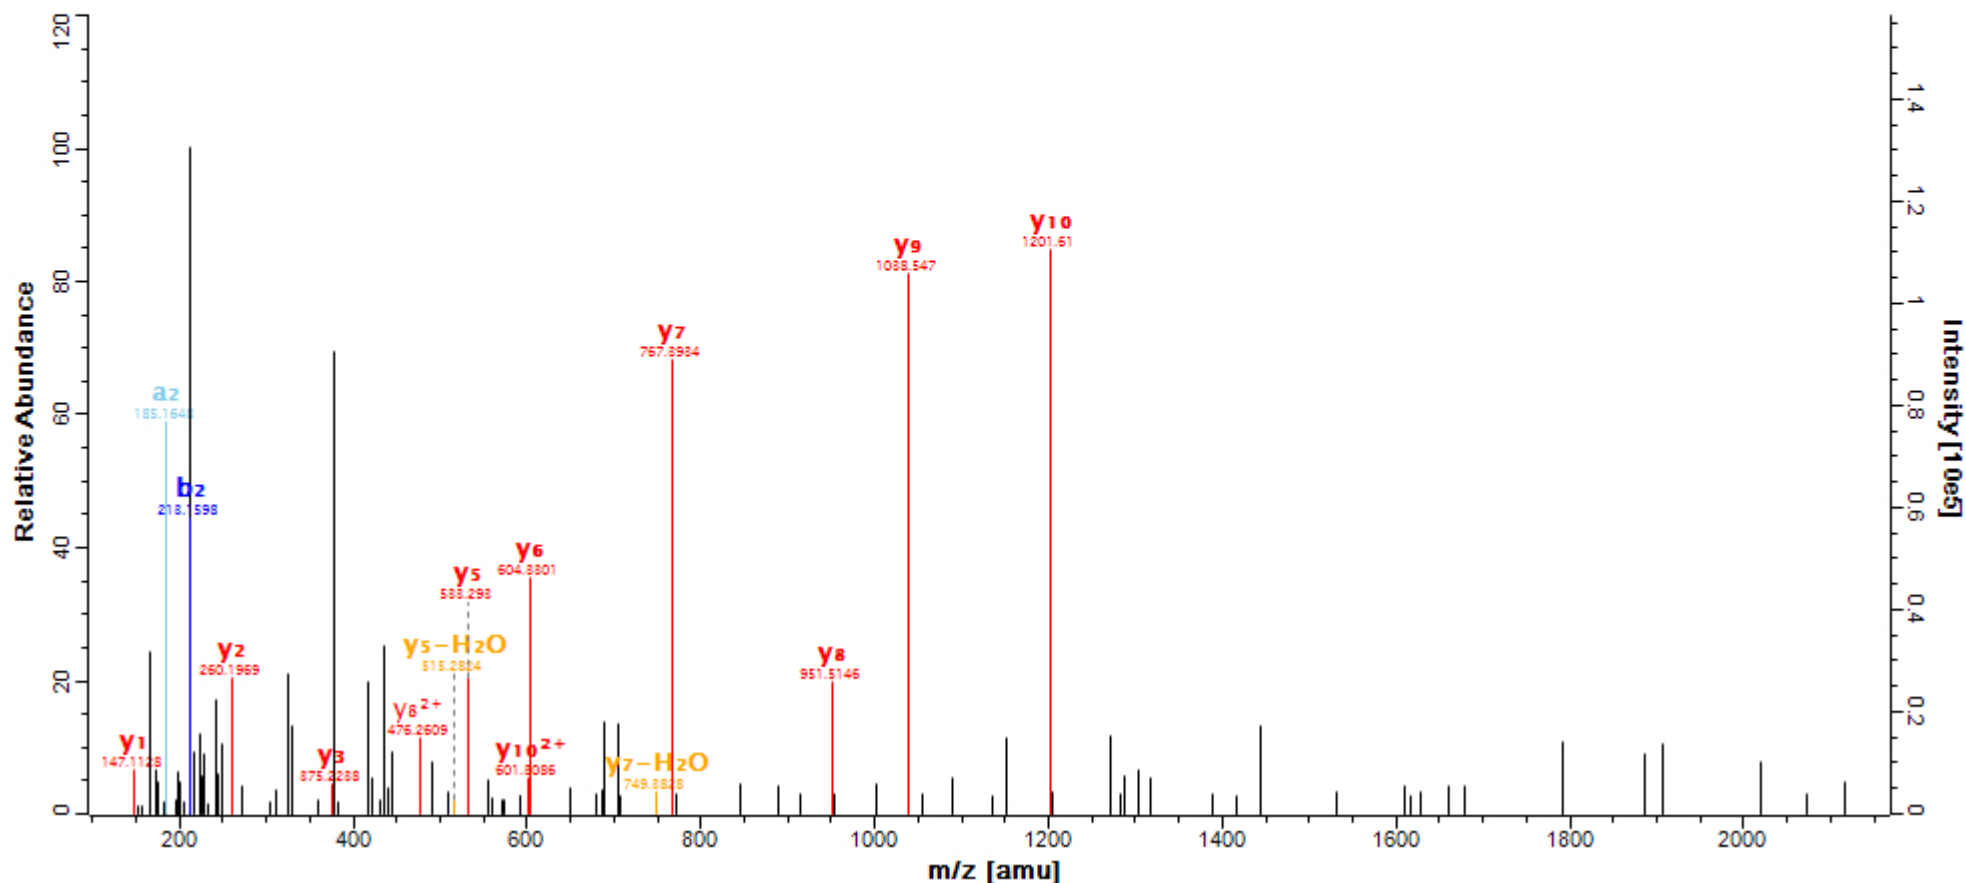

Scan number 5743  
Method FTMS; HCD

Raw file Kprop6  
Peptide 76.77

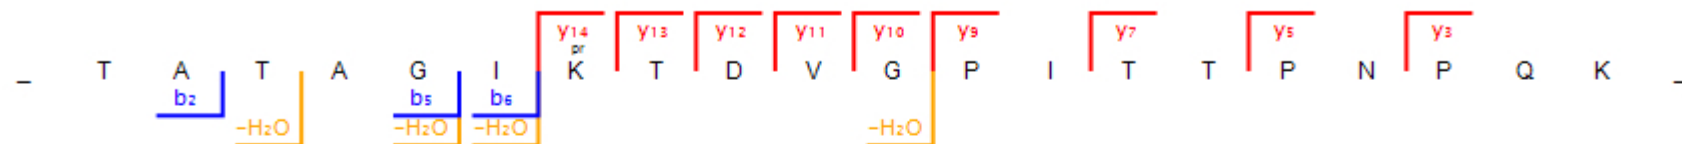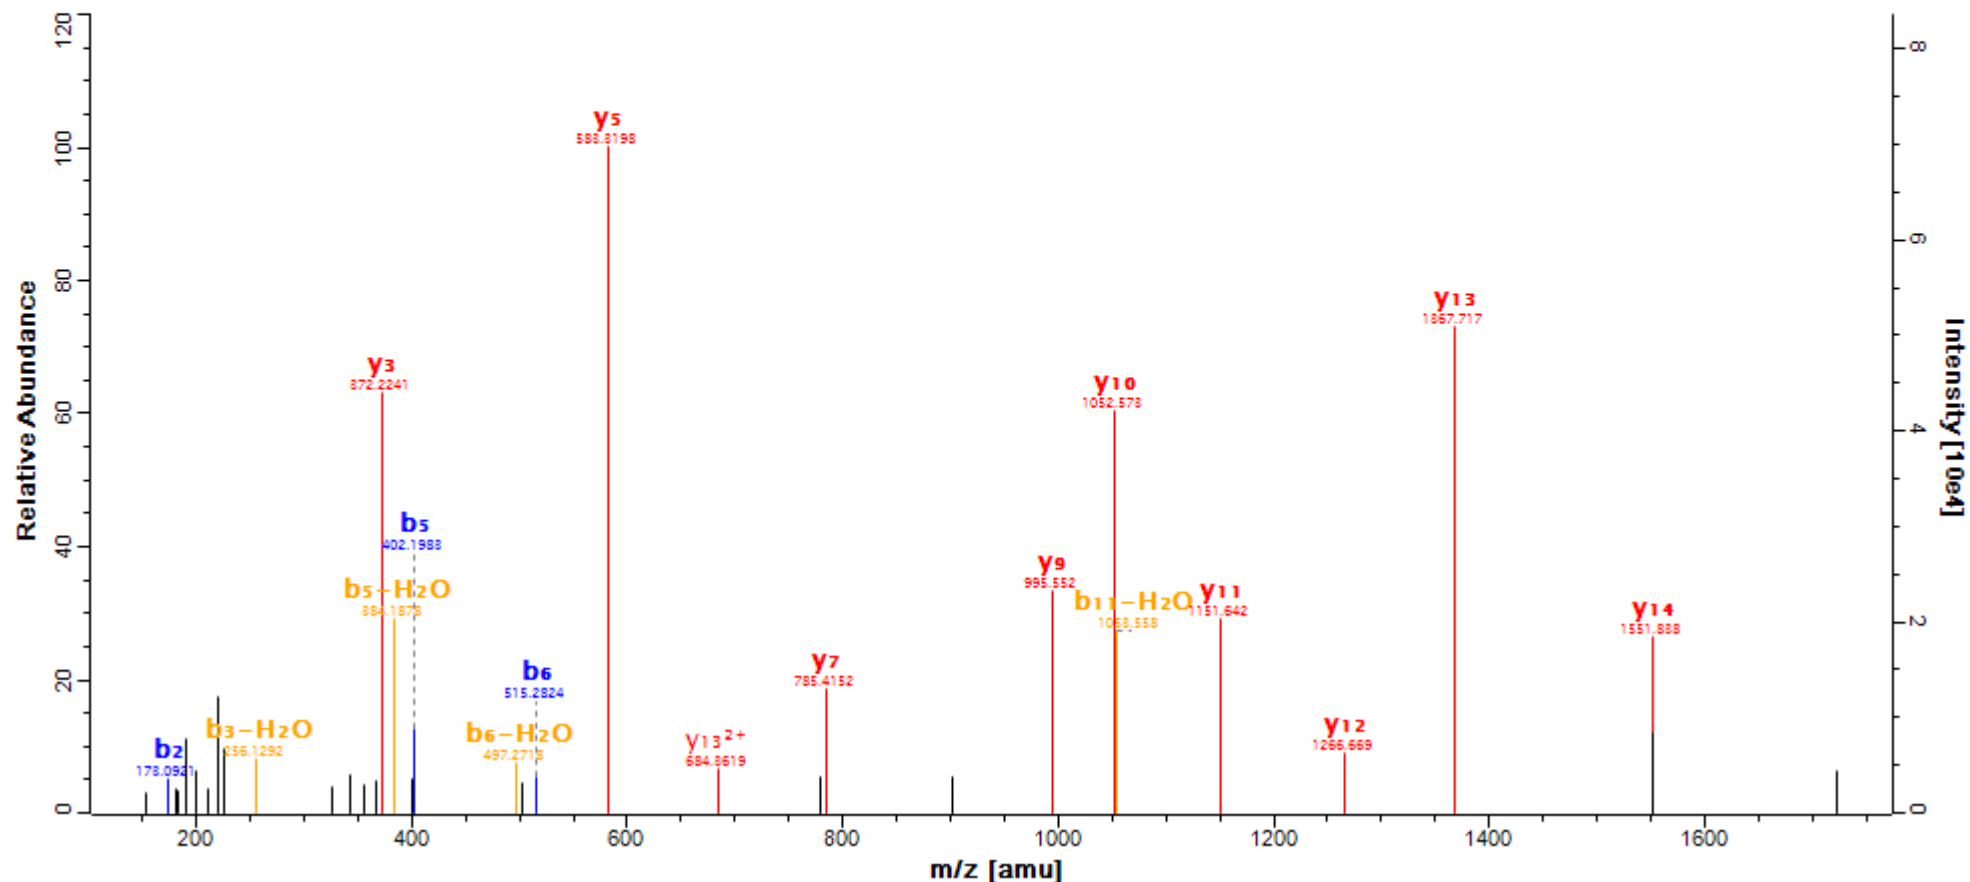

|             |           |          |        |
|-------------|-----------|----------|--------|
| Scan number | 5827      | Raw file | Kprop6 |
| Method      | FTMS; HCD | Pepti... | 110.66 |

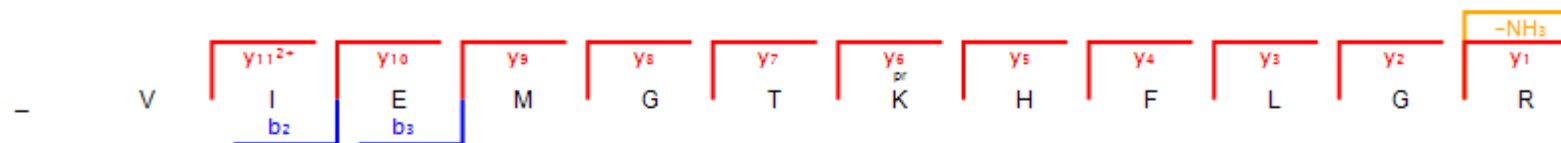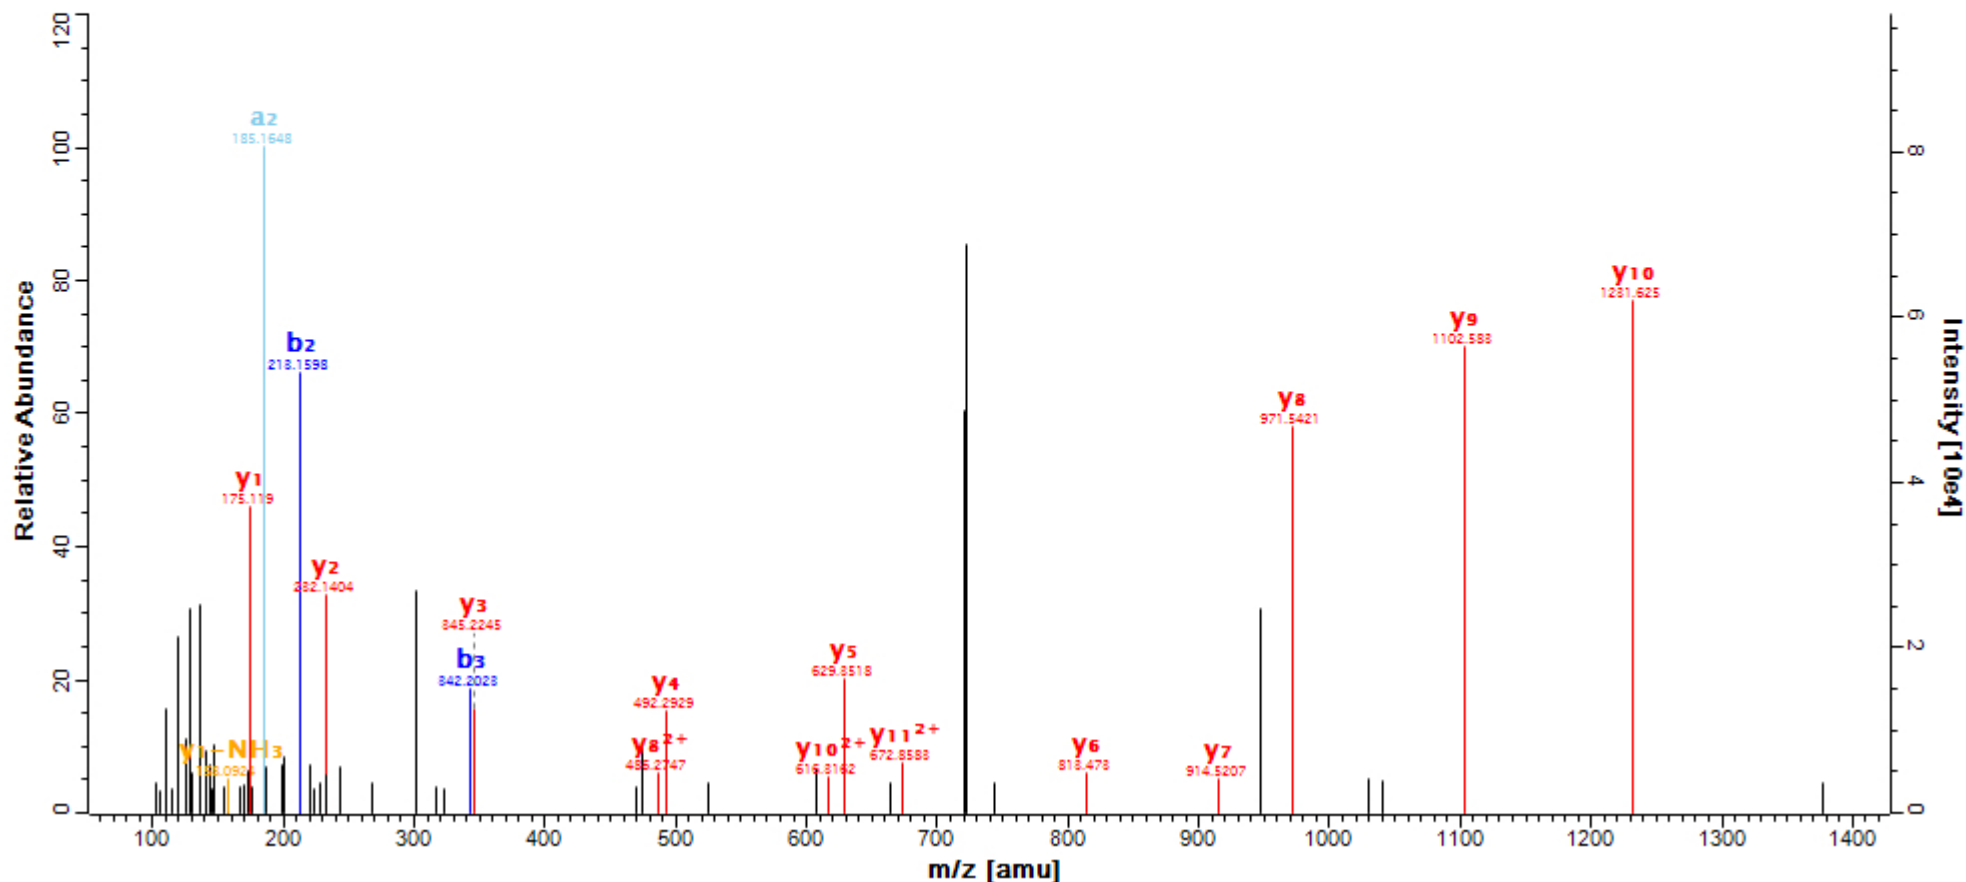

Scan number 6109 Raw file Kprop6  
 Method FTMS; HCD Peptide 115.8

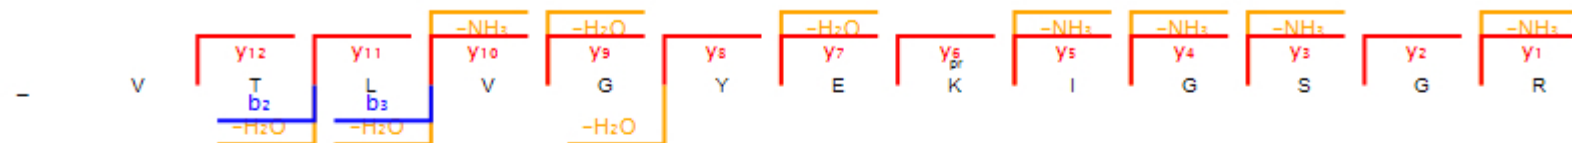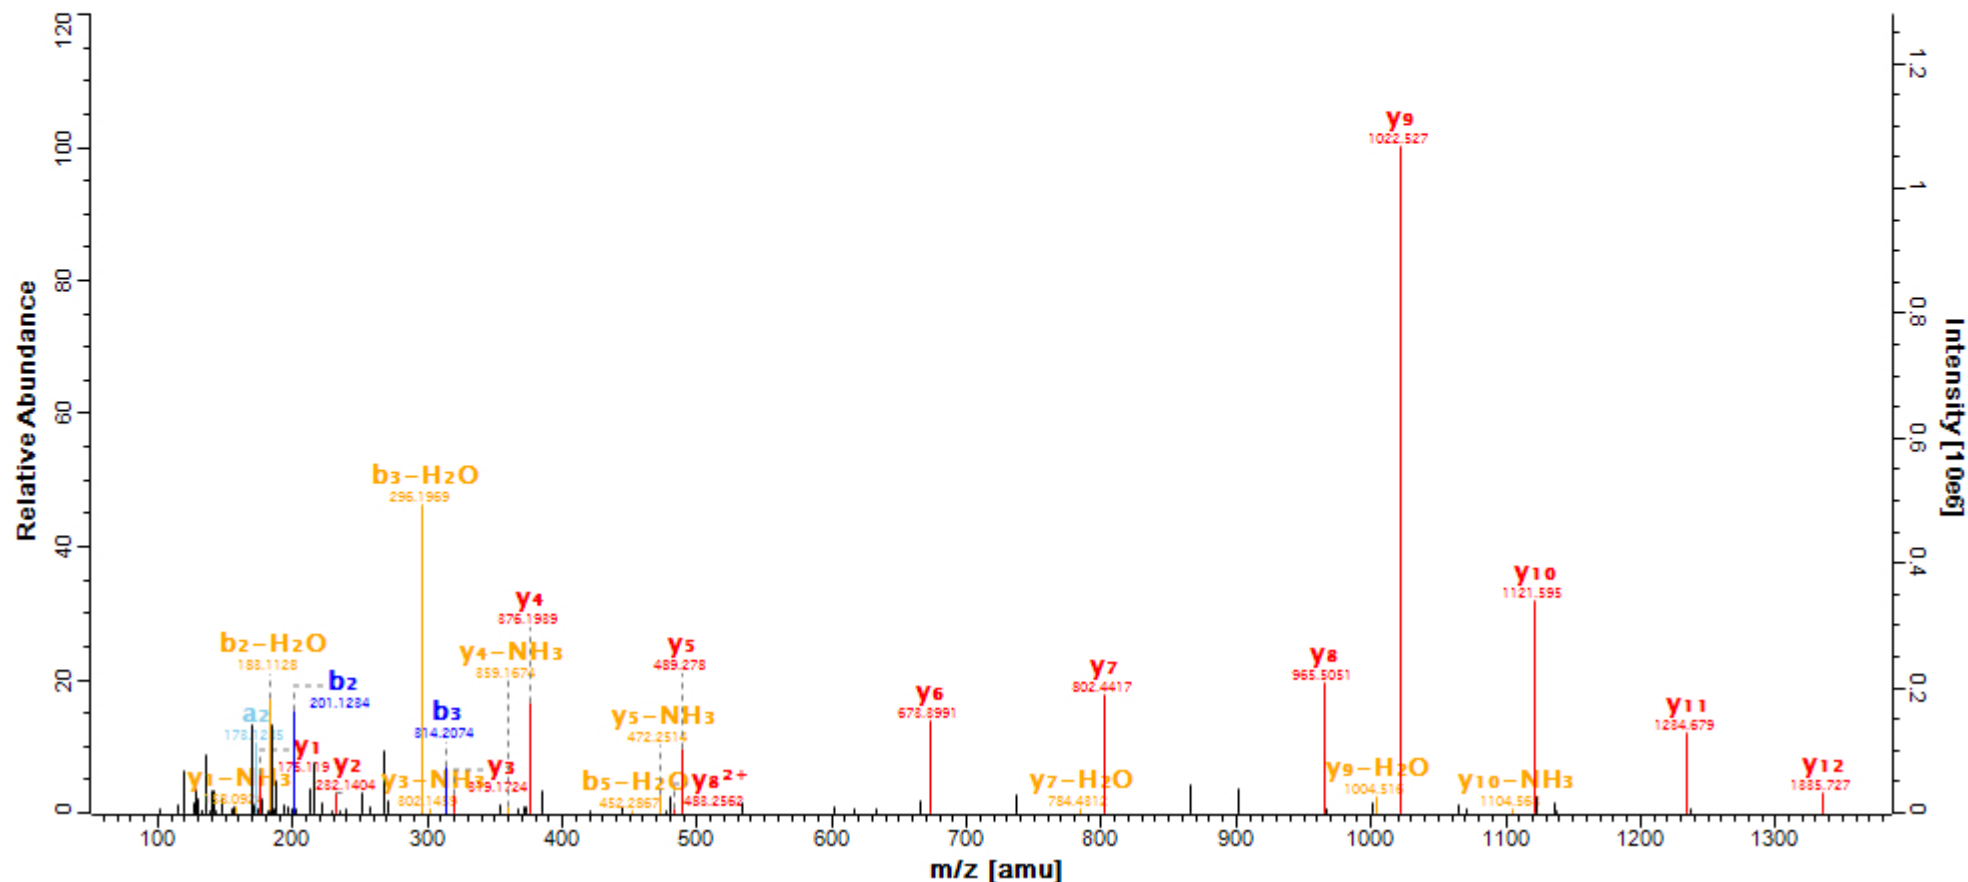

Scan number 6531  
Method FTMS; HCD

Raw file Kprop6  
Peptide 121.83

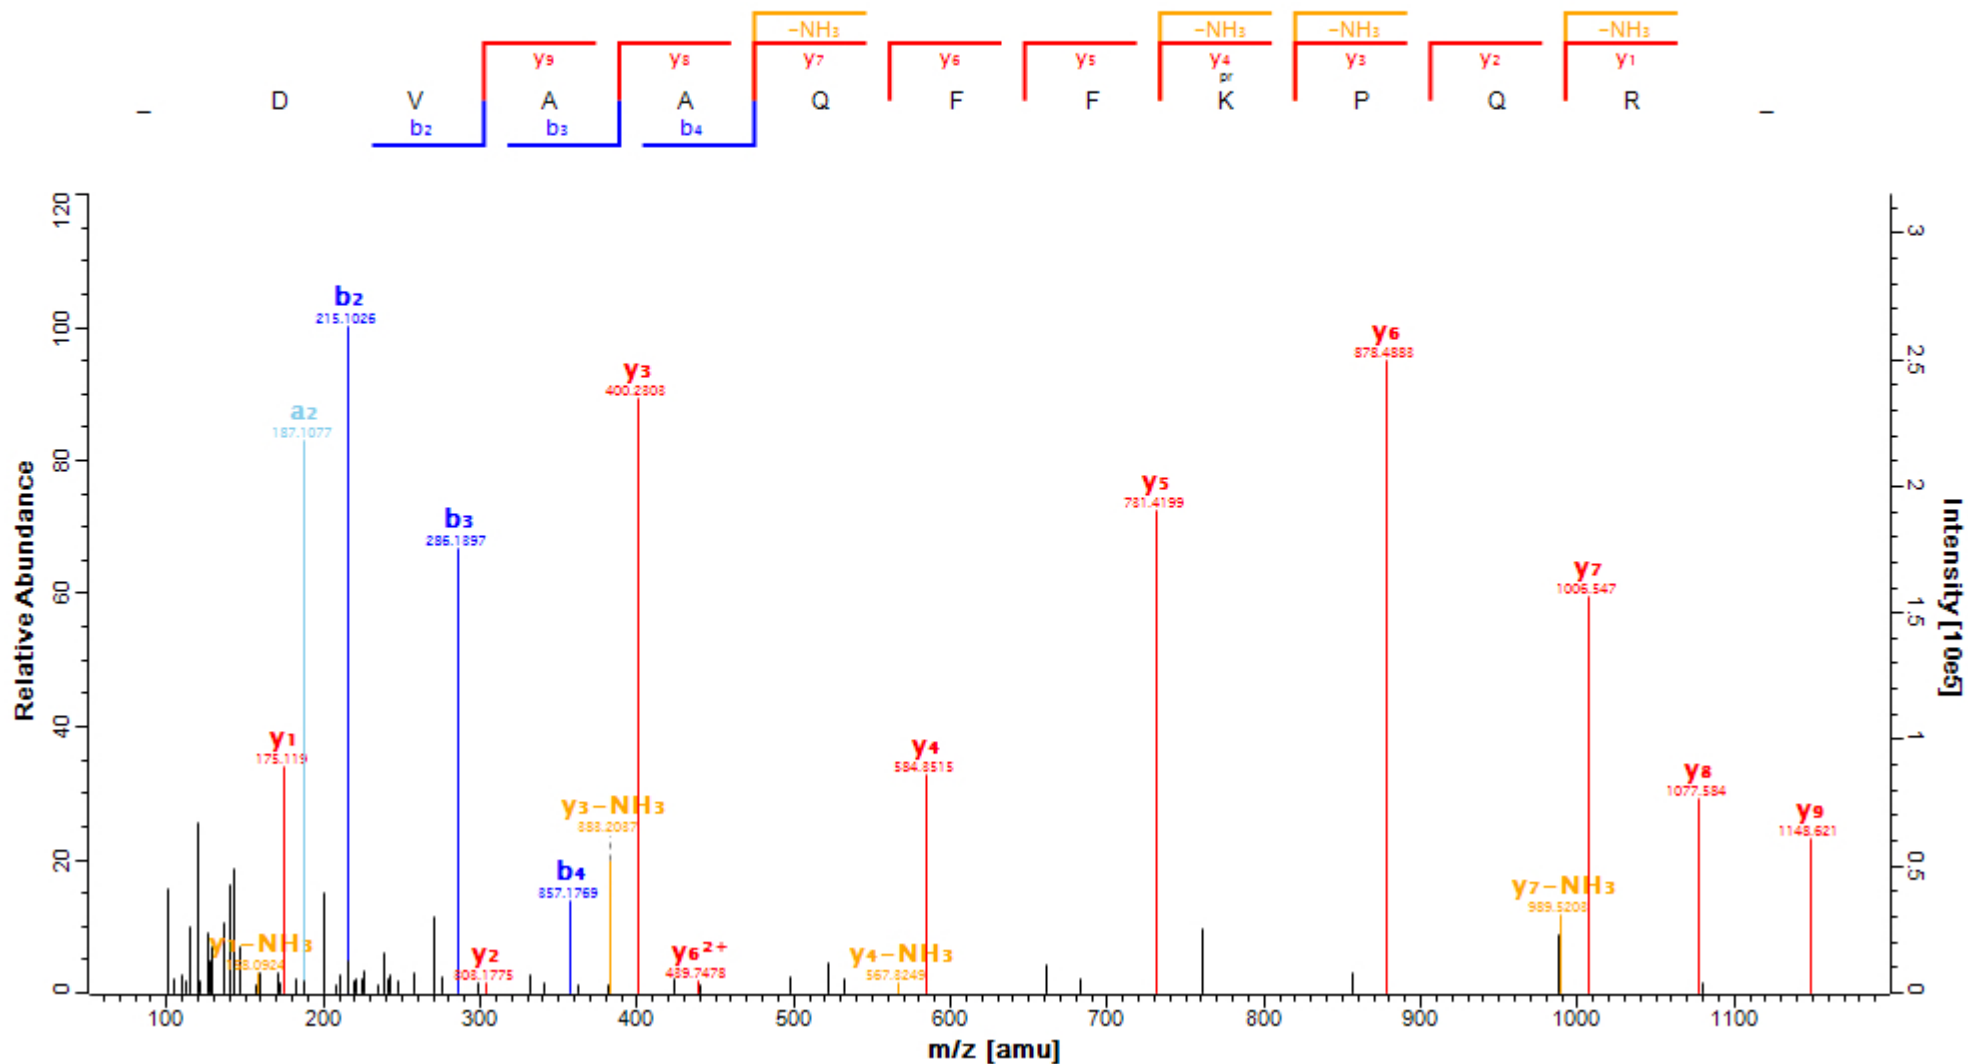

Scan number 7892 Raw file Kprop6  
 Method FTMS; HCD Peptide 100.72

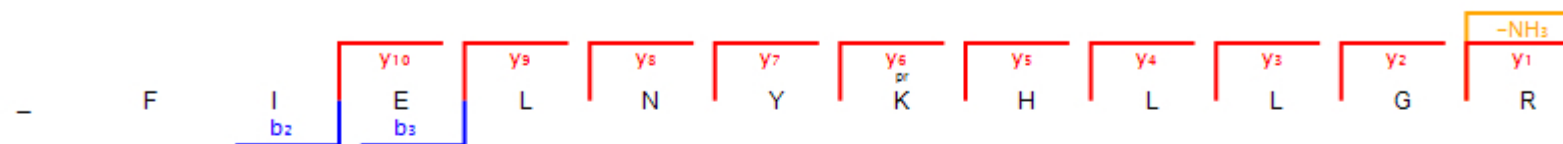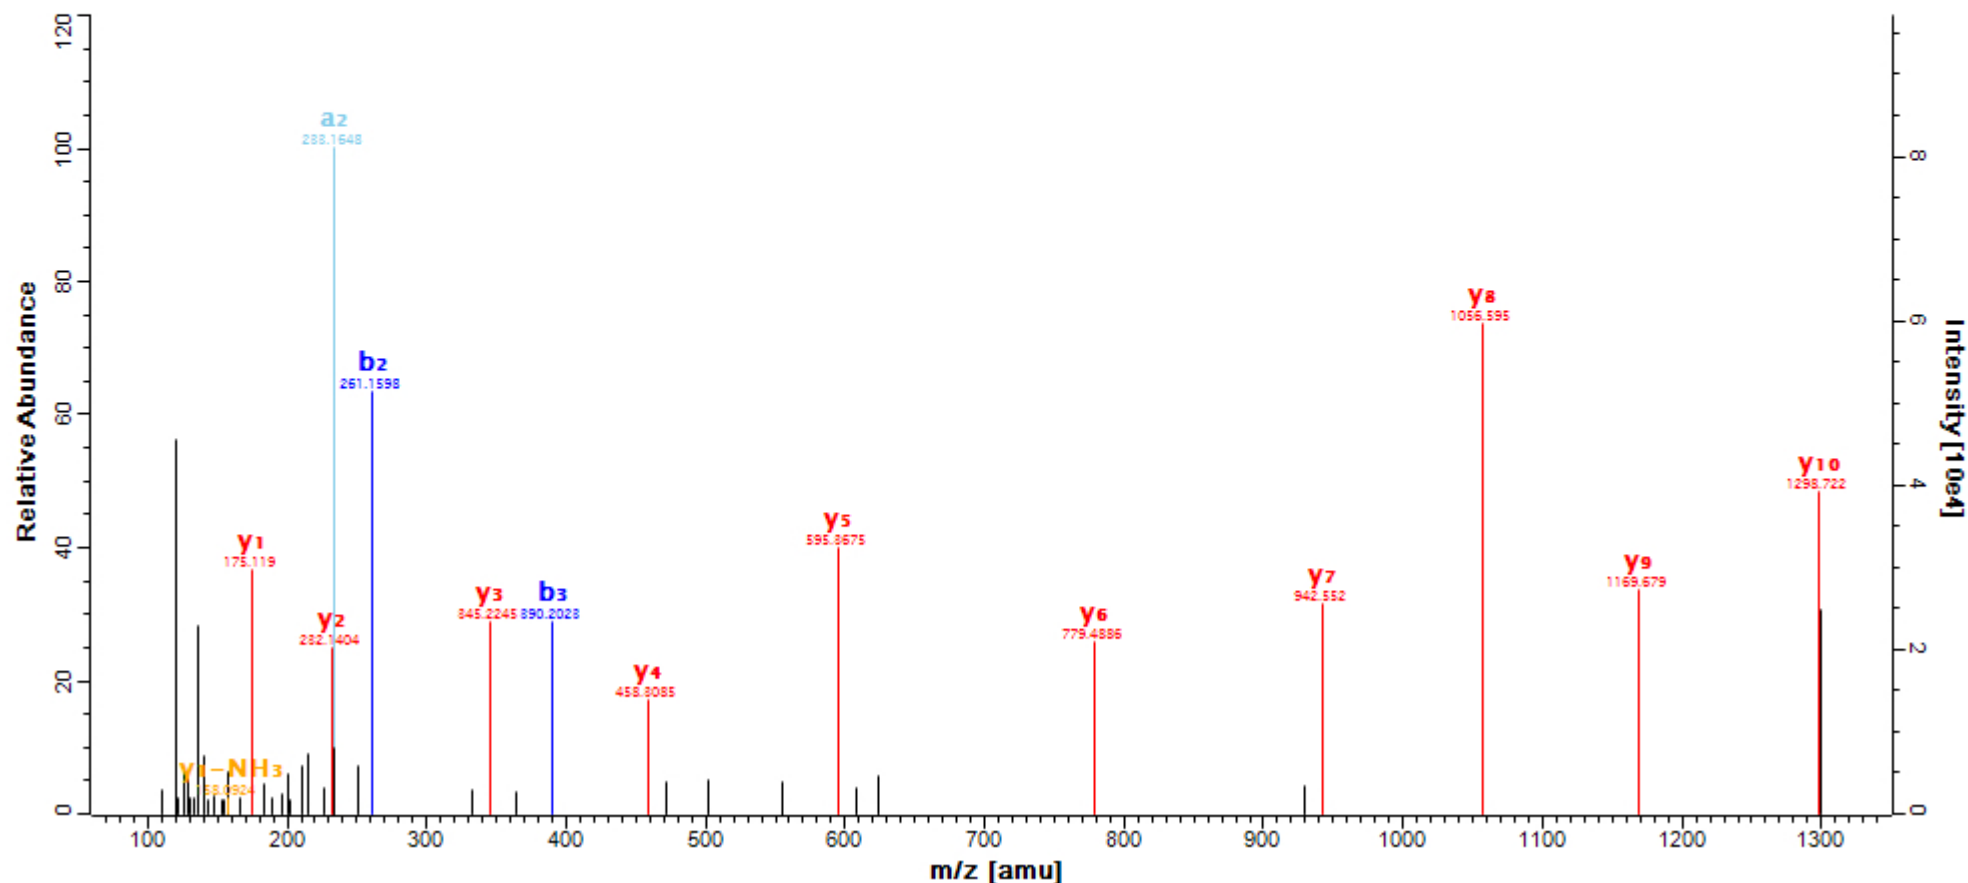



Scan number 7989 Raw file Kprop6  
 Method FTMS; HCD Peptide 88.19

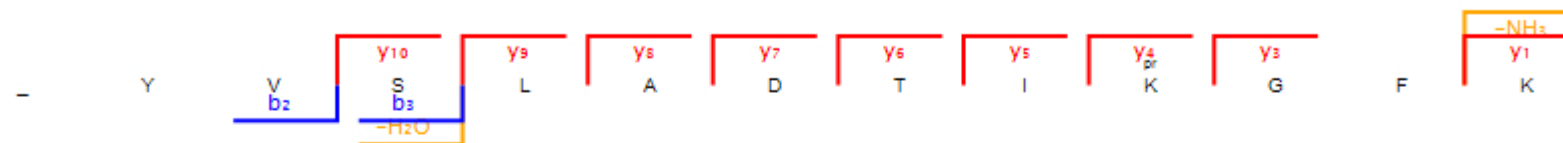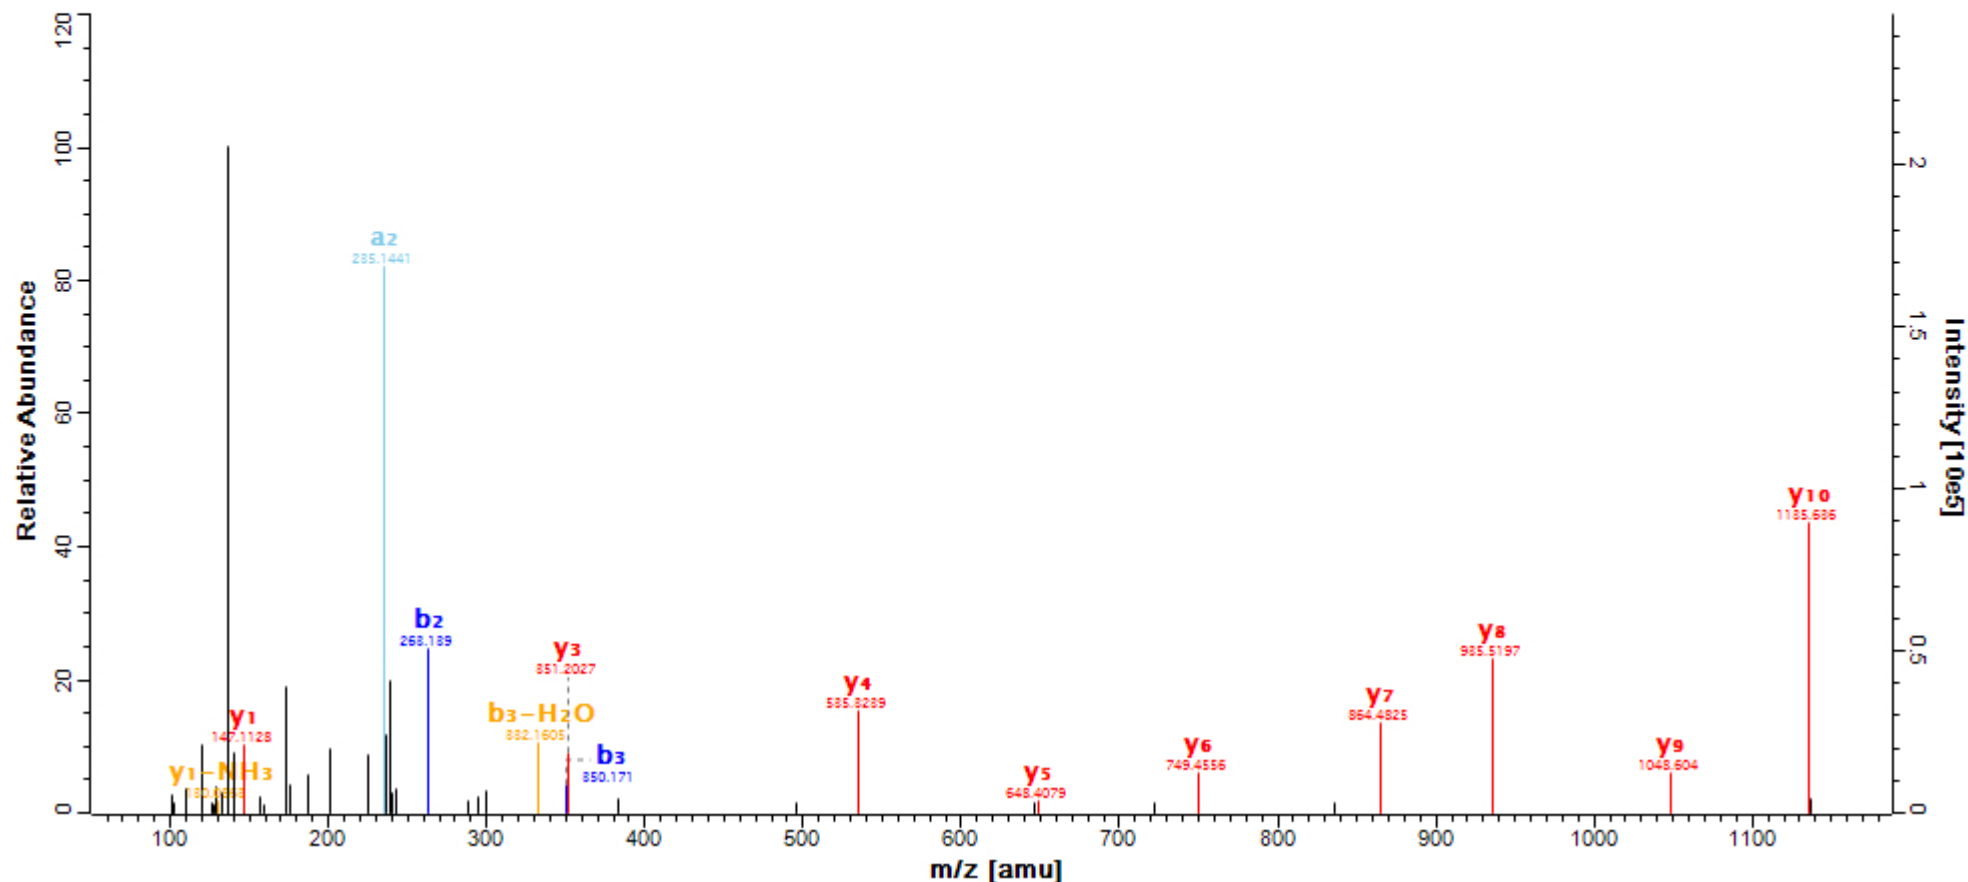

Scan number 3805  
Method FTMS; HCD

Raw file Kprop7  
Peptide 108.56

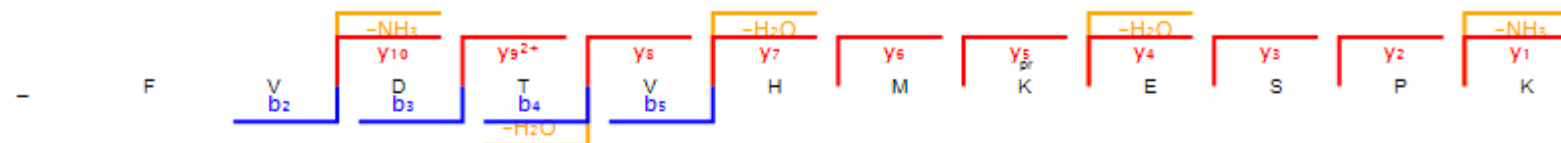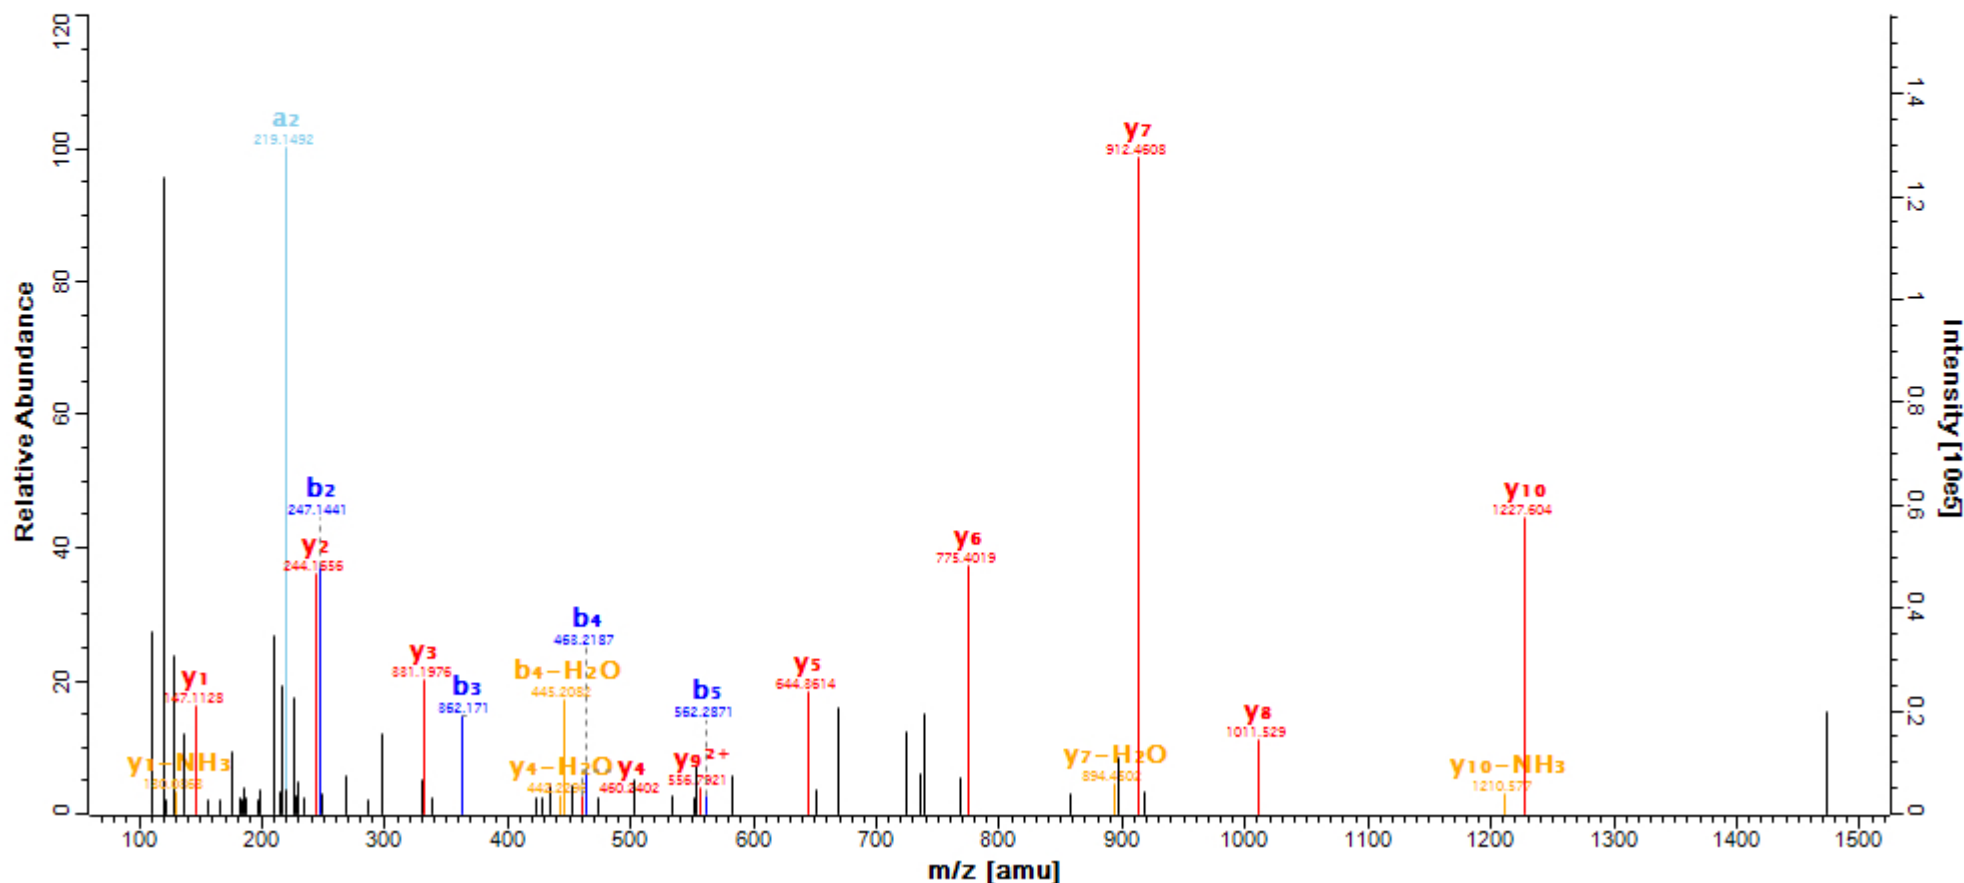

Scan number 4152  
Method FTMS; HCD

Raw file Kprop7  
Peptide 72.64

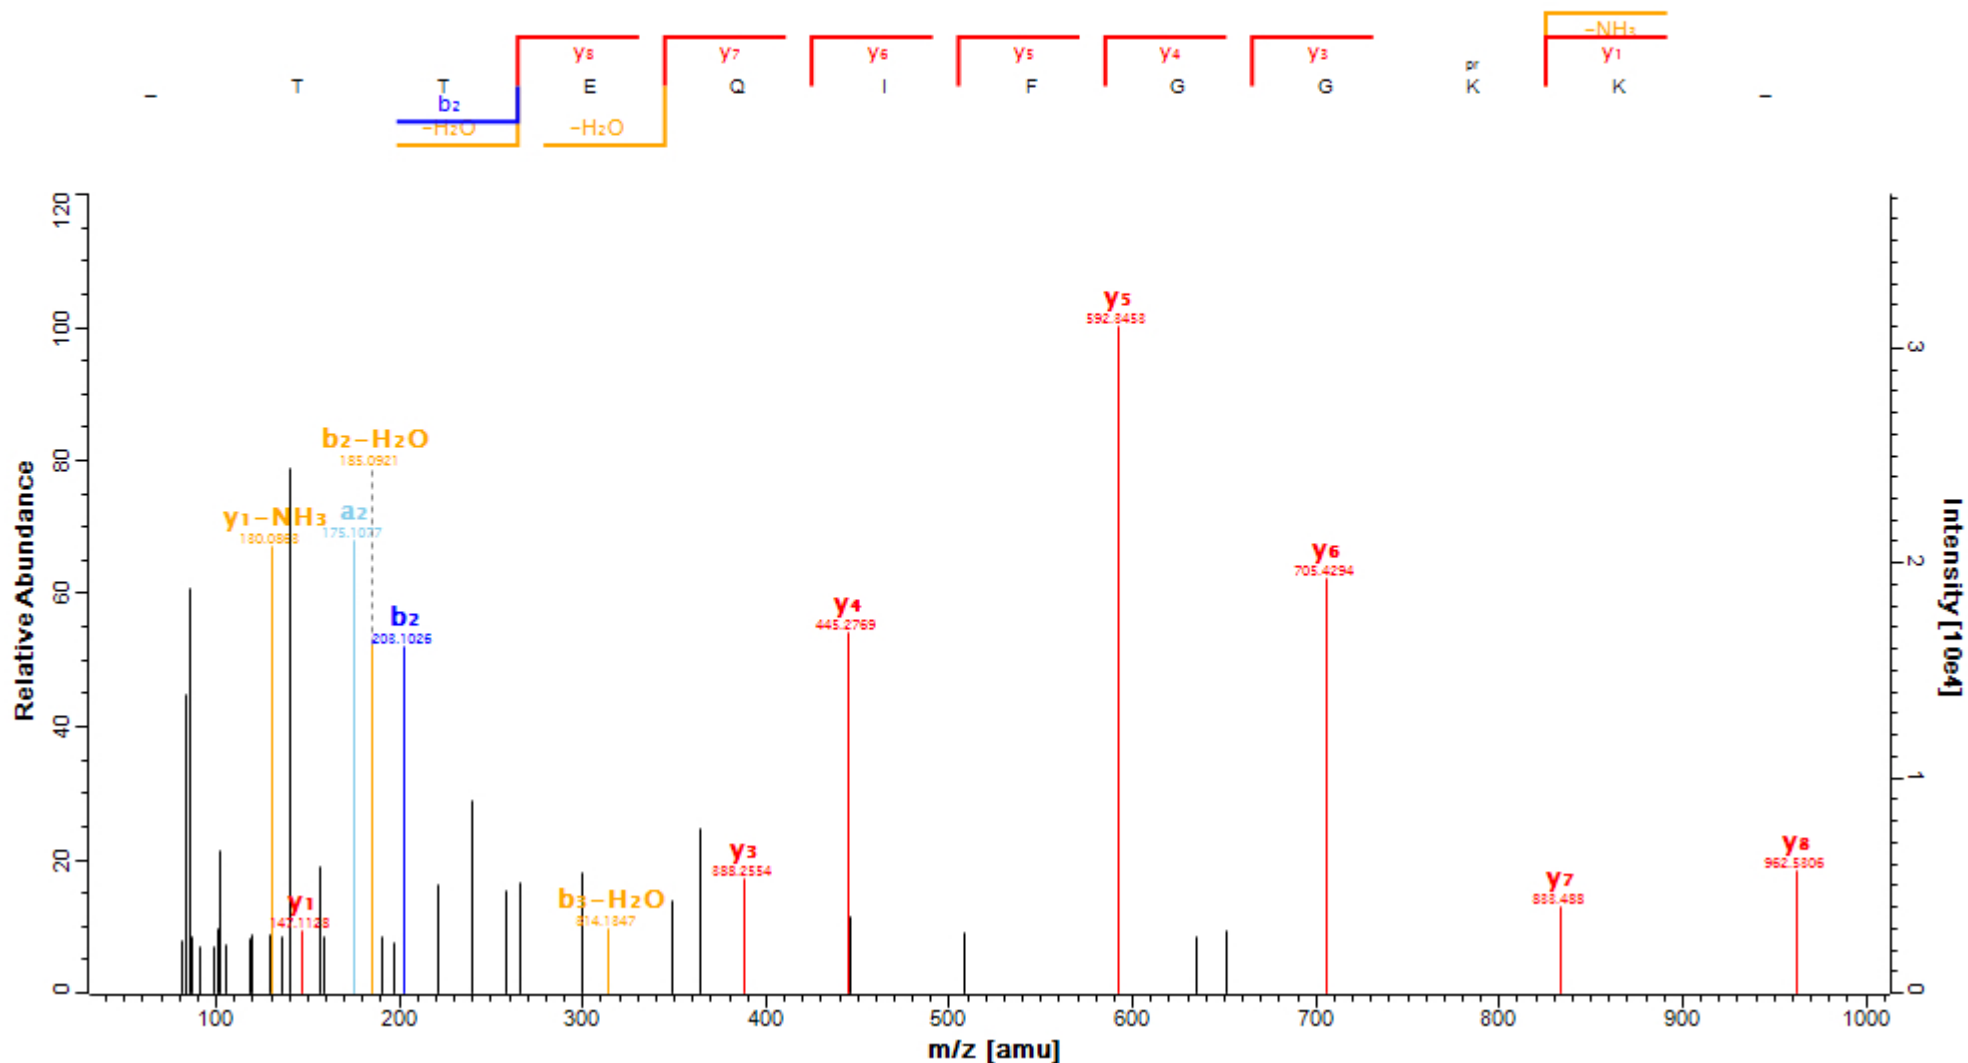

Scan number 4199  
Method FTMS; HCD

Raw file Kprop7  
Peptide 90.37

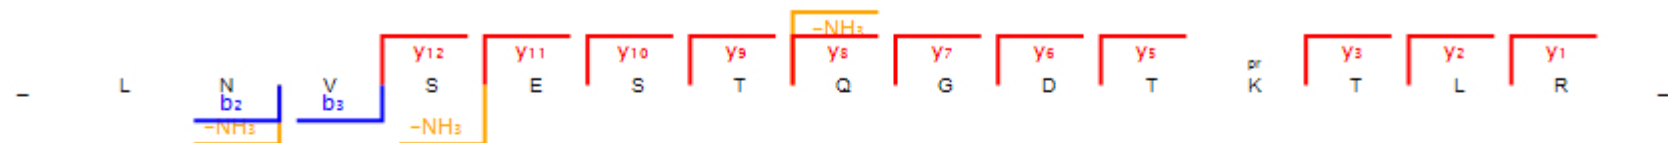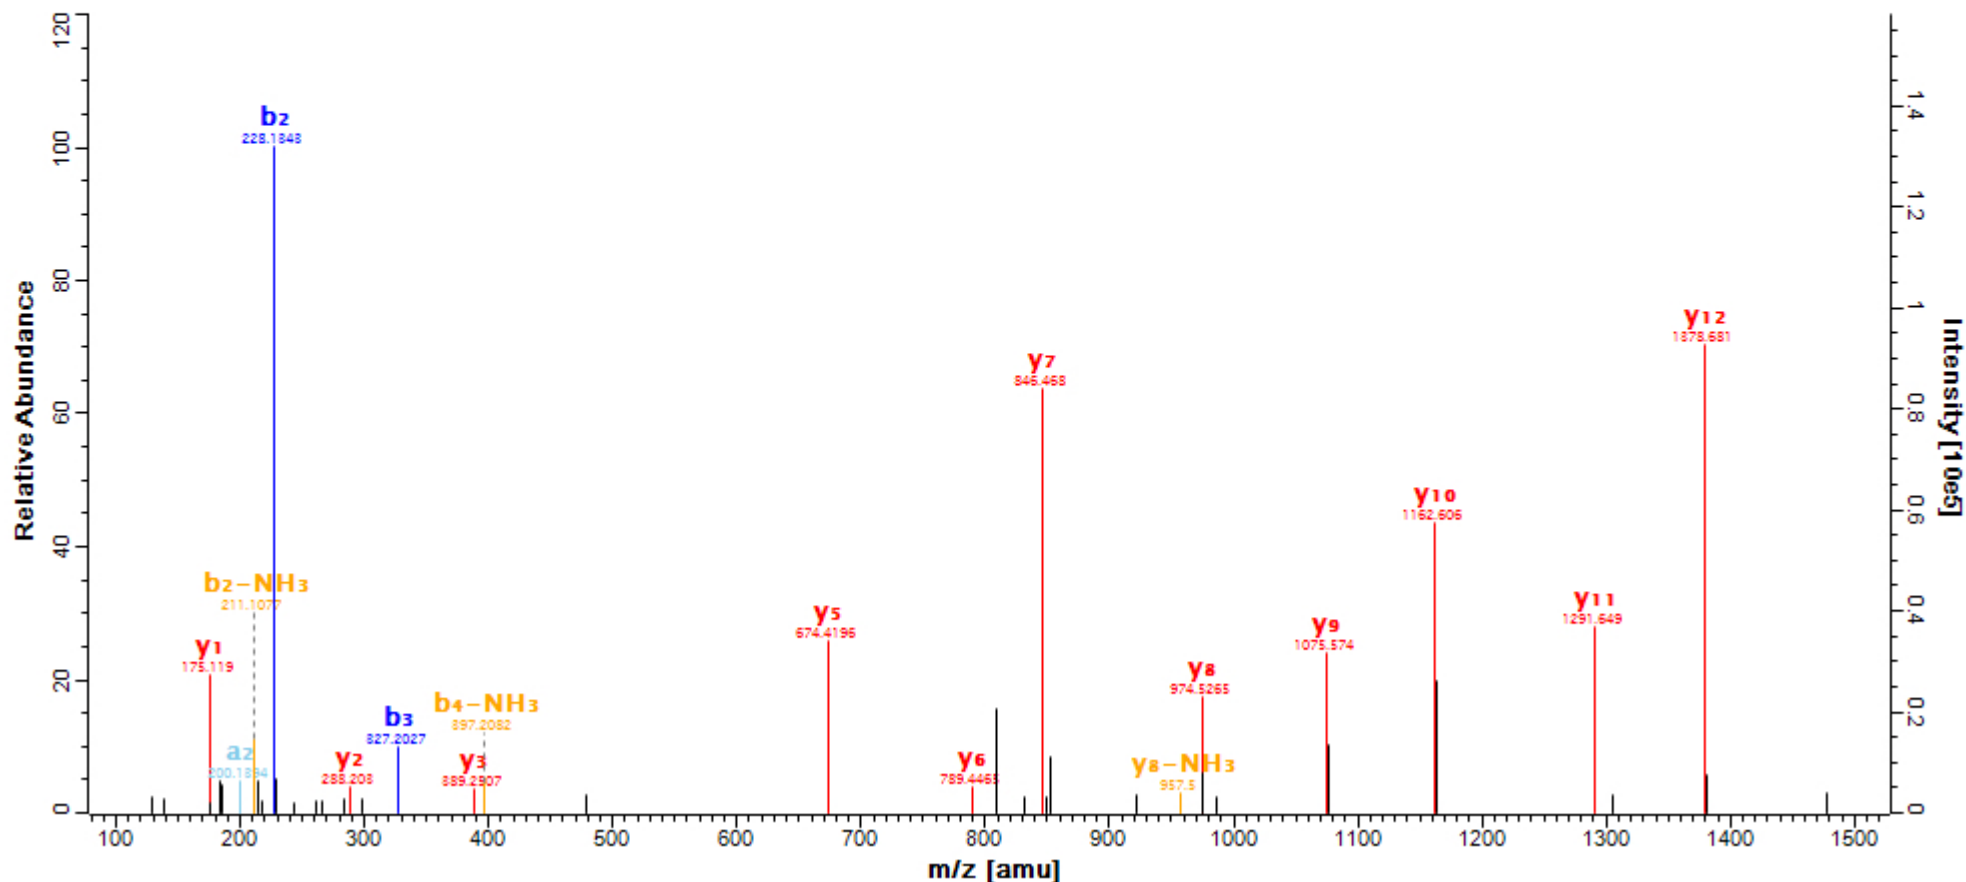

Scan number 4460 Raw file Kprop7  
 Method FTMS; HCD Peptide 79.47

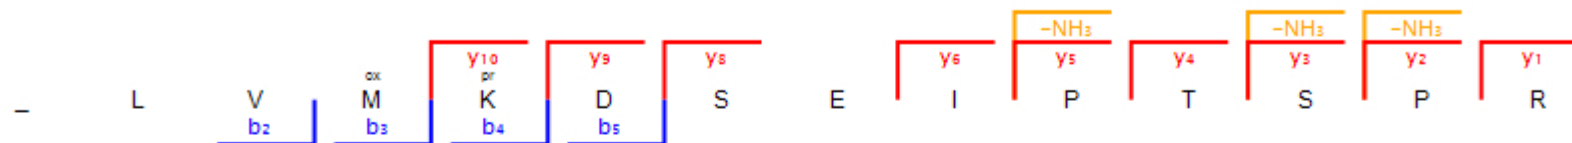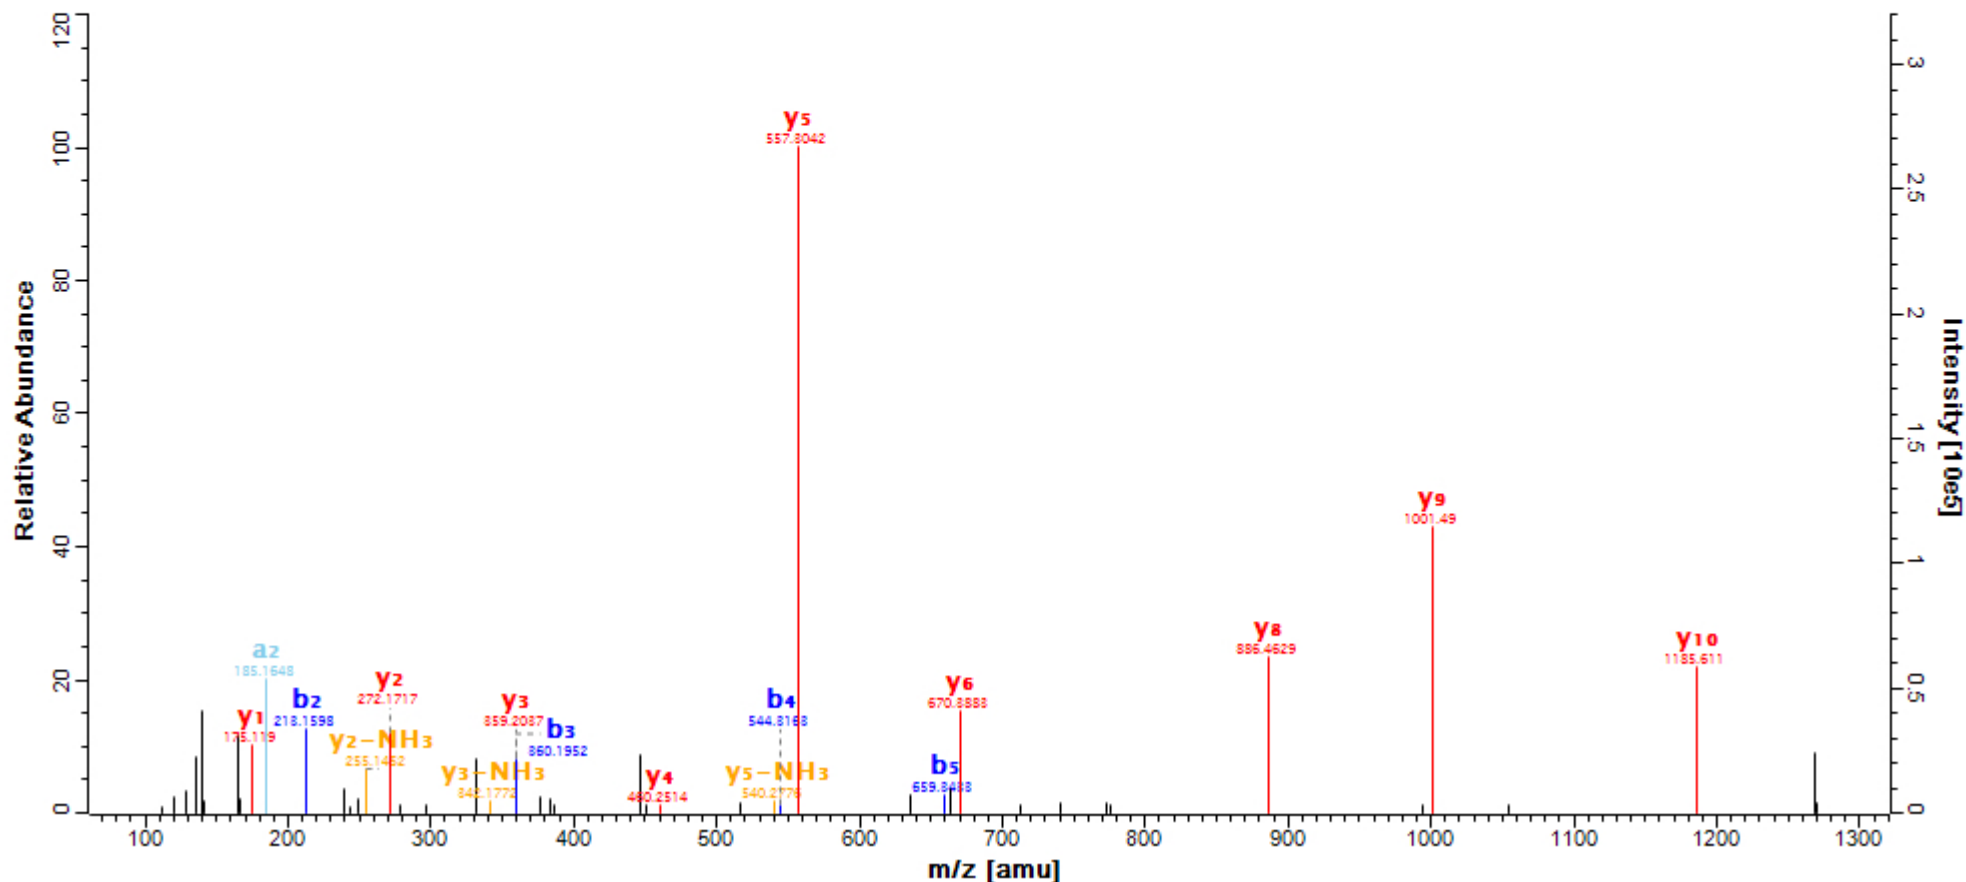

Scan number 4479 Raw file Kprop7  
Method FTMS; HCD Peptide 115.8

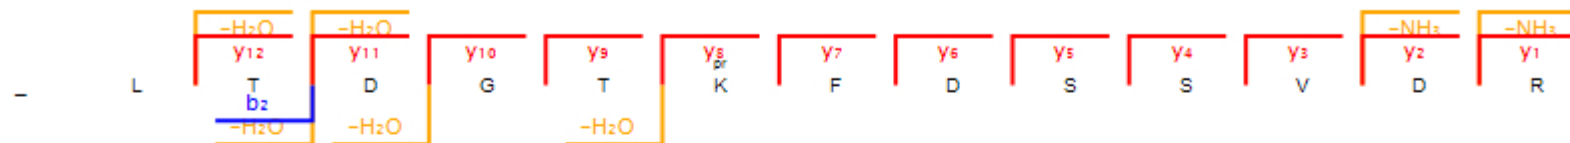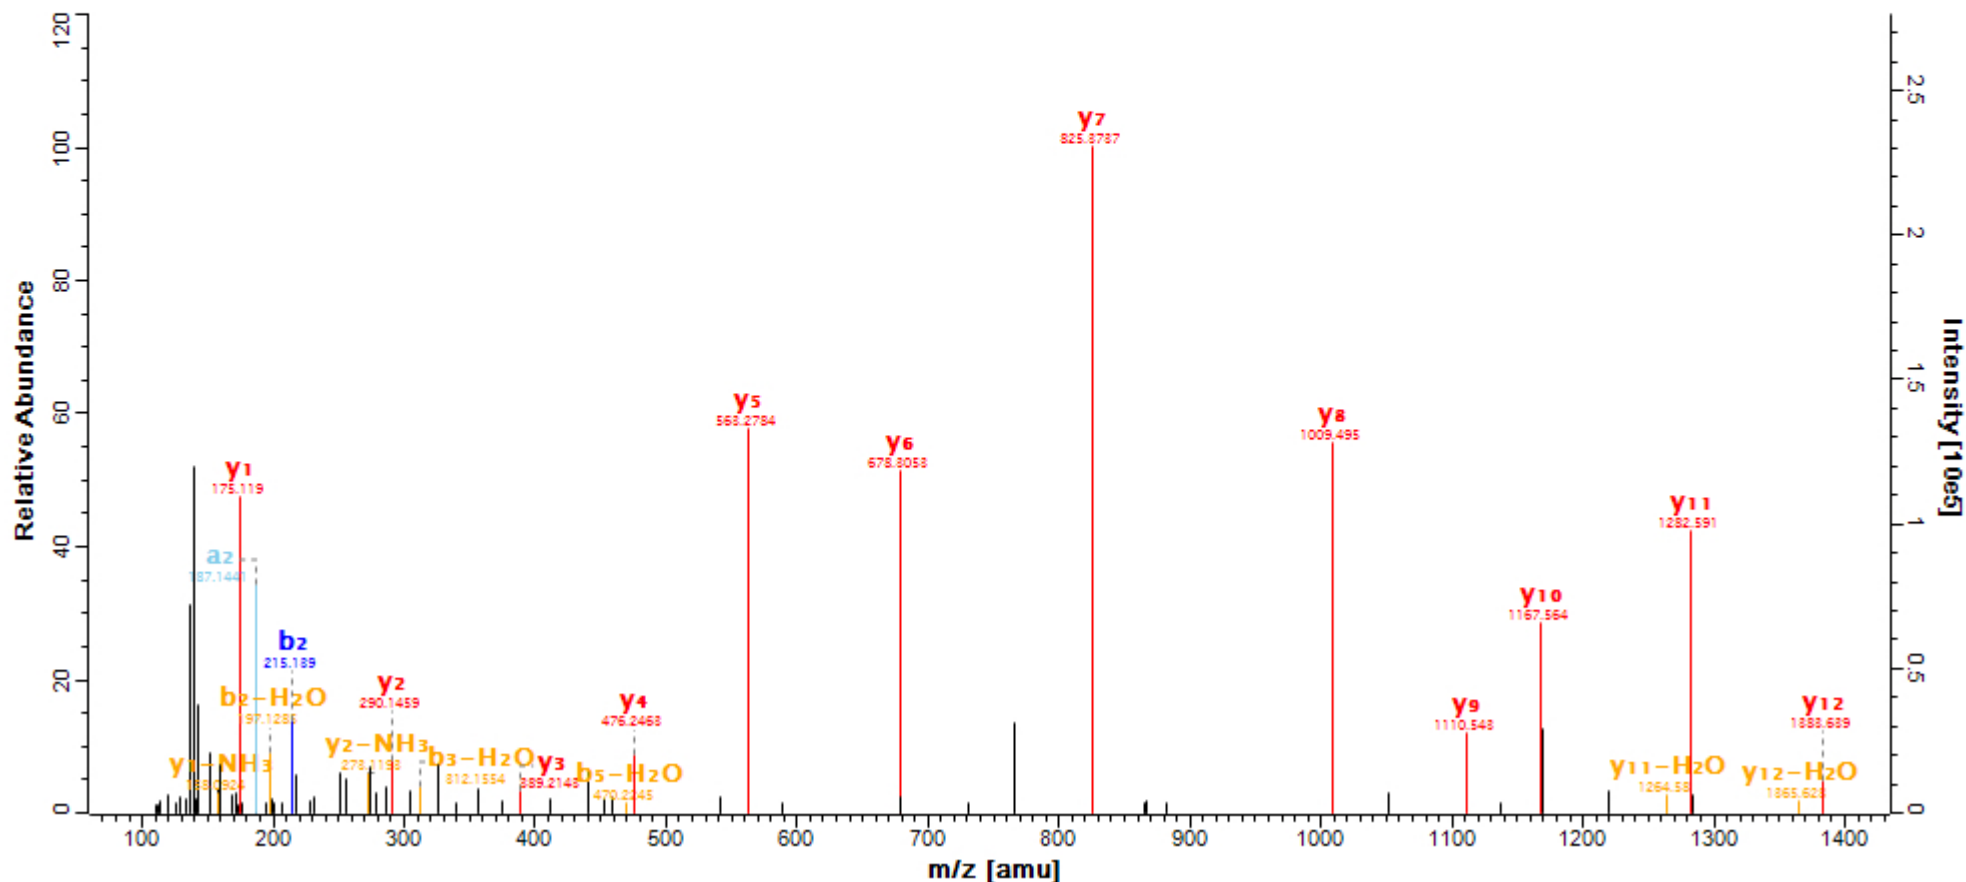

Scan number 6073  
Method FTMS; HCD

Raw file Kprop7  
Peptide 69.98

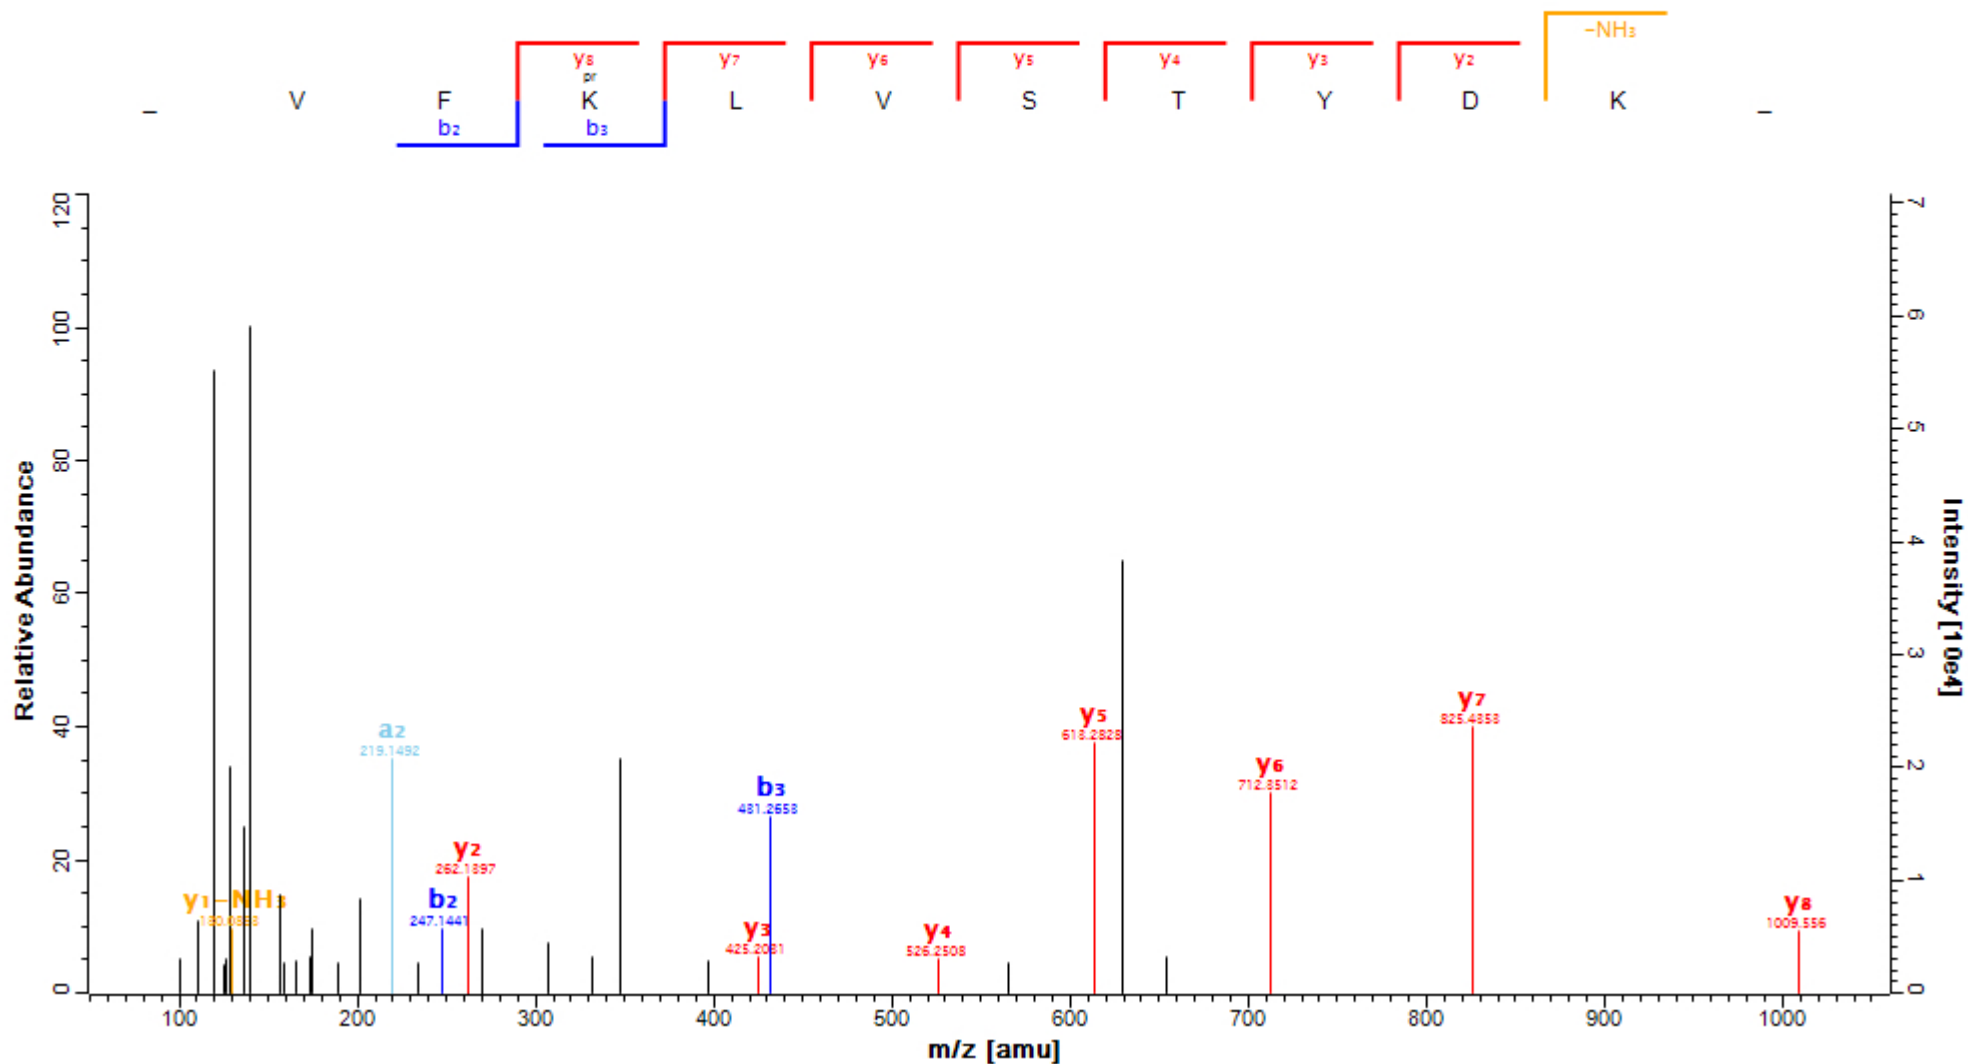

|             |           |          |        |
|-------------|-----------|----------|--------|
| Scan number | 7915      | Raw file | Kprop7 |
| Method      | FTMS; HCD | Pepti... | 59.18  |

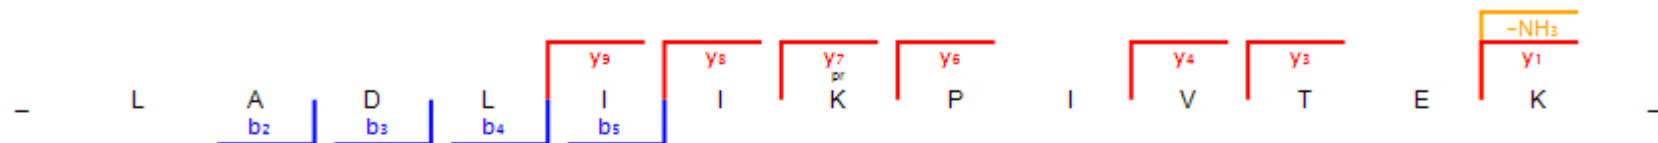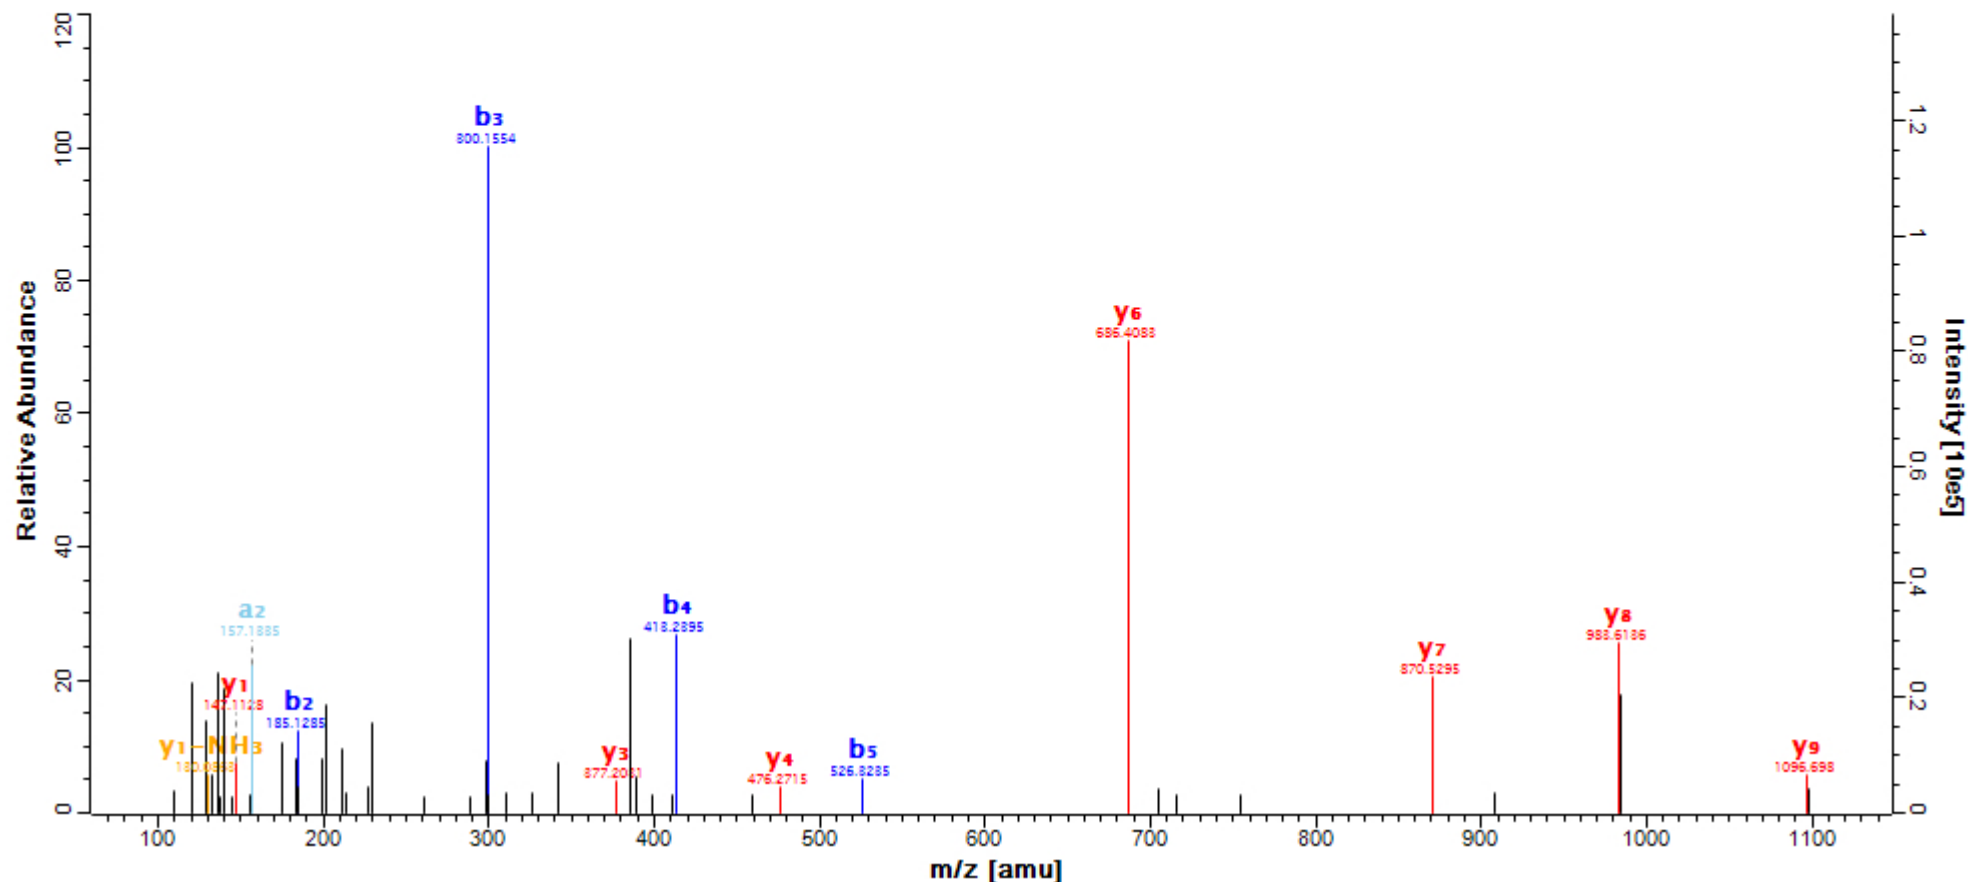



Scan number 8043  
Method FTMS; HCD

Raw file Kprop7  
Peptide 86.38

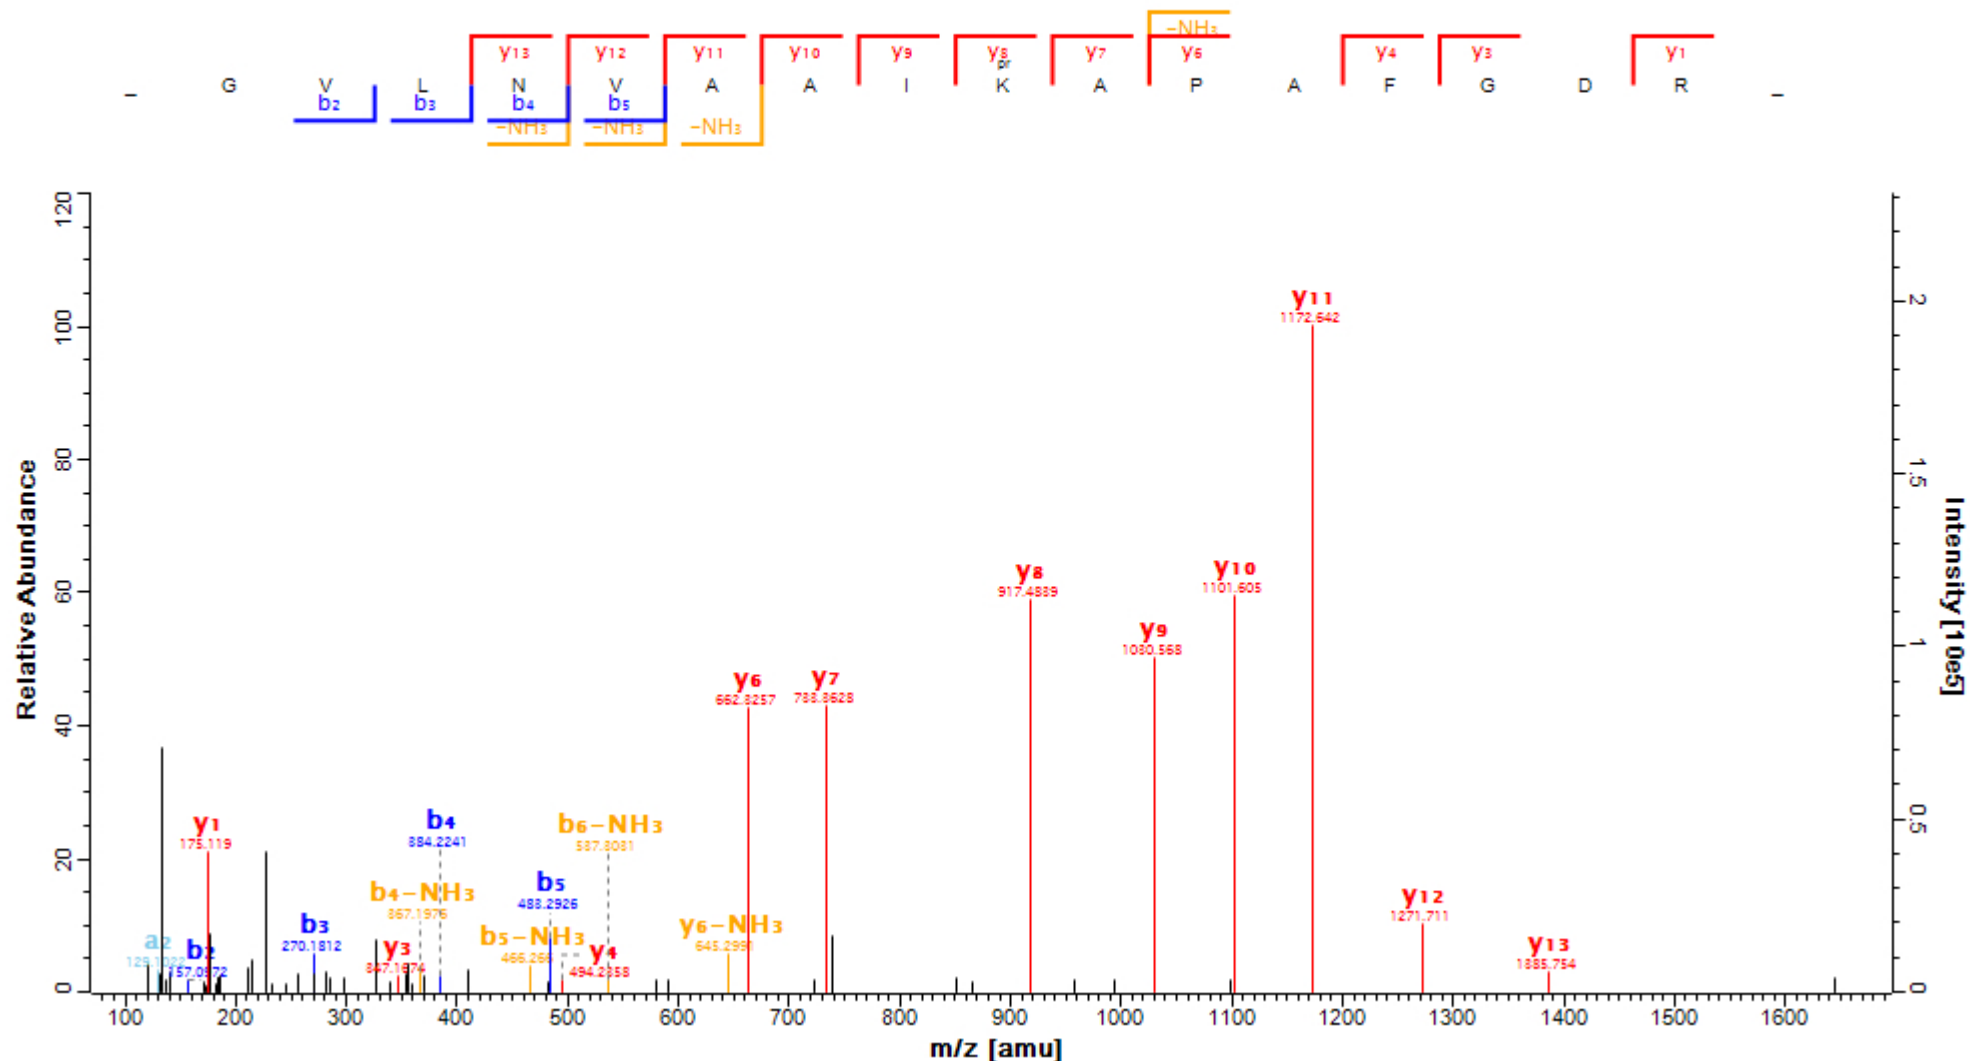

Scan number 3534 Raw file Kprop8  
Method FTMS; HCD Peptide 87.52

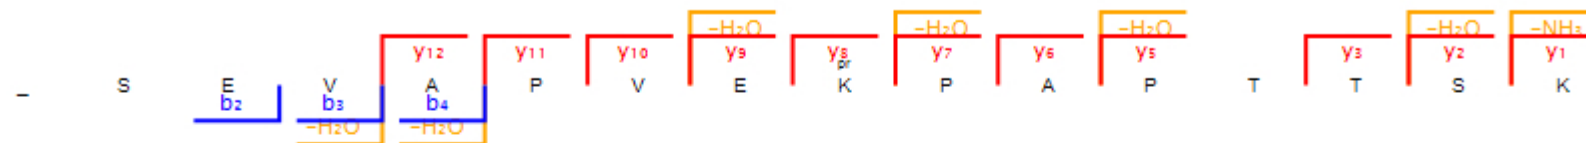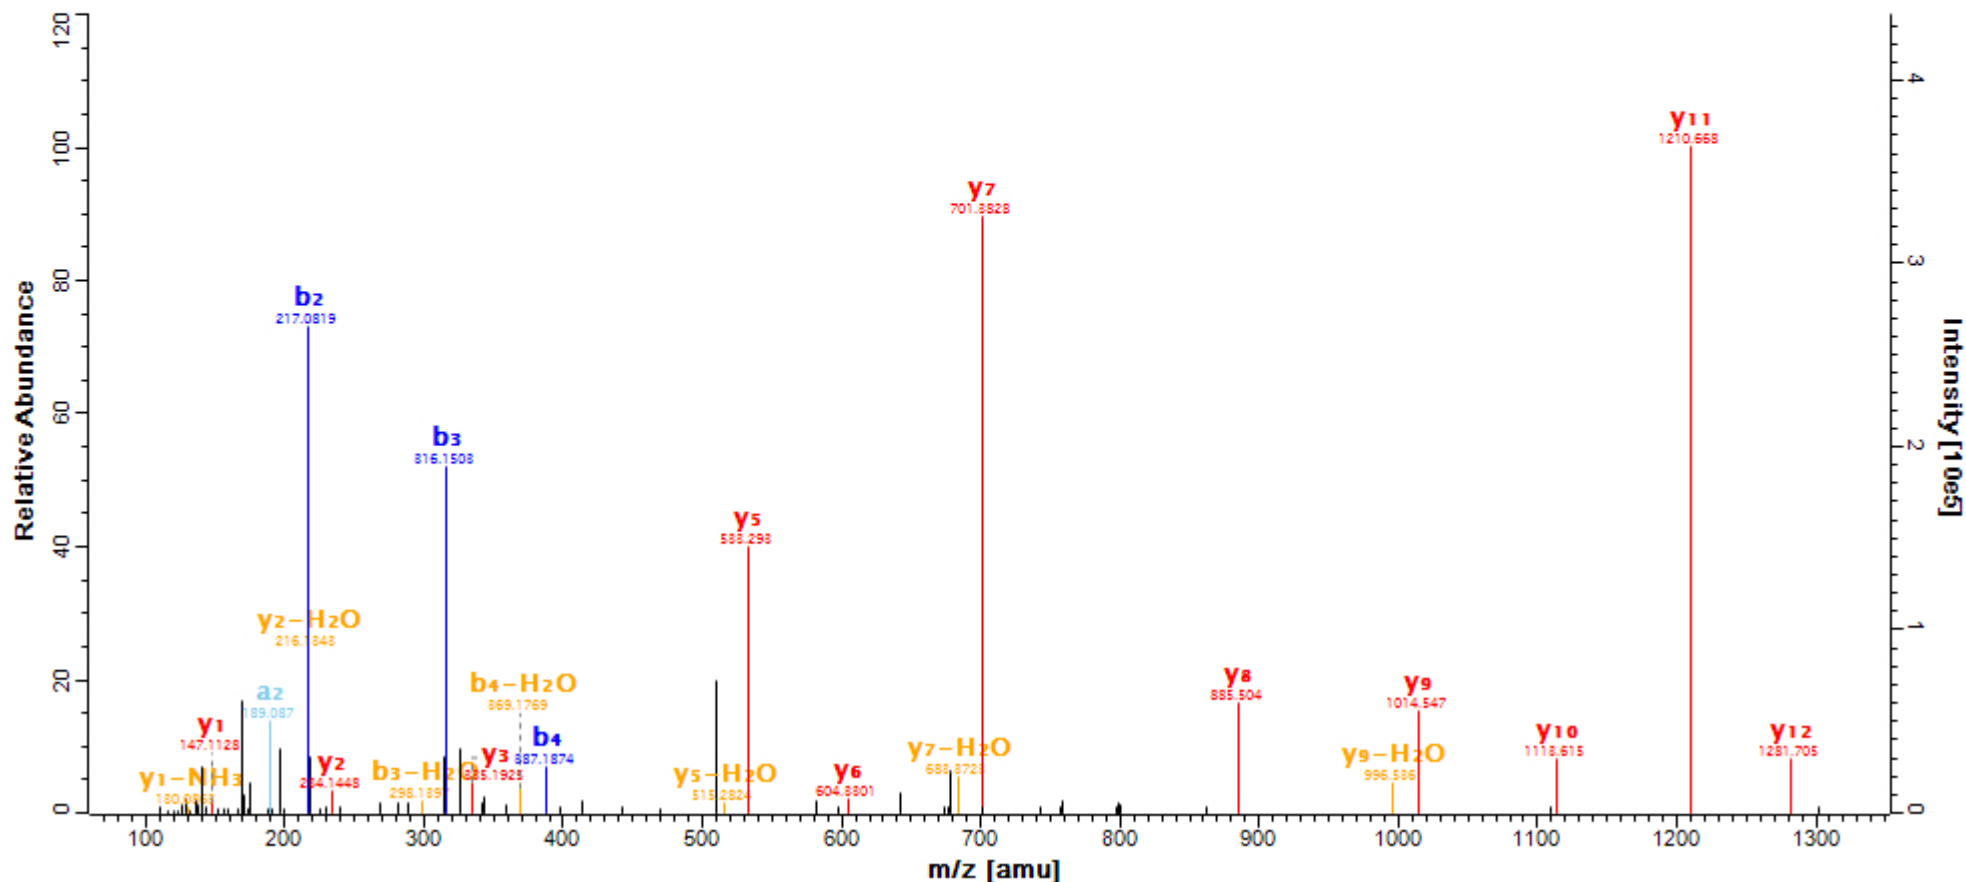

Scan number 3566  
Method FTMS; HCD

Raw file Kprop8  
Peptide 86.31

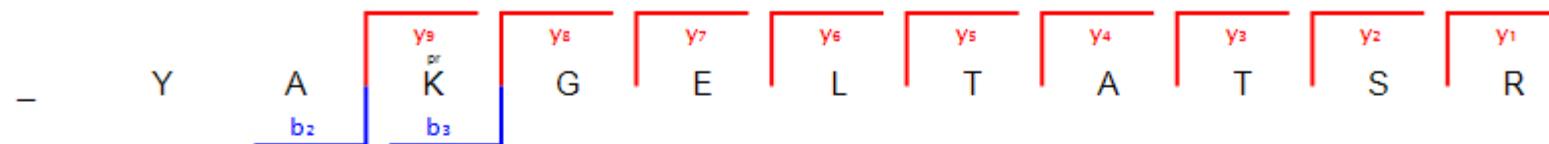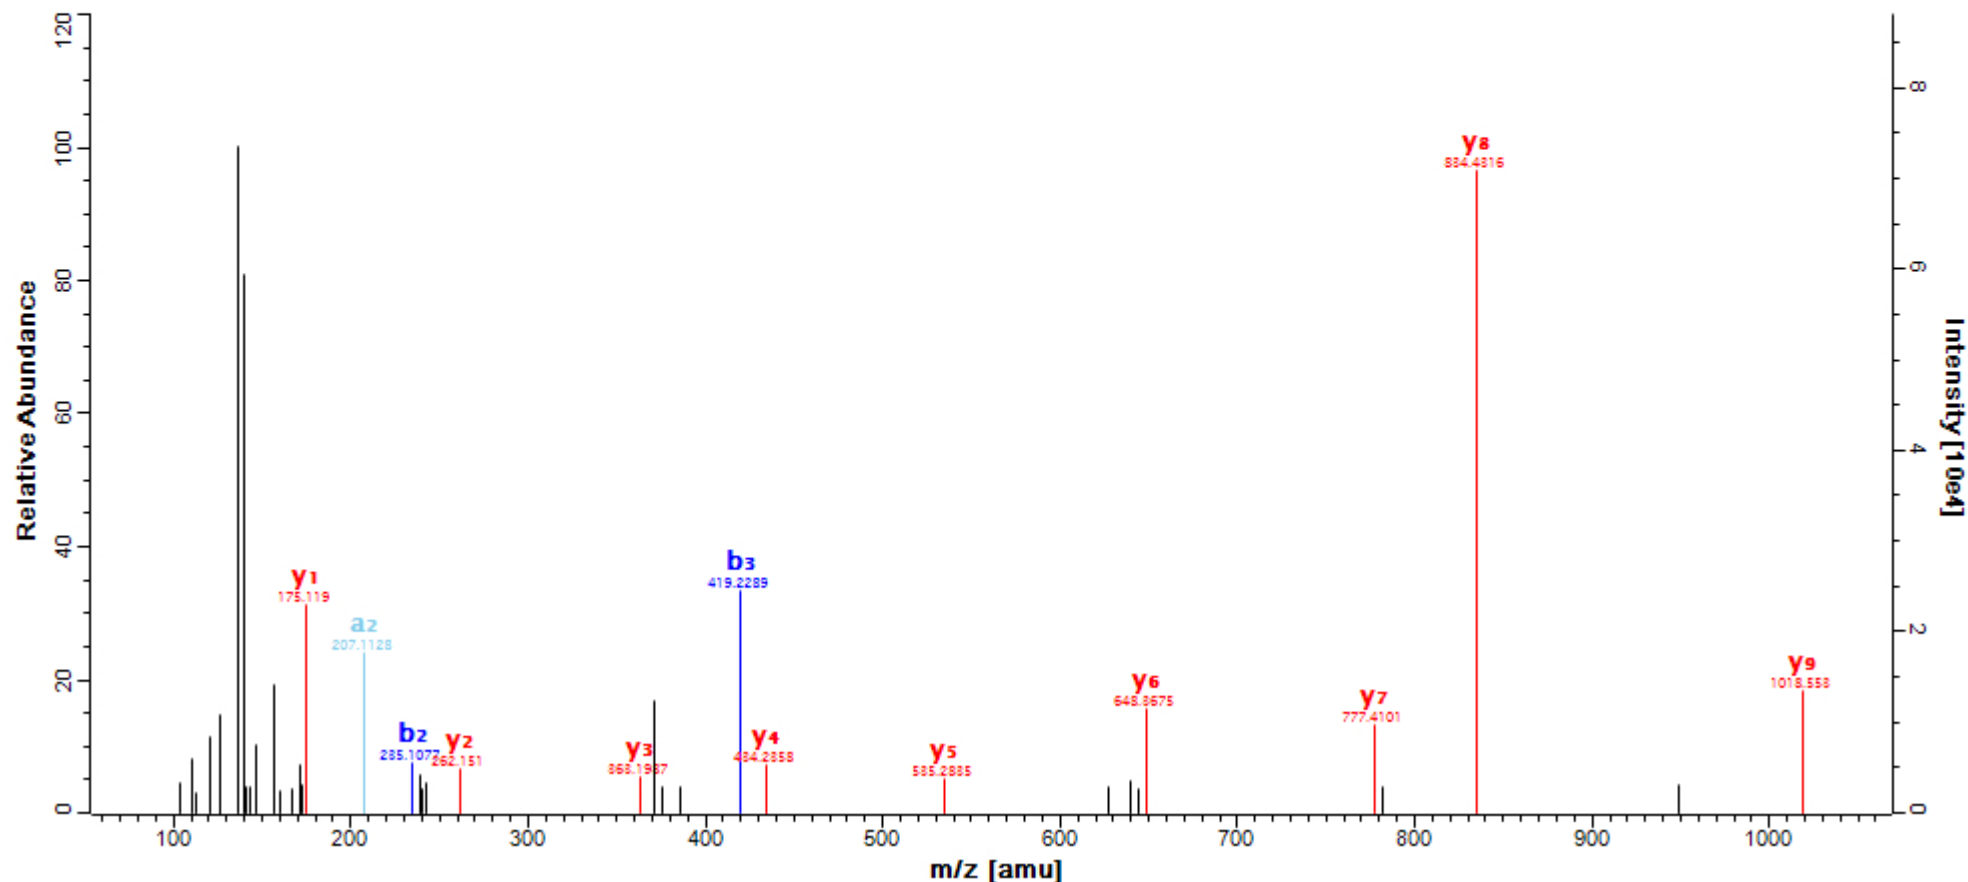

|             |           |          |        |
|-------------|-----------|----------|--------|
| Scan number | 3626      | Raw file | Kprop8 |
| Method      | FTMS; HCD | Pepti... | 83.62  |

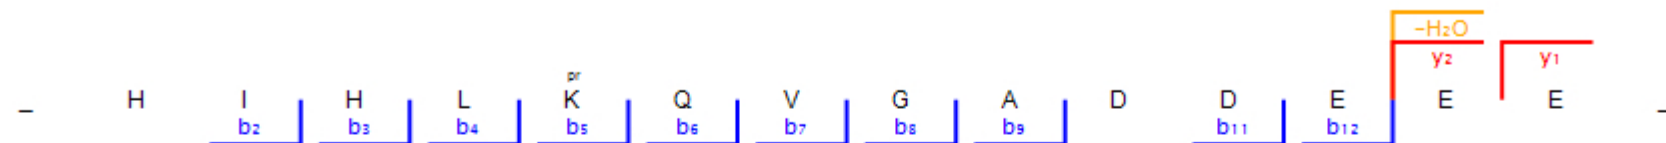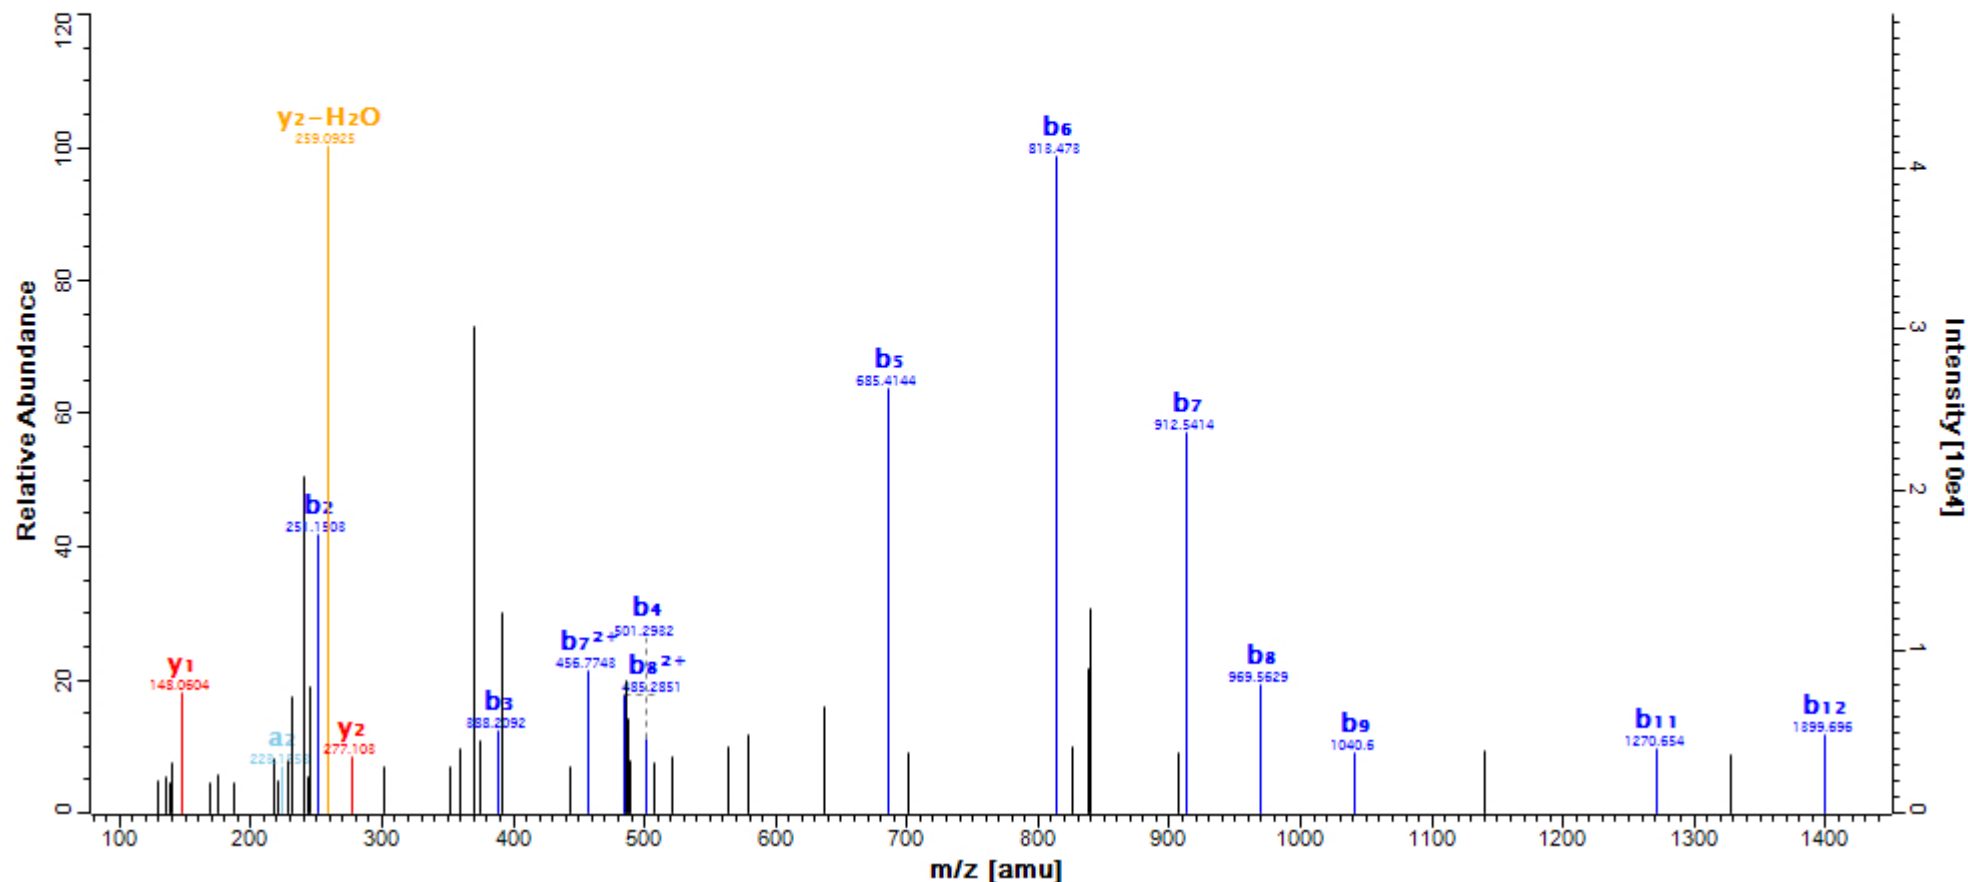

|             |           |          |        |
|-------------|-----------|----------|--------|
| Scan number | 4287      | Raw file | Kprop8 |
| Method      | FTMS; HCD | Pepti... | 70.62  |

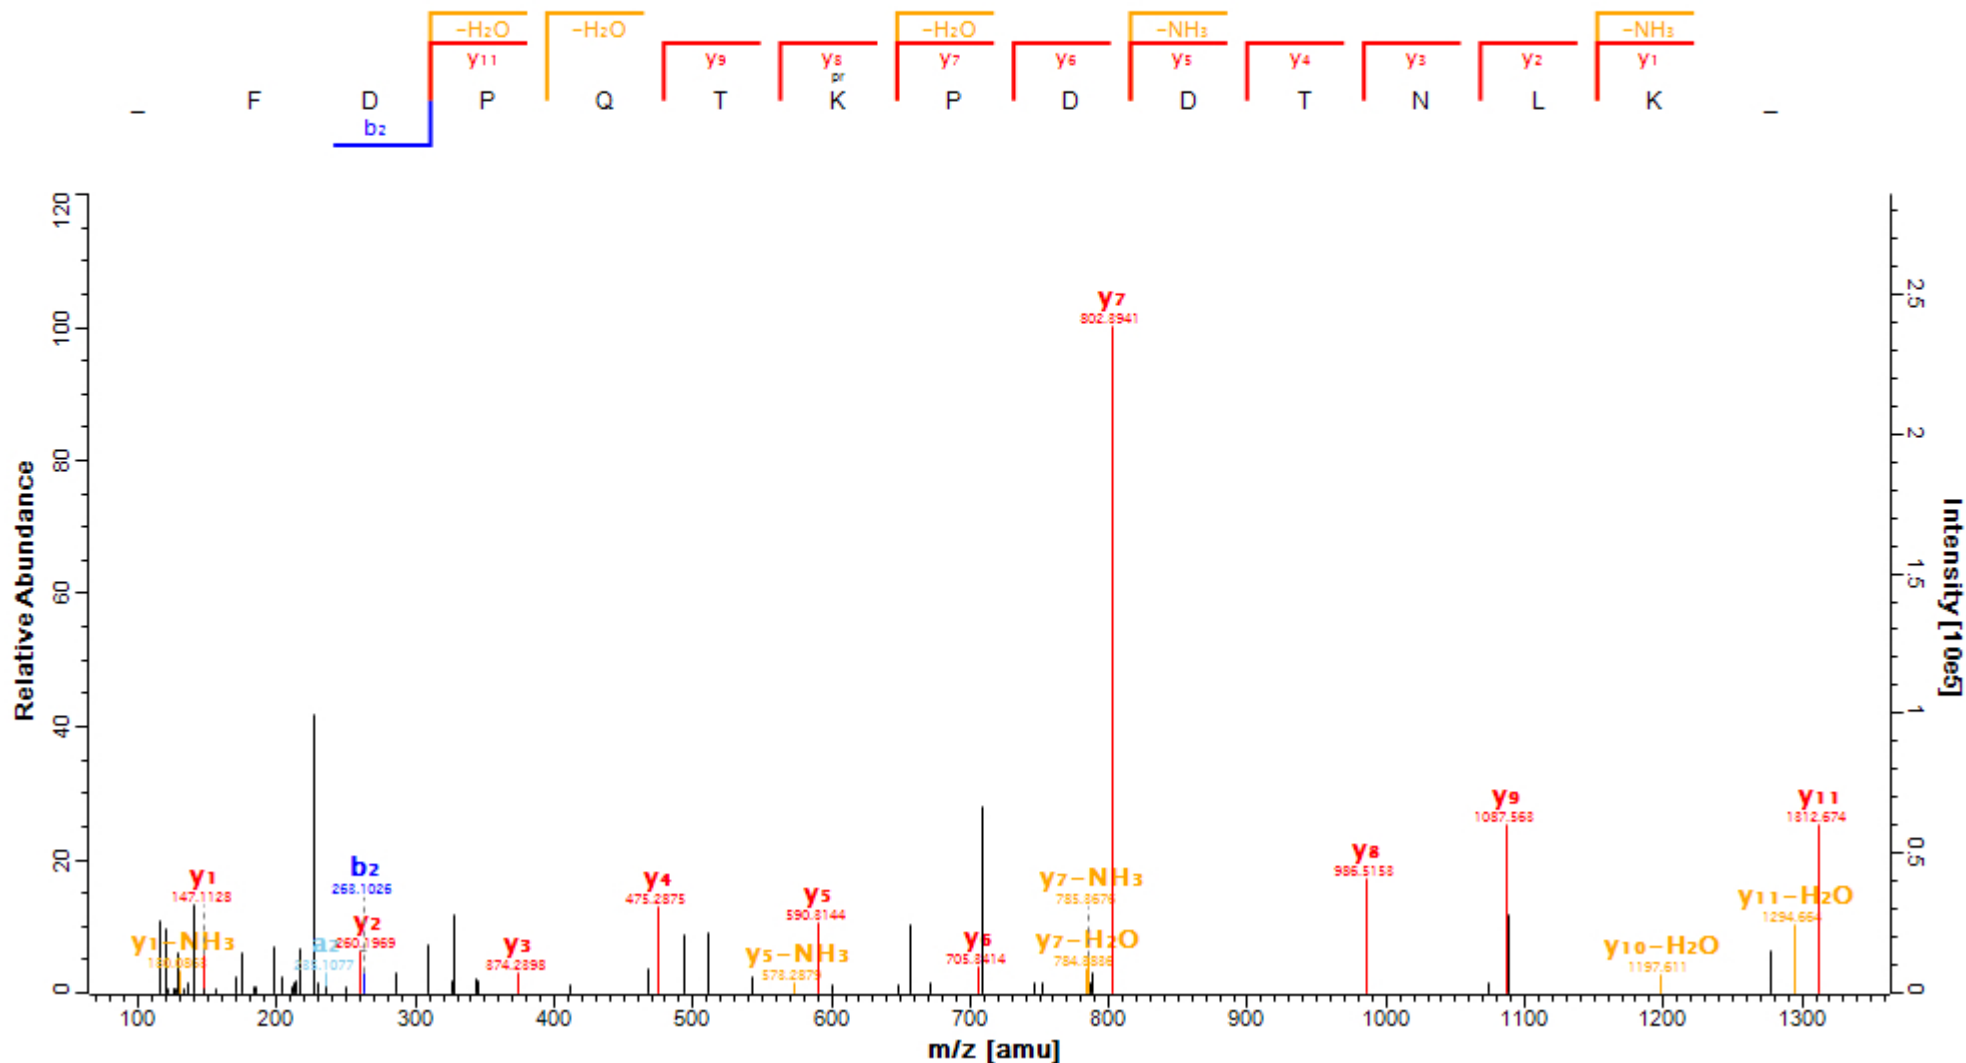

Scan number 4332  
Method FTMS; HCD

Raw file Kprop8  
Peptide 87.18

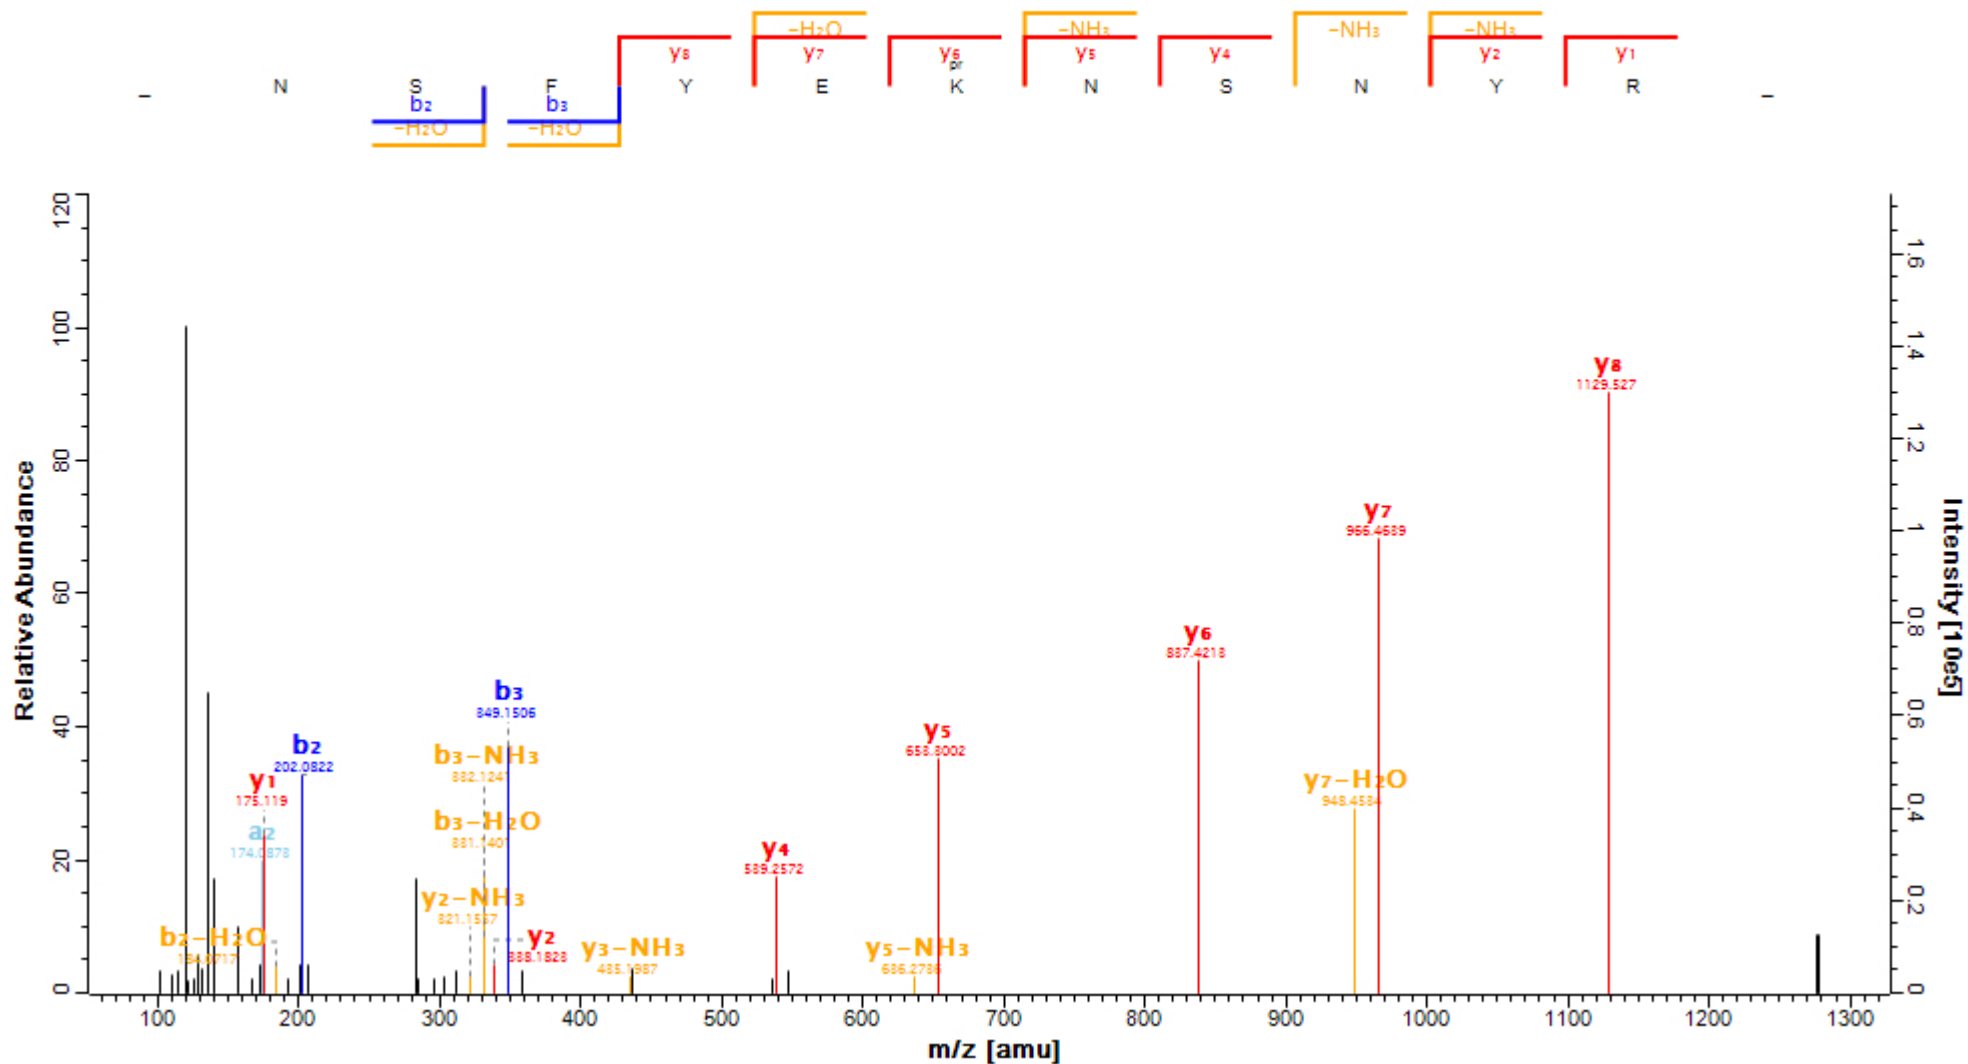

Scan number 4336  
Method FTMS; HCD

Raw file Kprop8  
Peptide 76.66

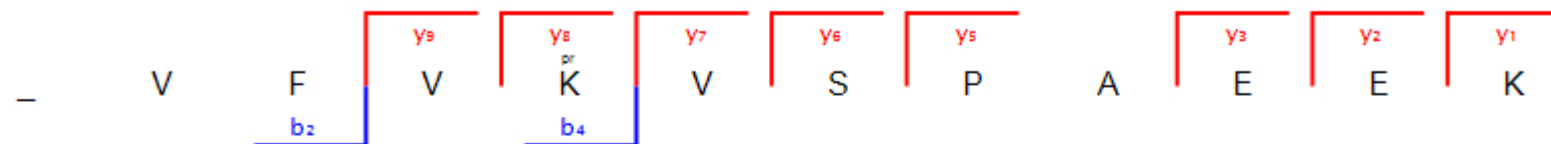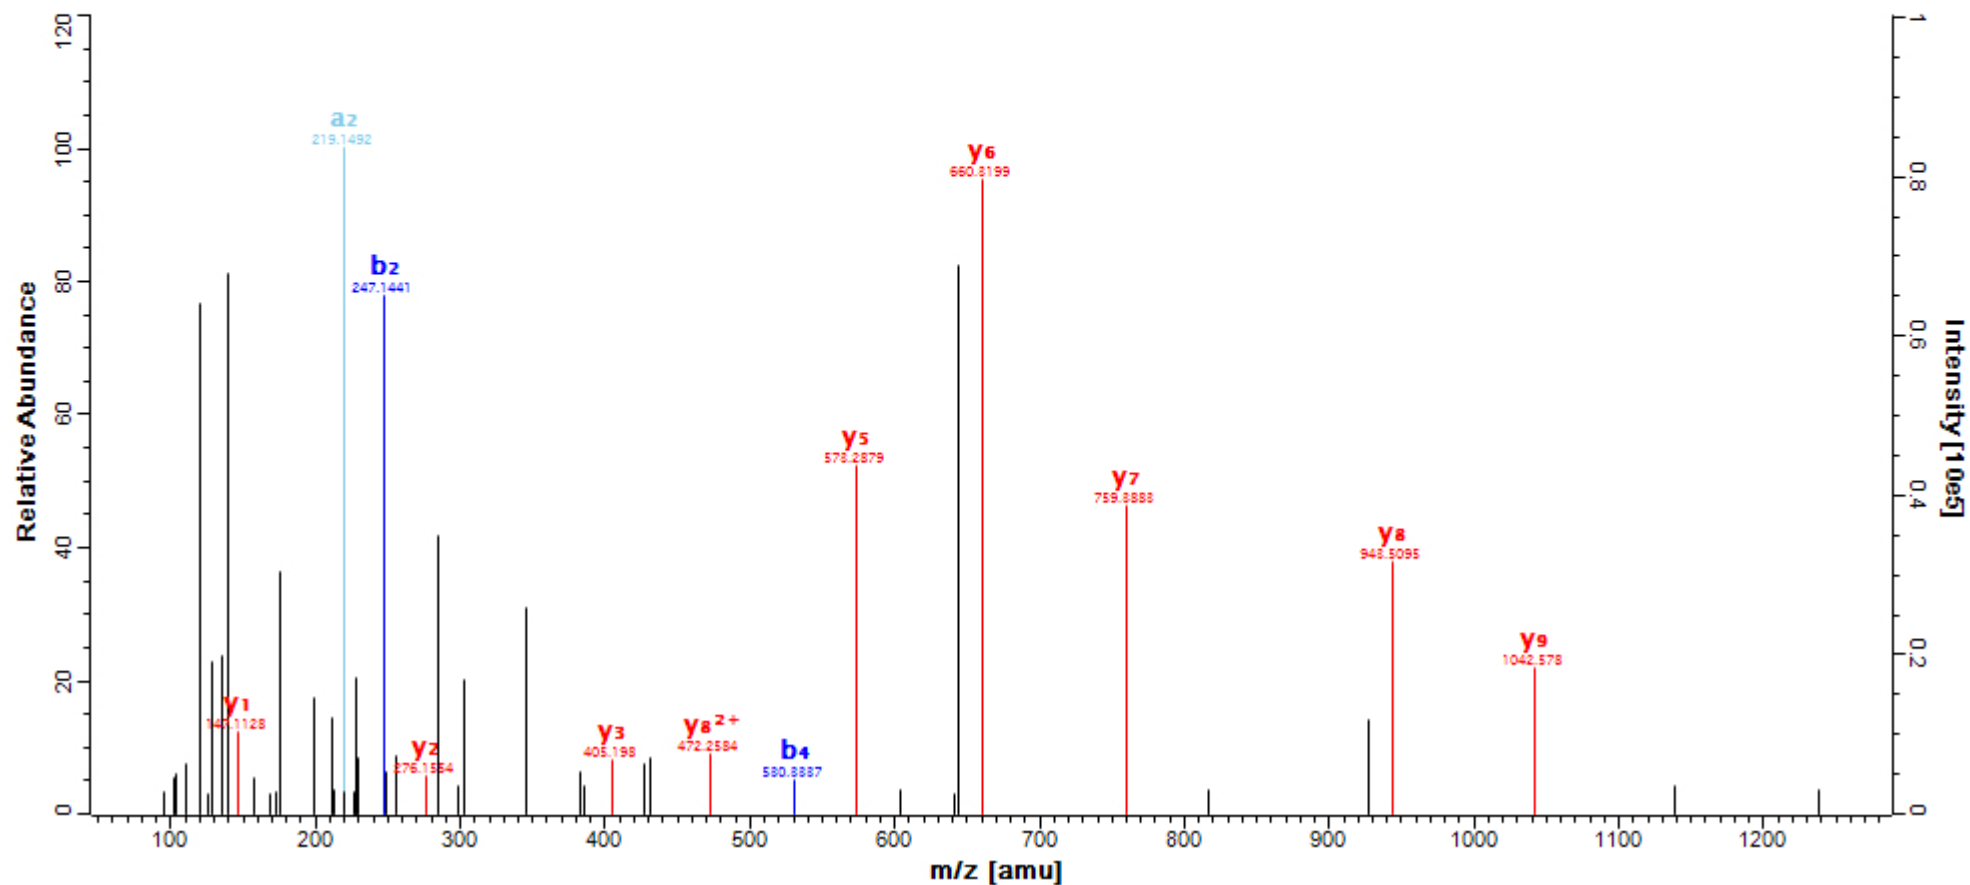

Scan number 4653 Raw file Kprop8  
 Method FTMS; HCD Peptide 134.56

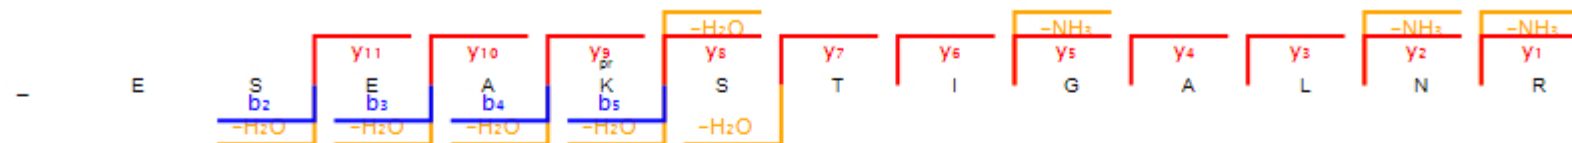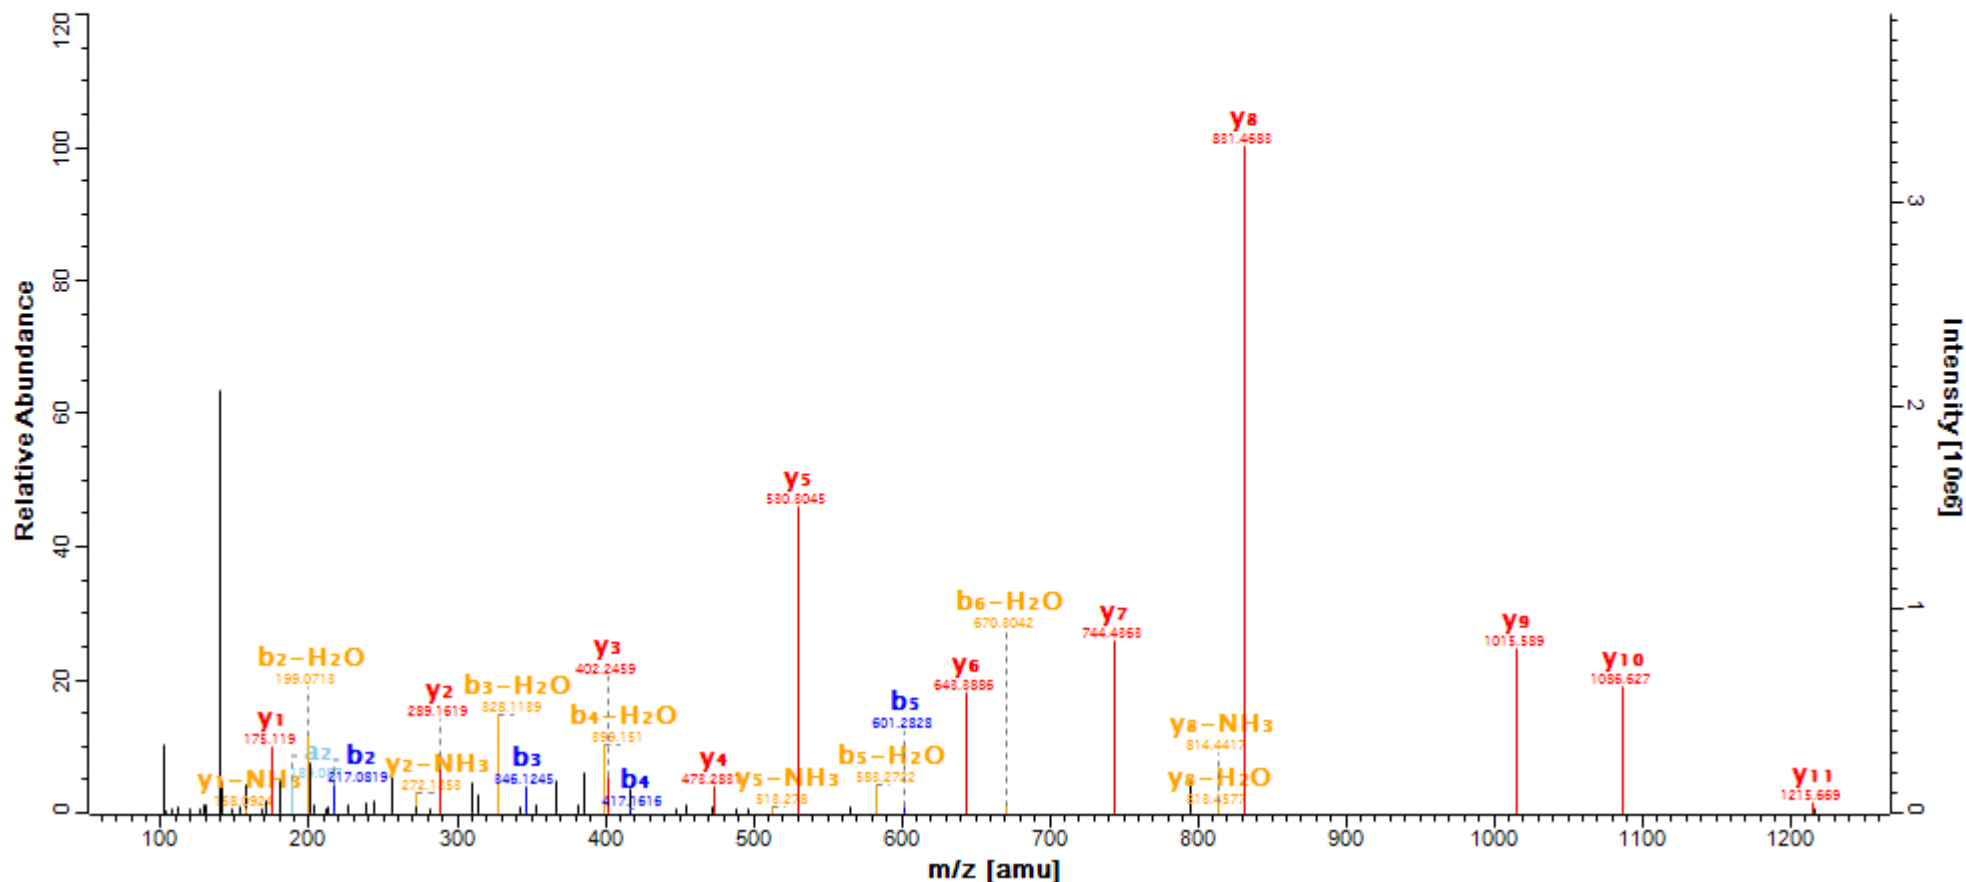



|             |           |          |        |
|-------------|-----------|----------|--------|
| Scan number | 5147      | Raw file | Kprop8 |
| Method      | FTMS; HCD | Pepti... | 55.45  |

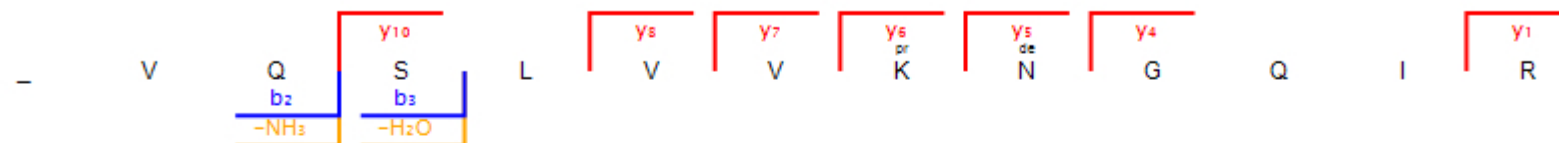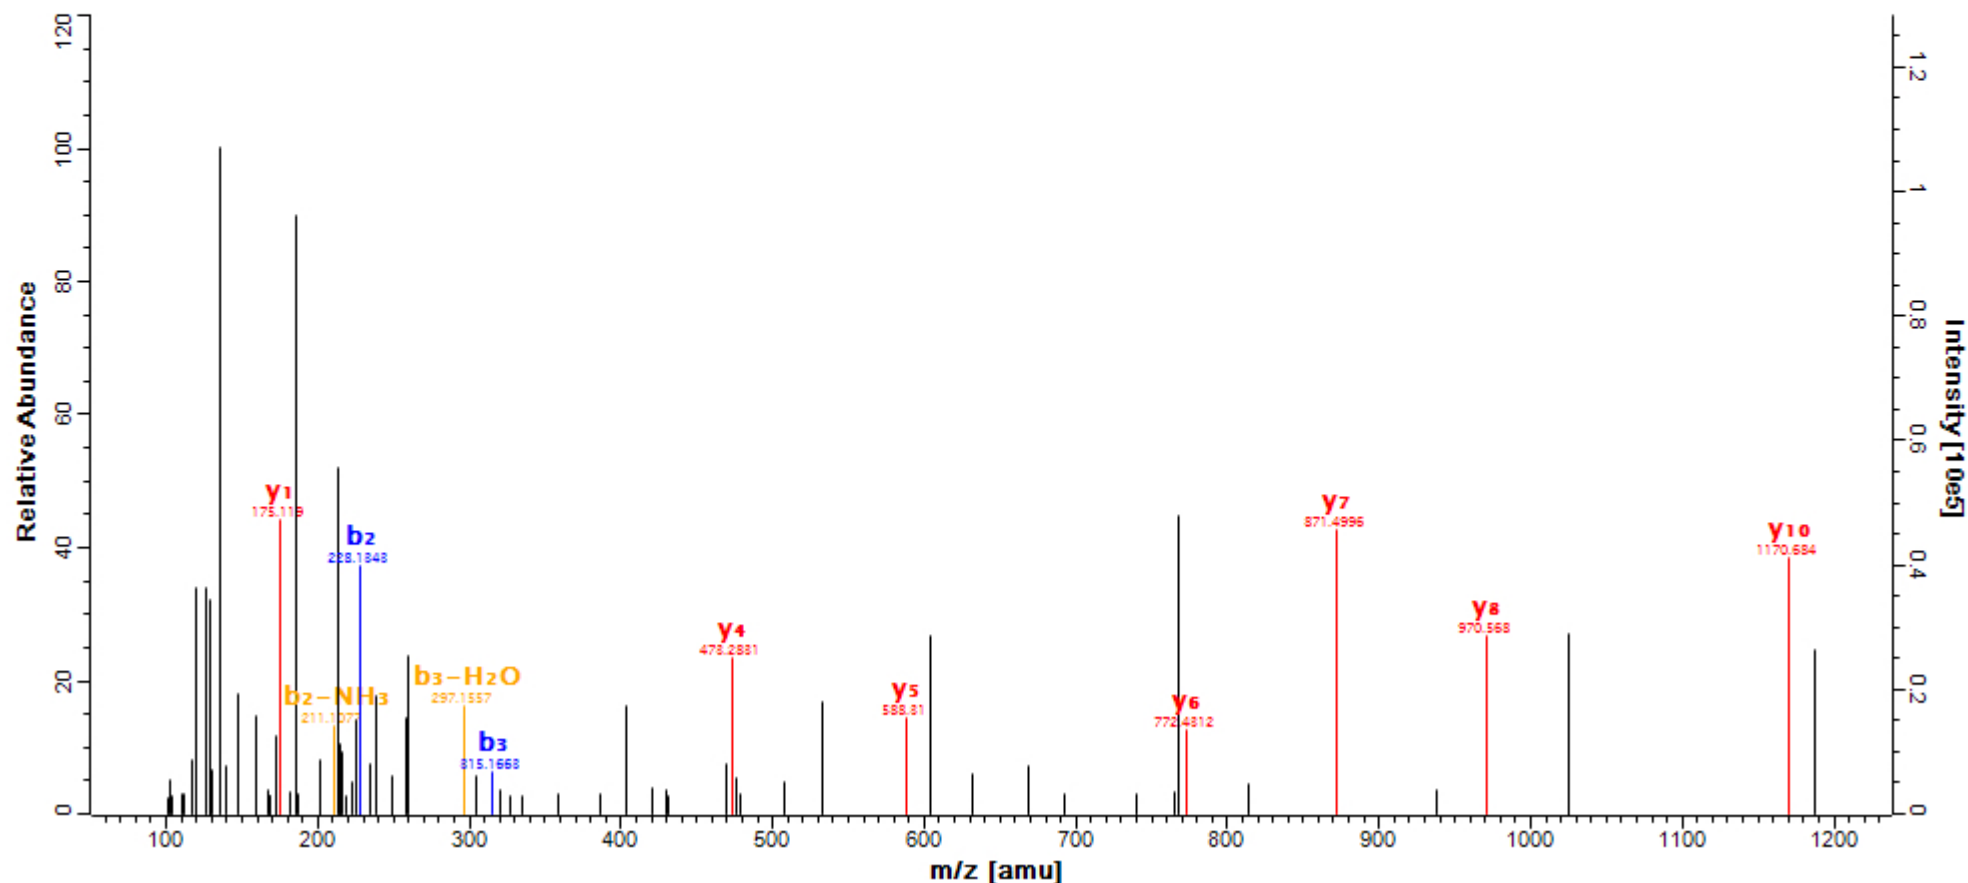

Scan number 5199  
Method FTMS; HCD

Raw file Kprop8  
Peptide 31.67

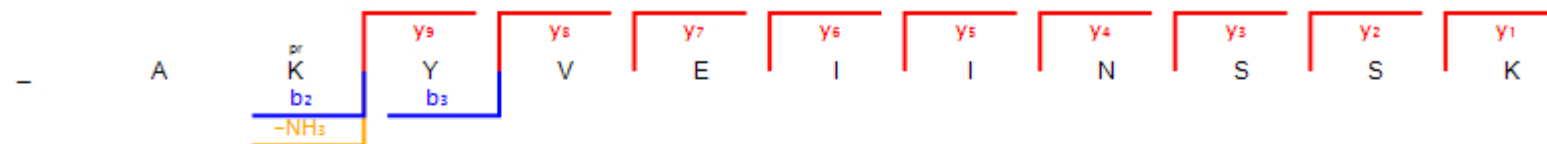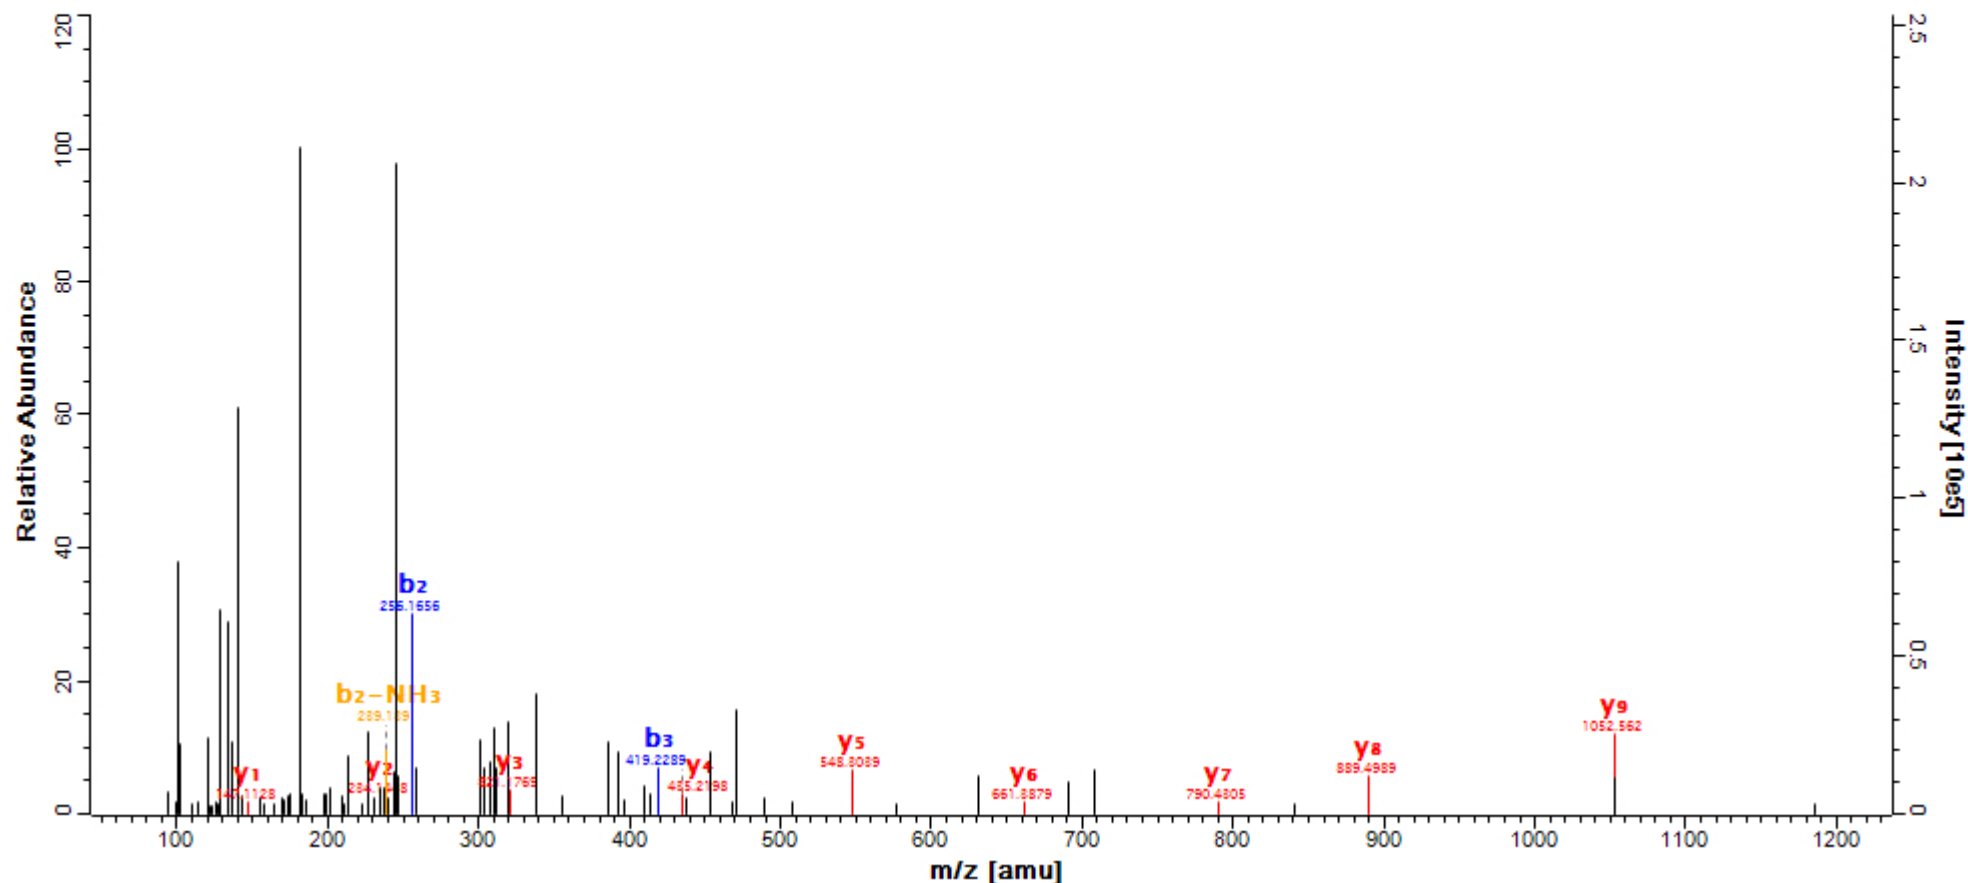

Scan number 5371  
Method FTMS; HCD

Raw file Kprop8  
Peptide 116.23

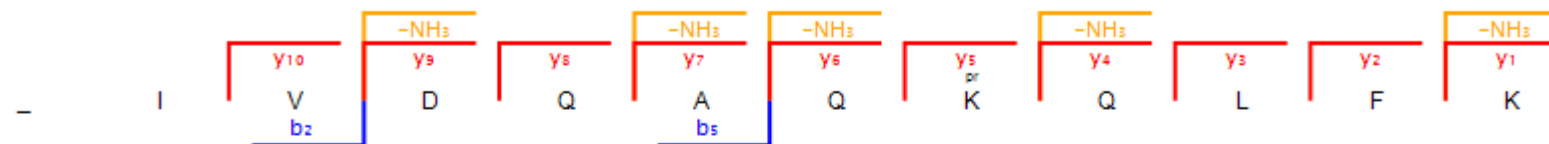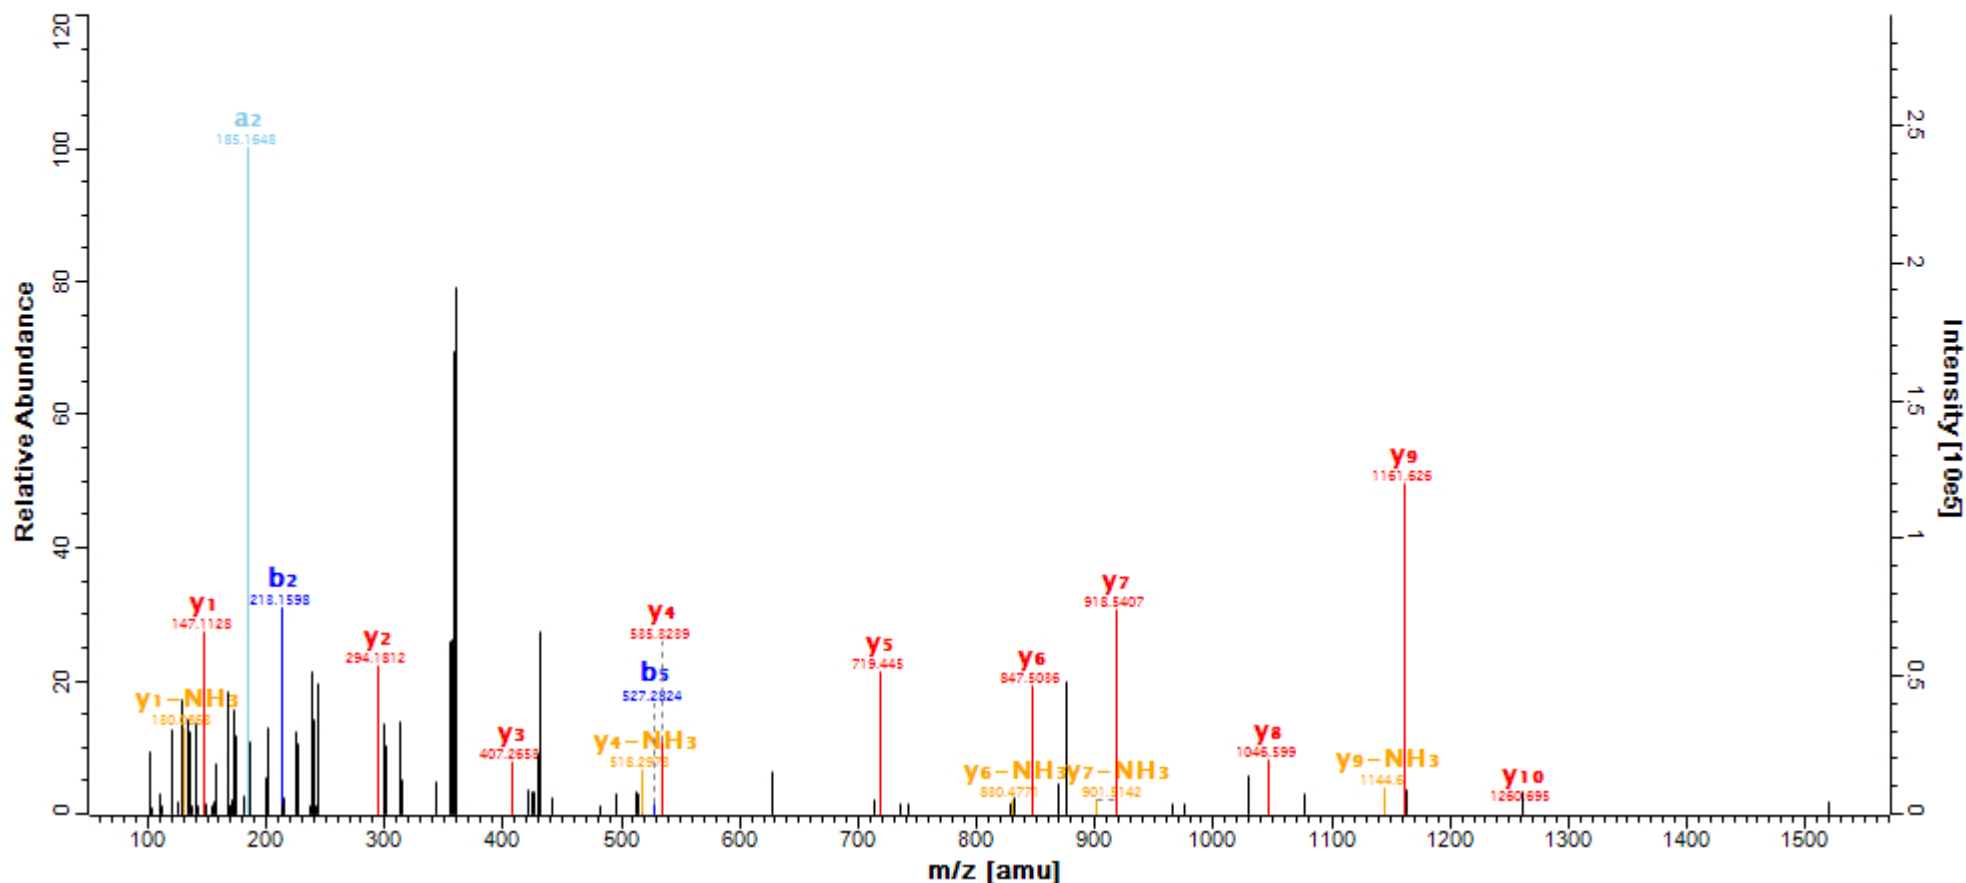

Scan number 5644 Raw file Kprop8  
 Method FTMS; HCD Peptide 76.59

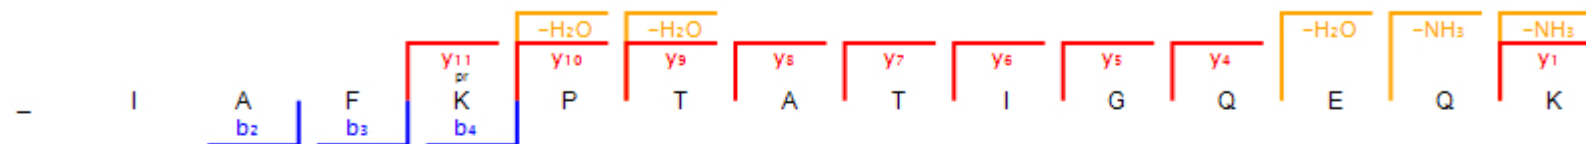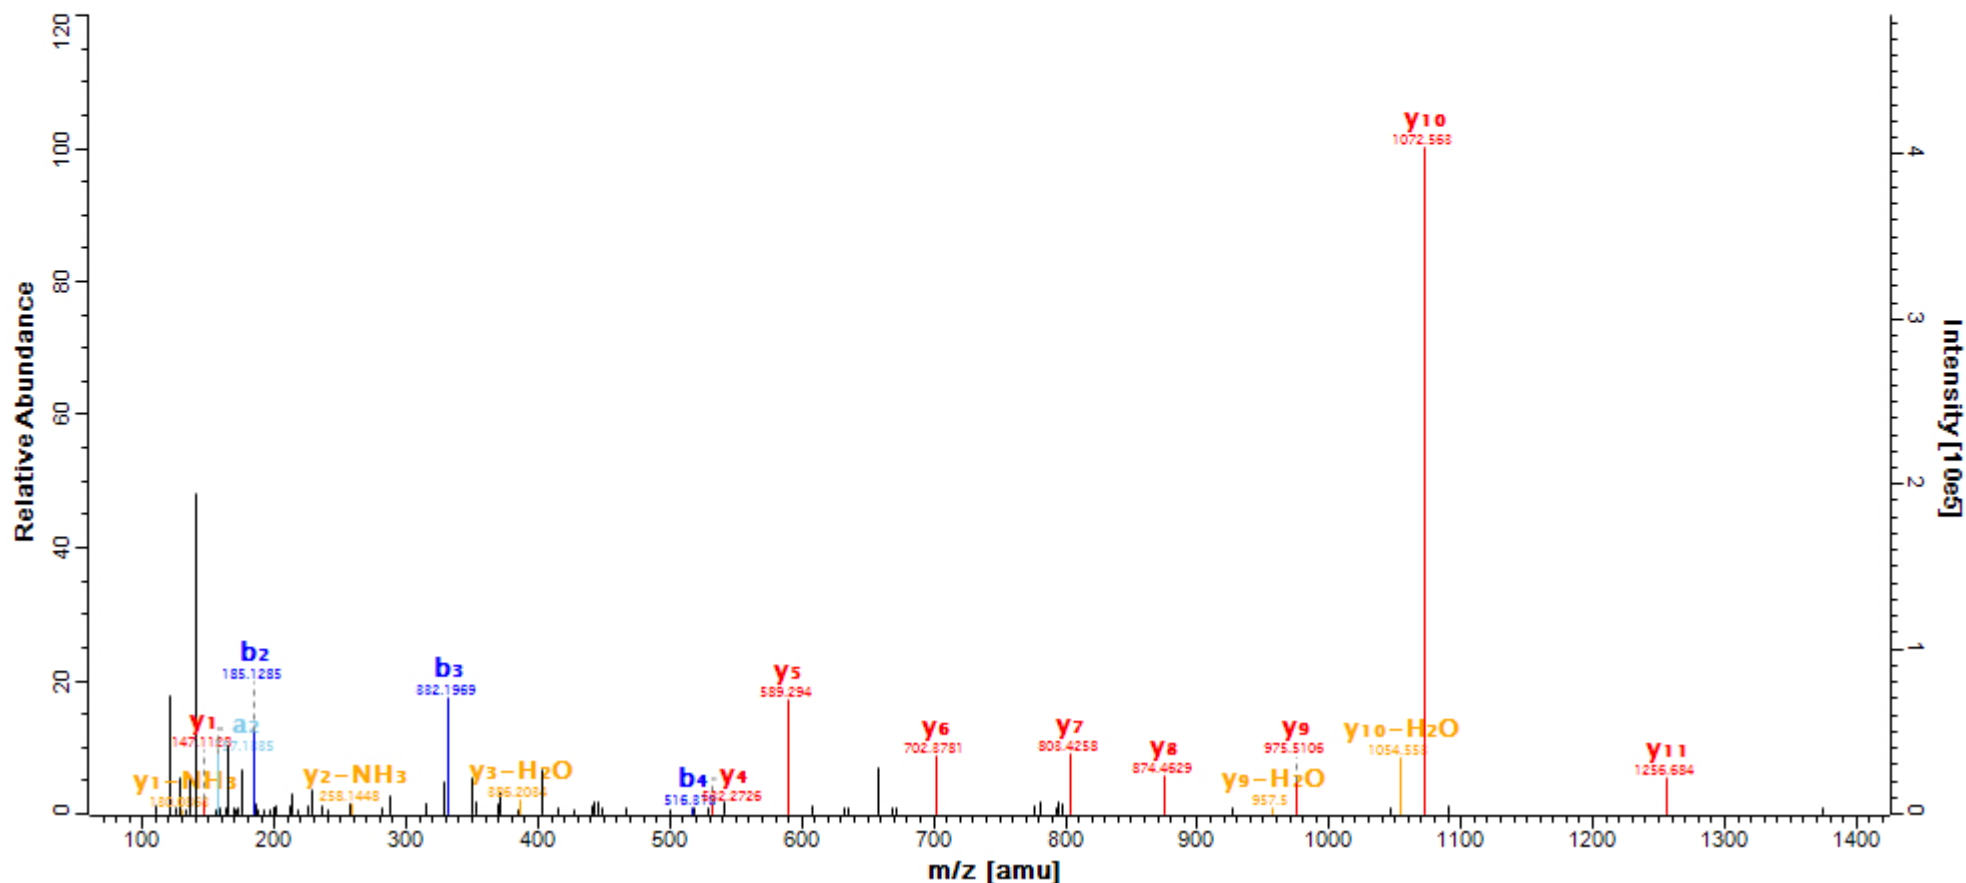

Scan number 5650 Raw file Kprop8  
 Method FTMS; HCD Peptide 115.8

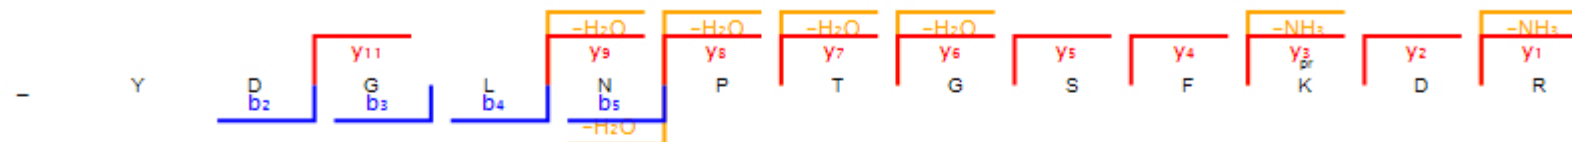

Scan number 6305  
Method FTMS; HCD

Raw file Kprop8  
Peptide 45.16

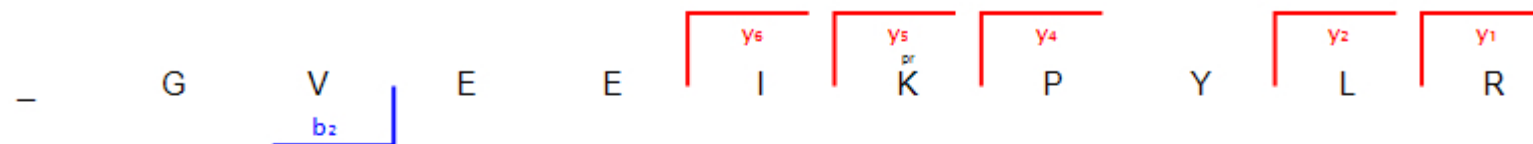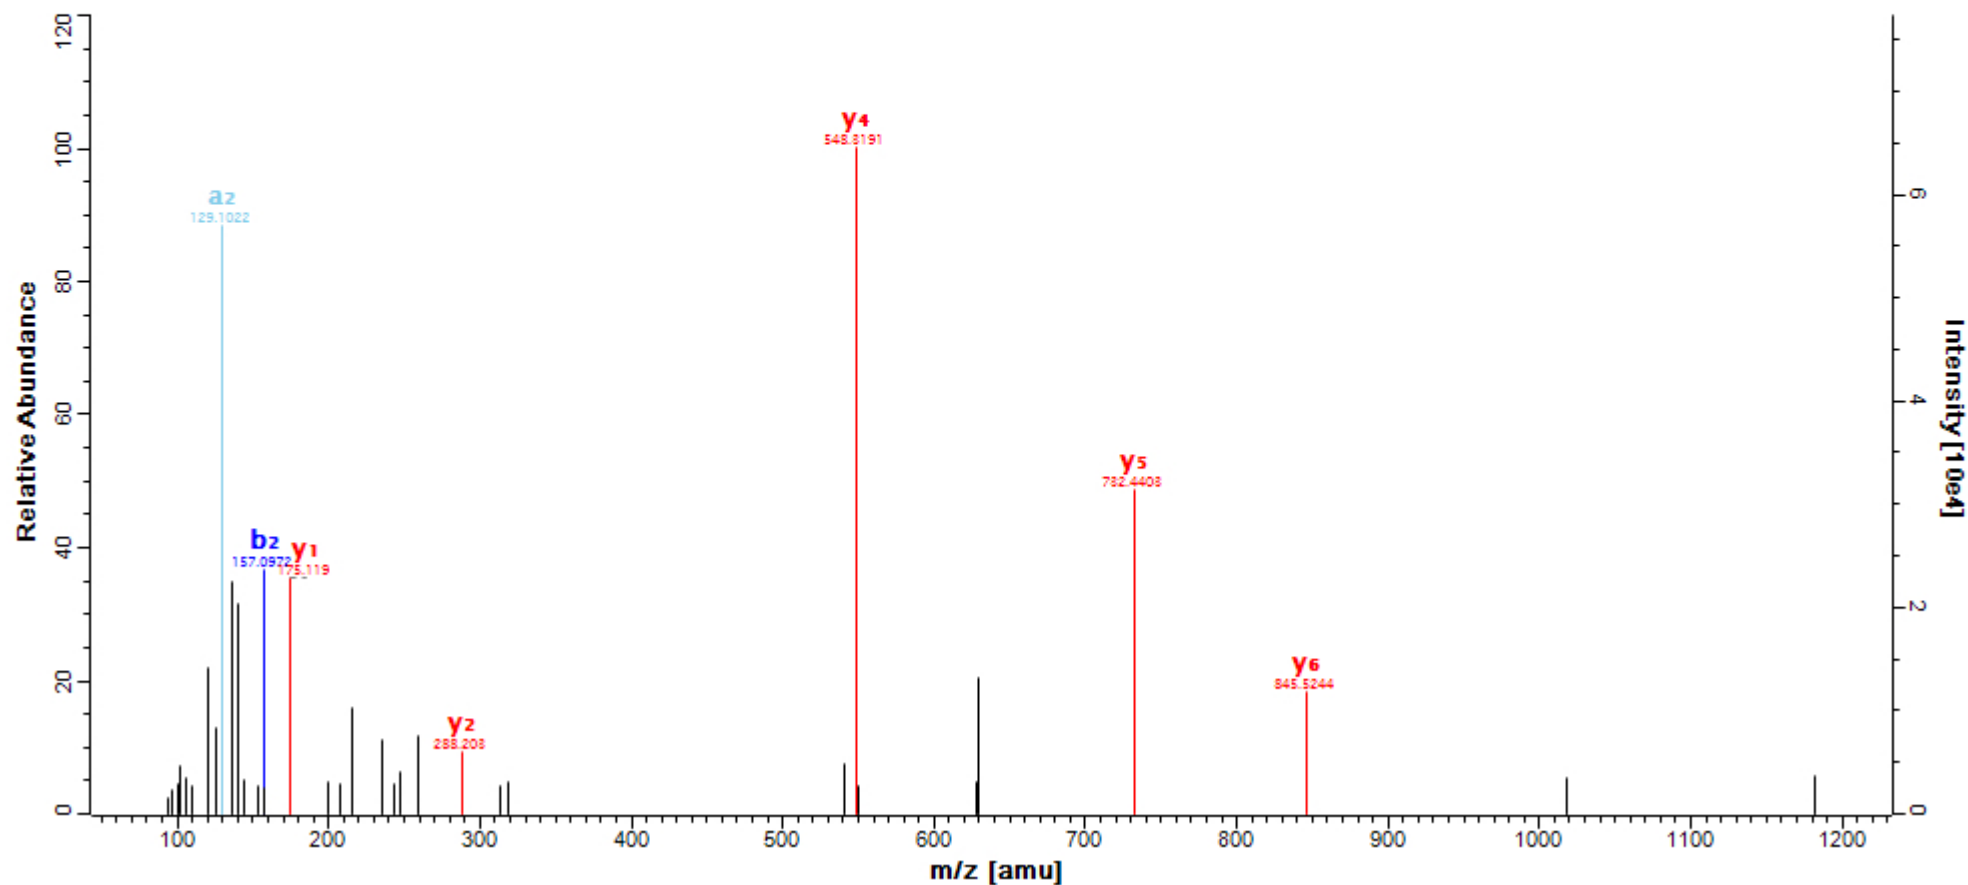

Scan number 6809  
Method FTMS; HCD

Raw file Kprop8  
Peptide 84.75

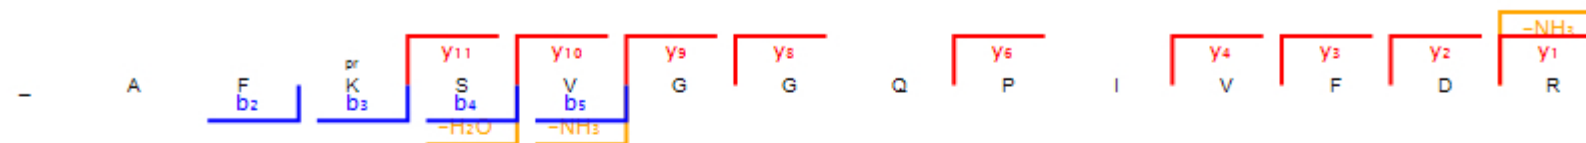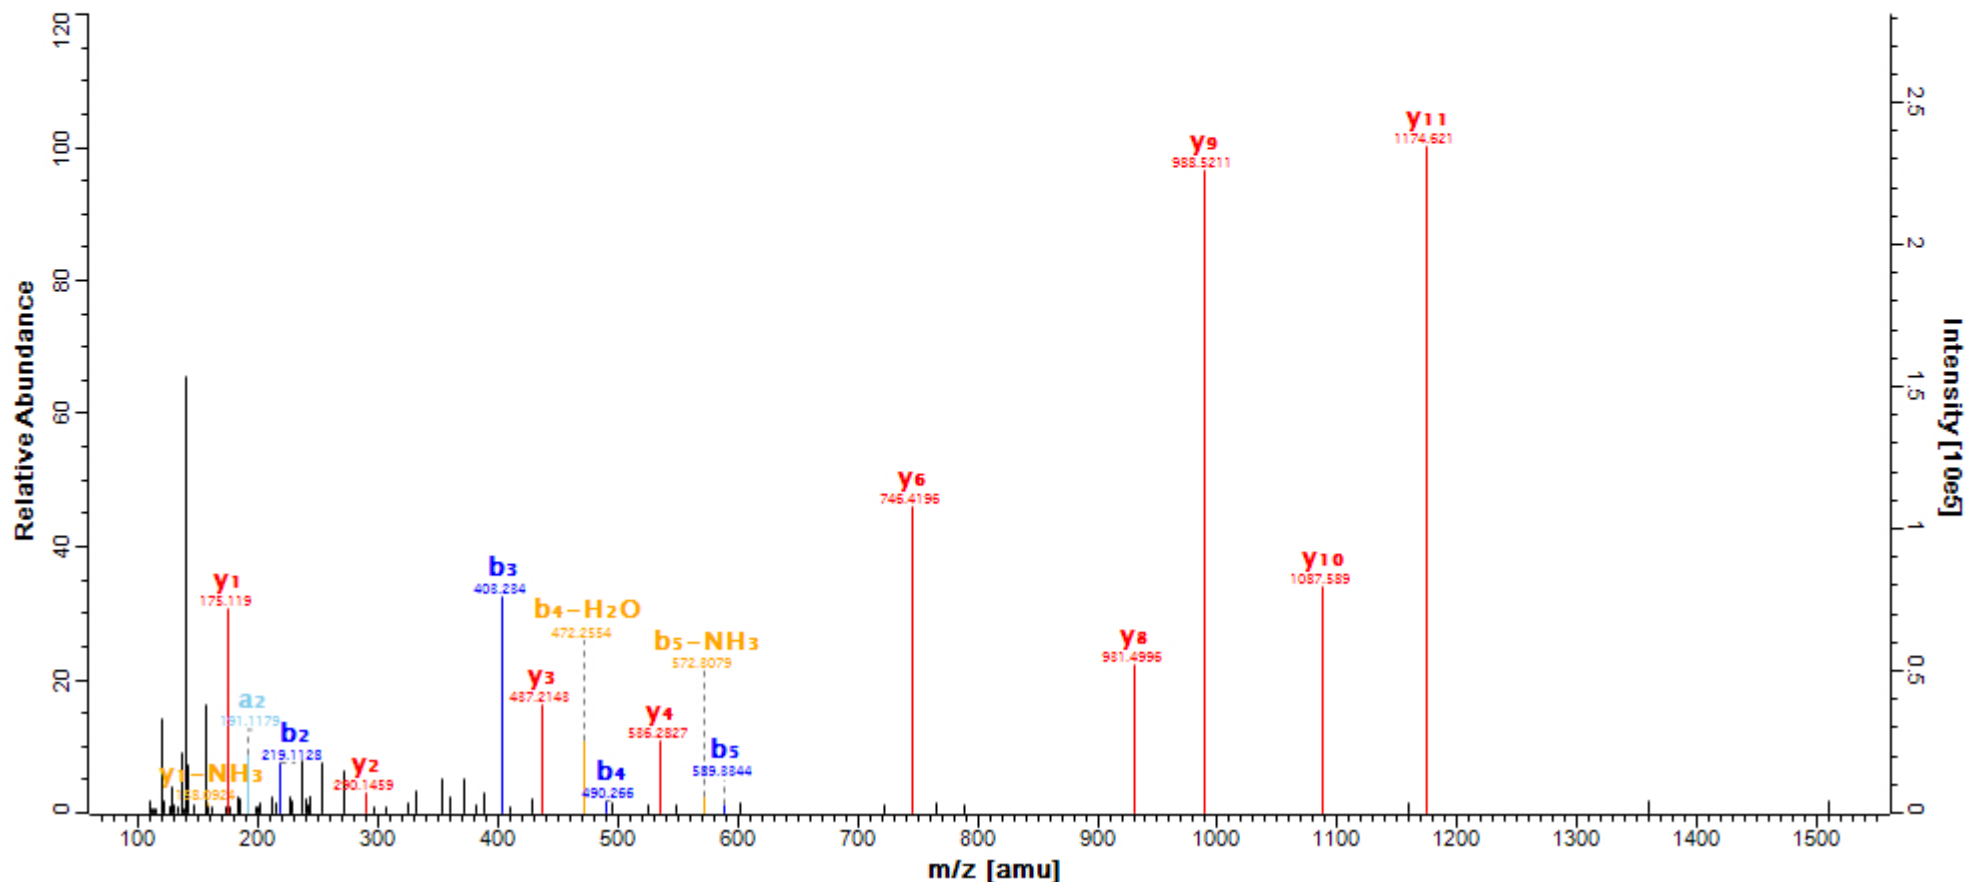

Scan number 6919  
Method FTMS; HCD

Raw file Kprop8  
Peptide 56.53

- I D T S G E L T G V G I Q I T Q D Q D T K K -

b<sub>6</sub> y<sub>15</sub> y<sub>14</sub> y<sub>12</sub> y<sub>10</sub>-NH<sub>3</sub> y<sub>9</sub> y<sub>8</sub> y<sub>10</sub>-NH<sub>3</sub> y<sub>5</sub> y<sub>3</sub>

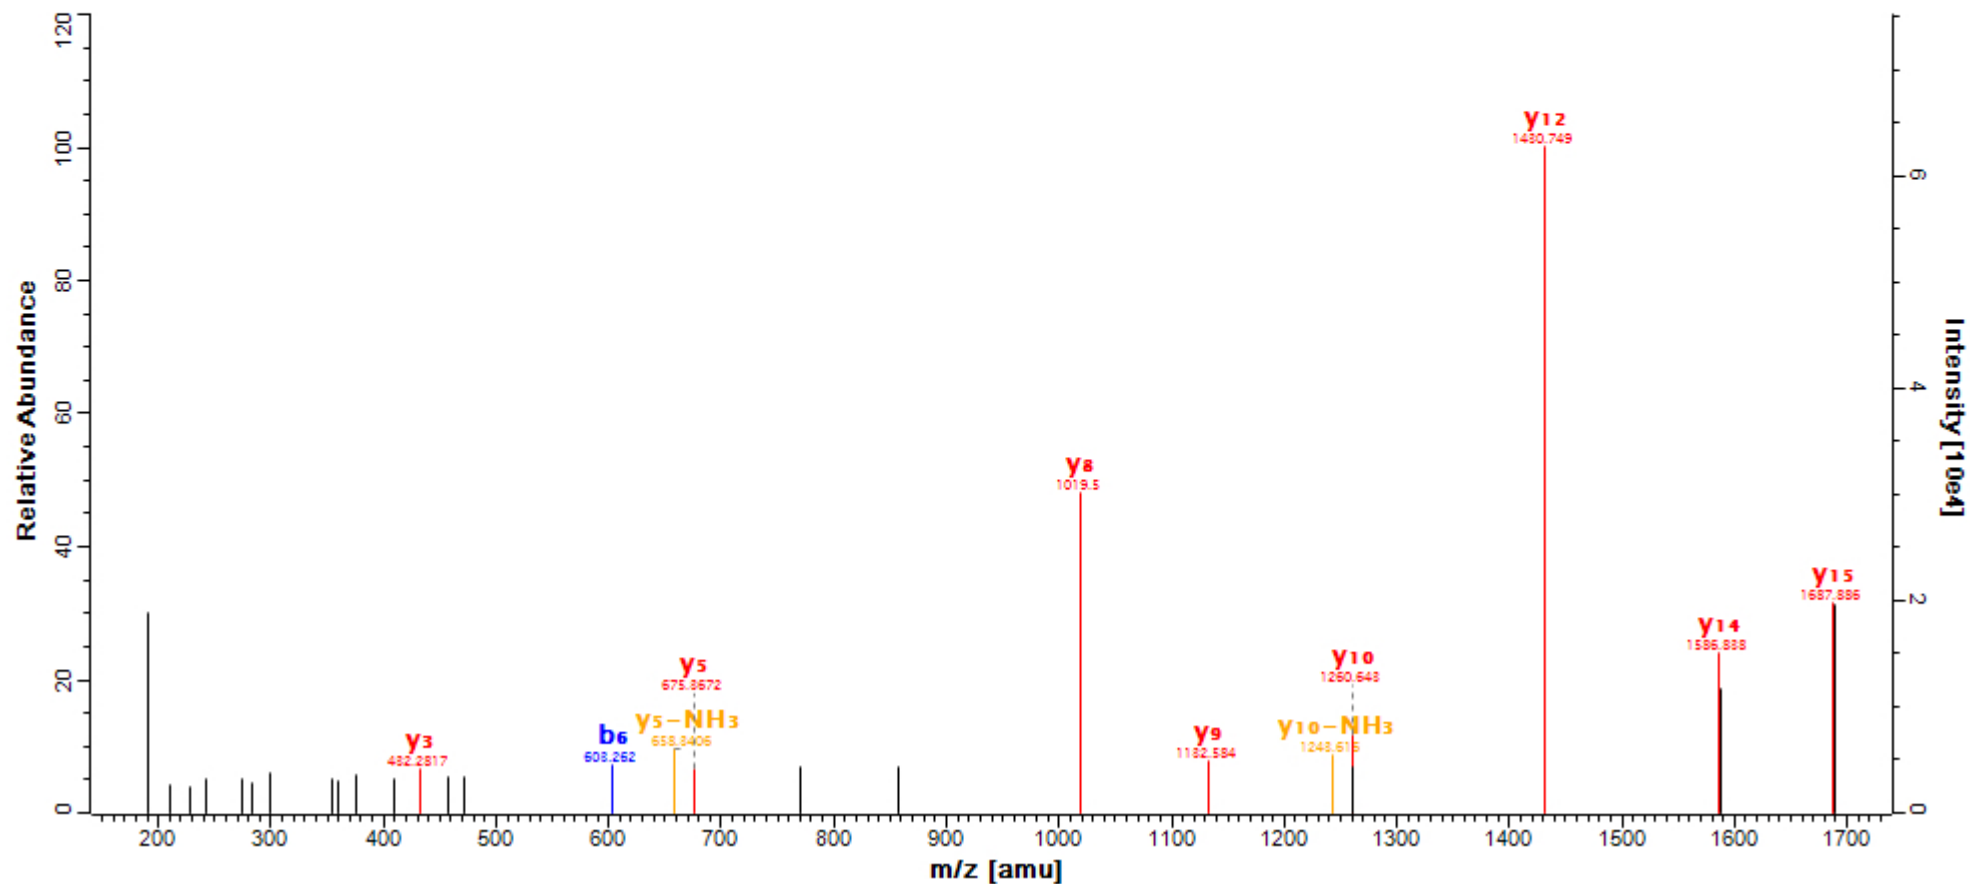



Scan number 7071  
Method FTMS; HCD

Raw file Kprop8  
Peptide 137.14

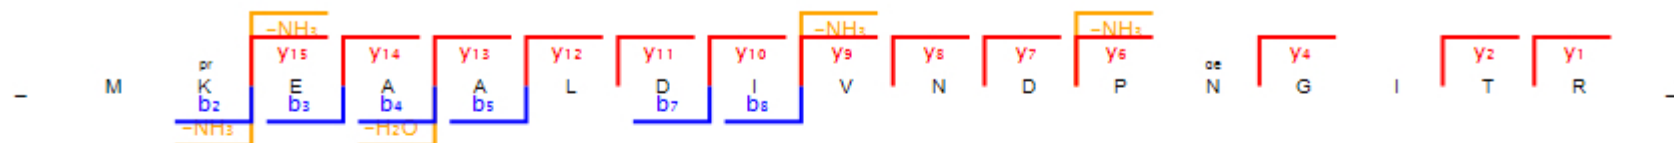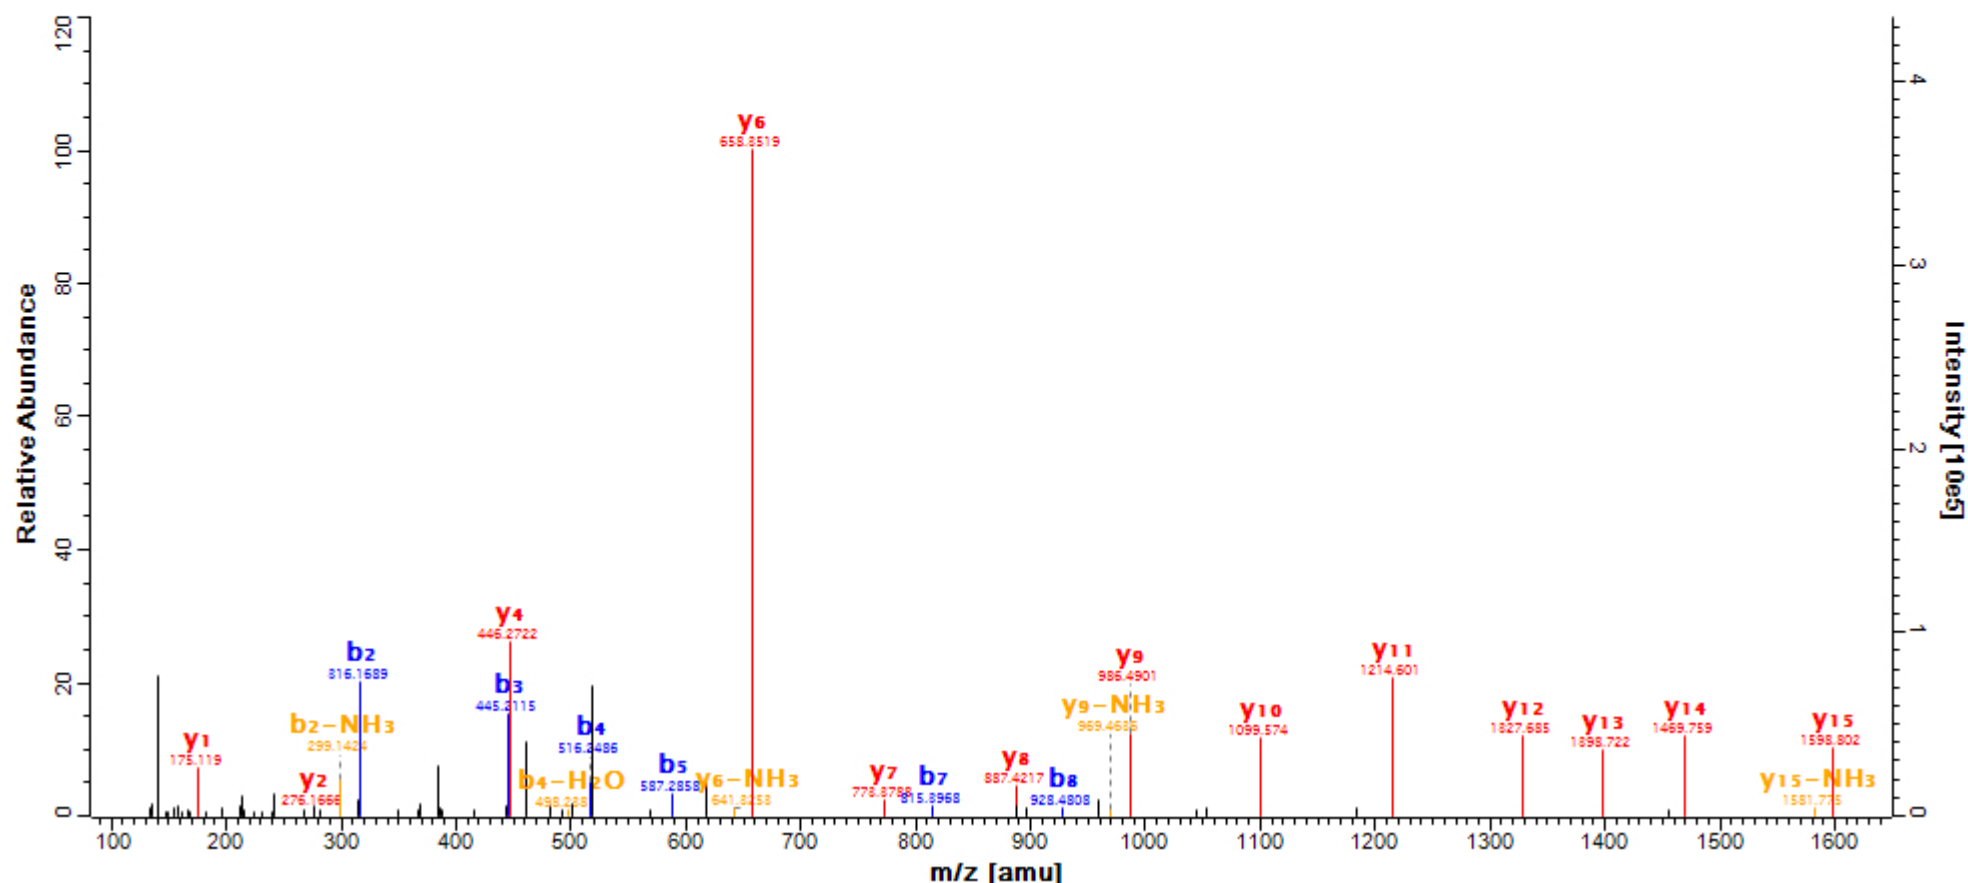

Scan number 7514 Raw file Kprop8  
Method FTMS; HCD Peptide 103.21

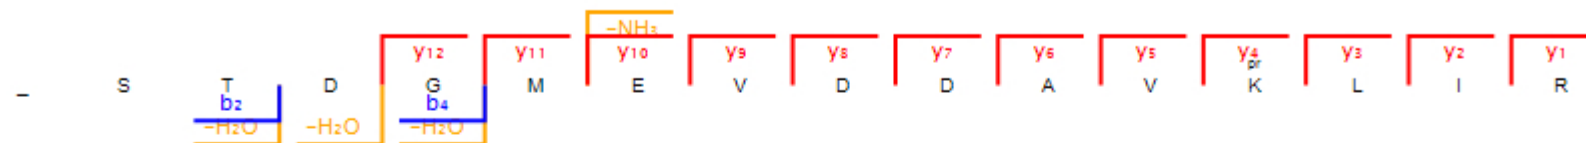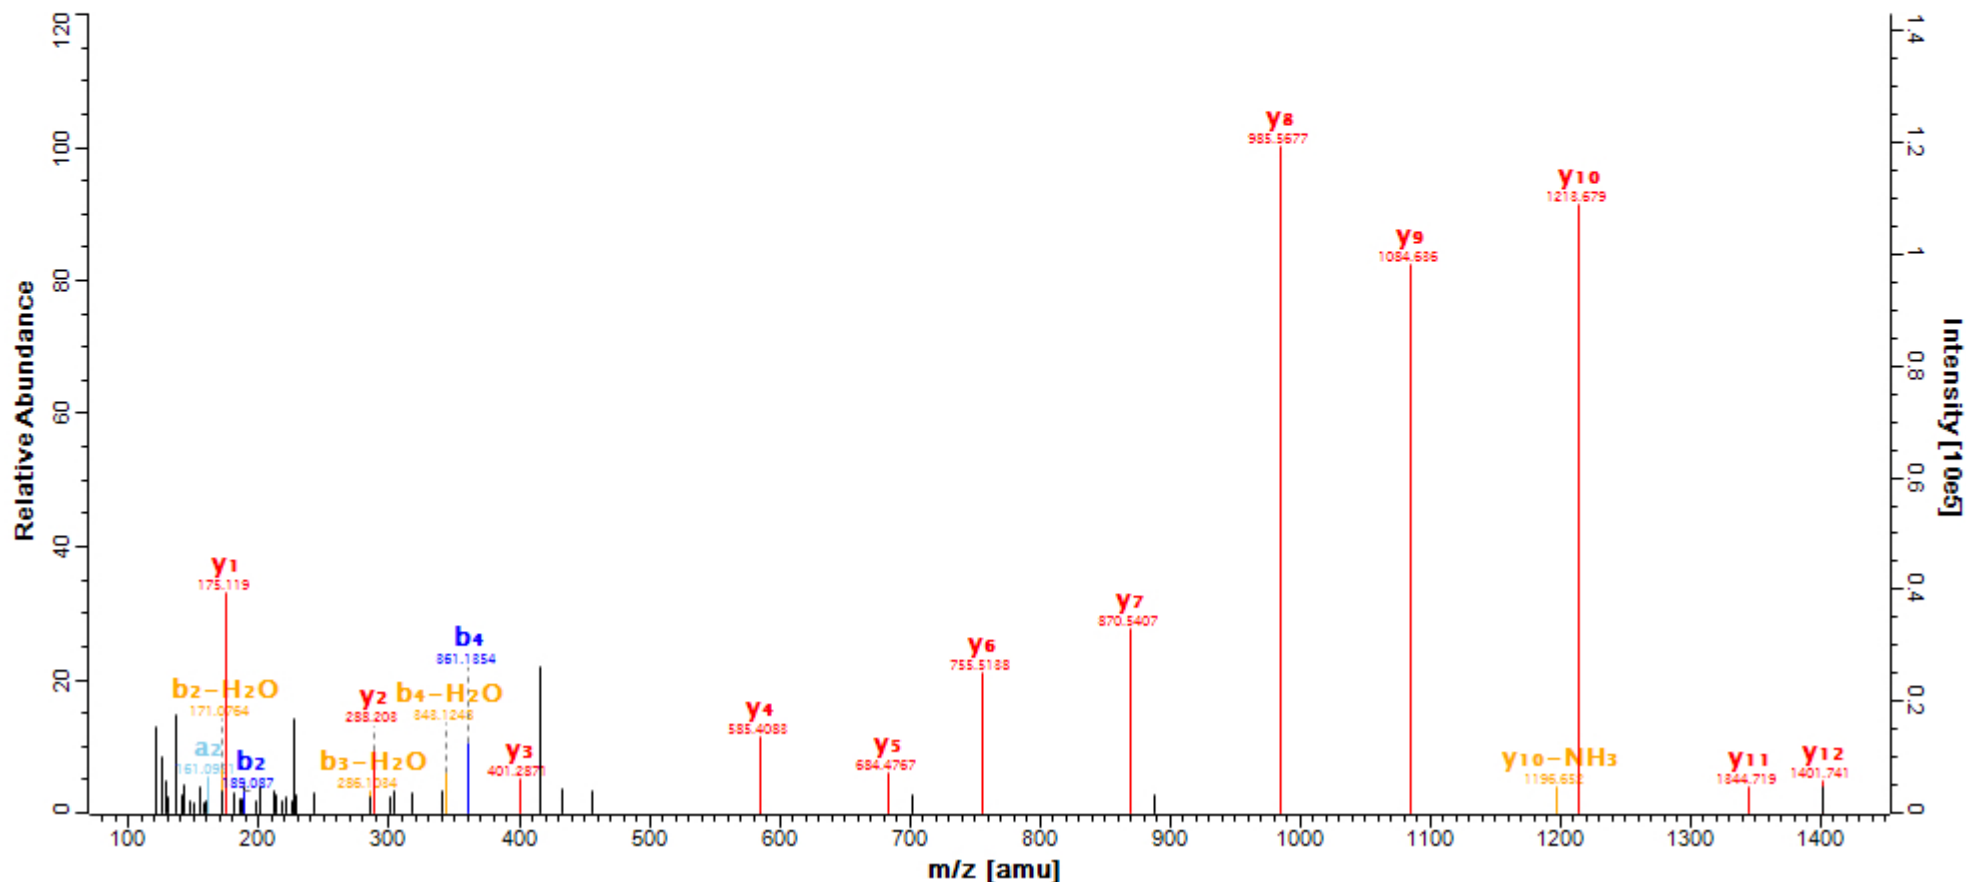

|             |           |          |        |
|-------------|-----------|----------|--------|
| Scan number | 7962      | Raw file | Kprop8 |
| Method      | FTMS; HCD | Pepti... | 109.35 |

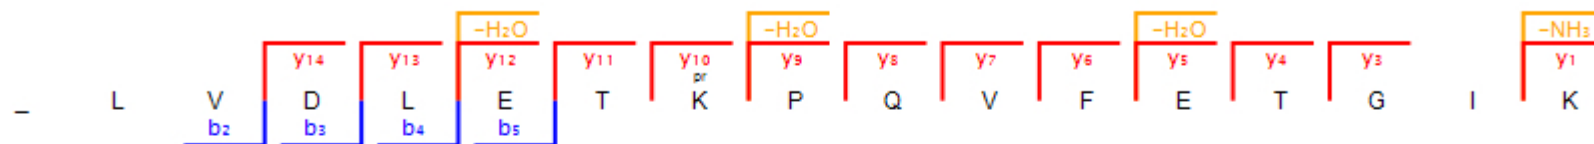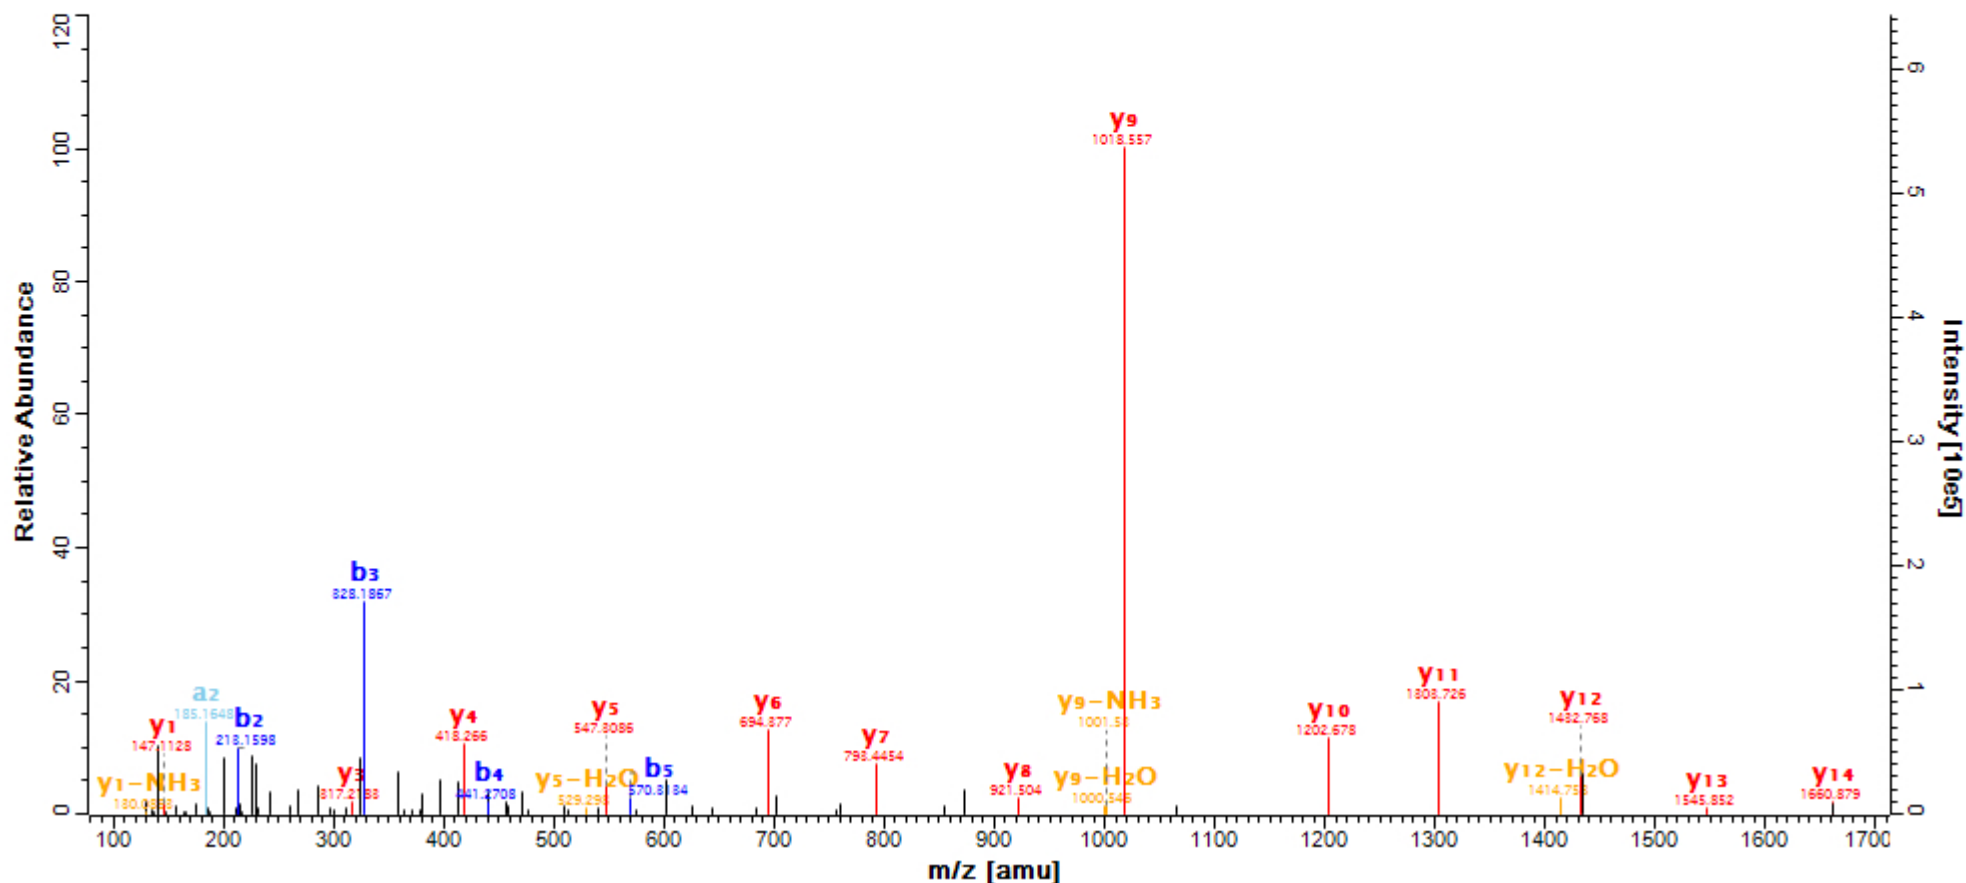

|             |           |          |        |
|-------------|-----------|----------|--------|
| Scan number | 8175      | Raw file | Kprop8 |
| Method      | FTMS; HCD | Pepti... | 63.58  |

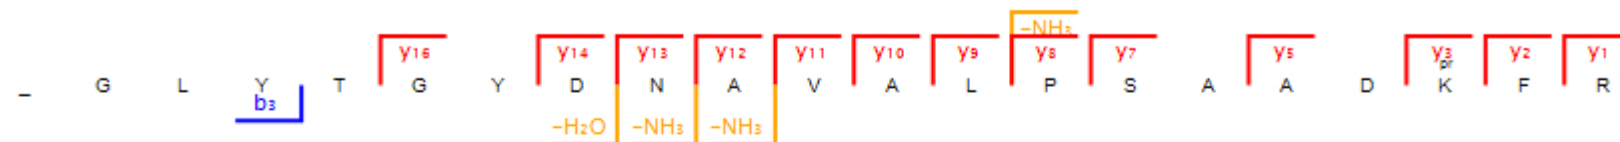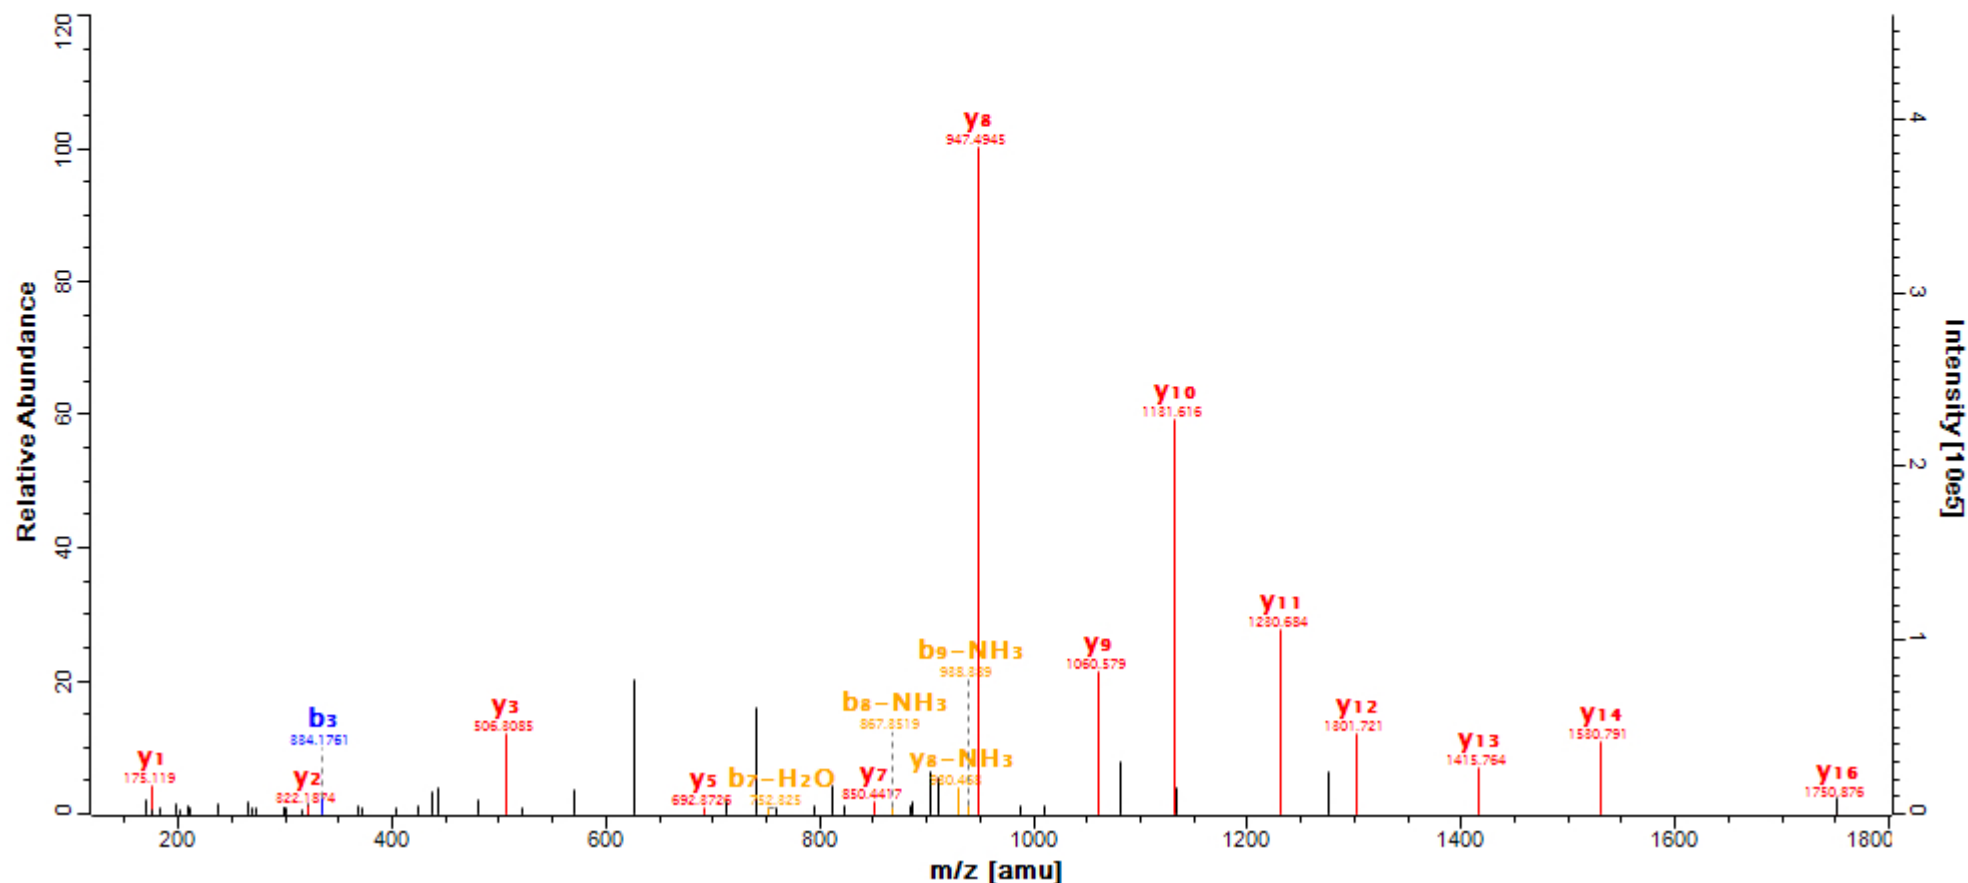

Scan number 8427 Raw file Kprop8  
Method FTMS; HCD Peptide 179.39

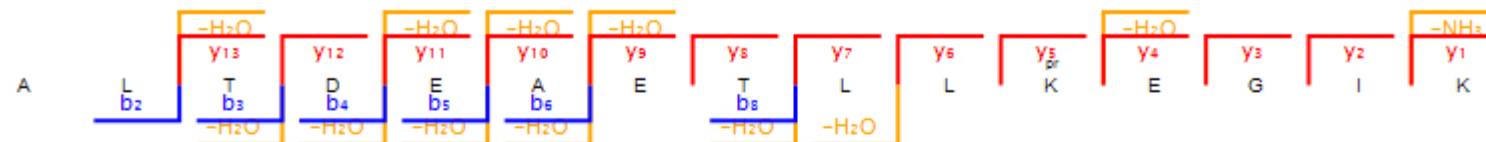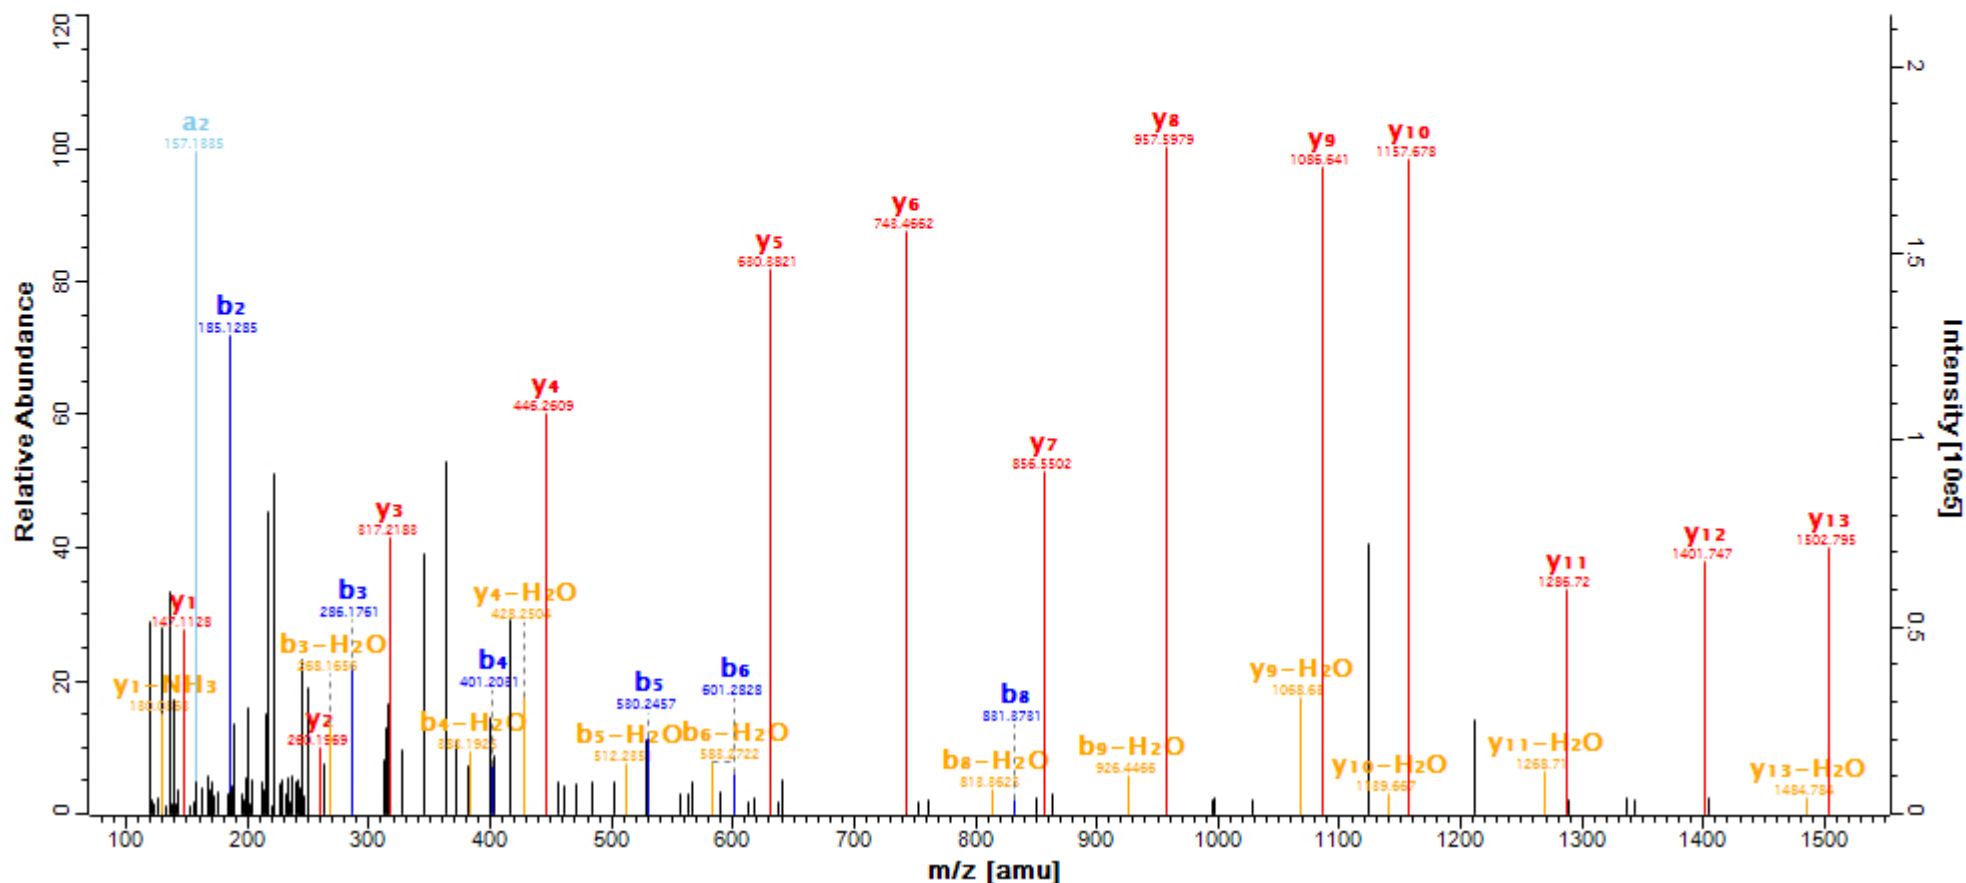

Scan number 8454  
Method FTMS; HCD

Raw file Kprop8  
Peptide 61.04

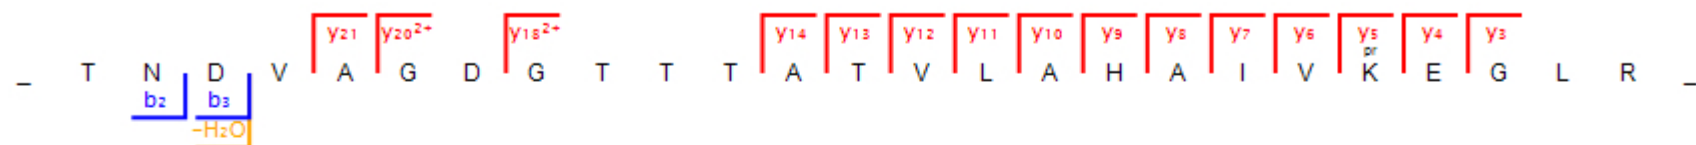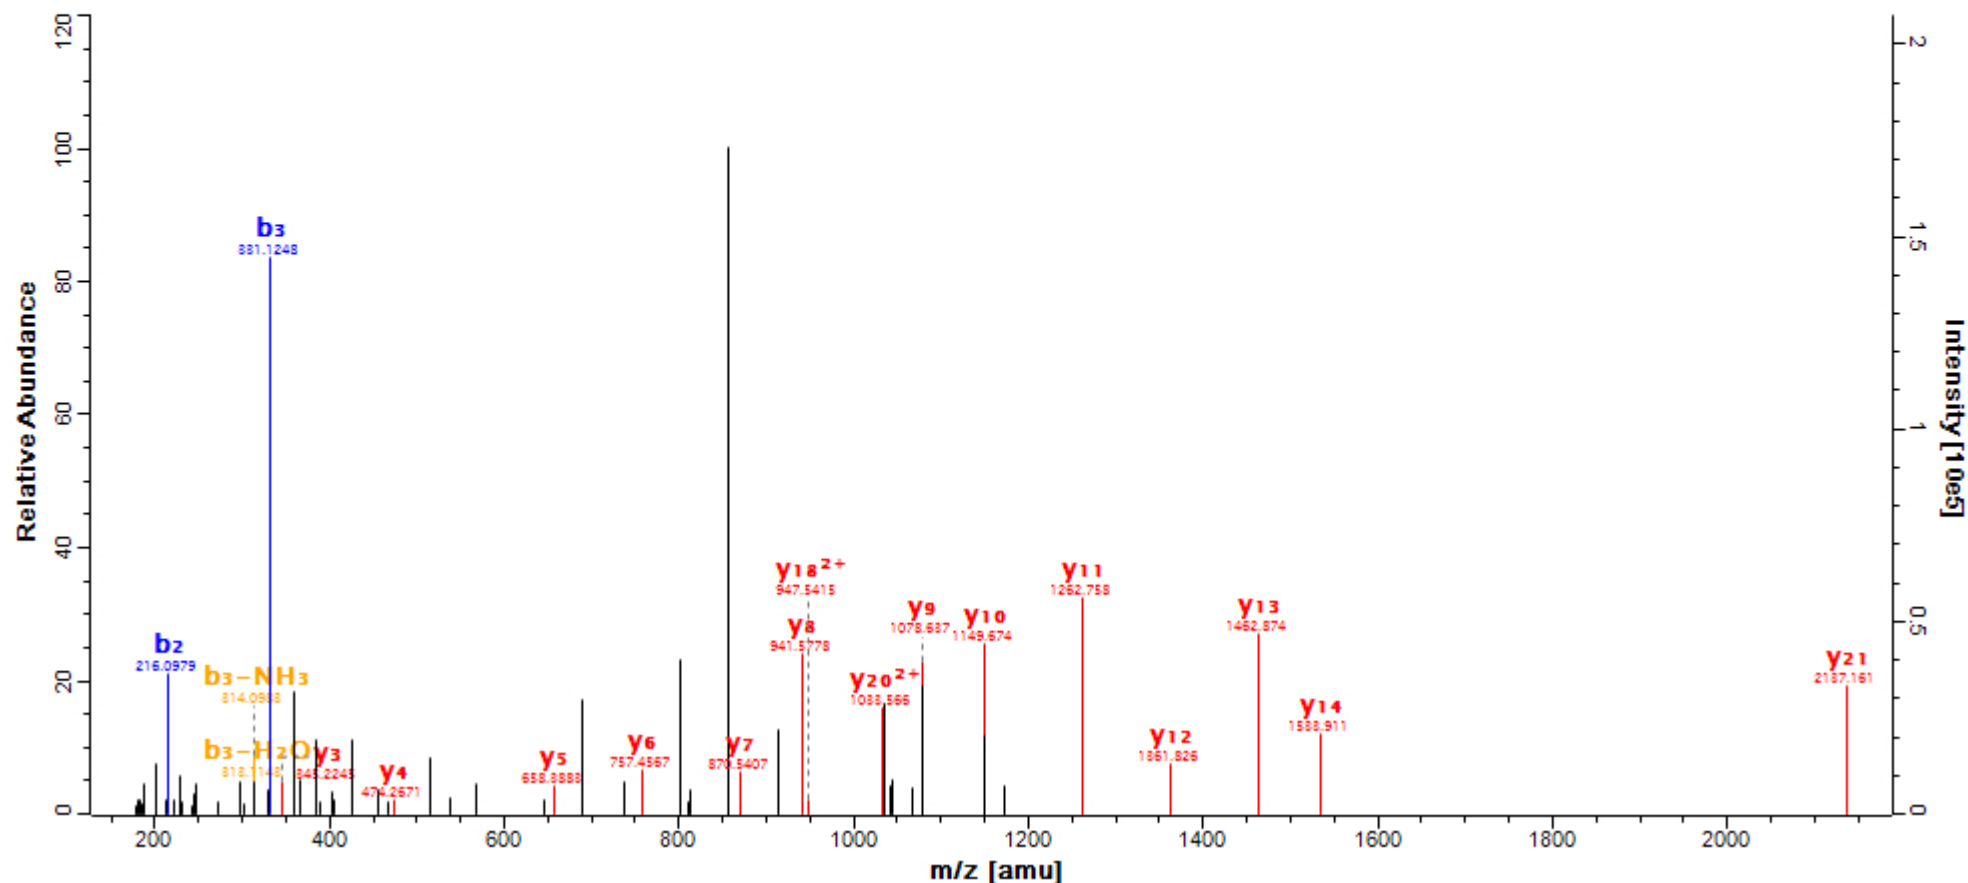

Scan number 9000 Raw file Kprop8  
Method FTMS; HCD Peptide 137.52

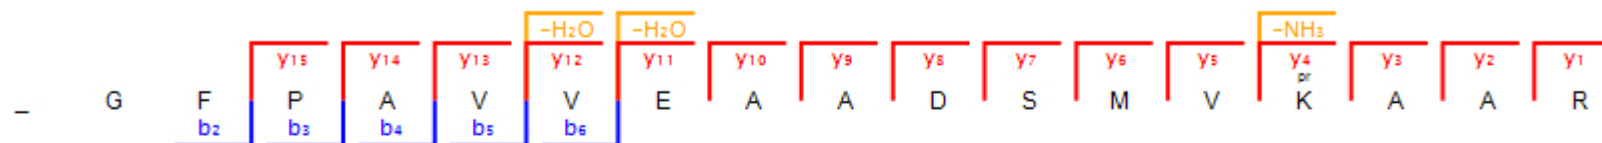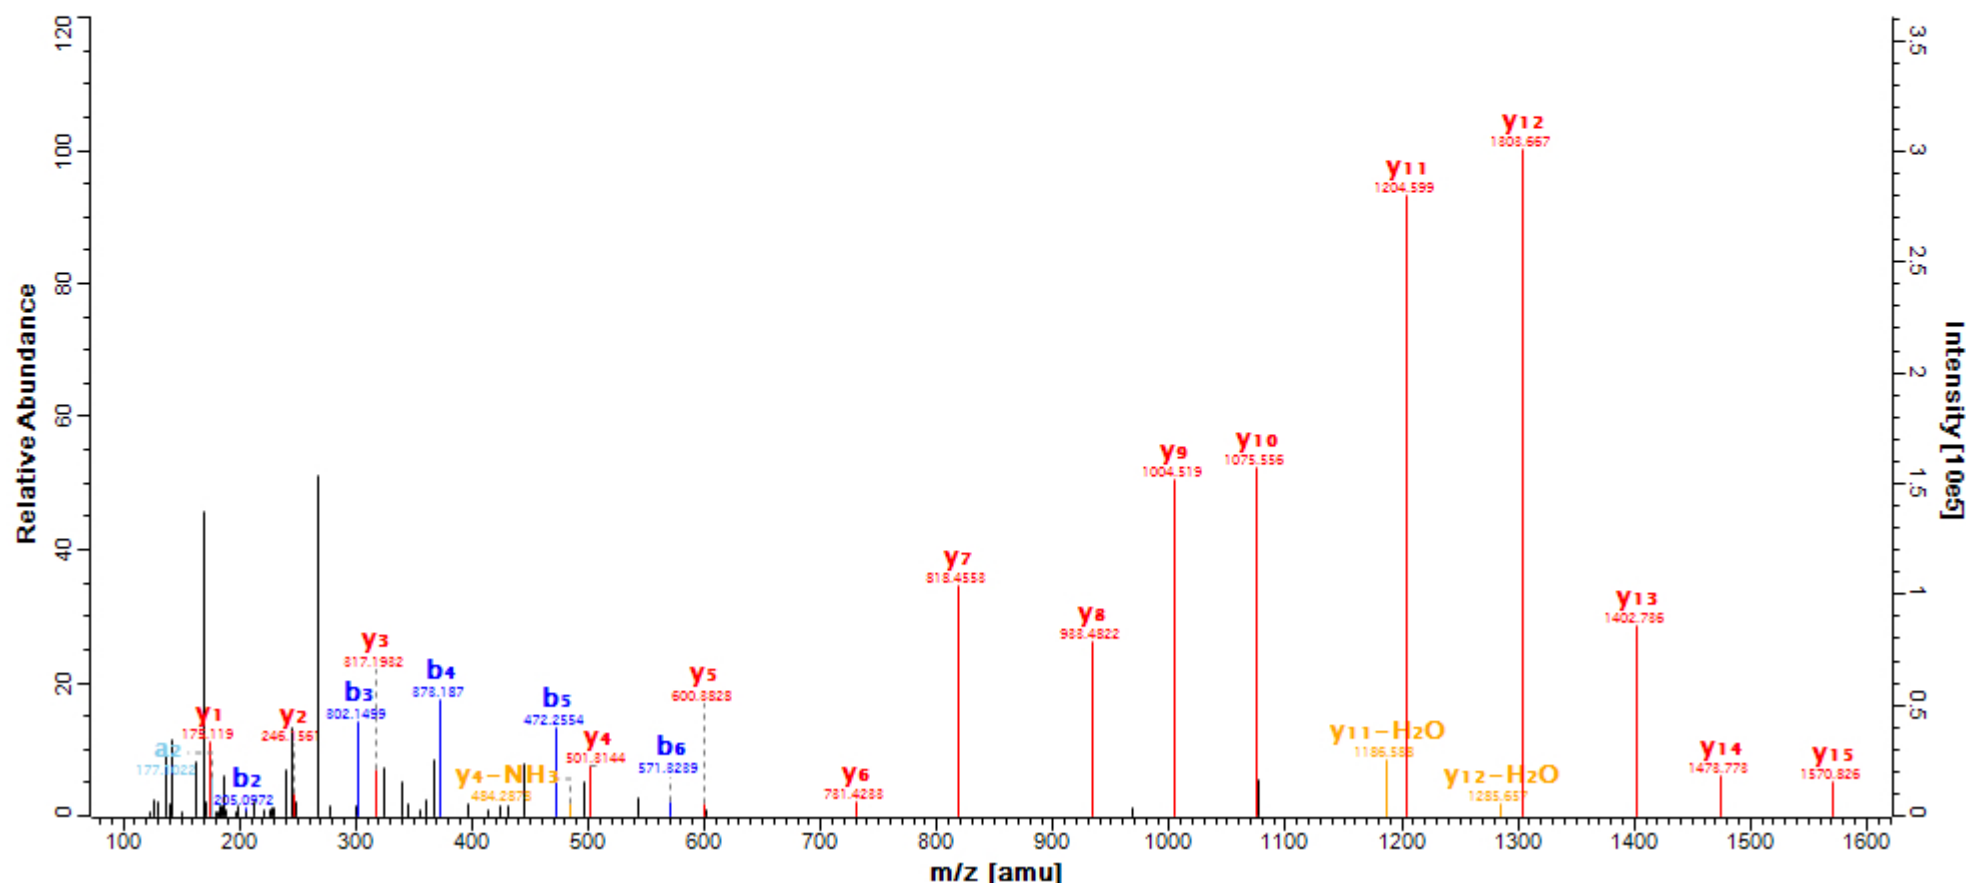

Supplement: s1 [file s1]
